# Supplementary material for: Complete Chloroplast Genome Sequence of Coptis chinensis Franch. and Its Evolutionary History
Source: Hindawi journal article supplement (doi:10.1155/2017/8201836), 2017-01-01
Supplement: f1 [file 8201836.f1.zip]

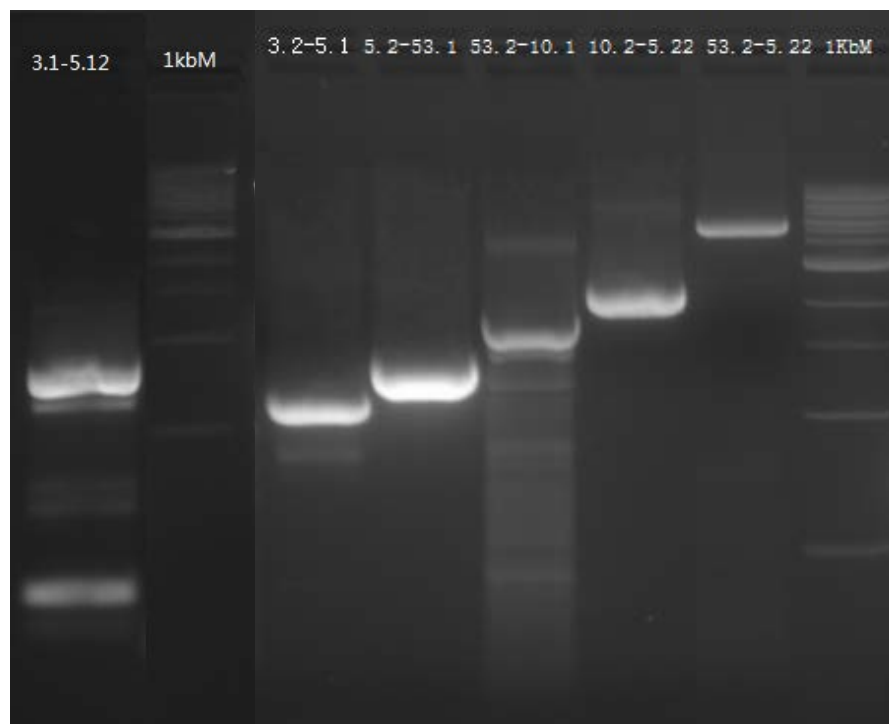

**Figure S1.** PCR products on agarose gel electrophoresis. Each lane represents the PCR product of gap area (Table S2), except that the “1KbM” is the marker lane.
