# Supplementary material for: Complete Chloroplast Genome Sequence of Coptis chinensis Franch. and Its Evolutionary History
Source: Biomed Res Int. 2017 Jun 18;2017:8201836. doi: 10.1155/2017/8201836 (PMC5494076; doi:10.1155/2017/8201836)
Supplement: Supplementary file 1 — Table S1. Mapping the contigs from goldthread chloroplast genome to the chloroplast genome of Megaleranthis saniculifolia. Table S2. The primers used for PCR during gapping closing. Table S3. Species used in this project. Table S4. Best hits with nr database of proteins in goldthread chloroplast genome. Table S5. Best hits with KEGG database of proteins in goldthread chloroplast genome. Table S6. Best hits with COG databases of proteins in goldthread chloroplast genome. Table S7. Best hits with COG database of chloroplast proteins from golthread and the other species. Table S8. The COG (Clusters of Orthologous Groups) classification and distribution of genes in different species. Table S9. LRT analysis of 42 genes in all 24 chloroplast genomes. Table S10. SSRs detected in goldthread and other species. Table S11. Detailed statistics of chloroplast SSRs detected in 24 species. Figure S1. PCR products on agarose gel electrophoresis. Each lane represents the PCR product of gap area (Table S2), except that the “1KbM” is the marker lane. [file 8201836.f1.zip › Supplementary Tables.xlsx]

## Sheet: Table S1
	Table S1. Mapping the contigs from goldthread chloroplast genome to the chloroplast genome of Megaleranthis saniculifolia
	contig name	reference	identity	contig start	contig end	reference start	reference end
	NODE_3_length_63930_cov_64.168449	gi|226933860|gb|FJ597983.1|	97.1	1	1207	401	1607
	NODE_3_length_63930_cov_64.168449	gi|226933860|gb|FJ597983.1|	90.17	1272	3908	1710	4341
	NODE_3_length_63930_cov_64.168449	gi|226933860|gb|FJ597983.1|	90.53	4483	4862	5044	5420
	NODE_3_length_63930_cov_64.168449	gi|226933860|gb|FJ597983.1|	91.53	4944	5716	5505	6267
	NODE_3_length_63930_cov_64.168449	gi|226933860|gb|FJ597983.1|	89.58	6460	7616	7379	8574
	NODE_3_length_63930_cov_64.168449	gi|226933860|gb|FJ597983.1|	87.84	8165	9521	9207	10561
	NODE_3_length_63930_cov_64.168449	gi|226933860|gb|FJ597983.1|	95.56	9522	11792	10598	12874
	NODE_3_length_63930_cov_64.168449	gi|226933860|gb|FJ597983.1|	94.88	11788	12429	12899	13537
	NODE_3_length_63930_cov_64.168449	gi|226933860|gb|FJ597983.1|	84.14	12465	13929	13646	15078
	NODE_3_length_63930_cov_64.168449	gi|226933860|gb|FJ597983.1|	93.55	14066	15995	15092	17018
	NODE_3_length_63930_cov_64.168449	gi|226933860|gb|FJ597983.1|	94.12	16116	27290	17110	28319
	NODE_3_length_63930_cov_64.168449	gi|226933860|gb|FJ597983.1|	86.09	28157	28967	29195	30000
	NODE_3_length_63930_cov_64.168449	gi|226933860|gb|FJ597983.1|	93.17	29888	30364	31006	31488
	NODE_3_length_63930_cov_64.168449	gi|226933860|gb|FJ597983.1|	93.37	30903	31294	32683	33066
	NODE_3_length_63930_cov_64.168449	gi|226933860|gb|FJ597983.1|	95.19	33108	36612	35125	38620
	NODE_3_length_63930_cov_64.168449	gi|226933860|gb|FJ597983.1|	92.97	36811	45973	38836	48032
	NODE_3_length_63930_cov_64.168449	gi|226933860|gb|FJ597983.1|	89.35	46038	47308	48109	49379
	NODE_3_length_63930_cov_64.168449	gi|226933860|gb|FJ597983.1|	87.02	47860	49151	50550	51848
	NODE_3_length_63930_cov_64.168449	gi|226933860|gb|FJ597983.1|	92.85	49399	51312	52335	54255
	NODE_3_length_63930_cov_64.168449	gi|226933860|gb|FJ597983.1|	93.08	52389	53428	55610	56628
	NODE_3_length_63930_cov_64.168449	gi|226933860|gb|FJ597983.1|	93.52	53444	55660	56668	58884
	NODE_3_length_63930_cov_64.168449	gi|226933860|gb|FJ597983.1|	94.74	55914	57674	59202	60950
	NODE_3_length_63930_cov_64.168449	gi|226933860|gb|FJ597983.1|	91.28	57970	59904	61263	63215
	NODE_3_length_63930_cov_64.168449	gi|226933860|gb|FJ597983.1|	91.46	60173	61452	63560	64822
	NODE_3_length_63930_cov_64.168449	gi|226933860|gb|FJ597983.1|	92.81	61521	63879	65193	67581
	NODE_5_length_46949_cov_110.028114	gi|226933860|gb|FJ597983.1|	93.19	100	1352	67759	69027
	NODE_5_length_46949_cov_110.028114	gi|226933860|gb|FJ597983.1|	89.68	1701	2919	69580	70798
	NODE_5_length_46949_cov_110.028114	gi|226933860|gb|FJ597983.1|	89.79	3025	4591	70925	72492
	NODE_5_length_46949_cov_110.028114	gi|226933860|gb|FJ597983.1|	90.95	4616	6005	72493	73893
	NODE_5_length_46949_cov_110.028114	gi|226933860|gb|FJ597983.1|	93.22	6115	6509	74026	74423
	NODE_5_length_46949_cov_110.028114	gi|226933860|gb|FJ597983.1|	92.54	6527	11243	74482	79185
	NODE_5_length_46949_cov_110.028114	gi|226933860|gb|FJ597983.1|	93.16	11494	13867	79533	81886
	NODE_5_length_46949_cov_110.028114	gi|226933860|gb|FJ597983.1|	93.67	14067	16764	82083	84787
	NODE_5_length_46949_cov_110.028114	gi|226933860|gb|FJ597983.1|	92.4	16845	17908	84863	85947
	NODE_5_length_46949_cov_110.028114	gi|226933860|gb|FJ597983.1|	89.41	18354	18752	86415	86803
	NODE_5_length_46949_cov_110.028114	gi|226933860|gb|FJ597983.1|	97.17	18821	35222	86874	103340
	NODE_5_length_46949_cov_110.028114	gi|226933860|gb|FJ597983.1|	98.27	35192	44667	103340	112833
	NODE_5_length_46949_cov_110.028114	gi|226933860|gb|FJ597983.1|	97.21	44614	46360	112842	114594
	NODE_5_length_46949_cov_110.028114	gi|226933860|gb|FJ597983.1|	97.09	46388	46662	114595	114869
	NODE_53_length_14108_cov_58.382122	gi|226933860|gb|FJ597983.1|	89.69	96	735	114988	115627
	NODE_53_length_14108_cov_58.382122	gi|226933860|gb|FJ597983.1|	92.21	809	2354	115731	117279
	NODE_53_length_14108_cov_58.382122	gi|226933860|gb|FJ597983.1|	90.15	3495	4854	119205	120573
	NODE_53_length_14108_cov_58.382122	gi|226933860|gb|FJ597983.1|	94.06	5105	7165	120789	122856
	NODE_53_length_14108_cov_58.382122	gi|226933860|gb|FJ597983.1|	96.23	7237	7607	122948	123318
	NODE_53_length_14108_cov_58.382122	gi|226933860|gb|FJ597983.1|	94.39	7792	8449	123502	124157
	NODE_53_length_14108_cov_58.382122	gi|226933860|gb|FJ597983.1|	93	8628	10106	124344	125839
	NODE_53_length_14108_cov_58.382122	gi|226933860|gb|FJ597983.1|	91.7	10129	10602	125929	126407
	NODE_53_length_14108_cov_58.382122	gi|226933860|gb|FJ597983.1|	94	10600	12443	126460	128308
	NODE_53_length_14108_cov_58.382122	gi|226933860|gb|FJ597983.1|	90.3	12480	12840	128372	128739
	NODE_10_length_3213_cov_50.454403	gi|226933860|gb|FJ597983.1|	86.3	295	1169	130029	130933
	NODE_5_length_46949_cov_110.028114	gi|226933860|gb|FJ597983.1|	89.74	46388	47024	133656	133014
	NODE_5_length_46949_cov_110.028114	gi|226933860|gb|FJ597983.1|	97.21	44614	46360	135409	133657
	NODE_5_length_46949_cov_110.028114	gi|226933860|gb|FJ597983.1|	98.27	35192	44667	144911	135418
	NODE_5_length_46949_cov_110.028114	gi|226933860|gb|FJ597983.1|	97.55	20276	35222	159924	144911

## Sheet: Table S2
Table S2.The primers used for PCR during gapping closing
Pair	primer No.	Strand	primer sequence	primer length	Tm(℃)	expected product length	location on Contig	involved contigs
1	hl-3P2	F	TGGGCGGTAATAGGGGAAGG	20	63.6	1200	63380	contig3&contig5
	hl-5P1	R	CACAATCAAACCCGAACGAAC	21	63.9		550
2	hl-5P2	F	AAGGGGACTAAACAGGAACAAGAG	24	60.4	1300	46430	contig5&contig53
	hl-53P1	R	CTTGTTTCACGGCGGGGTTA	20	61		950
3	hl-53P2	F	TTGACAAATAAGCCAATAGCCG	22	60.1	1500	12560	contig53&contig10
	hl-10P1	R	TATCAGAGCCGACGCCAACA	20	62.3		350
4	hl-10P2	F	AAAAGGGGTTGTTCCGTGAT	20	58.5	3000	970	contig10&contig5
	hl-5P22	R	AGATGTTTTTCTGCCGTGC	19	55.9		46910
5	hl-5P12	F	TGAACCCCGTAGACCATCCC	20	61.7		20590	contig5&contig3
	hl-3P1	R	GTATTCGGCGGCTCCCTATT	20	60.9		430
	hl-5P1 and hl-5P2 are the primers for the contig NODE5 ranging from 100bp to 46662bp
	hl-5P12 and hl-5P22 are the primers for the contig NODE5 ranging from 20276bp to 47024bp
	The primer with P1 suffix loactes at the 5' of contig, while the primer with P2 suffix loactes at the 3' of contig

## Sheet: Table S3
Table S3. Species used in this project
Accession Number	Species	Note
NC_030504.1	Liriodendron chinense	outgroup
NC_008326.1	Liriodendron tulipifera	outgroup
NC_029944.1	Epimedium lishihchenii	Ranunculales
NC_030063.1	Berberis koreana	Ranunculales
NC_030062.1	Berberis amurensis	Ranunculales
NC_030061.1	Gymnospermium microrrhynchum	Ranunculales
NC_029945.1	Epimedium pseudowushanense	Ranunculales
NC_029943.1	Epimedium koreanum	Ranunculales
NC_029942.1	Epimedium dolichostemon	Ranunculales
NC_029941.1	Epimedium acuminatum	Ranunculales
NC_029829.1	Aconitum chiisanense	Ranunculales
NC_029434.1	Papaver somniferum	Ranunculales
NC_029432.1	Stephania japonica	Ranunculales
NC_029429.1	Euptelea pleiosperma	Ranunculales
NC_029428.1	Epimedium sagittatum	Ranunculales
NC_029427.1	Akebia trifoliata	Ranunculales
NC_028000.1	Clematis terniflora	Ranunculales
NC_027732.1	Sinopodophyllum hexandrum	Ranunculales
NC_026103.1	Thalictrum coreanum	Ranunculales
NC_022457.1	Berberis bealei	Ranunculales
NC_012615.1	Megaleranthis saniculifolia	Ranunculales
NC_008796.1	Ranunculus macranthus	Ranunculales
NC_008336.1	Nandina domestica	Ranunculales

## Sheet: Table S4
Table S4: Best hits with nr database of proteins in goldthread chloroplast genome.
Sequences	nrID	percIdentity	alnLength	mismatchCount	gapOpenCount	queryStart	queryEnd	subjectStart	subjectEnd	eVal	bitScore	nrAnnotation
Cchin_cp-78-mRNA-1	gi|511369803|gb|AGN73960.1|	99.72	353	1	0	1	353	1	353	0	714	photosystem II protein D1 (chloroplast) (chloroplast) [Aconitum barbatum var. puberulum]
Cchin_cp-5-mRNA-1	gi|388240508|dbj|BAM15750.1|	99.61	508	2	0	1	508	1	508	0	1034	maturase K (chloroplast) [Coptis chinensis]
Cchin_cp-64-mRNA-1	gi|334361931|ref|YP_004563849.1|	94.59	74	4	0	2	75	13	86	1e-43	144	ribosomal protein S16 [Nelumbo lutea]
Cchin_cp-45-mRNA-1	gi|511369806|gb|AGN73963.1|	91.8	61	5	0	1	61	1	61	2e-31	111	photosystem II protein K (chloroplast) (chloroplast) [Aconitum barbatum var. puberulum]
Cchin_cp-73-mRNA-1	gi|69217410|gb|AAZ04048.1|	88.46	52	6	0	1	52	2	53	1e-22	88.6	photosystem II protein I [Ranunculus macranthus]
Cchin_cp-34-mRNA-1	gi|511369808|gb|AGN73965.1|	97.24	507	14	0	1	507	1	507	0	997	ATP synthase CF1 alpha subunit (chloroplast) (chloroplast) [Aconitum barbatum var. puberulum]
Cchin_cp-8-mRNA-1	gi|229577740|ref|YP_002836076.1|	95.14	185	8	1	1	185	1	184	2e-122	352	ATP synthase CF0 subunit I [Megaleranthis saniculifolia]
Cchin_cp-87-mRNA-1	gi|546352760|gb|AGW96663.1|	100	81	0	0	1	81	1	81	8e-47	152	ATP synthase CF0 subunit III (chloroplast) [Argyreia nervosa]
Cchin_cp-21-mRNA-1	gi|229577742|ref|YP_002836078.1|	99.6	247	1	0	1	247	1	247	5e-177	496	ATP synthase CF0 subunit IV [Megaleranthis saniculifolia]
Cchin_cp-20-mRNA-1	gi|114329957|ref|YP_740639.1|	97.03	236	7	0	1	236	1	236	4e-171	480	ribosomal protein S2 [Nandina domestica]
Cchin_cp-32-mRNA-1	gi|229577744|ref|YP_002836080.1|	92.46	1379	98	3	1	1375	1	1377	0	2587	RNA polymerase beta'' subunit [Megaleranthis saniculifolia]
Cchin_cp-62-mRNA-1	gi|229577745|ref|YP_002836081.1|	97.94	678	13	1	1	678	1	677	0	1372	RNA polymerase beta' subunit [Megaleranthis saniculifolia]
Cchin_cp-9-mRNA-1	gi|229577746|ref|YP_002836082.1|	97.48	1071	26	1	1	1070	1	1071	0	2157	RNA polymerase beta subunit [Megaleranthis saniculifolia]
Cchin_cp-70-mRNA-1	gi|149390435|ref|YP_001294263.1|	96.88	32	1	0	1	32	1	32	2e-12	61.2	cytochrome b6/f complex subunit VIII [Illicium oligandrum]
Cchin_cp-12-mRNA-1	gi|109156586|ref|YP_654205.1|	60.87	69	25	1	1	69	2	68	1e-17	76.6	photosystem II M protein [Oryza sativa Indica Group]
Cchin_cp-69-mRNA-1	gi|114329963|ref|YP_740645.1|	100	353	0	0	1	353	1	353	0	718	photosystem II protein D2 [Nandina domestica]
Cchin_cp-28-mRNA-1	gi|374974643|gb|AFA27415.1|	98.15	486	9	0	1	486	1	486	0	964	photosystem II CP43 chlorophyll apoprotein, partial [Asparagus officinalis]
Cchin_cp-35-mRNA-1	gi|114107043|ref|YP_740199.1|	100	62	0	0	1	62	1	62	2e-32	114	photosystem II protein Z [Liriodendron tulipifera]
Cchin_cp-30-mRNA-1	gi|359422259|ref|YP_004935664.1|	96	100	4	0	1	100	1	100	2e-65	201	rps14 gene product (chloroplast) [Sesamum indicum]
Cchin_cp-72-mRNA-1	gi|229577753|ref|YP_002836089.1|	99.86	734	1	0	1	734	1	734	0	1485	photosystem I P700 apoprotein A2 [Megaleranthis saniculifolia]
Cchin_cp-50-mRNA-1	gi|229577754|ref|YP_002836090.1|	100	750	0	0	1	750	1	750	0	1519	photosystem I P700 apoprotein A1 [Megaleranthis saniculifolia]
Cchin_cp-46-mRNA-1	gi|69216733|gb|AAZ03964.1|	98.24	170	2	1	1	169	1	170	2e-119	343	Ycf3 [Ranunculus macranthus]
Cchin_cp-60-mRNA-1	gi|229577756|ref|YP_002836092.1|	96.52	201	7	0	1	201	1	201	3e-137	391	ribosomal protein S4 [Megaleranthis saniculifolia]
Cchin_cp-26-mRNA-1	gi|122893993|ref|YP_001004189.1|	98.1	158	3	0	1	158	1	158	6e-112	323	NADH-plastoquinone oxidoreductase subunit J [Ranunculus macranthus]
Cchin_cp-54-mRNA-1	gi|511369827|gb|AGN73984.1|	96.04	227	9	0	1	227	1	227	3e-162	456	NADH dehydrogenase subunit K (chloroplast) (chloroplast) [Aconitum barbatum var. puberulum]
Cchin_cp-59-mRNA-1	gi|149390273|ref|YP_001294103.1|	97.5	120	3	0	1	120	1	120	6e-77	231	NADH-plastoquinone oxidoreductase subunit 3 [Chloranthus spicatus]
Cchin_cp-2-mRNA-1	gi|229577760|ref|YP_002836096.1|	97.74	133	3	0	1	133	1	133	8e-87	258	ATP synthase CF1 epsilon subunit [Megaleranthis saniculifolia]
Cchin_cp-58-mRNA-1	gi|229577761|ref|YP_002836097.1|	98.59	498	7	0	1	498	1	498	0	994	ATP synthase CF1 beta subunit [Megaleranthis saniculifolia]
Cchin_cp-24-mRNA-1	gi|11323479|gb|AAG34312.1|	99.16	475	4	0	1	475	1	475	0	983	ribulose-1,5-bisphosphate carboxylase/oxygenase large subunit (chloroplast) [Caltha novae-zelandiae]
Cchin_cp-13-mRNA-1	gi|511369832|gb|AGN73989.1|	90.06	483	41	2	1	476	1	483	0	887	acetyl-CoA carboxylase beta subunit (chloroplast) (chloroplast) [Aconitum barbatum var. puberulum]
Cchin_cp-1-mRNA-1	gi|122894000|ref|YP_001004196.1|	97.22	36	1	0	1	36	1	36	3e-16	70.9	photosystem I subunit VIII [Ranunculus macranthus]
Cchin_cp-91-mRNA-1	gi|122894001|ref|YP_001004197.1|	94.02	184	11	0	1	184	1	184	3e-123	354	photosystem I assembly protein ycf4 [Ranunculus macranthus]
Cchin_cp-80-mRNA-1	gi|313199714|ref|YP_004021328.1|	86.03	229	32	0	1	229	1	229	3e-144	411	chloroplast envelope membrane protein [Theobroma cacao]
Cchin_cp-47-mRNA-1	gi|114329981|ref|YP_740663.1|	93.6	203	13	0	1	203	1	203	2e-134	394	cytochrome f [Nandina domestica]
Cchin_cp-16-mRNA-1	gi|122894004|ref|YP_001004200.1|	100	40	0	0	1	40	1	40	3e-18	76.3	photosystem II protein J [Ranunculus macranthus]
Cchin_cp-49-mRNA-1	gi|7525048|ref|NP_051074.1|	100	38	0	0	1	38	1	38	1e-18	77	photosystem II protein L [Arabidopsis thaliana]
Cchin_cp-44-mRNA-1	gi|7525049|ref|NP_051075.1|	100	39	0	0	1	39	1	39	3e-20	81.3	photosystem II protein VI [Arabidopsis thaliana]
Cchin_cp-71-mRNA-1	gi|122894007|ref|YP_001004203.1|	100	83	0	0	1	83	1	83	3e-53	169	photosystem II cytochrome b559 alpha subunit [Ranunculus macranthus]
Cchin_cp-55-mRNA-1	gi|290489266|gb|ADD31017.1|	100	31	0	0	1	31	1	31	5e-12	59.7	cytochrome b6/f complex subunit VI protein (chloroplast) [Gunnera manicata]
Cchin_cp-81-mRNA-1	gi|114329987|ref|YP_740669.1|	100	37	0	0	1	37	1	37	1e-16	72	cytochrome b6/f complex subunit V [Nandina domestica]
Cchin_cp-38-mRNA-1	gi|511369843|gb|AGN74000.1|	100	44	0	0	1	44	1	44	5e-23	89	photosystem I subunit IX (chloroplast) (chloroplast) [Aconitum barbatum var. puberulum]
Cchin_cp-39-mRNA-1	gi|229577775|ref|YP_002836111.1|	95.45	66	3	0	1	66	1	66	6e-38	128	ribosomal protein L33 [Megaleranthis saniculifolia]
Cchin_cp-43-mRNA-1	gi|229577776|ref|YP_002836112.1|	98.02	101	2	0	1	101	1	101	3e-62	193	ribosomal protein S18 [Megaleranthis saniculifolia]
Cchin_cp-19-mRNA-1	gi|334701642|ref|YP_004564027.1|	85.47	117	17	0	1	117	1	117	5e-63	196	ribosomal protein L20 [Olea woodiana subsp. woodiana]
Cchin_cp-6-mRNA-1	gi|552546114|ref|YP_008592664.1|	100	43	0	0	1	43	1	43	3e-22	86.7	ribosomal protein S12 (chloroplast) [Berberis bealei]
Cchin_cp-7-mRNA-1	gi|114329994|ref|YP_740675.1|	91.54	201	16	1	1	201	1	200	2e-133	382	clp protease proteolytic subunit [Nandina domestica]
Cchin_cp-88-mRNA-1	gi|157689773|gb|ABV65498.1|	98.82	508	6	0	1	508	1	508	0	1019	photosystem II CP47 chlorophyll apoprotein (chloroplast) [Heuchera sanguinea]
Cchin_cp-27-mRNA-1	gi|309322473|ref|YP_003933987.1|	94.74	38	2	0	1	38	1	38	1e-16	72	photosystem II protein T [Eucalyptus grandis]
Cchin_cp-67-mRNA-1	gi|31247828|gb|AAO66182.1|	97.73	44	1	0	40	83	1	44	2e-23	92	photosystem II subunit [Salicornia europaea]
Cchin_cp-11-mRNA-1	gi|364284013|ref|YP_004940538.1|	92.31	78	6	0	1	78	2	79	4e-44	145	psbH gene product (chloroplast) [Boea hygrometrica]
Cchin_cp-14-mRNA-1	gi|604300924|gb|EYU20658.1|	50.79	63	28	1	136	198	7	66	4e-11	63.2	hypothetical protein MIMGU_mgv11b019547mg, partial [Erythranthe guttata]
Cchin_cp-61-mRNA-1	gi|552546121|ref|YP_008592671.1|	98.34	181	3	0	1	181	1	181	1e-124	357	cytochrome b6/f complex subunit IV (chloroplast) [Berberis bealei]
Cchin_cp-3-mRNA-1	gi|511369854|gb|AGN74011.1|	93.13	335	23	0	1	335	1	335	0	643	RNA polymerase alpha subunit (chloroplast) (chloroplast) [Aconitum barbatum var. puberulum]
Cchin_cp-92-mRNA-1	gi|511369855|gb|AGN74012.1|	98.55	138	2	0	1	138	1	138	2e-91	270	ribosomal protein S11 (chloroplast) (chloroplast) [Aconitum barbatum var. puberulum]
Cchin_cp-83-mRNA-1	gi|7525067|ref|NP_051092.1|	100	37	0	0	1	37	1	37	1e-16	72	ribosomal protein L36 [Arabidopsis thaliana]
Cchin_cp-77-mRNA-1	gi|114330004|ref|YP_740685.1|	93.51	77	5	0	1	77	1	77	3e-44	145	translational initiation factor 1 [Nandina domestica]
Cchin_cp-74-mRNA-1	gi|511369857|gb|AGN74014.1|	96.21	132	5	0	1	132	1	132	8e-87	258	ribosomal protein S8 (chloroplast) (chloroplast) [Aconitum barbatum var. puberulum]
Cchin_cp-17-mRNA-1	gi|229577791|ref|YP_002836127.1|	99.18	122	1	0	1	122	1	122	3e-82	245	ribosomal protein L14 [Megaleranthis saniculifolia]
Cchin_cp-56-mRNA-1	gi|229577792|ref|YP_002836128.1|	96.21	132	5	0	1	132	3	134	1e-86	257	ribosomal protein L16 [Megaleranthis saniculifolia]
Cchin_cp-65-mRNA-1	gi|511369859|gb|AGN74016.1|	95.87	218	9	0	1	218	1	218	1e-150	427	ribosomal protein S3 (chloroplast) (chloroplast) [Aconitum barbatum var. puberulum]
Cchin_cp-29-mRNA-1	gi|511369860|gb|AGN74017.1|	93.92	181	9	1	1	181	1	179	3e-123	354	ribosomal protein L22 (chloroplast) (chloroplast) [Aconitum barbatum var. puberulum]
Cchin_cp-66-mRNA-1	gi|229577795|ref|YP_002836131.1|	97.8	91	2	0	1	91	1	91	2e-59	185	ribosomal protein S19 [Megaleranthis saniculifolia]
Cchin_cp-63-mRNA-1	gi|225544186|ref|YP_002720176.1|	96.15	286	11	0	1	286	2	287	0	552	rpl2 [Jatropha curcas]
Cchin_cp-79-mRNA-1	gi|114330012|ref|YP_740693.1|	100	93	0	0	1	93	1	93	1e-62	193	ribosomal protein L23 [Nandina domestica]
Cchin_cp-85-mRNA-1	gi|229577798|ref|YP_002836134.1|	95.81	1433	38	6	1	1418	863	2288	0	2727	hypothetical chloroplast RF2 [Megaleranthis saniculifolia]
Cchin_cp-53-mRNA-1	gi|325610367|gb|ADZ36339.1|	89.02	82	9	0	1	82	1	82	2e-45	149	hypothetical protein RF15 [Franklinia alatamaha]
Cchin_cp-41-mRNA-1	gi|552546135|ref|YP_008592685.1|	97.79	544	9	1	1	541	1	544	0	976	NADH-plastoquinone oxidoreductase subunit 2 (chloroplast) [Berberis bealei]
Cchin_cp-22-mRNA-1	gi|122894034|ref|YP_001004230.1|	100	155	0	0	1	155	1	155	4e-109	316	ribosomal protein S7 [Ranunculus macranthus]
Cchin_cp-42-mRNA-1	gi|394831161|ref|YP_006503815.1|	95.1	102	5	0	1	102	36	137	4e-61	191	ribosomal protein S12 (chloroplast) [Datura stramonium]
Cchin_cp-84-mRNA-1	gi|229577812|ref|YP_002836148.1|	89.61	462	45	2	1	459	1	462	0	844	hypothetical chloroplast RF1 [Megaleranthis saniculifolia]
Cchin_cp-76-mRNA-1	gi|511369869|gb|AGN74026.1|	91.76	510	42	0	1	510	1	510	0	957	NADH dehydrogenase subunit 5 (chloroplast) (chloroplast) [Aconitum barbatum var. puberulum]
Cchin_cp-10-mRNA-1	gi|229577802|ref|YP_002836138.1|	94.74	57	3	0	1	57	1	57	3e-29	105	ribosomal protein L32 [Megaleranthis saniculifolia]
Cchin_cp-18-mRNA-1	gi|511369870|gb|AGN74027.1|	89.78	323	33	0	1	323	1	323	0	595	cytochrome c biogenesis protein (chloroplast) (chloroplast) [Aconitum barbatum var. puberulum]
Cchin_cp-82-mRNA-1	gi|122894043|ref|YP_001004239.1|	91.02	501	43	1	1	499	2	502	0	919	NADH-plastoquinone oxidoreductase subunit 4 [Ranunculus macranthus]
Cchin_cp-33-mRNA-1	gi|502182490|ref|XP_004516946.1|	95.06	81	4	0	1	81	1	81	8e-54	183	PREDICTED: NAD(P)H-quinone oxidoreductase chain 4, chloroplastic-like [Cicer arietinum]
Cchin_cp-37-mRNA-1	gi|408904266|gb|AFU96706.1|	91.09	101	9	0	1	101	1	101	2e-53	171	NdhE, partial (chloroplast) [Podocalyx loranthoides]
Cchin_cp-23-mRNA-1	gi|511369874|gb|AGN74031.1|	95.48	177	8	0	1	177	1	177	4e-115	333	NADH dehydrogenase subunit 6 (chloroplast) (chloroplast) [Aconitum barbatum var. puberulum]
Cchin_cp-40-mRNA-1	gi|114330024|ref|YP_740705.1|	95.56	180	8	0	1	180	1	180	1e-126	362	NADH-plastoquinone oxidoreductase subunit I [Nandina domestica]
Cchin_cp-75-mRNA-1	gi|511369876|gb|AGN74033.1|	94.23	364	20	1	1	364	1	363	0	657	NADH dehydrogenase subunit 1 (chloroplast) (chloroplast) [Aconitum barbatum var. puberulum]
Cchin_cp-4-mRNA-1	gi|122894037|ref|YP_001004233.1|	97.46	393	10	0	1	393	1	393	0	794	NADH-plastoquinone oxidoreductase subunit 7 [Ranunculus macranthus]
Cchin_cp-51-mRNA-1	gi|568244967|ref|YP_008963749.1|	95.35	86	4	0	1	86	1	86	5e-52	166	ribosomal protein S15 (chloroplast) [Liquidambar formosana]
Cchin_cp-31-mRNA-1	gi|229577812|ref|YP_002836148.1|	74.53	1174	252	14	1	1149	1	1152	0	1670	hypothetical chloroplast RF1 [Megaleranthis saniculifolia]
Cchin_cp-86-mRNA-1	gi|394831161|ref|YP_006503815.1|	95.1	102	5	0	1	102	36	137	4e-61	191	ribosomal protein S12 (chloroplast) [Datura stramonium]
Cchin_cp-90-mRNA-1	gi|122894034|ref|YP_001004230.1|	100	155	0	0	1	155	1	155	4e-109	316	ribosomal protein S7 [Ranunculus macranthus]
Cchin_cp-36-mRNA-1	gi|552546135|ref|YP_008592685.1|	97.61	544	9	1	1	540	1	544	0	973	NADH-plastoquinone oxidoreductase subunit 2 (chloroplast) [Berberis bealei]
Cchin_cp-57-mRNA-1	gi|325610367|gb|ADZ36339.1|	87.95	83	9	1	1	83	1	82	9e-44	145	hypothetical protein RF15 [Franklinia alatamaha]
Cchin_cp-52-mRNA-1	gi|229577798|ref|YP_002836134.1|	95.81	1433	38	6	1	1418	863	2288	0	2727	hypothetical chloroplast RF2 [Megaleranthis saniculifolia]
Cchin_cp-15-mRNA-1	gi|114330012|ref|YP_740693.1|	100	93	0	0	1	93	1	93	1e-62	193	ribosomal protein L23 [Nandina domestica]
Cchin_cp-89-mRNA-1	gi|573462018|emb|CCQ71687.1|	96.84	285	9	0	1	285	2	286	0	556	ribosomal protein L2 (chloroplast) [Salvia miltiorrhiza]
Cchin_cp-48-mRNA-1	gi|229577795|ref|YP_002836131.1|	91.67	36	3	0	1	36	1	36	5e-16	71.6	ribosomal protein S19 [Megaleranthis saniculifolia]

## Sheet: Table S5
Table S5: Best hits with KEGG database of proteins in goldthread chloroplast genome.
Sequences	keggID	percIdentity	alnLength	mismatchCount	gapOpenCount	queryStart	queryEnd	subjectStart	subjectEnd	eVal	bitScore	keggAnnotation
Cchin_cp-78-mRNA-1	pop:Poptr_cp001	99.15	353	3	0	1	353	1	353	0	711	psbA; photosystem II protein D1; K02703 photosystem II P680 reaction center D1 protein
Cchin_cp-64-mRNA-1	vvi:4025122	88	75	9	0	2	76	13	87	3e-43	138	rps16; ribosomal protein S16; K02959 small subunit ribosomal protein S16
Cchin_cp-45-mRNA-1	vvi:4025108	90.16	61	6	0	1	61	1	61	4e-31	106	psbK; PSII K protein; K02712 photosystem II PsbK protein
Cchin_cp-73-mRNA-1	zma:845206	97.22	36	1	0	17	52	1	36	1e-17	70.9	psbI; photosystem II protein I; K02710 photosystem II PsbI protein
Cchin_cp-34-mRNA-1	vvi:4025114	95.65	506	22	0	1	506	1	506	0	984	atpA; ATP synthase CF1 alpha subunit; K02111 F-type H+-transporting ATPase subunit alpha [EC:3.6.3.14]
Cchin_cp-8-mRNA-1	pop:Poptr_cp006	89.19	185	19	1	1	185	1	184	3e-117	334	atpF; ATP synthase CF0 B subunit (EC:3.6.3.14); K02109 F-type H+-transporting ATPase subunit b [EC:3.6.3.14]
Cchin_cp-87-mRNA-1	vvi:4025116	100	81	0	0	1	81	1	81	2e-48	152	atpH; ATPase III subunit; K02110 F-type H+-transporting ATPase subunit c [EC:3.6.3.14]
Cchin_cp-21-mRNA-1	vvi:4025095	96.36	247	9	0	1	247	1	247	7e-165	461	atpI; ATPase IV subunit; K02108 F-type H+-transporting ATPase subunit a [EC:3.6.3.14]
Cchin_cp-20-mRNA-1	vvi:4025096	95.74	235	10	0	1	235	1	235	1e-169	472	rps2; 30S ribosomal protein S2; K02967 small subunit ribosomal protein S2
Cchin_cp-32-mRNA-1	vvi:4025097	83.89	1384	214	3	1	1375	5	1388	0	2355	rpoC2; RNA polymerase beta'' chain; K03046 DNA-directed RNA polymerase subunit beta' [EC:2.7.7.6]
Cchin_cp-62-mRNA-1	ath:ArthCp013	91.3	678	58	1	1	678	1	677	0	1288	rpoC1; RNA polymerase beta' chain; K03046 DNA-directed RNA polymerase subunit beta' [EC:2.7.7.6]
Cchin_cp-9-mRNA-1	vvi:4025099	93.93	1070	65	0	1	1070	1	1070	0	2058	rpoB; RNA polymerase beta chain; K03043 DNA-directed RNA polymerase subunit beta [EC:2.7.7.6]
Cchin_cp-70-mRNA-1	sbi:SobiCp011	100	29	0	0	4	32	1	29	2e-12	56.2	petN; cytochrome b6/f complex subunit VIII; K03689 cytochrome b6-f complex subunit 8
Cchin_cp-69-mRNA-1	pop:Poptr_cp016	99.43	353	2	0	1	353	1	353	0	715	psbD; photosystem II protein D2; K02706 photosystem II P680 reaction center D2 protein
Cchin_cp-28-mRNA-1	vvi:4025084	97.67	473	11	0	14	486	1	473	0	913	psbC; PSII 43 kDa protein; K02705 photosystem II CP43 chlorophyll apoprotein
Cchin_cp-35-mRNA-1	vvi:4025086	95.16	62	3	0	1	62	1	62	1e-32	110	psbZ; photosystem II reaction center Z protein; K02724 photosystem II PsbZ protein
Cchin_cp-30-mRNA-1	pop:Poptr_cp020	92	100	8	0	1	100	1	100	2e-63	191	rps14; ribosomal protein S14; K02954 small subunit ribosomal protein S14
Cchin_cp-72-mRNA-1	vvi:4025090	98.64	734	10	0	1	734	1	734	0	1469	psaB; photosystem I P700 chlorophyll a apoprotein A2; K02690 photosystem I P700 chlorophyll a apoprotein A2
Cchin_cp-50-mRNA-1	vvi:4025091	98.4	750	12	0	1	750	1	750	0	1501	psaA; photosystem I P700 chlorophyll a apoprotein A1; K02689 photosystem I P700 chlorophyll a apoprotein A1
Cchin_cp-60-mRNA-1	pop:Poptr_cp024	89.55	201	21	0	1	201	1	201	2e-127	362	rps4; ribosomal protein S4; K02986 small subunit ribosomal protein S4
Cchin_cp-26-mRNA-1	vvi:4025141	96.2	158	6	0	1	158	1	158	1e-111	318	ndhJ; NADH dehydrogenase 30 kDa subunit; K05581 NADH dehydrogenase I subunit J [EC:1.6.5.3]
Cchin_cp-54-mRNA-1	vvi:4025142	92.95	227	14	1	1	227	1	225	4e-154	431	ndhK; NADH dehydrogenase 27 kDa subunit; K05582 NADH dehydrogenase I subunit K [EC:1.6.5.3]
Cchin_cp-59-mRNA-1	vvi:4025143	93.33	120	8	0	1	120	1	120	2e-74	221	ndhC, ndh3; NADH dehydrogenase subunit 3; K05574 NADH dehydrogenase I subunit 3 [EC:1.6.5.3]
Cchin_cp-2-mRNA-1	vvi:4025007	90.23	133	13	0	1	133	1	133	4e-83	244	atpE; ATP synthase epsilon chain; K02114 F-type H+-transporting ATPase subunit epsilon [EC:3.6.3.14]
Cchin_cp-58-mRNA-1	vvi:4025008	97.39	498	13	0	1	498	1	498	0	960	atpB; ATP synthase CF1 beta subunit; K02112 F-type H+-transporting ATPase subunit beta [EC:3.6.3.14]
Cchin_cp-24-mRNA-1	pop:Poptr_cp030	96.84	475	15	0	1	475	1	475	0	939	rbcL; ribulose-1,5-bisphosphate carboxylase/oxygenase large subunit (EC:4.1.1.39); K01601 ribulose-bisphosphate carboxylase large chain [EC:4.1.1.39]
Cchin_cp-13-mRNA-1	rcu:RCOM_1655340	60.82	342	68	3	137	476	404	681	4e-127	389	hypothetical protein; K01601 ribulose-bisphosphate carboxylase large chain [EC:4.1.1.39]
Cchin_cp-1-mRNA-1	zma:845197	83.33	36	6	0	1	36	1	36	6e-14	60.5	psaI; psaI; K02696 photosystem I subunit VIII
Cchin_cp-47-mRNA-1	vvi:4025050	88.67	203	21	1	1	203	1	201	5e-129	375	petA; apocytochrome f precursor; K02634 apocytochrome f
Cchin_cp-16-mRNA-1	ath:ArthCp036	95	40	2	0	1	40	1	40	2e-19	74.7	psbJ; photosystem II reaction center subunit X; K02711 photosystem II PsbJ protein
Cchin_cp-49-mRNA-1	ath:ArthCp037	100	38	0	0	1	38	1	38	2e-20	77	psbL; PSII reaction center subunit XII; K02713 photosystem II PsbL protein
Cchin_cp-44-mRNA-1	vvi:4025053	100	39	0	0	1	39	1	39	5e-22	81.3	psbF; photosystem II reaction center subunit VI; K02708 photosystem II cytochrome b559 subunit beta
Cchin_cp-71-mRNA-1	vvi:4025054	96.39	83	3	0	1	83	1	83	2e-52	162	psbE; cytochrome b559 alpha subunit; K02707 photosystem II cytochrome b559 subunit alpha
Cchin_cp-81-mRNA-1	zma:845194	97.3	37	1	0	1	37	1	37	6e-18	70.9	petG; cytochrome B6-F complex subunit 5; K02640 cytochrome b6-f complex subunit 5
Cchin_cp-38-mRNA-1	ath:ArthCp042	97.73	44	1	0	1	44	1	44	2e-24	87.8	psaJ; photosystem I subunit IX; K02697 photosystem I subunit IX
Cchin_cp-39-mRNA-1	ath:ArthCp043	86.36	66	9	0	1	66	1	66	2e-36	119	rpl33; ribosomal protein L33; K02913 large subunit ribosomal protein L33
Cchin_cp-43-mRNA-1	vvi:4025061	93.07	101	7	0	1	101	1	101	3e-58	178	rps18; 30S ribosomal protein S18; K02963 small subunit ribosomal protein S18
Cchin_cp-19-mRNA-1	ath:ArthCp045	76.07	117	28	0	1	117	1	117	2e-57	177	rpl20; 50S ribosomal protein L20; K02887 large subunit ribosomal protein L20
Cchin_cp-6-mRNA-1	ath:ArthCp047	97.37	38	1	0	1	38	1	38	3e-20	79	rps12; ribosomal protein S12; K02950 small subunit ribosomal protein S12
Cchin_cp-7-mRNA-1	vvi:4025124	81.73	197	35	1	1	197	1	196	2e-120	344	clpP; ATP-dependent Clp protease proteolytic subunit; K01358 ATP-dependent Clp protease, protease subunit [EC:3.4.21.92]
Cchin_cp-88-mRNA-1	vvi:4025125	97.64	508	12	0	1	508	1	508	0	989	psbB; photosystem II P680 chlorophyll A apoprotein; K02704 photosystem II CP47 chlorophyll apoprotein
Cchin_cp-27-mRNA-1	osa:3131475	97.14	35	1	0	4	38	1	35	9e-17	67.8	psbT, OrsajCp054; ORF35; K02718 photosystem II PsbT protein
Cchin_cp-67-mRNA-1	ath:ArthCp051	100	43	0	0	41	83	1	43	7e-25	91.3	psbN; photosystem II reaction center N protein; K02715 PsbN protein
Cchin_cp-11-mRNA-1	vvi:4025128	88.46	78	9	0	1	78	2	79	1e-44	142	psbH; photosystem II reaction center protein H; K02709 photosystem II PsbH protein
Cchin_cp-61-mRNA-1	pop:POPTR_588640	98.88	178	2	0	1	178	1	178	4e-124	352	hypothetical protein; K02637 cytochrome b6-f complex subunit 4
Cchin_cp-3-mRNA-1	vvi:4025131	84.59	331	51	0	1	331	1	331	0	582	rpoA; RNA polymerase alpha chain; K03040 DNA-directed RNA polymerase subunit alpha [EC:2.7.7.6]
Cchin_cp-92-mRNA-1	vvi:4025132	94.2	138	8	0	1	138	1	138	4e-89	259	rps11; 30S ribosomal protein S11; K02948 small subunit ribosomal protein S11
Cchin_cp-83-mRNA-1	ath:ArthCp057	100	37	0	0	1	37	1	37	2e-18	72	rpl36; 50S ribosomal protein L36; K02919 large subunit ribosomal protein L36
Cchin_cp-77-mRNA-1	vvi:4025134	87.01	77	10	0	1	77	1	77	5e-44	140	infA; translation initiation factor 1; K02518 translation initiation factor IF-1
Cchin_cp-74-mRNA-1	vvi:4025135	86.57	134	16	1	1	132	1	134	9e-78	230	rps8; 30S ribosomal protein S8; K02994 small subunit ribosomal protein S8
Cchin_cp-17-mRNA-1	vvi:4025019	92.62	122	9	0	1	122	1	122	1e-79	234	rpl14; 50S ribosomal protein L14; K02874 large subunit ribosomal protein L14
Cchin_cp-56-mRNA-1	vvi:4025020	90.91	132	12	0	1	132	3	134	6e-84	246	rpl16; ribosomal protein L16; K02878 large subunit ribosomal protein L16
Cchin_cp-65-mRNA-1	vvi:4025021	88.99	218	24	0	1	218	1	218	5e-142	400	rps3; 30S ribosomal protein S3; K02982 small subunit ribosomal protein S3
Cchin_cp-29-mRNA-1	vvi:4025022	68.97	145	40	1	8	147	9	153	4e-66	203	rpl22; ribosomal protein L22; K02890 large subunit ribosomal protein L22
Cchin_cp-66-mRNA-1	pop:POPTR_748250	91.21	91	8	0	1	91	1	91	7e-56	171	hypothetical protein; K02965 small subunit ribosomal protein S19
Cchin_cp-63-mRNA-1	vvi:4025024	92.66	286	8	1	1	286	2	274	0	519	rpl2; 50S ribosomal protein L2; K02886 large subunit ribosomal protein L2
Cchin_cp-79-mRNA-1	vvi:4025136	98.92	93	1	0	1	93	1	93	1e-63	191	rpl23; 50S ribosomal protein L23; K02892 large subunit ribosomal protein L23
Cchin_cp-41-mRNA-1	vvi:4025014	92.24	541	11	1	1	541	1	510	0	895	ndhB, ndh2; NADH dehydrogenase subunit 2; K05573 NADH dehydrogenase I subunit 2 [EC:1.6.5.3]
Cchin_cp-22-mRNA-1	ath:ArthCp088	99.35	155	1	0	1	155	1	155	2e-110	315	rps7; 30S ribosomal protein S7; K02992 small subunit ribosomal protein S7
Cchin_cp-42-mRNA-1	ath:ArthCp047	100	77	0	0	23	99	39	115	1e-49	157	rps12; ribosomal protein S12; K02950 small subunit ribosomal protein S12
Cchin_cp-76-mRNA-1	vvi:4025035	82.82	518	82	2	1	511	1	518	0	843	ndhF, ndh5; NADH dehydrogenase subunit 5; K05577 NADH dehydrogenase I subunit 5 [EC:1.6.5.3]
Cchin_cp-10-mRNA-1	vvi:7498560	80.7	57	11	0	1	57	1	57	4e-19	75.1	rpl32; ribosomal protein L32; K02911 large subunit ribosomal protein L32
Cchin_cp-82-mRNA-1	vvi:4025039	88.78	499	56	0	1	499	2	500	0	850	ndhD, ndh4; NADH dehydrogenase subunit 4; K05575 NADH dehydrogenase I subunit 4 [EC:1.6.5.3]
Cchin_cp-33-mRNA-1	vvi:4025040	100	81	0	0	1	81	1	81	2e-55	169	psaC; photosystem I iron-sulfur center; K02691 photosystem I subunit VII
Cchin_cp-37-mRNA-1	vvi:4025041	93.07	101	7	0	1	101	1	101	7e-52	162	ndhE, ndh4L; NADH dehydrogenase subunit 4L; K05576 NADH dehydrogenase I subunit 4L [EC:1.6.5.3]
Cchin_cp-23-mRNA-1	vvi:4025042	89.77	176	18	0	1	176	1	176	1e-98	286	ndhG; NADH dehydrogenase subunit 6; K05578 NADH dehydrogenase I subunit 6 [EC:1.6.5.3]
Cchin_cp-40-mRNA-1	vvi:4025043	95.73	164	7	0	1	164	1	164	3e-116	331	ndhI, frxB; NADH dehydrogenase 18 kDa subunit; K05580 NADH dehydrogenase I subunit I [EC:1.6.5.3]
Cchin_cp-75-mRNA-1	pop:Poptr_cp084	86.34	366	47	2	1	364	1	365	0	596	ndhA; NADH dehydrogenase subunit 1 (EC:1.6.5.3); K05572 NADH dehydrogenase I subunit 1 [EC:1.6.5.3]
Cchin_cp-4-mRNA-1	vvi:4025072	94.91	393	20	0	1	393	1	393	0	771	ndhH; NADH dehydrogenase 49 kDa subunit; K05579 NADH dehydrogenase I subunit 7 [EC:1.6.5.3]
Cchin_cp-51-mRNA-1	vvi:4025073	90.7	86	7	1	1	85	1	86	2e-48	152	rps15; ribosomal protein S15; K02956 small subunit ribosomal protein S15
Cchin_cp-86-mRNA-1	ath:ArthCp047	100	77	0	0	23	99	39	115	1e-49	157	rps12; ribosomal protein S12; K02950 small subunit ribosomal protein S12
Cchin_cp-90-mRNA-1	ath:ArthCp088	99.35	155	1	0	1	155	1	155	2e-110	315	rps7; 30S ribosomal protein S7; K02992 small subunit ribosomal protein S7
Cchin_cp-36-mRNA-1	vvi:4025014	92.41	540	11	1	1	540	1	510	0	895	ndhB, ndh2; NADH dehydrogenase subunit 2; K05573 NADH dehydrogenase I subunit 2 [EC:1.6.5.3]
Cchin_cp-15-mRNA-1	vvi:4025136	98.92	93	1	0	1	93	1	93	1e-63	191	rpl23; 50S ribosomal protein L23; K02892 large subunit ribosomal protein L23
Cchin_cp-89-mRNA-1	vvi:4025024	92.98	285	8	1	1	285	2	274	0	520	rpl2; 50S ribosomal protein L2; K02886 large subunit ribosomal protein L2
Cchin_cp-48-mRNA-1	pop:POPTR_748250	77.78	36	8	0	1	36	1	36	1e-12	58.2	hypothetical protein; K02965 small subunit ribosomal protein S19

## Sheet: Table S6
Table S6: Best hits with COG databases of proteins in goldthread chloroplast genome.
Sequences	cogID	percIdentity	alnLength	mismatchCount	gapOpenCount	queryStart	queryEnd	subjectStart	subjectEnd	eVal	bitScore	cogAnnotation
Cchin_cp-64-mRNA-1	ssr0482	51.52	66	32	0	6	71	17	82	4e-17	72	[J] COG0228 Ribosomal protein S16
Cchin_cp-34-mRNA-1	sll1326	72.06	501	140	0	1	501	1	501	0	752	[C] COG0056 F0F1-type ATP synthase, alpha subunit
Cchin_cp-8-mRNA-1	sll1324	26.32	171	125	1	8	178	8	177	2e-15	72.8	[C] COG0711 F0F1-type ATP synthase, subunit b
Cchin_cp-87-mRNA-1	asl0009	94.92	59	3	0	22	80	22	80	4e-32	110	[C] COG0636 F0F1-type ATP synthase, subunit c/Archaeal/vacuolar-type H+-ATPase, subunit K
Cchin_cp-21-mRNA-1	all0010	71.05	228	65	1	17	243	12	239	2e-102	303	[C] COG0356 F0F1-type ATP synthase, subunit a
Cchin_cp-20-mRNA-1	all4792	53.6	222	103	0	8	229	4	225	4e-89	269	[J] COG0052 Ribosomal protein S2
Cchin_cp-32-mRNA-1	sll1789	34.52	843	483	19	7	838	1	785	5e-124	422	[K] COG0086 DNA-directed RNA polymerase, beta' subunit/160 kD subunit
Cchin_cp-62-mRNA-1	alr1595	46.23	664	302	10	10	670	12	623	0	571	[K] COG0086 DNA-directed RNA polymerase, beta' subunit/160 kD subunit
Cchin_cp-9-mRNA-1	alr1594	47.66	1070	520	10	12	1053	27	1084	0	999	[K] COG0085 DNA-directed RNA polymerase, beta subunit/140 kD subunit
Cchin_cp-30-mRNA-1	slr0628	53	100	47	0	1	100	1	100	3e-30	107	[J] COG0199 Ribosomal protein S14
Cchin_cp-46-mRNA-1	slr0823	61.54	169	64	1	1	169	1	168	2e-69	213	[R] COG0457 FOG: TPR repeat
Cchin_cp-60-mRNA-1	slr0469	57.56	205	80	3	1	201	1	202	8e-77	234	[J] COG0522 Ribosomal protein S4 and related proteins
Cchin_cp-26-mRNA-1	all3840	55.77	156	69	0	3	158	20	175	2e-62	194	[C] COG0852 NADH:ubiquinone oxidoreductase 27 kD subunit
Cchin_cp-54-mRNA-1	slr1280	70.74	188	54	1	15	201	34	221	4e-96	286	[C] COG0377 NADH:ubiquinone oxidoreductase 20 kD subunit and related Fe-S oxidoreductases
Cchin_cp-59-mRNA-1	slr1279	62.5	120	45	0	1	120	1	120	2e-49	158	[C] COG0838 NADH:ubiquinone oxidoreductase subunit 3 (chain A)
Cchin_cp-2-mRNA-1	slr1330	45.04	131	69	1	1	128	30	160	2e-36	126	[C] COG0355 F0F1-type ATP synthase, epsilon subunit (mitochondrial delta subunit)
Cchin_cp-58-mRNA-1	all5039	81.51	476	88	0	12	487	2	477	0	797	[C] COG0055 F0F1-type ATP synthase, beta subunit
Cchin_cp-24-mRNA-1	alr1524	85.38	472	69	0	4	475	5	476	0	847	[G] COG1850 Ribulose 1,5-bisphosphate carboxylase, large subunit
Cchin_cp-13-mRNA-1	sll0336	56.92	260	110	2	217	476	32	289	2e-99	306	[I] COG0777 Acetyl-CoA carboxylase beta subunit
Cchin_cp-39-mRNA-1	asl4452	58.46	65	26	1	1	65	1	64	9e-18	73.2	[J] COG0267 Ribosomal protein L33
Cchin_cp-43-mRNA-1	asl4451	55.22	67	30	0	15	81	4	70	1e-19	79.3	[J] COG0238 Ribosomal protein S18
Cchin_cp-19-mRNA-1	alr3428	58.82	102	40	1	1	102	1	100	1e-22	89	[J] COG0292 Ribosomal protein L20
Cchin_cp-6-mRNA-1	sll1096	68.42	38	12	0	1	38	1	38	1e-11	57.4	[J] COG0048 Ribosomal protein S12
Cchin_cp-7-mRNA-1	all4357	53.54	198	90	2	1	198	1	196	9e-71	218	[OU] COG0740 Protease subunit of ATP-dependent Clp proteases
Cchin_cp-61-mRNA-1	alr3422	82.05	156	28	0	19	174	5	160	4e-91	268	[C] COG1290 Cytochrome b subunit of the bc complex
Cchin_cp-3-mRNA-1	all4191	34.05	326	190	4	13	334	4	308	9e-62	204	[K] COG0202 DNA-directed RNA polymerase, alpha subunit/40 kD subunit
Cchin_cp-92-mRNA-1	sll1817	56.45	124	54	0	15	138	7	130	1e-46	152	[J] COG0100 Ribosomal protein S11
Cchin_cp-83-mRNA-1	asl4194	78.38	37	8	0	1	37	1	37	1e-14	63.2	[J] COG0257 Ribosomal protein L36
Cchin_cp-77-mRNA-1	asl4195	55.41	74	32	1	1	73	1	74	3e-21	82.8	[J] COG0361 Translation initiation factor 1 (IF-1)
Cchin_cp-74-mRNA-1	all4202	50.39	129	64	0	4	132	5	133	2e-42	141	[J] COG0096 Ribosomal protein S8
Cchin_cp-17-mRNA-1	all4205	68.85	122	38	0	1	122	1	122	9e-60	184	[J] COG0093 Ribosomal protein L14
Cchin_cp-56-mRNA-1	sll1805	72.31	130	36	0	1	130	3	132	7e-68	206	[J] COG0197 Ribosomal protein L16/L10E
Cchin_cp-65-mRNA-1	all4209	44.7	217	116	2	1	217	1	213	2e-53	176	[J] COG0092 Ribosomal protein S3
Cchin_cp-29-mRNA-1	sll1803	49.17	120	61	0	1	120	1	120	6e-38	131	[J] COG0091 Ribosomal protein L22
Cchin_cp-66-mRNA-1	asl4211	65.91	88	30	0	3	90	3	90	5e-41	134	[J] COG0185 Ribosomal protein S19
Cchin_cp-63-mRNA-1	sll1802	54.17	288	115	3	2	286	3	276	2e-102	305	[J] COG0090 Ribosomal protein L2
Cchin_cp-79-mRNA-1	sll1801	36.9	84	53	0	2	85	12	95	3e-14	65.5	[J] COG0089 Ribosomal protein L23
Cchin_cp-41-mRNA-1	all4883	46.97	511	237	3	32	540	15	493	5e-150	446	[C] COG1007 NADH:ubiquinone oxidoreductase subunit 2 (chain N)
Cchin_cp-22-mRNA-1	all4339	56.13	155	68	0	1	155	1	155	8e-61	189	[J] COG0049 Ribosomal protein S7
Cchin_cp-42-mRNA-1	sll1096	93.51	77	5	0	23	99	39	115	2e-47	152	[J] COG0048 Ribosomal protein S12
Cchin_cp-76-mRNA-1	slr0844	56.14	472	200	1	1	472	1	465	6e-177	519	[CP] COG1009 NADH:ubiquinone oxidoreductase subunit 5 (chain L)/Multisubunit Na+/H+ antiporter, MnhA subunit
Cchin_cp-10-mRNA-1	asl3674	55.81	43	19	0	1	43	1	43	1e-07	45.8	[J] COG0333 Ribosomal protein L32
Cchin_cp-18-mRNA-1	all0936	41.93	353	167	4	1	318	1	350	2e-81	256	[O] COG0755 ABC-type transport system involved in cytochrome c biogenesis, permease component
Cchin_cp-82-mRNA-1	alr3957	55.58	484	213	2	2	484	5	487	0	553	[C] COG1008 NADH:ubiquinone oxidoreductase subunit 4 (chain M)
Cchin_cp-33-mRNA-1	asr3463	88.89	81	9	0	1	81	1	81	7e-50	156	[C] COG1145 Ferredoxin
Cchin_cp-37-mRNA-1	sll0522	58	100	42	0	1	100	3	102	2e-23	90.1	[C] COG0713 NADH:ubiquinone oxidoreductase subunit 11 or 4L (chain K)
Cchin_cp-23-mRNA-1	sll0521	39.2	176	99	2	1	176	1	168	1e-28	108	[C] COG0839 NADH:ubiquinone oxidoreductase subunit 6 (chain J)
Cchin_cp-40-mRNA-1	alr0224	61.27	173	67	0	1	173	1	173	8e-79	238	[C] COG1143 Formate hydrogenlyase subunit 6/NADH:ubiquinone oxidoreductase 23 kD subunit (chain I)
Cchin_cp-75-mRNA-1	sll0519	56.63	362	150	3	3	361	7	364	4e-145	421	[C] COG1005 NADH:ubiquinone oxidoreductase subunit 1 (chain H)
Cchin_cp-4-mRNA-1	alr3355	72.24	389	107	1	6	393	6	394	0	618	[C] COG0649 NADH:ubiquinone oxidoreductase 49 kD subunit 7
Cchin_cp-51-mRNA-1	FN1979	50	70	35	0	13	82	15	84	2e-16	70.9	[J] COG0184 Ribosomal protein S15P/S13E
Cchin_cp-86-mRNA-1	sll1096	93.51	77	5	0	23	99	39	115	2e-47	152	[J] COG0048 Ribosomal protein S12
Cchin_cp-90-mRNA-1	all4339	56.13	155	68	0	1	155	1	155	8e-61	189	[J] COG0049 Ribosomal protein S7
Cchin_cp-36-mRNA-1	all4883	47.06	510	237	3	32	539	15	493	3e-150	446	[C] COG1007 NADH:ubiquinone oxidoreductase subunit 2 (chain N)
Cchin_cp-15-mRNA-1	sll1801	36.9	84	53	0	2	85	12	95	3e-14	65.5	[J] COG0089 Ribosomal protein L23
Cchin_cp-89-mRNA-1	sll1802	54.01	287	116	3	2	285	3	276	4e-102	305	[J] COG0090 Ribosomal protein L2
Cchin_cp-48-mRNA-1	asl4211	63.89	36	13	0	1	36	1	36	6e-09	49.3	[J] COG0185 Ribosomal protein S19

## Sheet: Table S7
Table S7: Best hits with COG database of chloroplast proteins from golthread and the other species.
Sequences	cogID	percIdentity	alnLength	mismatchCount	gapOpenCount	queryStart	queryEnd	subjectStart	subjectEnd	eVal	bitScore	cogAnnotation
YP_740629.1	sll1096	82.93	123	21	0	1	123	1	123	6e-71	213	[J] COG0048 Ribosomal protein S12
YP_740632.1	ssr0482	52.5	80	38	0	1	80	1	80	2e-23	89	[J] COG0228 Ribosomal protein S16
YP_740635.1	sll1326	71.86	501	141	0	1	501	1	501	0	748	[C] COG0056 F0F1-type ATP synthase, alpha subunit
YP_740636.1	sll1324	25.99	177	131	0	1	177	1	177	4e-17	77.4	[C] COG0711 F0F1-type ATP synthase, subunit b
YP_740637.1	asl0009	94.92	59	3	0	22	80	22	80	4e-32	110	[C] COG0636 F0F1-type ATP synthase, subunit c/Archaeal/vacuolar-type H+-ATPase, subunit K
YP_740638.1	all0010	69.74	228	68	1	17	243	12	239	2e-100	298	[C] COG0356 F0F1-type ATP synthase, subunit a
YP_740639.1	all4792	53.15	222	104	0	8	229	4	225	3e-90	272	[J] COG0052 Ribosomal protein S2
YP_740640.1	sll1789	35.14	851	463	24	7	834	1	785	7e-128	433	[K] COG0086 DNA-directed RNA polymerase, beta' subunit/160 kD subunit
YP_740641.1	alr1595	46.15	663	303	9	10	669	12	623	0	566	[K] COG0086 DNA-directed RNA polymerase, beta' subunit/160 kD subunit
YP_740642.1	alr1594	47.48	1070	522	10	12	1053	27	1084	0	998	[K] COG0085 DNA-directed RNA polymerase, beta subunit/140 kD subunit
YP_740648.1	slr0628	53	100	47	0	1	100	1	100	2e-31	110	[J] COG0199 Ribosomal protein S14
YP_740651.1	slr0823	63.1	168	62	0	1	168	1	168	7e-74	224	[R] COG0457 FOG: TPR repeat
YP_740652.1	slr0469	58.05	205	79	3	1	201	1	202	2e-79	241	[J] COG0522 Ribosomal protein S4 and related proteins
YP_740653.1	all3840	55.77	156	69	0	3	158	20	175	4e-63	196	[C] COG0852 NADH:ubiquinone oxidoreductase 27 kD subunit
YP_740654.2	all3841	69.07	194	60	0	1	194	16	209	1e-97	290	[C] COG0377 NADH:ubiquinone oxidoreductase 20 kD subunit and related Fe-S oxidoreductases
YP_740655.1	slr1279	65	120	42	0	1	120	1	120	3e-51	162	[C] COG0838 NADH:ubiquinone oxidoreductase subunit 3 (chain A)
YP_740656.1	slr1330	45.04	131	69	1	1	128	30	160	1e-35	124	[C] COG0355 F0F1-type ATP synthase, epsilon subunit (mitochondrial delta subunit)
YP_740657.1	all5039	81.51	476	88	0	12	487	2	477	0	794	[C] COG0055 F0F1-type ATP synthase, beta subunit
YP_740658.1	alr1524	84.96	472	71	0	4	475	5	476	0	842	[G] COG1850 Ribulose 1,5-bisphosphate carboxylase, large subunit
YP_740659.1	sll0336	57.2	271	109	3	230	495	32	300	3e-104	320	[I] COG0777 Acetyl-CoA carboxylase beta subunit
YP_740671.1	asl4452	60	65	25	1	1	65	1	64	3e-20	79.3	[J] COG0267 Ribosomal protein L33
YP_740672.1	asl4451	53.73	67	31	0	14	80	4	70	3e-19	78.2	[J] COG0238 Ribosomal protein S18
YP_740673.1	alr3428	57.84	102	41	1	1	102	1	100	8e-23	89.7	[J] COG0292 Ribosomal protein L20
YP_740674.1	sll1096	82.93	123	21	0	1	123	1	123	6e-71	213	[J] COG0048 Ribosomal protein S12
YP_740675.1	all4357	54.31	197	89	1	1	197	1	196	5e-76	232	[OU] COG0740 Protease subunit of ATP-dependent Clp proteases
YP_740680.1	alr3421	82.79	215	37	0	1	215	1	215	2e-134	382	[C] COG1290 Cytochrome b subunit of the bc complex
YP_740681.1	alr3422	80.62	160	31	0	1	160	1	160	1e-92	271	[C] COG1290 Cytochrome b subunit of the bc complex
YP_740682.1	all4191	37.39	329	182	5	13	337	4	312	1e-69	224	[K] COG0202 DNA-directed RNA polymerase, alpha subunit/40 kD subunit
YP_740683.1	sll1817	55.65	124	55	0	15	138	7	130	6e-46	150	[J] COG0100 Ribosomal protein S11
YP_740684.1	asl4194	78.38	37	8	0	1	37	1	37	1e-14	63.2	[J] COG0257 Ribosomal protein L36
YP_740685.1	asl4195	60.81	74	28	1	1	73	1	74	5e-25	92.4	[J] COG0361 Translation initiation factor 1 (IF-1)
YP_740686.1	all4202	49.61	129	65	0	4	132	5	133	4e-42	140	[J] COG0096 Ribosomal protein S8
YP_740687.1	all4205	69.67	122	37	0	1	122	1	122	9e-61	187	[J] COG0093 Ribosomal protein L14
YP_740688.1	sll1805	71.97	132	37	0	1	132	1	132	1e-68	208	[J] COG0197 Ribosomal protein L16/L10E
YP_740689.1	all4209	43.58	218	117	3	1	217	1	213	3e-52	173	[J] COG0092 Ribosomal protein S3
YP_740690.1	all4210	52.34	107	51	0	5	111	6	112	3e-35	123	[J] COG0091 Ribosomal protein L22
YP_740691.1	asl4211	69.57	92	28	0	1	92	1	92	4e-46	147	[J] COG0185 Ribosomal protein S19
YP_740692.1	sll1802	55.96	277	118	2	1	274	1	276	2e-106	315	[J] COG0090 Ribosomal protein L2
YP_740693.1	sll1801	36.9	84	53	0	2	85	12	95	3e-14	65.5	[J] COG0089 Ribosomal protein L23
YP_740696.1	all4883	50.42	480	235	2	32	509	15	493	2e-158	466	[C] COG1007 NADH:ubiquinone oxidoreductase subunit 2 (chain N)
YP_740697.1	all4339	56.77	155	67	0	1	155	1	155	9e-61	189	[J] COG0049 Ribosomal protein S7
YP_740698.1	slr0844	45.38	736	344	10	1	736	1	678	0	579	[CP] COG1009 NADH:ubiquinone oxidoreductase subunit 5 (chain L)/Multisubunit Na+/H+ antiporter, MnhA subunit
YP_740699.1	asl3674	52.94	51	22	1	1	51	1	49	9e-07	43.5	[J] COG0333 Ribosomal protein L32
YP_740700.1	all0936	40.86	350	175	3	1	318	1	350	2e-81	256	[O] COG0755 ABC-type transport system involved in cytochrome c biogenesis, permease component
YP_740701.1	alr3957	56.76	481	206	2	3	482	5	484	0	558	[C] COG1008 NADH:ubiquinone oxidoreductase subunit 4 (chain M)
YP_740702.1	asr3463	88.89	81	9	0	1	81	1	81	7e-50	156	[C] COG1145 Ferredoxin
YP_740703.1	sll0522	60	100	40	0	1	100	3	102	7e-24	91.3	[C] COG0713 NADH:ubiquinone oxidoreductase subunit 11 or 4L (chain K)
YP_740704.1	sll0521	42.77	166	84	3	11	176	14	168	1e-30	114	[C] COG0839 NADH:ubiquinone oxidoreductase subunit 6 (chain J)
YP_740705.1	alr0224	61.85	173	66	0	1	173	1	173	1e-78	237	[C] COG1143 Formate hydrogenlyase subunit 6/NADH:ubiquinone oxidoreductase 23 kD subunit (chain I)
YP_740706.1	sll0519	57.85	363	133	3	10	363	13	364	3e-148	429	[C] COG1005 NADH:ubiquinone oxidoreductase subunit 1 (chain H)
YP_740707.1	alr3355	71.98	389	108	1	6	393	6	394	0	616	[C] COG0649 NADH:ubiquinone oxidoreductase 49 kD subunit 7
YP_740708.1	FN1979	52.86	70	33	0	16	85	15	84	4e-17	72.8	[J] COG0184 Ribosomal protein S15P/S13E
YP_740710.1	all4339	56.77	155	67	0	1	155	1	155	9e-61	189	[J] COG0049 Ribosomal protein S7
YP_740711.1	all4883	50.42	480	235	2	32	509	15	493	2e-158	466	[C] COG1007 NADH:ubiquinone oxidoreductase subunit 2 (chain N)
YP_740714.1	sll1801	36.9	84	53	0	2	85	12	95	3e-14	65.5	[J] COG0089 Ribosomal protein L23
YP_740715.1	sll1802	55.96	277	118	2	1	274	1	276	2e-106	315	[J] COG0090 Ribosomal protein L2
YP_001004165.1	sll1096	83.74	123	20	0	1	123	1	123	2e-71	214	[J] COG0048 Ribosomal protein S12
YP_001004168.1	ssr0482	52.56	78	37	0	1	78	1	78	1e-22	86.7	[J] COG0228 Ribosomal protein S16
YP_001004171.1	sll1326	71.46	501	143	0	1	501	1	501	0	751	[C] COG0056 F0F1-type ATP synthase, alpha subunit
YP_001004172.1	sll1324	28.31	166	119	0	12	177	12	177	2e-18	81.3	[C] COG0711 F0F1-type ATP synthase, subunit b
YP_001004173.1	asl0009	94.92	59	3	0	22	80	22	80	4e-32	110	[C] COG0636 F0F1-type ATP synthase, subunit c/Archaeal/vacuolar-type H+-ATPase, subunit K
YP_001004174.1	all0010	71.05	228	65	1	17	243	12	239	9e-103	304	[C] COG0356 F0F1-type ATP synthase, subunit a
YP_001004175.1	all4792	54.5	222	101	0	8	229	4	225	1e-91	275	[J] COG0052 Ribosomal protein S2
YP_001004176.1	sll1789	34.28	849	477	20	7	838	1	785	3e-124	422	[K] COG0086 DNA-directed RNA polymerase, beta' subunit/160 kD subunit
YP_001004177.1	alr1595	46.63	667	294	9	10	669	12	623	0	573	[K] COG0086 DNA-directed RNA polymerase, beta' subunit/160 kD subunit
YP_001004178.1	alr1594	47.57	1070	521	10	12	1053	27	1084	0	1004	[K] COG0085 DNA-directed RNA polymerase, beta subunit/140 kD subunit
YP_001004184.1	slr0628	51	100	49	0	1	100	1	100	6e-29	104	[J] COG0199 Ribosomal protein S14
YP_001004187.1	slr0823	62.5	168	63	0	1	168	1	168	6e-72	219	[R] COG0457 FOG: TPR repeat
YP_001004188.1	slr0469	58.54	205	78	3	1	201	1	202	6e-79	239	[J] COG0522 Ribosomal protein S4 and related proteins
YP_001004189.1	all3840	55.77	156	69	0	3	158	20	175	6e-63	196	[C] COG0852 NADH:ubiquinone oxidoreductase 27 kD subunit
YP_001004190.1	all3841	68.56	194	61	0	1	194	16	209	1e-96	287	[C] COG0377 NADH:ubiquinone oxidoreductase 20 kD subunit and related Fe-S oxidoreductases
YP_001004191.1	slr1279	65.83	120	41	0	1	120	1	120	1e-51	164	[C] COG0838 NADH:ubiquinone oxidoreductase subunit 3 (chain A)
YP_001004192.1	slr1330	45.04	131	69	1	1	128	30	160	2e-36	126	[C] COG0355 F0F1-type ATP synthase, epsilon subunit (mitochondrial delta subunit)
YP_001004193.1	all5039	81.51	476	88	0	12	487	2	477	0	794	[C] COG0055 F0F1-type ATP synthase, beta subunit
YP_001004194.1	alr1524	84.53	472	73	0	4	475	5	476	0	838	[G] COG1850 Ribulose 1,5-bisphosphate carboxylase, large subunit
YP_001004195.1	sll0336	57.03	263	110	3	229	490	32	292	6e-100	308	[I] COG0777 Acetyl-CoA carboxylase beta subunit
YP_001004207.1	asl4452	56.92	65	27	1	1	65	1	64	9e-18	73.2	[J] COG0267 Ribosomal protein L33
YP_001004208.1	asl4451	55.22	67	30	0	15	81	4	70	5e-20	80.5	[J] COG0238 Ribosomal protein S18
YP_001004209.1	BH3138	43.86	114	62	1	1	114	1	112	4e-22	87.8	[J] COG0292 Ribosomal protein L20
YP_001004210.1	sll1096	83.74	123	20	0	1	123	1	123	2e-71	214	[J] COG0048 Ribosomal protein S12
YP_001004211.1	all4357	53.57	196	89	2	1	195	1	195	1e-72	223	[OU] COG0740 Protease subunit of ATP-dependent Clp proteases
YP_001004216.1	alr3421	82.79	215	37	0	1	215	1	215	1e-134	382	[C] COG1290 Cytochrome b subunit of the bc complex
YP_001004217.1	alr3422	80.62	160	31	0	1	160	1	160	2e-92	271	[C] COG1290 Cytochrome b subunit of the bc complex
YP_001004218.1	all4191	34.85	330	188	6	13	338	4	310	2e-61	204	[K] COG0202 DNA-directed RNA polymerase, alpha subunit/40 kD subunit
YP_001004219.1	sll1817	55.81	129	54	1	10	138	5	130	1e-46	152	[J] COG0100 Ribosomal protein S11
YP_001004220.1	asl4194	78.38	37	8	0	1	37	1	37	1e-14	63.2	[J] COG0257 Ribosomal protein L36
YP_001004221.2	all4202	48.06	129	67	0	4	132	5	133	4e-40	135	[J] COG0096 Ribosomal protein S8
YP_001004222.1	all4205	70.49	122	36	0	1	122	1	122	4e-61	188	[J] COG0093 Ribosomal protein L14
YP_001004223.1	all4208	74.44	133	34	0	1	133	1	133	4e-70	212	[J] COG0197 Ribosomal protein L16/L10E
YP_001004224.1	all4209	42.86	217	119	3	1	216	1	213	8e-50	167	[J] COG0092 Ribosomal protein S3
YP_001004225.1	asl4211	65.22	92	32	0	1	92	1	92	4e-42	137	[J] COG0185 Ribosomal protein S19
YP_001004226.1	sll1802	55.96	277	118	2	1	274	1	276	5e-107	317	[J] COG0090 Ribosomal protein L2
YP_001004227.1	sll1801	36.9	84	53	0	2	85	12	95	4e-14	65.5	[J] COG0089 Ribosomal protein L23
YP_001004229.1	all4883	50.62	480	234	2	32	509	15	493	9e-160	469	[C] COG1007 NADH:ubiquinone oxidoreductase subunit 2 (chain N)
YP_001004230.1	all4339	56.13	155	68	0	1	155	1	155	8e-61	189	[J] COG0049 Ribosomal protein S7
YP_001004232.1	FN1979	47.95	73	38	0	13	85	12	84	1e-16	71.2	[J] COG0184 Ribosomal protein S15P/S13E
YP_001004233.1	alr3355	71.47	389	110	1	6	393	6	394	0	617	[C] COG0649 NADH:ubiquinone oxidoreductase 49 kD subunit 7
YP_001004234.1	sll0519	57.89	361	146	2	3	360	7	364	2e-152	439	[C] COG1005 NADH:ubiquinone oxidoreductase subunit 1 (chain H)
YP_001004235.1	sll0520	71.33	143	41	0	10	152	11	153	9e-79	238	[C] COG1143 Formate hydrogenlyase subunit 6/NADH:ubiquinone oxidoreductase 23 kD subunit (chain I)
YP_001004236.1	sll0521	43.64	165	83	3	14	176	12	168	7e-30	112	[C] COG0839 NADH:ubiquinone oxidoreductase subunit 6 (chain J)
YP_001004237.1	sll0522	57	100	43	0	1	100	3	102	5e-22	86.7	[C] COG0713 NADH:ubiquinone oxidoreductase subunit 11 or 4L (chain K)
YP_001004238.1	asr3463	88.89	81	9	0	1	81	1	81	7e-50	156	[C] COG1145 Ferredoxin
YP_001004239.1	alr3957	56.08	485	211	2	3	487	5	487	0	557	[C] COG1008 NADH:ubiquinone oxidoreductase subunit 4 (chain M)
YP_001004240.1	all0936	39.43	350	175	5	1	313	1	350	5e-74	236	[O] COG0755 ABC-type transport system involved in cytochrome c biogenesis, permease component
YP_001004241.1	asl3674	53.49	43	20	0	1	43	1	43	4e-06	41.6	[J] COG0333 Ribosomal protein L32
YP_001004242.1	slr0844	44.86	740	340	9	1	735	1	677	0	586	[CP] COG1009 NADH:ubiquinone oxidoreductase subunit 5 (chain L)/Multisubunit Na+/H+ antiporter, MnhA subunit
YP_001004243.1	all4339	56.13	155	68	0	1	155	1	155	8e-61	189	[J] COG0049 Ribosomal protein S7
YP_001004244.1	all4883	50.62	480	234	2	32	509	15	493	9e-160	469	[C] COG1007 NADH:ubiquinone oxidoreductase subunit 2 (chain N)
YP_001004246.1	sll1801	36.9	84	53	0	2	85	12	95	4e-14	65.5	[J] COG0089 Ribosomal protein L23
YP_001004247.1	sll1802	55.96	277	118	2	1	274	1	276	5e-107	317	[J] COG0090 Ribosomal protein L2
YP_001019178.1	sll1803	49.17	120	61	0	1	120	1	120	4e-38	131	[J] COG0091 Ribosomal protein L22
YP_002836069.1	sll1096	82.93	123	21	0	1	123	1	123	2e-70	211	[J] COG0048 Ribosomal protein S12
YP_002836072.1	ssr0482	50.62	81	40	0	1	81	1	81	5e-22	85.5	[J] COG0228 Ribosomal protein S16
YP_002836075.1	sll1326	71.06	501	145	0	1	501	1	501	0	747	[C] COG0056 F0F1-type ATP synthase, alpha subunit
YP_002836076.1	sll1324	25.88	170	126	0	8	177	8	177	8e-17	76.6	[C] COG0711 F0F1-type ATP synthase, subunit b
YP_002836077.1	asl0009	94.92	59	3	0	22	80	22	80	4e-32	110	[C] COG0636 F0F1-type ATP synthase, subunit c/Archaeal/vacuolar-type H+-ATPase, subunit K
YP_002836078.1	all0010	71.05	228	65	1	17	243	12	239	2e-102	303	[C] COG0356 F0F1-type ATP synthase, subunit a
YP_002836079.1	all4792	54.05	222	102	0	8	229	4	225	7e-92	276	[J] COG0052 Ribosomal protein S2
YP_002836080.1	sll1789	32.88	949	545	24	7	934	1	878	2e-125	426	[K] COG0086 DNA-directed RNA polymerase, beta' subunit/160 kD subunit
YP_002836081.1	alr1595	46.56	668	293	11	10	669	12	623	0	568	[K] COG0086 DNA-directed RNA polymerase, beta' subunit/160 kD subunit
YP_002836082.1	sll1787	47.18	1062	538	10	6	1054	3	1054	0	995	[K] COG0085 DNA-directed RNA polymerase, beta subunit/140 kD subunit
YP_002836088.1	slr0628	53	100	47	0	1	100	1	100	1e-30	108	[J] COG0199 Ribosomal protein S14
YP_002836091.1	slr0823	61.76	170	65	0	1	170	1	170	9e-73	221	[R] COG0457 FOG: TPR repeat
YP_002836092.1	slr0469	58.54	205	78	3	1	201	1	202	2e-79	241	[J] COG0522 Ribosomal protein S4 and related proteins
YP_002836093.1	all3840	55.13	156	70	0	3	158	20	175	5e-62	193	[C] COG0852 NADH:ubiquinone oxidoreductase 27 kD subunit
YP_002836094.1	slr1280	71.27	181	52	0	16	196	33	213	5e-95	283	[C] COG0377 NADH:ubiquinone oxidoreductase 20 kD subunit and related Fe-S oxidoreductases
YP_002836095.1	slr1279	64.17	120	43	0	1	120	1	120	1e-50	161	[C] COG0838 NADH:ubiquinone oxidoreductase subunit 3 (chain A)
YP_002836096.1	slr1330	45.04	131	69	1	1	128	30	160	2e-36	127	[C] COG0355 F0F1-type ATP synthase, epsilon subunit (mitochondrial delta subunit)
YP_002836097.1	all5039	81.72	476	87	0	12	487	2	477	0	796	[C] COG0055 F0F1-type ATP synthase, beta subunit
YP_002836098.1	alr1524	84.96	472	71	0	4	475	5	476	0	841	[G] COG1850 Ribulose 1,5-bisphosphate carboxylase, large subunit
YP_002836099.1	sll0336	57.41	263	109	3	224	485	32	292	8e-102	313	[I] COG0777 Acetyl-CoA carboxylase beta subunit
YP_002836111.1	asl4452	58.46	65	26	1	1	65	1	64	5e-19	76.3	[J] COG0267 Ribosomal protein L33
YP_002836112.1	asl4451	55.22	67	30	0	15	81	4	70	5e-20	80.5	[J] COG0238 Ribosomal protein S18
YP_002836113.1	BH3138	43.86	114	62	1	1	114	1	112	2e-23	90.9	[J] COG0292 Ribosomal protein L20
YP_002836114.1	sll1096	82.93	123	21	0	1	123	1	123	2e-70	211	[J] COG0048 Ribosomal protein S12
YP_002836115.1	all4357	53.57	196	89	2	1	195	1	195	3e-72	222	[OU] COG0740 Protease subunit of ATP-dependent Clp proteases
YP_002836120.1	alr3421	83.26	215	36	0	1	215	1	215	1e-135	384	[C] COG1290 Cytochrome b subunit of the bc complex
YP_002836121.1	alr3422	80.62	160	31	0	1	160	1	160	3e-92	270	[C] COG1290 Cytochrome b subunit of the bc complex
YP_002836122.1	all4191	35.4	322	176	5	13	323	4	304	8e-62	204	[K] COG0202 DNA-directed RNA polymerase, alpha subunit/40 kD subunit
YP_002836123.1	sll1817	56.45	124	54	0	15	138	7	130	1e-46	152	[J] COG0100 Ribosomal protein S11
YP_002836124.1	asl4194	78.38	37	8	0	1	37	1	37	1e-14	63.2	[J] COG0257 Ribosomal protein L36
YP_002836125.1	asl4195	60.81	74	28	1	1	73	1	74	5e-25	92.4	[J] COG0361 Translation initiation factor 1 (IF-1)
YP_002836126.1	all4202	49.61	129	65	0	4	132	5	133	3e-42	140	[J] COG0096 Ribosomal protein S8
YP_002836127.1	all4205	69.67	122	37	0	1	122	1	122	1e-60	187	[J] COG0093 Ribosomal protein L14
YP_002836128.1	sll1805	74.24	132	34	0	1	132	1	132	2e-70	213	[J] COG0197 Ribosomal protein L16/L10E
YP_002836129.1	sll1804	43.78	217	113	3	1	217	1	208	6e-52	172	[J] COG0092 Ribosomal protein S3
YP_002836130.1	sll1803	51.75	114	55	0	1	114	1	114	6e-39	133	[J] COG0091 Ribosomal protein L22
YP_002836131.1	asl4211	65.22	92	32	0	1	92	1	92	3e-42	137	[J] COG0185 Ribosomal protein S19
YP_002836132.1	sll1802	54.71	276	123	1	1	274	1	276	4e-106	314	[J] COG0090 Ribosomal protein L2
YP_002836133.1	sll1801	36.9	84	53	0	2	85	12	95	3e-14	65.5	[J] COG0089 Ribosomal protein L23
YP_002836134.1	PAB2233	24.73	182	115	4	1727	1895	226	398	9e-06	52.4	[O] COG1222 ATP-dependent 26S proteasome regulatory subunit
YP_002836135.1	all4883	50.42	480	235	2	32	509	15	493	9e-159	467	[C] COG1007 NADH:ubiquinone oxidoreductase subunit 2 (chain N)
YP_002836136.1	all4339	56.13	155	68	0	1	155	1	155	8e-61	189	[J] COG0049 Ribosomal protein S7
YP_002836137.1	slr0844	43.89	736	355	8	1	736	1	678	0	561	[CP] COG1009 NADH:ubiquinone oxidoreductase subunit 5 (chain L)/Multisubunit Na+/H+ antiporter, MnhA subunit
YP_002836138.1	asl3674	53.49	43	20	0	1	43	1	43	1e-06	43.1	[J] COG0333 Ribosomal protein L32
YP_002836139.1	all0936	40	350	178	4	1	318	1	350	7e-77	244	[O] COG0755 ABC-type transport system involved in cytochrome c biogenesis, permease component
YP_002836140.1	alr3957	56.61	484	208	2	3	485	5	487	0	557	[C] COG1008 NADH:ubiquinone oxidoreductase subunit 4 (chain M)
YP_002836141.1	asr3463	88.89	81	9	0	1	81	1	81	7e-50	156	[C] COG1145 Ferredoxin
YP_002836142.1	sll0522	58	100	42	0	1	100	3	102	1e-22	88.2	[C] COG0713 NADH:ubiquinone oxidoreductase subunit 11 or 4L (chain K)
YP_002836143.1	sll0521	42.77	159	82	3	19	176	18	168	1e-28	108	[C] COG0839 NADH:ubiquinone oxidoreductase subunit 6 (chain J)
YP_002836144.1	alr0224	63.01	173	64	0	1	173	1	173	1e-80	243	[C] COG1143 Formate hydrogenlyase subunit 6/NADH:ubiquinone oxidoreductase 23 kD subunit (chain I)
YP_002836145.1	sll0519	58.4	363	143	3	5	359	2	364	3e-146	424	[C] COG1005 NADH:ubiquinone oxidoreductase subunit 1 (chain H)
YP_002836146.1	alr3355	71.47	389	110	1	6	393	6	394	0	612	[C] COG0649 NADH:ubiquinone oxidoreductase 49 kD subunit 7
YP_002836147.1	FN1979	50	70	35	0	16	85	15	84	2e-16	71.2	[J] COG0184 Ribosomal protein S15P/S13E
YP_002836149.1	all4339	56.13	155	68	0	1	155	1	155	8e-61	189	[J] COG0049 Ribosomal protein S7
YP_002836150.1	all4883	50.42	480	235	2	32	509	15	493	9e-159	467	[C] COG1007 NADH:ubiquinone oxidoreductase subunit 2 (chain N)
YP_002836151.1	PAB2233	24.73	182	115	4	1727	1895	226	398	9e-06	52.4	[O] COG1222 ATP-dependent 26S proteasome regulatory subunit
YP_002836152.1	sll1801	36.9	84	53	0	2	85	12	95	3e-14	65.5	[J] COG0089 Ribosomal protein L23
YP_002836153.1	sll1802	54.71	276	123	1	1	274	1	276	4e-106	314	[J] COG0090 Ribosomal protein L2
YP_008592621.1	ssr0482	51.61	62	30	0	2	63	17	78	3e-16	69.3	[J] COG0228 Ribosomal protein S16
YP_008592624.1	sll1326	72.26	501	139	0	1	501	1	501	0	753	[C] COG0056 F0F1-type ATP synthase, alpha subunit
YP_008592625.1	sll1324	26.32	171	121	1	12	182	12	177	8e-15	71.2	[C] COG0711 F0F1-type ATP synthase, subunit b
YP_008592626.1	asl0009	94.92	59	3	0	22	80	22	80	4e-32	110	[C] COG0636 F0F1-type ATP synthase, subunit c/Archaeal/vacuolar-type H+-ATPase, subunit K
YP_008592627.1	all0010	69.74	228	68	1	17	243	12	239	2e-100	298	[C] COG0356 F0F1-type ATP synthase, subunit a
YP_008592628.1	all4792	49.12	226	115	0	8	233	4	229	2e-85	259	[J] COG0052 Ribosomal protein S2
YP_008592629.1	sll1789	35.28	839	469	23	7	827	1	783	4e-125	425	[K] COG0086 DNA-directed RNA polymerase, beta' subunit/160 kD subunit
YP_008592630.1	alr1595	46.32	665	303	9	10	673	12	623	0	570	[K] COG0086 DNA-directed RNA polymerase, beta' subunit/160 kD subunit
YP_008592631.1	alr1594	47.66	1070	520	11	12	1053	27	1084	0	999	[K] COG0085 DNA-directed RNA polymerase, beta subunit/140 kD subunit
YP_008592637.1	slr0628	53	100	47	0	1	100	1	100	6e-30	106	[J] COG0199 Ribosomal protein S14
YP_008592640.1	slr0823	62.13	169	63	1	1	169	1	168	3e-71	217	[R] COG0457 FOG: TPR repeat
YP_008592641.1	slr0469	58.13	203	82	2	1	201	1	202	9e-80	241	[J] COG0522 Ribosomal protein S4 and related proteins
YP_008592642.1	all3840	56.77	155	67	0	3	157	20	174	8e-64	198	[C] COG0852 NADH:ubiquinone oxidoreductase 27 kD subunit
YP_008592643.1	all3841	68.02	197	63	0	58	254	13	209	3e-96	288	[C] COG0377 NADH:ubiquinone oxidoreductase 20 kD subunit and related Fe-S oxidoreductases
YP_008592644.1	all3841	68.02	197	63	0	21	217	13	209	2e-97	290	[C] COG0377 NADH:ubiquinone oxidoreductase 20 kD subunit and related Fe-S oxidoreductases
YP_008592645.1	slr1279	64.17	120	43	0	1	120	1	120	1e-50	160	[C] COG0838 NADH:ubiquinone oxidoreductase subunit 3 (chain A)
YP_008592646.1	slr1330	45.04	131	69	1	1	128	30	160	2e-35	124	[C] COG0355 F0F1-type ATP synthase, epsilon subunit (mitochondrial delta subunit)
YP_008592647.1	all5039	81.09	476	90	0	12	487	2	477	0	789	[C] COG0055 F0F1-type ATP synthase, beta subunit
YP_008592648.1	alr1524	84.96	472	71	0	4	475	5	476	0	845	[G] COG1850 Ribulose 1,5-bisphosphate carboxylase, large subunit
YP_008592649.1	sll0336	57.2	271	109	3	236	501	32	300	1e-104	321	[I] COG0777 Acetyl-CoA carboxylase beta subunit
YP_008592661.1	asl4452	59.38	64	26	0	1	64	1	64	9e-22	83.6	[J] COG0267 Ribosomal protein L33
YP_008592662.1	asl4451	53.73	67	31	0	14	80	4	70	5e-19	77.8	[J] COG0238 Ribosomal protein S18
YP_008592663.1	alr3428	51.33	113	53	1	1	113	1	111	2e-22	88.6	[J] COG0292 Ribosomal protein L20
YP_008592664.1	sll1096	68.42	38	12	0	1	38	1	38	1e-11	57.4	[J] COG0048 Ribosomal protein S12
YP_008592665.1	all4357	38.61	202	113	6	1	201	1	192	3e-41	143	[OU] COG0740 Protease subunit of ATP-dependent Clp proteases
YP_008592670.1	alr3421	82.79	215	37	0	14	228	1	215	2e-133	380	[C] COG1290 Cytochrome b subunit of the bc complex
YP_008592671.1	alr3422	82.05	156	28	0	19	174	5	160	4e-91	268	[C] COG1290 Cytochrome b subunit of the bc complex
YP_008592672.1	aq_073	51.3	115	56	0	40	154	11	125	3e-43	144	[J] COG0100 Ribosomal protein S11
YP_008592673.1	asl4194	78.38	37	8	0	1	37	1	37	6e-14	61.2	[J] COG0257 Ribosomal protein L36
YP_008592674.1	aq_075a	56.52	69	30	0	2	70	12	80	3e-22	85.5	[J] COG0361 Translation initiation factor 1 (IF-1)
YP_008592675.1	all4202	49.61	129	65	0	4	132	5	133	1e-40	136	[J] COG0096 Ribosomal protein S8
YP_008592676.1	all4205	65.57	122	42	0	1	122	1	122	7e-58	179	[J] COG0093 Ribosomal protein L14
YP_008592677.1	sll1805	71.54	130	37	0	4	133	3	132	5e-68	206	[J] COG0197 Ribosomal protein L16/L10E
YP_008592678.1	sll1804	42.4	217	116	3	1	217	1	208	2e-49	165	[J] COG0092 Ribosomal protein S3
YP_008592679.1	all4210	50.47	107	53	0	30	136	6	112	2e-33	119	[J] COG0091 Ribosomal protein L22
YP_008592680.1	asl4211	65.56	90	31	0	6	95	3	92	9e-43	139	[J] COG0185 Ribosomal protein S19
YP_008592681.1	sll1802	58.66	254	103	2	25	278	25	276	1e-101	303	[J] COG0090 Ribosomal protein L2
YP_008592682.1	sll1801	36.9	84	53	0	2	85	12	95	2e-13	63.9	[J] COG0089 Ribosomal protein L23
YP_008592685.1	all4883	46.69	514	237	3	32	543	15	493	2e-149	444	[C] COG1007 NADH:ubiquinone oxidoreductase subunit 2 (chain N)
YP_008592686.1	all4339	56.13	155	68	0	1	155	1	155	4e-59	185	[J] COG0049 Ribosomal protein S7
YP_008592687.1	sll1096	93.33	75	5	0	2	76	41	115	7e-46	147	[J] COG0048 Ribosomal protein S12
YP_008592689.1	FN1979	48.57	70	36	0	42	111	15	84	2e-14	66.6	[J] COG0184 Ribosomal protein S15P/S13E
YP_008592690.1	alr3355	72.24	389	107	1	6	393	6	394	0	614	[C] COG0649 NADH:ubiquinone oxidoreductase 49 kD subunit 7
YP_008592691.1	sll0519	61.09	329	121	2	40	365	40	364	1e-142	415	[C] COG1005 NADH:ubiquinone oxidoreductase subunit 1 (chain H)
YP_008592692.1	sll0520	64.78	159	50	1	10	168	11	163	3e-77	233	[C] COG1143 Formate hydrogenlyase subunit 6/NADH:ubiquinone oxidoreductase 23 kD subunit (chain I)
YP_008592693.1	sll0521	42.77	166	84	3	11	176	14	168	9e-30	112	[C] COG0839 NADH:ubiquinone oxidoreductase subunit 6 (chain J)
YP_008592694.1	sll0522	57	100	43	0	1	100	3	102	2e-21	84.7	[C] COG0713 NADH:ubiquinone oxidoreductase subunit 11 or 4L (chain K)
YP_008592695.1	asr3463	88.89	81	9	0	1	81	1	81	7e-50	156	[C] COG1145 Ferredoxin
YP_008592696.1	alr3957	56.61	484	208	2	17	499	2	484	0	557	[C] COG1008 NADH:ubiquinone oxidoreductase subunit 4 (chain M)
YP_008592697.1	sll1513	42.43	337	169	5	1	316	1	333	7e-83	259	[O] COG0755 ABC-type transport system involved in cytochrome c biogenesis, permease component
YP_008592698.1	asl3674	58.14	43	18	0	1	43	1	43	5e-07	44.3	[J] COG0333 Ribosomal protein L32
YP_008592699.1	slr0844	45.77	721	325	11	6	723	6	663	0	568	[CP] COG1009 NADH:ubiquinone oxidoreductase subunit 5 (chain L)/Multisubunit Na+/H+ antiporter, MnhA subunit
YP_008592701.1	sll1096	93.33	75	5	0	2	76	41	115	7e-46	147	[J] COG0048 Ribosomal protein S12
YP_008592702.1	all4339	56.13	155	68	0	1	155	1	155	4e-59	185	[J] COG0049 Ribosomal protein S7
YP_008592703.1	all4883	50	480	237	2	32	509	15	493	1e-156	462	[C] COG1007 NADH:ubiquinone oxidoreductase subunit 2 (chain N)
YP_008592706.1	sll1801	36.9	84	53	0	2	85	12	95	2e-13	63.9	[J] COG0089 Ribosomal protein L23
YP_008592707.1	sll1802	52.1	286	103	2	25	310	25	276	9e-97	292	[J] COG0090 Ribosomal protein L2
YP_008592708.1	asl4211	65.56	90	31	0	6	95	3	92	9e-43	139	[J] COG0185 Ribosomal protein S19
YP_008592709.1	all4210	50.47	107	53	0	26	132	6	112	2e-33	119	[J] COG0091 Ribosomal protein L22
YP_008592710.1	sll1804	42.4	217	116	3	1	217	1	208	2e-49	165	[J] COG0092 Ribosomal protein S3
YP_008592711.1	sll1805	71.54	130	37	0	4	133	3	132	5e-68	206	[J] COG0197 Ribosomal protein L16/L10E
YP_008592712.1	all4205	65.57	122	42	0	1	122	1	122	7e-58	179	[J] COG0093 Ribosomal protein L14
YP_008592713.1	all4202	49.61	129	65	0	4	132	5	133	1e-40	136	[J] COG0096 Ribosomal protein S8
YP_008592714.1	aq_075a	56.52	69	30	0	2	70	12	80	3e-22	85.5	[J] COG0361 Translation initiation factor 1 (IF-1)
YP_008592715.1	asl4194	78.38	37	8	0	1	37	1	37	6e-14	61.2	[J] COG0257 Ribosomal protein L36
YP_008592716.1	aq_073	51.3	115	56	0	40	154	11	125	3e-43	144	[J] COG0100 Ribosomal protein S11
YP_008592717.1	alr3422	82.05	156	28	0	19	174	5	160	4e-91	268	[C] COG1290 Cytochrome b subunit of the bc complex
YP_008592718.1	alr3421	82.79	215	37	0	14	228	1	215	2e-133	380	[C] COG1290 Cytochrome b subunit of the bc complex
YP_009114848.1	sll1096	83.74	123	20	0	1	123	1	123	2e-71	214	[J] COG0048 Ribosomal protein S12
YP_009114851.1	ssr0482	50	82	41	0	1	82	1	82	1e-22	86.7	[J] COG0228 Ribosomal protein S16
YP_009114854.1	sll1326	72.06	501	140	0	1	501	1	501	0	756	[C] COG0056 F0F1-type ATP synthase, alpha subunit
YP_009114855.1	sll1324	25.88	170	126	0	8	177	8	177	1e-16	76.3	[C] COG0711 F0F1-type ATP synthase, subunit b
YP_009114856.1	asl0009	94.92	59	3	0	22	80	22	80	4e-32	110	[C] COG0636 F0F1-type ATP synthase, subunit c/Archaeal/vacuolar-type H+-ATPase, subunit K
YP_009114857.1	all0010	70.61	228	66	1	17	243	12	239	3e-101	300	[C] COG0356 F0F1-type ATP synthase, subunit a
YP_009114858.1	all4792	54.05	222	102	0	8	229	4	225	2e-92	278	[J] COG0052 Ribosomal protein S2
YP_009114859.1	sll1789	34.79	848	472	22	7	836	1	785	2e-125	426	[K] COG0086 DNA-directed RNA polymerase, beta' subunit/160 kD subunit
YP_009114860.1	alr1595	46.03	667	298	10	17	676	12	623	0	566	[K] COG0086 DNA-directed RNA polymerase, beta' subunit/160 kD subunit
YP_009114861.1	alr1594	47.38	1070	523	10	12	1053	27	1084	0	992	[K] COG0085 DNA-directed RNA polymerase, beta subunit/140 kD subunit
YP_009114867.1	slr0628	54	100	46	0	1	100	1	100	2e-31	110	[J] COG0199 Ribosomal protein S14
YP_009114870.1	slr0823	62.5	168	63	0	1	168	1	168	4e-72	219	[R] COG0457 FOG: TPR repeat
YP_009114871.1	slr0469	58.05	205	79	3	1	201	1	202	9e-79	239	[J] COG0522 Ribosomal protein S4 and related proteins
YP_009114872.1	all3840	55.77	156	69	0	3	158	20	175	2e-63	197	[C] COG0852 NADH:ubiquinone oxidoreductase 27 kD subunit
YP_009114873.1	all3841	69.07	194	60	0	1	194	16	209	1e-96	287	[C] COG0377 NADH:ubiquinone oxidoreductase 20 kD subunit and related Fe-S oxidoreductases
YP_009114874.1	slr1279	65.83	120	41	0	1	120	1	120	8e-52	164	[C] COG0838 NADH:ubiquinone oxidoreductase subunit 3 (chain A)
YP_009114875.1	slr1330	45.8	131	68	1	1	128	30	160	3e-36	126	[C] COG0355 F0F1-type ATP synthase, epsilon subunit (mitochondrial delta subunit)
YP_009114876.1	all5039	82.2	472	84	0	16	487	6	477	0	793	[C] COG0055 F0F1-type ATP synthase, beta subunit
YP_009114877.1	alr1524	84.96	472	71	0	4	475	5	476	0	843	[G] COG1850 Ribulose 1,5-bisphosphate carboxylase, large subunit
YP_009114878.1	sll0336	56.46	271	111	3	240	505	32	300	4e-101	312	[I] COG0777 Acetyl-CoA carboxylase beta subunit
YP_009114890.1	asl4452	55.22	67	27	1	1	67	1	64	1e-17	72.8	[J] COG0267 Ribosomal protein L33
YP_009114891.1	asl4451	55.22	67	30	0	15	81	4	70	5e-20	80.5	[J] COG0238 Ribosomal protein S18
YP_009114892.1	alr3428	58.82	102	40	1	1	102	1	100	4e-23	90.5	[J] COG0292 Ribosomal protein L20
YP_009114893.1	sll1096	83.74	123	20	0	1	123	1	123	2e-71	214	[J] COG0048 Ribosomal protein S12
YP_009114894.1	all4357	53.57	196	90	1	1	196	1	195	1e-74	228	[OU] COG0740 Protease subunit of ATP-dependent Clp proteases
YP_009114899.1	alr3421	83.26	215	36	0	1	215	1	215	2e-135	384	[C] COG1290 Cytochrome b subunit of the bc complex
YP_009114900.1	alr3422	80	160	32	0	1	160	1	160	3e-91	268	[C] COG1290 Cytochrome b subunit of the bc complex
YP_009114901.1	all4191	35.98	328	185	5	13	336	4	310	6e-65	212	[K] COG0202 DNA-directed RNA polymerase, alpha subunit/40 kD subunit
YP_009114902.1	sll1817	56.45	124	54	0	15	138	7	130	1e-46	152	[J] COG0100 Ribosomal protein S11
YP_009114903.1	asl4194	78.38	37	8	0	1	37	1	37	1e-14	63.2	[J] COG0257 Ribosomal protein L36
YP_009114904.1	all4202	52.31	130	60	2	4	132	5	133	3e-42	140	[J] COG0096 Ribosomal protein S8
YP_009114905.1	all4205	70.49	122	36	0	1	122	1	122	8e-62	189	[J] COG0093 Ribosomal protein L14
YP_009114906.1	sll1805	75	132	33	0	1	132	1	132	8e-71	214	[J] COG0197 Ribosomal protein L16/L10E
YP_009114907.1	sll1804	45.16	217	110	3	1	217	1	208	7e-54	177	[J] COG0092 Ribosomal protein S3
YP_009114908.1	sll1803	48.33	120	62	0	1	120	1	120	1e-37	130	[J] COG0091 Ribosomal protein L22
YP_009114909.1	asl4211	65.22	92	32	0	1	92	1	92	1e-42	139	[J] COG0185 Ribosomal protein S19
YP_009114910.1	sll1802	56.32	277	117	2	1	274	1	276	4e-107	317	[J] COG0090 Ribosomal protein L2
YP_009114911.1	sll1801	36.9	84	53	0	2	85	12	95	8e-14	64.7	[J] COG0089 Ribosomal protein L23
YP_009114913.1	all4883	49.79	480	238	2	32	509	15	493	1e-156	461	[C] COG1007 NADH:ubiquinone oxidoreductase subunit 2 (chain N)
YP_009114914.1	all4339	56.13	155	68	0	1	155	1	155	8e-61	189	[J] COG0049 Ribosomal protein S7
YP_009114915.1	slr0844	44.15	727	333	10	1	718	1	663	0	558	[CP] COG1009 NADH:ubiquinone oxidoreductase subunit 5 (chain L)/Multisubunit Na+/H+ antiporter, MnhA subunit
YP_009114916.1	all0936	40.86	350	177	4	1	320	1	350	8e-79	249	[O] COG0755 ABC-type transport system involved in cytochrome c biogenesis, permease component
YP_009114917.1	alr3957	56.82	484	207	2	3	485	5	487	0	560	[C] COG1008 NADH:ubiquinone oxidoreductase subunit 4 (chain M)
YP_009114918.1	asr3463	88.89	81	9	0	1	81	1	81	7e-50	156	[C] COG1145 Ferredoxin
YP_009114919.1	sll0522	59	100	41	0	1	100	3	102	3e-23	89.7	[C] COG0713 NADH:ubiquinone oxidoreductase subunit 11 or 4L (chain K)
YP_009114920.1	sll0521	40.11	177	97	3	1	177	1	168	1e-30	114	[C] COG0839 NADH:ubiquinone oxidoreductase subunit 6 (chain J)
YP_009114921.1	alr0224	61.85	173	66	0	1	173	1	173	1e-78	238	[C] COG1143 Formate hydrogenlyase subunit 6/NADH:ubiquinone oxidoreductase 23 kD subunit (chain I)
YP_009114922.1	sll0519	58.68	363	143	2	5	360	2	364	8e-150	433	[C] COG1005 NADH:ubiquinone oxidoreductase subunit 1 (chain H)
YP_009114923.1	alr3355	72.49	389	106	1	6	393	6	394	0	622	[C] COG0649 NADH:ubiquinone oxidoreductase 49 kD subunit 7
YP_009114924.1	FN1979	50	70	35	0	13	82	15	84	3e-16	70.5	[J] COG0184 Ribosomal protein S15P/S13E
YP_009114926.1	all4339	56.13	155	68	0	1	155	1	155	8e-61	189	[J] COG0049 Ribosomal protein S7
YP_009114927.1	all4883	49.79	480	238	2	32	509	15	493	1e-156	461	[C] COG1007 NADH:ubiquinone oxidoreductase subunit 2 (chain N)
YP_009114929.1	sll1801	36.9	84	53	0	2	85	12	95	8e-14	64.7	[J] COG0089 Ribosomal protein L23
YP_009114930.1	sll1802	56.32	277	117	2	1	274	1	276	4e-107	317	[J] COG0090 Ribosomal protein L2
YP_009162999.1	ssr0482	50.62	81	40	0	1	81	1	81	9e-22	84.7	[J] COG0228 Ribosomal protein S16
YP_009163002.1	sll1326	71.06	501	145	0	1	501	1	501	0	745	[C] COG0056 F0F1-type ATP synthase, alpha subunit
YP_009163003.1	sll1324	25.99	177	131	0	1	177	1	177	1e-16	76.6	[C] COG0711 F0F1-type ATP synthase, subunit b
YP_009163004.1	asl0009	94.92	59	3	0	22	80	22	80	4e-32	110	[C] COG0636 F0F1-type ATP synthase, subunit c/Archaeal/vacuolar-type H+-ATPase, subunit K
YP_009163005.1	all0010	70.61	228	66	1	17	243	12	239	9e-102	301	[C] COG0356 F0F1-type ATP synthase, subunit a
YP_009163006.1	all4792	52.25	222	106	0	8	229	4	225	6e-89	268	[J] COG0052 Ribosomal protein S2
YP_009163007.1	sll1789	34.86	849	467	25	7	833	1	785	5e-125	425	[K] COG0086 DNA-directed RNA polymerase, beta' subunit/160 kD subunit
YP_009163008.1	alr1595	46	663	304	8	10	669	12	623	0	567	[K] COG0086 DNA-directed RNA polymerase, beta' subunit/160 kD subunit
YP_009163009.1	alr1594	47.57	1068	524	10	12	1053	27	1084	0	994	[K] COG0085 DNA-directed RNA polymerase, beta subunit/140 kD subunit
YP_009163015.1	slr0628	54	100	46	0	1	100	1	100	4e-31	109	[J] COG0199 Ribosomal protein S14
YP_009163018.1	slr0823	63.1	168	62	0	1	168	1	168	2e-74	225	[R] COG0457 FOG: TPR repeat
YP_009163019.1	slr0469	58.13	203	82	2	1	201	1	202	4e-80	242	[J] COG0522 Ribosomal protein S4 and related proteins
YP_009163020.1	all3840	55.77	156	69	0	3	158	20	175	4e-63	196	[C] COG0852 NADH:ubiquinone oxidoreductase 27 kD subunit
YP_009163022.1	slr1279	65.83	120	41	0	1	120	1	120	2e-52	166	[C] COG0838 NADH:ubiquinone oxidoreductase subunit 3 (chain A)
YP_009163023.1	slr1330	45.04	131	69	1	1	128	30	160	3e-35	124	[C] COG0355 F0F1-type ATP synthase, epsilon subunit (mitochondrial delta subunit)
YP_009163024.1	all5039	81.09	476	90	0	12	487	2	477	0	789	[C] COG0055 F0F1-type ATP synthase, beta subunit
YP_009163025.1	alr1524	85.38	472	69	0	4	475	5	476	0	847	[G] COG1850 Ribulose 1,5-bisphosphate carboxylase, large subunit
YP_009163026.1	sll0336	58.17	263	107	3	234	495	32	292	1e-102	315	[I] COG0777 Acetyl-CoA carboxylase beta subunit
YP_009163038.1	asl4452	61.54	65	24	1	1	65	1	64	9e-21	80.9	[J] COG0267 Ribosomal protein L33
YP_009163039.1	asl4451	53.73	67	31	0	14	80	4	70	8e-19	77.4	[J] COG0238 Ribosomal protein S18
YP_009163040.1	alr3428	50	112	54	1	1	112	1	110	8e-21	84.3	[J] COG0292 Ribosomal protein L20
YP_009163041.1	sll1096	83.74	123	20	0	1	123	1	123	2e-71	214	[J] COG0048 Ribosomal protein S12
YP_009163042.1	all4357	54.08	196	89	1	1	196	1	195	2e-75	231	[OU] COG0740 Protease subunit of ATP-dependent Clp proteases
YP_009163047.1	alr3421	83.72	215	35	0	1	215	1	215	4e-136	386	[C] COG1290 Cytochrome b subunit of the bc complex
YP_009163048.1	alr3422	81.25	160	30	0	1	160	1	160	8e-93	271	[C] COG1290 Cytochrome b subunit of the bc complex
YP_009163049.1	all4191	36.28	328	186	5	13	336	4	312	7e-67	218	[K] COG0202 DNA-directed RNA polymerase, alpha subunit/40 kD subunit
YP_009163050.1	sll1817	55.65	124	55	0	15	138	7	130	2e-45	149	[J] COG0100 Ribosomal protein S11
YP_009163051.1	asl4194	78.38	37	8	0	1	37	1	37	1e-14	63.2	[J] COG0257 Ribosomal protein L36
YP_009163052.1	ssl3441	60	65	26	0	9	73	2	66	3e-23	87.8	[J] COG0361 Translation initiation factor 1 (IF-1)
YP_009163053.1	all4202	51.16	129	63	0	4	132	5	133	4e-43	142	[J] COG0096 Ribosomal protein S8
YP_009163054.1	all4205	68.03	122	39	0	1	122	1	122	2e-59	184	[J] COG0093 Ribosomal protein L14
YP_009163055.1	all4208	72.18	133	37	0	1	133	1	133	4e-69	209	[J] COG0197 Ribosomal protein L16/L10E
YP_009163056.1	all4209	43.78	217	118	2	1	217	1	213	1e-51	172	[J] COG0092 Ribosomal protein S3
YP_009163057.1	all4210	53.27	107	50	0	8	114	6	112	4e-37	128	[J] COG0091 Ribosomal protein L22
YP_009163058.1	asl4211	67.39	92	30	0	1	92	1	92	3e-44	142	[J] COG0185 Ribosomal protein S19
YP_009163059.1	sll1802	56	275	117	2	7	278	3	276	2e-105	313	[J] COG0090 Ribosomal protein L2
YP_009163060.1	sll1801	38.1	84	52	0	2	85	12	95	7e-15	67.4	[J] COG0089 Ribosomal protein L23
YP_009163063.1	all4883	50.21	480	236	2	32	509	15	493	4e-159	468	[C] COG1007 NADH:ubiquinone oxidoreductase subunit 2 (chain N)
YP_009163065.1	slr0844	44.91	737	344	9	1	734	1	678	0	575	[CP] COG1009 NADH:ubiquinone oxidoreductase subunit 5 (chain L)/Multisubunit Na+/H+ antiporter, MnhA subunit
YP_009163066.1	asl3674	55.81	43	19	0	1	43	1	43	5e-07	44.3	[J] COG0333 Ribosomal protein L32
YP_009163067.1	all0936	42	350	171	4	1	318	1	350	6e-83	259	[O] COG0755 ABC-type transport system involved in cytochrome c biogenesis, permease component
YP_009163068.1	alr3957	57.64	484	203	2	6	488	2	484	0	563	[C] COG1008 NADH:ubiquinone oxidoreductase subunit 4 (chain M)
YP_009163069.1	asr3463	87.65	81	10	0	1	81	1	81	3e-49	154	[C] COG1145 Ferredoxin
YP_009163070.1	sll0522	59	100	41	0	1	100	3	102	2e-23	90.1	[C] COG0713 NADH:ubiquinone oxidoreductase subunit 11 or 4L (chain K)
YP_009163071.1	sll0521	43.37	166	83	3	11	176	14	168	3e-30	113	[C] COG0839 NADH:ubiquinone oxidoreductase subunit 6 (chain J)
YP_009163072.1	sll0520	68	150	48	0	10	159	11	160	2e-78	236	[C] COG1143 Formate hydrogenlyase subunit 6/NADH:ubiquinone oxidoreductase 23 kD subunit (chain I)
YP_009163073.1	sll0519	59.44	355	138	2	10	361	13	364	6e-151	436	[C] COG1005 NADH:ubiquinone oxidoreductase subunit 1 (chain H)
YP_009163074.1	alr3355	71.98	389	108	1	6	393	6	394	0	619	[C] COG0649 NADH:ubiquinone oxidoreductase 49 kD subunit 7
YP_009163075.1	FN1979	51.43	70	34	0	16	85	15	84	1e-16	71.6	[J] COG0184 Ribosomal protein S15P/S13E
YP_009163078.1	all4883	50.21	480	236	2	32	509	15	493	4e-159	468	[C] COG1007 NADH:ubiquinone oxidoreductase subunit 2 (chain N)
YP_009163081.1	sll1801	38.1	84	52	0	2	85	12	95	7e-15	67.4	[J] COG0089 Ribosomal protein L23
YP_009163082.1	sll1802	56	275	117	2	7	278	3	276	2e-105	313	[J] COG0090 Ribosomal protein L2
YP_009169332.1	sll1096	82.93	123	21	0	1	123	1	123	2e-70	211	[J] COG0048 Ribosomal protein S12
YP_009169333.1	slr0469	55.71	210	85	3	1	210	1	202	8e-77	234	[J] COG0522 Ribosomal protein S4 and related proteins
YP_009169338.1	all3840	55.13	156	70	0	3	158	20	175	3e-62	194	[C] COG0852 NADH:ubiquinone oxidoreductase 27 kD subunit
YP_009169339.1	all3841	68.56	194	61	0	1	194	16	209	3e-96	286	[C] COG0377 NADH:ubiquinone oxidoreductase 20 kD subunit and related Fe-S oxidoreductases
YP_009169340.1	slr1279	65.83	120	41	0	1	120	1	120	7e-52	164	[C] COG0838 NADH:ubiquinone oxidoreductase subunit 3 (chain A)
YP_009169341.1	sll1326	71.26	501	144	0	1	501	1	501	0	748	[C] COG0056 F0F1-type ATP synthase, alpha subunit
YP_009169342.1	sll1324	27.06	170	124	0	8	177	8	177	1e-17	79.3	[C] COG0711 F0F1-type ATP synthase, subunit b
YP_009169343.1	asl0009	94.92	59	3	0	22	80	22	80	4e-32	110	[C] COG0636 F0F1-type ATP synthase, subunit c/Archaeal/vacuolar-type H+-ATPase, subunit K
YP_009169344.1	all0010	70.61	228	66	1	17	243	12	239	3e-102	303	[C] COG0356 F0F1-type ATP synthase, subunit a
YP_009169345.1	all4792	54.95	222	100	0	8	229	4	225	3e-92	277	[J] COG0052 Ribosomal protein S2
YP_009169346.1	sll1789	34.51	849	466	22	7	831	1	783	2e-125	426	[K] COG0086 DNA-directed RNA polymerase, beta' subunit/160 kD subunit
YP_009169347.1	alr1595	46.26	668	295	11	10	669	12	623	0	567	[K] COG0086 DNA-directed RNA polymerase, beta' subunit/160 kD subunit
YP_009169348.1	alr1594	47.67	1072	517	11	12	1053	27	1084	0	998	[K] COG0085 DNA-directed RNA polymerase, beta subunit/140 kD subunit
YP_009169354.1	slr0628	53	100	47	0	1	100	1	100	7e-31	109	[J] COG0199 Ribosomal protein S14
YP_009169357.1	slr0823	63.1	168	62	0	1	168	1	168	3e-73	223	[R] COG0457 FOG: TPR repeat
YP_009169358.1	slr1330	45.8	131	68	1	1	128	30	160	1e-36	127	[C] COG0355 F0F1-type ATP synthase, epsilon subunit (mitochondrial delta subunit)
YP_009169359.1	all5039	81.51	476	88	0	14	489	2	477	0	796	[C] COG0055 F0F1-type ATP synthase, beta subunit
YP_009169360.1	alr1524	83.9	472	76	0	4	475	5	476	0	832	[G] COG1850 Ribulose 1,5-bisphosphate carboxylase, large subunit
YP_009169361.1	sll0336	57.98	257	106	2	216	472	32	286	1e-100	310	[I] COG0777 Acetyl-CoA carboxylase beta subunit
YP_009169373.1	asl4452	56.92	65	27	1	1	65	1	64	2e-18	74.7	[J] COG0267 Ribosomal protein L33
YP_009169374.1	asl4451	55.22	67	30	0	15	81	4	70	5e-20	80.5	[J] COG0238 Ribosomal protein S18
YP_009169375.1	BH3138	42.11	114	64	1	1	114	1	112	4e-22	87.8	[J] COG0292 Ribosomal protein L20
YP_009169376.1	sll1096	82.93	123	21	0	1	123	1	123	2e-70	211	[J] COG0048 Ribosomal protein S12
YP_009169377.1	all4357	53.89	193	87	2	1	192	1	192	2e-72	223	[OU] COG0740 Protease subunit of ATP-dependent Clp proteases
YP_009169382.1	alr3421	83.26	215	36	0	1	215	1	215	2e-135	384	[C] COG1290 Cytochrome b subunit of the bc complex
YP_009169383.1	alr3422	80.62	160	31	0	1	160	1	160	2e-92	271	[C] COG1290 Cytochrome b subunit of the bc complex
YP_009169384.1	all4191	34.56	327	190	5	13	335	4	310	6e-64	210	[K] COG0202 DNA-directed RNA polymerase, alpha subunit/40 kD subunit
YP_009169385.1	sll1817	56.59	129	53	1	10	138	5	130	6e-47	152	[J] COG0100 Ribosomal protein S11
YP_009169386.1	asl4194	78.38	37	8	0	1	37	1	37	6e-15	63.9	[J] COG0257 Ribosomal protein L36
YP_009169388.1	all4202	48.84	129	66	0	4	132	5	133	5e-40	135	[J] COG0096 Ribosomal protein S8
YP_009169389.1	all4205	69.67	122	37	0	1	122	1	122	1e-60	187	[J] COG0093 Ribosomal protein L14
YP_009169390.1	sll1805	73.48	132	35	0	1	132	1	132	1e-69	211	[J] COG0197 Ribosomal protein L16/L10E
YP_009169391.1	all4209	44.7	217	116	2	1	217	1	213	3e-53	176	[J] COG0092 Ribosomal protein S3
YP_009169392.1	sll1803	52.63	114	54	0	1	114	1	114	7e-40	135	[J] COG0091 Ribosomal protein L22
YP_009169393.1	asl4211	65.22	92	32	0	1	92	1	92	2e-42	138	[J] COG0185 Ribosomal protein S19
YP_009169394.1	sll1802	55.23	277	120	2	1	274	1	276	5e-104	309	[J] COG0090 Ribosomal protein L2
YP_009169395.1	sll1801	36.9	84	53	0	2	85	12	95	3e-14	65.5	[J] COG0089 Ribosomal protein L23
YP_009169397.1	all4883	50.21	480	236	2	32	509	15	493	4e-157	462	[C] COG1007 NADH:ubiquinone oxidoreductase subunit 2 (chain N)
YP_009169398.1	all4339	55.48	155	69	0	1	155	1	155	6e-60	187	[J] COG0049 Ribosomal protein S7
YP_009169400.1	all0936	40.91	352	170	4	1	316	1	350	1e-81	256	[O] COG0755 ABC-type transport system involved in cytochrome c biogenesis, permease component
YP_009169401.1	alr3957	56.29	485	208	3	3	485	5	487	0	552	[C] COG1008 NADH:ubiquinone oxidoreductase subunit 4 (chain M)
YP_009169402.1	asr3463	87.65	81	10	0	1	81	1	81	3e-49	154	[C] COG1145 Ferredoxin
YP_009169403.1	sll0522	59	100	41	0	1	100	3	102	3e-24	92	[C] COG0713 NADH:ubiquinone oxidoreductase subunit 11 or 4L (chain K)
YP_009169404.1	sll0521	42.17	166	85	3	11	176	14	168	1e-28	108	[C] COG0839 NADH:ubiquinone oxidoreductase subunit 6 (chain J)
YP_009169405.1	alr0224	63.01	173	64	0	1	173	1	173	2e-81	244	[C] COG1143 Formate hydrogenlyase subunit 6/NADH:ubiquinone oxidoreductase 23 kD subunit (chain I)
YP_009169406.1	sll0519	58.43	356	142	2	8	360	12	364	3e-150	434	[C] COG1005 NADH:ubiquinone oxidoreductase subunit 1 (chain H)
YP_009169407.1	alr3355	71.21	389	111	1	6	393	6	394	0	612	[C] COG0649 NADH:ubiquinone oxidoreductase 49 kD subunit 7
YP_009169408.1	FN1979	50	68	34	0	18	85	17	84	9e-16	69.3	[J] COG0184 Ribosomal protein S15P/S13E
YP_009169410.1	all4339	55.48	155	69	0	1	155	1	155	6e-60	187	[J] COG0049 Ribosomal protein S7
YP_009169411.1	all4883	50.21	480	236	2	32	509	15	493	4e-157	462	[C] COG1007 NADH:ubiquinone oxidoreductase subunit 2 (chain N)
YP_009169413.1	sll1801	36.9	84	53	0	2	85	12	95	3e-14	65.5	[J] COG0089 Ribosomal protein L23
YP_009169414.1	sll1802	55.23	277	120	2	1	274	1	276	5e-104	309	[J] COG0090 Ribosomal protein L2
YP_009169415.1	asl4211	65.22	92	32	0	1	92	1	92	2e-42	138	[J] COG0185 Ribosomal protein S19
YP_009169416.1	sll1803	52.63	114	54	0	1	114	1	114	7e-40	135	[J] COG0091 Ribosomal protein L22
YP_009169417.1	all4209	44.7	217	116	2	1	217	1	213	3e-53	176	[J] COG0092 Ribosomal protein S3
YP_009169418.1	sll1805	73.48	132	35	0	1	132	1	132	1e-69	211	[J] COG0197 Ribosomal protein L16/L10E
YP_009169419.1	all4205	69.67	122	37	0	1	122	1	122	1e-60	187	[J] COG0093 Ribosomal protein L14
YP_009169420.1	all4202	48.84	129	66	0	4	132	5	133	5e-40	135	[J] COG0096 Ribosomal protein S8
YP_009234365.1	all4340	82.11	123	22	0	1	123	1	123	2e-70	212	[J] COG0048 Ribosomal protein S12
YP_009234368.1	ssr0482	53.09	81	38	0	1	81	1	81	6e-23	87.8	[J] COG0228 Ribosomal protein S16
YP_009234371.1	sll1326	71.46	501	143	0	1	501	1	501	0	746	[C] COG0056 F0F1-type ATP synthase, alpha subunit
YP_009234373.1	asl0009	91.25	80	7	0	1	80	1	80	3e-32	111	[C] COG0636 F0F1-type ATP synthase, subunit c/Archaeal/vacuolar-type H+-ATPase, subunit K
YP_009234374.1	all0010	70.61	228	66	1	17	243	12	239	7e-100	296	[C] COG0356 F0F1-type ATP synthase, subunit a
YP_009234375.1	all4792	54.5	222	101	0	8	229	4	225	5e-90	271	[J] COG0052 Ribosomal protein S2
YP_009234376.1	sll1789	33.09	952	541	26	7	936	1	878	4e-125	425	[K] COG0086 DNA-directed RNA polymerase, beta' subunit/160 kD subunit
YP_009234377.1	alr1595	46.25	666	299	11	10	670	12	623	0	569	[K] COG0086 DNA-directed RNA polymerase, beta' subunit/160 kD subunit
YP_009234378.1	alr1594	47.53	1075	524	10	7	1053	22	1084	0	999	[K] COG0085 DNA-directed RNA polymerase, beta subunit/140 kD subunit
YP_009234384.1	slr0628	53	100	47	0	1	100	1	100	3e-30	107	[J] COG0199 Ribosomal protein S14
YP_009234387.1	slr0823	62.5	168	63	0	1	168	1	168	3e-72	220	[R] COG0457 FOG: TPR repeat
YP_009234388.1	slr0469	58.05	205	79	3	1	201	1	202	3e-80	243	[J] COG0522 Ribosomal protein S4 and related proteins
YP_009234389.1	all3840	55.77	156	69	0	3	158	20	175	1e-61	192	[C] COG0852 NADH:ubiquinone oxidoreductase 27 kD subunit
YP_009234390.1	slr1280	72.22	180	50	0	15	194	34	213	2e-96	286	[C] COG0377 NADH:ubiquinone oxidoreductase 20 kD subunit and related Fe-S oxidoreductases
YP_009234391.1	slr1279	63.33	120	44	0	1	120	1	120	1e-49	158	[C] COG0838 NADH:ubiquinone oxidoreductase subunit 3 (chain A)
YP_009234392.1	slr1330	43.51	131	71	1	1	128	30	160	2e-35	124	[C] COG0355 F0F1-type ATP synthase, epsilon subunit (mitochondrial delta subunit)
YP_009234393.1	all5039	80.21	480	95	0	12	491	2	481	0	788	[C] COG0055 F0F1-type ATP synthase, beta subunit
YP_009234394.1	alr1524	84.96	472	71	0	4	475	5	476	0	845	[G] COG1850 Ribulose 1,5-bisphosphate carboxylase, large subunit
YP_009234395.1	sll0336	56.83	271	110	3	226	491	32	300	8e-103	316	[I] COG0777 Acetyl-CoA carboxylase beta subunit
YP_009234407.1	asl4452	61.54	65	24	1	1	65	1	64	1e-20	80.5	[J] COG0267 Ribosomal protein L33
YP_009234408.1	asl4451	55.22	67	30	0	15	81	4	70	6e-20	80.1	[J] COG0238 Ribosomal protein S18
YP_009234409.1	alr3428	57.84	102	41	1	1	102	1	100	4e-23	90.5	[J] COG0292 Ribosomal protein L20
YP_009234410.1	all4340	82.11	123	22	0	1	123	1	123	2e-70	212	[J] COG0048 Ribosomal protein S12
YP_009234411.1	all4357	54.08	196	89	1	1	196	1	195	6e-76	231	[OU] COG0740 Protease subunit of ATP-dependent Clp proteases
YP_009234416.1	alr3421	82.79	215	37	0	1	215	1	215	9e-134	380	[C] COG1290 Cytochrome b subunit of the bc complex
YP_009234417.1	alr3422	80	160	32	0	1	160	1	160	1e-91	268	[C] COG1290 Cytochrome b subunit of the bc complex
YP_009234418.1	all4191	35.45	330	188	4	13	338	4	312	2e-66	216	[K] COG0202 DNA-directed RNA polymerase, alpha subunit/40 kD subunit
YP_009234419.1	CC1271	50.72	138	59	2	1	138	1	129	5e-45	147	[J] COG0100 Ribosomal protein S11
YP_009234420.1	asl4194	78.38	37	8	0	1	37	1	37	1e-14	63.2	[J] COG0257 Ribosomal protein L36
YP_009234421.1	asl4195	62.16	74	27	1	1	73	1	74	2e-25	93.6	[J] COG0361 Translation initiation factor 1 (IF-1)
YP_009234422.1	all4202	50.39	129	64	0	4	132	5	133	8e-43	142	[J] COG0096 Ribosomal protein S8
YP_009234423.1	all4205	68.85	122	38	0	1	122	1	122	9e-60	184	[J] COG0093 Ribosomal protein L14
YP_009234424.1	sll1805	74.24	132	34	0	1	132	1	132	2e-70	213	[J] COG0197 Ribosomal protein L16/L10E
YP_009234425.1	all4209	44.24	217	117	2	1	217	1	213	9e-53	175	[J] COG0092 Ribosomal protein S3
YP_009234426.1	sll1803	52.5	120	57	0	1	120	1	120	4e-41	139	[J] COG0091 Ribosomal protein L22
YP_009234427.1	asl4211	66.3	92	31	0	1	92	1	92	5e-44	142	[J] COG0185 Ribosomal protein S19
YP_009234428.1	sll1802	55.96	277	118	2	1	274	1	276	7e-107	316	[J] COG0090 Ribosomal protein L2
YP_009234429.1	sll1801	36.47	85	53	1	2	86	12	95	1e-12	61.2	[J] COG0089 Ribosomal protein L23
YP_009234431.1	all4883	50.21	480	236	2	32	509	15	493	3e-157	463	[C] COG1007 NADH:ubiquinone oxidoreductase subunit 2 (chain N)
YP_009234432.1	all4339	56.77	155	67	0	1	155	1	155	1e-60	189	[J] COG0049 Ribosomal protein S7
YP_009234433.1	slr0844	44.86	740	346	7	1	740	1	678	0	584	[CP] COG1009 NADH:ubiquinone oxidoreductase subunit 5 (chain L)/Multisubunit Na+/H+ antiporter, MnhA subunit
YP_009234434.1	asl3674	53.49	43	20	0	1	43	1	43	5e-06	41.2	[J] COG0333 Ribosomal protein L32
YP_009234435.1	sll1513	41.72	338	172	5	1	318	1	333	4e-81	254	[O] COG0755 ABC-type transport system involved in cytochrome c biogenesis, permease component
YP_009234436.1	alr3957	55.81	482	211	2	5	485	7	487	0	544	[C] COG1008 NADH:ubiquinone oxidoreductase subunit 4 (chain M)
YP_009234437.1	asr3463	88.89	81	9	0	1	81	1	81	7e-50	156	[C] COG1145 Ferredoxin
YP_009234438.1	sll0522	58	100	42	0	1	100	3	102	2e-22	87.4	[C] COG0713 NADH:ubiquinone oxidoreductase subunit 11 or 4L (chain K)
YP_009234439.1	sll0521	43.87	155	79	2	22	176	22	168	2e-30	113	[C] COG0839 NADH:ubiquinone oxidoreductase subunit 6 (chain J)
YP_009234440.1	alr0224	61.4	171	66	0	1	171	1	171	3e-78	236	[C] COG1143 Formate hydrogenlyase subunit 6/NADH:ubiquinone oxidoreductase 23 kD subunit (chain I)
YP_009234441.1	sll0519	61.54	338	127	1	26	360	27	364	1e-150	435	[C] COG1005 NADH:ubiquinone oxidoreductase subunit 1 (chain H)
YP_009234442.1	alr3355	71.72	389	109	1	6	393	6	394	0	619	[C] COG0649 NADH:ubiquinone oxidoreductase 49 kD subunit 7
YP_009234443.1	FN1979	50	70	35	0	16	85	15	84	5e-16	69.7	[J] COG0184 Ribosomal protein S15P/S13E
YP_009234445.1	all4339	56.77	155	67	0	1	155	1	155	1e-60	189	[J] COG0049 Ribosomal protein S7
YP_009234446.1	all4883	50.21	480	236	2	32	509	15	493	3e-157	463	[C] COG1007 NADH:ubiquinone oxidoreductase subunit 2 (chain N)
YP_009234448.1	sll1801	36.47	85	53	1	2	86	12	95	1e-12	61.2	[J] COG0089 Ribosomal protein L23
YP_009234449.1	sll1802	55.96	277	118	2	1	274	1	276	7e-107	316	[J] COG0090 Ribosomal protein L2
YP_009234450.1	sll1096	82.11	123	22	0	1	123	1	123	1e-69	209	[J] COG0048 Ribosomal protein S12
YP_009234453.1	ssr0482	48.78	82	42	0	1	82	1	82	2e-22	86.7	[J] COG0228 Ribosomal protein S16
YP_009234456.1	all0005	72.8	500	134	2	3	501	4	502	0	745	[C] COG0056 F0F1-type ATP synthase, alpha subunit
YP_009234458.1	asl0009	94.92	59	3	0	22	80	22	80	4e-32	110	[C] COG0636 F0F1-type ATP synthase, subunit c/Archaeal/vacuolar-type H+-ATPase, subunit K
YP_009234459.1	sll1322	69.36	235	70	2	14	246	38	272	1e-101	302	[C] COG0356 F0F1-type ATP synthase, subunit a
YP_009234460.1	all4792	50.45	222	110	0	8	229	4	225	3e-84	256	[J] COG0052 Ribosomal protein S2
YP_009234461.1	sll1789	32.43	959	553	25	7	941	1	888	2e-128	435	[K] COG0086 DNA-directed RNA polymerase, beta' subunit/160 kD subunit
YP_009234462.1	alr1595	45.7	663	306	7	10	669	12	623	0	559	[K] COG0086 DNA-directed RNA polymerase, beta' subunit/160 kD subunit
YP_009234463.1	alr1594	46.88	1075	522	12	12	1054	27	1084	0	979	[K] COG0085 DNA-directed RNA polymerase, beta subunit/140 kD subunit
YP_009234469.1	slr0628	53	100	47	0	1	100	1	100	2e-29	105	[J] COG0199 Ribosomal protein S14
YP_009234472.1	slr0823	62.65	166	62	0	1	166	1	166	1e-72	221	[R] COG0457 FOG: TPR repeat
YP_009234473.1	slr0469	56.67	210	78	3	1	206	1	201	1e-76	234	[J] COG0522 Ribosomal protein S4 and related proteins
YP_009234474.1	all3840	55.13	156	70	0	3	158	20	175	2e-62	194	[C] COG0852 NADH:ubiquinone oxidoreductase 27 kD subunit
YP_009234475.1	all3841	68.04	194	62	0	1	194	16	209	5e-95	283	[C] COG0377 NADH:ubiquinone oxidoreductase 20 kD subunit and related Fe-S oxidoreductases
YP_009234476.1	slr1279	64.17	120	43	0	1	120	1	120	4e-50	159	[C] COG0838 NADH:ubiquinone oxidoreductase subunit 3 (chain A)
YP_009234477.1	slr1330	42.75	131	72	1	1	128	30	160	5e-33	117	[C] COG0355 F0F1-type ATP synthase, epsilon subunit (mitochondrial delta subunit)
YP_009234478.1	all5039	81.3	476	89	0	12	487	2	477	0	791	[C] COG0055 F0F1-type ATP synthase, beta subunit
YP_009234479.1	alr1524	85.59	472	68	0	4	475	5	476	0	847	[G] COG1850 Ribulose 1,5-bisphosphate carboxylase, large subunit
YP_009234480.1	sll0336	46.89	322	121	3	193	509	32	308	4e-91	286	[I] COG0777 Acetyl-CoA carboxylase beta subunit
YP_009234492.1	asl4452	56.92	65	27	1	1	65	1	64	7e-18	73.6	[J] COG0267 Ribosomal protein L33
YP_009234493.1	asl4451	50.77	65	32	0	14	78	4	68	1e-16	72	[J] COG0238 Ribosomal protein S18
YP_009234494.1	BH3138	42.11	114	64	1	1	114	1	112	1e-19	81.3	[J] COG0292 Ribosomal protein L20
YP_009234495.1	sll1096	82.11	123	22	0	1	123	1	123	1e-69	209	[J] COG0048 Ribosomal protein S12
YP_009234496.1	slr0165	41.99	181	104	1	125	304	20	200	7e-45	155	[OU] COG0740 Protease subunit of ATP-dependent Clp proteases
YP_009234501.1	alr3421	83.26	215	36	0	1	215	1	215	2e-136	387	[C] COG1290 Cytochrome b subunit of the bc complex
YP_009234502.1	alr3422	80.62	160	31	0	1	160	1	160	3e-92	270	[C] COG1290 Cytochrome b subunit of the bc complex
YP_009234503.1	all4191	36.28	317	177	4	13	323	4	301	8e-65	212	[K] COG0202 DNA-directed RNA polymerase, alpha subunit/40 kD subunit
YP_009234504.1	aq_073	54.31	116	53	0	25	140	10	125	6e-45	147	[J] COG0100 Ribosomal protein S11
YP_009234505.1	sml0006	78.95	38	7	1	1	37	1	38	2e-14	62.4	[J] COG0257 Ribosomal protein L36
YP_009234506.1	all4202	48.85	131	67	0	2	132	3	133	2e-42	141	[J] COG0096 Ribosomal protein S8
YP_009234507.1	all4205	66.39	122	41	0	1	122	1	122	1e-57	179	[J] COG0093 Ribosomal protein L14
YP_009234508.1	sll1805	72.73	132	36	0	1	132	1	132	3e-69	210	[J] COG0197 Ribosomal protein L16/L10E
YP_009234509.1	all4209	41.36	220	122	2	1	220	1	213	2e-51	171	[J] COG0092 Ribosomal protein S3
YP_009234510.1	all4210	52.34	107	51	0	8	114	6	112	2e-36	126	[J] COG0091 Ribosomal protein L22
YP_009234511.1	asl4211	69.57	92	28	0	1	92	1	92	1e-45	146	[J] COG0185 Ribosomal protein S19
YP_009234512.1	sll1802	56.68	277	116	2	1	274	1	276	1e-107	318	[J] COG0090 Ribosomal protein L2
YP_009234513.1	BMEI0759	44.05	84	47	0	2	85	8	91	6e-14	65.1	[J] COG0089 Ribosomal protein L23
YP_009234515.1	all4883	50.42	480	235	2	32	509	15	493	2e-159	469	[C] COG1007 NADH:ubiquinone oxidoreductase subunit 2 (chain N)
YP_009234516.1	all4339	43.59	117	54	1	1	105	1	117	7e-27	100	[J] COG0049 Ribosomal protein S7
YP_009234517.1	slr0844	45.92	736	338	9	1	735	1	677	0	574	[CP] COG1009 NADH:ubiquinone oxidoreductase subunit 5 (chain L)/Multisubunit Na+/H+ antiporter, MnhA subunit
YP_009234519.1	all0936	41.14	350	172	4	1	316	1	350	1e-80	253	[O] COG0755 ABC-type transport system involved in cytochrome c biogenesis, permease component
YP_009234520.1	alr3957	57.59	481	202	2	3	482	5	484	0	557	[C] COG1008 NADH:ubiquinone oxidoreductase subunit 4 (chain M)
YP_009234521.1	asr3463	88.89	81	9	0	1	81	1	81	7e-50	156	[C] COG1145 Ferredoxin
YP_009234522.1	sll0522	57	100	43	0	1	100	3	102	2e-22	87.4	[C] COG0713 NADH:ubiquinone oxidoreductase subunit 11 or 4L (chain K)
YP_009234523.1	sll0521	43.11	167	82	5	11	176	14	168	3e-29	110	[C] COG0839 NADH:ubiquinone oxidoreductase subunit 6 (chain J)
YP_009234524.1	alr0224	61.31	168	65	0	1	168	1	168	1e-77	234	[C] COG1143 Formate hydrogenlyase subunit 6/NADH:ubiquinone oxidoreductase 23 kD subunit (chain I)
YP_009234525.1	sll0519	59.61	359	132	4	13	361	9	364	2e-148	429	[C] COG1005 NADH:ubiquinone oxidoreductase subunit 1 (chain H)
YP_009234526.1	alr3355	70.95	389	112	1	6	393	6	394	0	605	[C] COG0649 NADH:ubiquinone oxidoreductase 49 kD subunit 7
YP_009234527.1	FN1979	48.57	70	36	0	15	84	15	84	3e-15	68.2	[J] COG0184 Ribosomal protein S15P/S13E
YP_009234529.1	all4339	43.59	117	54	1	1	105	1	117	7e-27	100	[J] COG0049 Ribosomal protein S7
YP_009234530.1	all4883	50.42	480	235	2	32	509	15	493	2e-159	469	[C] COG1007 NADH:ubiquinone oxidoreductase subunit 2 (chain N)
YP_009234532.1	BMEI0759	44.05	84	47	0	2	85	8	91	6e-14	65.1	[J] COG0089 Ribosomal protein L23
YP_009234533.1	sll1802	56.68	277	116	2	1	274	1	276	1e-107	318	[J] COG0090 Ribosomal protein L2
YP_009234534.1	all4340	82.11	123	22	0	1	123	1	123	2e-70	212	[J] COG0048 Ribosomal protein S12
YP_009234537.1	ssr0482	51.22	82	40	0	1	82	1	82	2e-22	86.3	[J] COG0228 Ribosomal protein S16
YP_009234540.1	sll1326	71.66	501	142	0	1	501	1	501	0	748	[C] COG0056 F0F1-type ATP synthase, alpha subunit
YP_009234542.1	asl0009	91.25	80	7	0	1	80	1	80	3e-32	111	[C] COG0636 F0F1-type ATP synthase, subunit c/Archaeal/vacuolar-type H+-ATPase, subunit K
YP_009234543.1	all0010	70.61	228	66	1	17	243	12	239	3e-101	300	[C] COG0356 F0F1-type ATP synthase, subunit a
YP_009234544.1	all4792	53.15	222	104	0	8	229	4	225	3e-90	272	[J] COG0052 Ribosomal protein S2
YP_009234545.1	sll1789	34.91	848	464	24	7	831	1	783	1e-123	421	[K] COG0086 DNA-directed RNA polymerase, beta' subunit/160 kD subunit
YP_009234546.1	alr1595	45.66	668	303	9	10	673	12	623	0	555	[K] COG0086 DNA-directed RNA polymerase, beta' subunit/160 kD subunit
YP_009234547.1	sll1787	47.27	1062	536	10	6	1053	3	1054	0	996	[K] COG0085 DNA-directed RNA polymerase, beta subunit/140 kD subunit
YP_009234553.1	slr0628	53	100	47	0	1	100	1	100	1e-30	108	[J] COG0199 Ribosomal protein S14
YP_009234556.1	slr0823	61.9	168	64	0	1	168	1	168	1e-70	216	[R] COG0457 FOG: TPR repeat
YP_009234557.1	slr0469	59.02	205	77	3	1	201	1	202	1e-81	246	[J] COG0522 Ribosomal protein S4 and related proteins
YP_009234558.1	all3840	55.77	156	69	0	3	158	20	175	4e-63	196	[C] COG0852 NADH:ubiquinone oxidoreductase 27 kD subunit
YP_009234559.1	all3841	68.56	194	61	0	1	194	16	209	7e-97	288	[C] COG0377 NADH:ubiquinone oxidoreductase 20 kD subunit and related Fe-S oxidoreductases
YP_009234560.1	slr1279	62.5	120	45	0	1	120	1	120	1e-48	156	[C] COG0838 NADH:ubiquinone oxidoreductase subunit 3 (chain A)
YP_009234561.1	slr1330	42.75	131	72	1	1	128	30	160	2e-34	121	[C] COG0355 F0F1-type ATP synthase, epsilon subunit (mitochondrial delta subunit)
YP_009234562.1	all5039	80.83	480	92	0	12	491	2	481	0	796	[C] COG0055 F0F1-type ATP synthase, beta subunit
YP_009234563.1	alr1524	84.32	472	74	0	4	475	5	476	0	839	[G] COG1850 Ribulose 1,5-bisphosphate carboxylase, large subunit
YP_009234564.1	sll0336	57.2	271	109	3	229	494	32	300	1e-103	318	[I] COG0777 Acetyl-CoA carboxylase beta subunit
YP_009234576.1	asl4452	60	65	25	1	1	65	1	64	2e-20	79.7	[J] COG0267 Ribosomal protein L33
YP_009234577.1	asl4451	53.73	67	31	0	15	81	4	70	5e-19	77.8	[J] COG0238 Ribosomal protein S18
YP_009234578.1	alr3428	58.82	102	40	1	1	102	1	100	2e-23	91.3	[J] COG0292 Ribosomal protein L20
YP_009234579.1	all4340	82.11	123	22	0	1	123	1	123	2e-70	212	[J] COG0048 Ribosomal protein S12
YP_009234580.1	all4357	53.57	196	90	1	1	196	1	195	8e-75	229	[OU] COG0740 Protease subunit of ATP-dependent Clp proteases
YP_009234585.1	alr3421	83.26	215	36	0	1	215	1	215	1e-134	382	[C] COG1290 Cytochrome b subunit of the bc complex
YP_009234586.1	alr3422	80.62	160	31	0	1	160	1	160	2e-92	271	[C] COG1290 Cytochrome b subunit of the bc complex
YP_009234587.1	all4191	36.06	330	186	5	13	338	4	312	6e-67	218	[K] COG0202 DNA-directed RNA polymerase, alpha subunit/40 kD subunit
YP_009234588.1	sll1817	56.45	124	54	0	15	138	7	130	3e-46	151	[J] COG0100 Ribosomal protein S11
YP_009234589.1	asl4194	78.38	37	8	0	1	37	1	37	1e-14	63.2	[J] COG0257 Ribosomal protein L36
YP_009234590.1	asl4195	62.16	74	27	1	1	73	1	74	2e-25	93.6	[J] COG0361 Translation initiation factor 1 (IF-1)
YP_009234591.1	all4202	50.39	129	64	0	4	132	5	133	4e-42	140	[J] COG0096 Ribosomal protein S8
YP_009234592.1	all4205	69.67	122	37	0	1	122	1	122	4e-60	185	[J] COG0093 Ribosomal protein L14
YP_009234593.1	sll1805	74.24	132	34	0	1	132	1	132	9e-71	213	[J] COG0197 Ribosomal protein L16/L10E
YP_009234594.1	all4209	44.7	217	116	2	1	217	1	213	5e-53	176	[J] COG0092 Ribosomal protein S3
YP_009234595.1	sll1803	48.33	120	62	0	1	120	1	120	7e-37	128	[J] COG0091 Ribosomal protein L22
YP_009234596.1	asl4211	65.22	92	32	0	1	92	1	92	2e-43	140	[J] COG0185 Ribosomal protein S19
YP_009234597.1	sll1802	55.6	277	119	2	1	274	1	276	2e-105	313	[J] COG0090 Ribosomal protein L2
YP_009234598.1	sll1801	36.9	84	53	0	2	85	12	95	3e-14	65.5	[J] COG0089 Ribosomal protein L23
YP_009234600.1	all4883	49.58	480	239	2	32	509	15	493	4e-156	460	[C] COG1007 NADH:ubiquinone oxidoreductase subunit 2 (chain N)
YP_009234601.1	all4339	56.77	155	67	0	1	155	1	155	4e-61	190	[J] COG0049 Ribosomal protein S7
YP_009234602.1	slr0844	44.78	737	347	9	1	736	1	678	0	573	[CP] COG1009 NADH:ubiquinone oxidoreductase subunit 5 (chain L)/Multisubunit Na+/H+ antiporter, MnhA subunit
YP_009234603.1	asl3674	50.98	51	23	1	1	51	1	49	4e-06	41.6	[J] COG0333 Ribosomal protein L32
YP_009234604.1	sll1513	42.31	338	170	6	1	318	1	333	1e-79	250	[O] COG0755 ABC-type transport system involved in cytochrome c biogenesis, permease component
YP_009234605.1	alr3957	55.99	484	211	2	3	485	5	487	0	553	[C] COG1008 NADH:ubiquinone oxidoreductase subunit 4 (chain M)
YP_009234606.1	asr3463	88.89	81	9	0	1	81	1	81	7e-50	156	[C] COG1145 Ferredoxin
YP_009234607.1	sll0522	58	100	42	0	1	100	3	102	1e-22	88.2	[C] COG0713 NADH:ubiquinone oxidoreductase subunit 11 or 4L (chain K)
YP_009234608.1	sll0521	43.23	155	80	2	22	176	22	168	4e-30	112	[C] COG0839 NADH:ubiquinone oxidoreductase subunit 6 (chain J)
YP_009234609.1	alr0224	65.19	158	55	0	1	158	1	158	4e-77	233	[C] COG1143 Formate hydrogenlyase subunit 6/NADH:ubiquinone oxidoreductase 23 kD subunit (chain I)
YP_009234610.1	sll0519	57.62	361	147	2	3	360	7	364	4e-149	431	[C] COG1005 NADH:ubiquinone oxidoreductase subunit 1 (chain H)
YP_009234611.1	alr3355	72.24	389	107	1	6	393	6	394	0	620	[C] COG0649 NADH:ubiquinone oxidoreductase 49 kD subunit 7
YP_009234612.1	asl0749	48.53	68	35	0	18	85	21	88	3e-16	70.5	[J] COG0184 Ribosomal protein S15P/S13E
YP_009234614.1	all4339	56.77	155	67	0	1	155	1	155	4e-61	190	[J] COG0049 Ribosomal protein S7
YP_009234615.1	all4883	49.58	480	239	2	32	509	15	493	4e-156	460	[C] COG1007 NADH:ubiquinone oxidoreductase subunit 2 (chain N)
YP_009234617.1	sll1801	36.9	84	53	0	2	85	12	95	3e-14	65.5	[J] COG0089 Ribosomal protein L23
YP_009234618.1	sll1802	55.6	277	119	2	1	274	1	276	2e-105	313	[J] COG0090 Ribosomal protein L2
YP_009234788.1	sll1096	82.11	123	22	0	1	123	1	123	3e-70	211	[J] COG0048 Ribosomal protein S12
YP_009234791.1	ssr0482	51.85	81	39	0	1	81	1	81	2e-22	87	[J] COG0228 Ribosomal protein S16
YP_009234794.1	sll1326	71.46	501	143	0	1	501	1	501	0	750	[C] COG0056 F0F1-type ATP synthase, alpha subunit
YP_009234796.1	asl0009	91.25	80	7	0	1	80	1	80	3e-32	111	[C] COG0636 F0F1-type ATP synthase, subunit c/Archaeal/vacuolar-type H+-ATPase, subunit K
YP_009234797.1	all0010	70.61	228	66	1	17	243	12	239	9e-101	299	[C] COG0356 F0F1-type ATP synthase, subunit a
YP_009234798.1	all4792	53.15	222	104	0	8	229	4	225	8e-90	271	[J] COG0052 Ribosomal protein S2
YP_009234799.1	sll1789	33.99	868	473	25	7	847	1	795	3e-120	411	[K] COG0086 DNA-directed RNA polymerase, beta' subunit/160 kD subunit
YP_009234800.1	alr1595	46.18	667	297	10	10	669	12	623	0	561	[K] COG0086 DNA-directed RNA polymerase, beta' subunit/160 kD subunit
YP_009234801.1	alr1594	47.11	1072	527	10	10	1053	25	1084	0	989	[K] COG0085 DNA-directed RNA polymerase, beta subunit/140 kD subunit
YP_009234807.1	slr0628	52	100	48	0	1	100	1	100	6e-29	104	[J] COG0199 Ribosomal protein S14
YP_009234810.1	slr0823	63.25	166	61	0	1	166	1	166	6e-73	222	[R] COG0457 FOG: TPR repeat
YP_009234811.1	slr0469	57.56	205	80	3	1	201	1	202	8e-79	239	[J] COG0522 Ribosomal protein S4 and related proteins
YP_009234812.1	all3840	56.41	156	68	0	3	158	20	175	4e-64	199	[C] COG0852 NADH:ubiquinone oxidoreductase 27 kD subunit
YP_009234813.1	slr1280	70.59	187	55	0	15	201	34	220	1e-96	287	[C] COG0377 NADH:ubiquinone oxidoreductase 20 kD subunit and related Fe-S oxidoreductases
YP_009234814.1	slr1279	61.67	120	46	0	1	120	1	120	7e-48	154	[C] COG0838 NADH:ubiquinone oxidoreductase subunit 3 (chain A)
YP_009234815.1	slr1330	46.56	131	66	2	1	128	30	159	1e-35	124	[C] COG0355 F0F1-type ATP synthase, epsilon subunit (mitochondrial delta subunit)
YP_009234816.1	all5039	80.67	481	93	0	12	492	2	482	0	789	[C] COG0055 F0F1-type ATP synthase, beta subunit
YP_009234817.1	alr1524	84.53	472	73	0	4	475	5	476	0	842	[G] COG1850 Ribulose 1,5-bisphosphate carboxylase, large subunit
YP_009234818.1	sll0336	56.46	271	111	3	232	497	32	300	8e-103	316	[I] COG0777 Acetyl-CoA carboxylase beta subunit
YP_009234830.1	asl4452	61.54	65	24	1	1	65	1	64	8e-21	80.9	[J] COG0267 Ribosomal protein L33
YP_009234831.1	asl4451	53.73	67	31	0	15	81	4	70	9e-19	77.4	[J] COG0238 Ribosomal protein S18
YP_009234832.1	PA2741	45.95	111	58	1	1	111	1	109	4e-23	90.5	[J] COG0292 Ribosomal protein L20
YP_009234833.1	sll1096	82.11	123	22	0	1	123	1	123	3e-70	211	[J] COG0048 Ribosomal protein S12
YP_009234834.1	all4357	54.4	193	87	1	1	193	1	192	1e-74	228	[OU] COG0740 Protease subunit of ATP-dependent Clp proteases
YP_009234839.1	alr3421	83.26	215	36	0	1	215	1	215	1e-134	382	[C] COG1290 Cytochrome b subunit of the bc complex
YP_009234840.1	alr3422	80.62	160	31	0	1	160	1	160	5e-92	270	[C] COG1290 Cytochrome b subunit of the bc complex
YP_009234841.1	all4191	35.45	330	188	5	13	338	4	312	2e-66	216	[K] COG0202 DNA-directed RNA polymerase, alpha subunit/40 kD subunit
YP_009234842.1	sll1817	54.84	124	56	0	15	138	7	130	2e-46	151	[J] COG0100 Ribosomal protein S11
YP_009234843.1	asl4194	78.38	37	8	0	1	37	1	37	1e-14	63.2	[J] COG0257 Ribosomal protein L36
YP_009234844.1	asl4195	62.16	74	27	1	1	73	1	74	1e-25	94	[J] COG0361 Translation initiation factor 1 (IF-1)
YP_009234845.1	all4202	48.85	131	67	0	2	132	3	133	6e-42	140	[J] COG0096 Ribosomal protein S8
YP_009234846.1	all4205	68.03	122	39	0	1	122	1	122	9e-59	182	[J] COG0093 Ribosomal protein L14
YP_009234847.1	sll1805	73.48	132	35	0	1	132	1	132	1e-69	211	[J] COG0197 Ribosomal protein L16/L10E
YP_009234848.1	all4209	43.93	214	116	2	1	214	1	210	4e-51	171	[J] COG0092 Ribosomal protein S3
YP_009234849.1	sll1803	50.83	120	59	0	1	120	1	120	2e-39	134	[J] COG0091 Ribosomal protein L22
YP_009234850.1	asl4211	67.82	87	28	0	1	87	1	87	1e-41	135	[J] COG0185 Ribosomal protein S19
YP_009234851.1	sll1802	55.23	277	120	2	1	274	1	276	3e-104	310	[J] COG0090 Ribosomal protein L2
YP_009234852.1	sll1801	38.1	84	52	0	2	85	12	95	2e-15	68.9	[J] COG0089 Ribosomal protein L23
YP_009234854.1	all4883	49.69	487	238	3	27	509	10	493	2e-155	458	[C] COG1007 NADH:ubiquinone oxidoreductase subunit 2 (chain N)
YP_009234855.1	all4339	56.77	155	67	0	1	155	1	155	4e-61	190	[J] COG0049 Ribosomal protein S7
YP_009234856.1	alr3956	44.51	719	356	8	1	717	1	678	0	559	[CP] COG1009 NADH:ubiquinone oxidoreductase subunit 5 (chain L)/Multisubunit Na+/H+ antiporter, MnhA subunit
YP_009234858.1	all0936	40.62	352	175	4	1	320	1	350	4e-84	262	[O] COG0755 ABC-type transport system involved in cytochrome c biogenesis, permease component
YP_009234859.1	alr3957	56.96	481	205	2	3	482	5	484	0	552	[C] COG1008 NADH:ubiquinone oxidoreductase subunit 4 (chain M)
YP_009234860.1	asr3463	88.89	81	9	0	1	81	1	81	7e-50	156	[C] COG1145 Ferredoxin
YP_009234861.1	alr0226	58	100	42	0	1	100	1	100	1e-22	88.2	[C] COG0713 NADH:ubiquinone oxidoreductase subunit 11 or 4L (chain K)
YP_009234862.1	sll0521	45.28	159	78	3	19	176	18	168	2e-31	116	[C] COG0839 NADH:ubiquinone oxidoreductase subunit 6 (chain J)
YP_009234863.1	alr0224	66.88	157	52	0	10	166	10	166	6e-80	241	[C] COG1143 Formate hydrogenlyase subunit 6/NADH:ubiquinone oxidoreductase 23 kD subunit (chain I)
YP_009234864.1	sll0519	60.65	338	130	1	26	360	27	364	4e-148	429	[C] COG1005 NADH:ubiquinone oxidoreductase subunit 1 (chain H)
YP_009234865.1	alr3355	71.47	389	110	1	6	393	6	394	0	609	[C] COG0649 NADH:ubiquinone oxidoreductase 49 kD subunit 7
YP_009234866.1	asl0749	44.93	69	38	0	18	86	21	89	1e-15	68.9	[J] COG0184 Ribosomal protein S15P/S13E
YP_009234868.1	all4339	56.77	155	67	0	1	155	1	155	4e-61	190	[J] COG0049 Ribosomal protein S7
YP_009234869.1	all4883	49.69	487	238	3	27	509	10	493	2e-155	458	[C] COG1007 NADH:ubiquinone oxidoreductase subunit 2 (chain N)
YP_009234871.1	sll1801	38.1	84	52	0	2	85	12	95	2e-15	68.9	[J] COG0089 Ribosomal protein L23
YP_009234872.1	sll1802	55.23	277	120	2	1	274	1	276	3e-104	310	[J] COG0090 Ribosomal protein L2
YP_009234961.1	all4340	82.11	123	22	0	1	123	1	123	2e-70	212	[J] COG0048 Ribosomal protein S12
YP_009234964.1	ssr0482	52.5	80	38	0	1	80	1	80	4e-22	85.5	[J] COG0228 Ribosomal protein S16
YP_009234967.1	sll1326	72.26	501	139	0	1	501	1	501	0	755	[C] COG0056 F0F1-type ATP synthase, alpha subunit
YP_009234969.1	asl0009	94.92	59	3	0	22	80	22	80	4e-32	110	[C] COG0636 F0F1-type ATP synthase, subunit c/Archaeal/vacuolar-type H+-ATPase, subunit K
YP_009234970.1	all0010	71.49	228	64	1	17	243	12	239	2e-102	303	[C] COG0356 F0F1-type ATP synthase, subunit a
YP_009234971.1	all4792	54.5	222	101	0	8	229	4	225	1e-91	275	[J] COG0052 Ribosomal protein S2
YP_009234972.1	sll1789	34.76	843	472	21	7	831	1	783	3e-125	426	[K] COG0086 DNA-directed RNA polymerase, beta' subunit/160 kD subunit
YP_009234973.1	alr1595	46.4	666	301	8	9	671	11	623	0	578	[K] COG0086 DNA-directed RNA polymerase, beta' subunit/160 kD subunit
YP_009234974.1	sll1787	47.36	1062	535	10	6	1053	3	1054	0	1004	[K] COG0085 DNA-directed RNA polymerase, beta subunit/140 kD subunit
YP_009234980.1	slr0628	53	100	47	0	1	100	1	100	2e-31	110	[J] COG0199 Ribosomal protein S14
YP_009234983.1	slr0823	61.9	168	64	0	1	168	1	168	5e-71	217	[R] COG0457 FOG: TPR repeat
YP_009234984.1	slr0469	56.65	203	85	2	1	201	1	202	6e-79	239	[J] COG0522 Ribosomal protein S4 and related proteins
YP_009234985.1	all3840	57.05	156	67	0	3	158	20	175	3e-63	197	[C] COG0852 NADH:ubiquinone oxidoreductase 27 kD subunit
YP_009234986.1	all3841	69.59	194	59	0	1	194	16	209	2e-98	292	[C] COG0377 NADH:ubiquinone oxidoreductase 20 kD subunit and related Fe-S oxidoreductases
YP_009234987.1	slr1279	65.83	120	41	0	1	120	1	120	3e-51	162	[C] COG0838 NADH:ubiquinone oxidoreductase subunit 3 (chain A)
YP_009234988.1	slr1330	45.04	131	69	1	1	128	30	160	1e-35	124	[C] COG0355 F0F1-type ATP synthase, epsilon subunit (mitochondrial delta subunit)
YP_009234989.1	all5039	80.62	480	93	0	12	491	2	481	0	787	[C] COG0055 F0F1-type ATP synthase, beta subunit
YP_009234990.1	alr1524	86.02	472	66	0	4	475	5	476	0	852	[G] COG1850 Ribulose 1,5-bisphosphate carboxylase, large subunit
YP_009234991.1	sll0336	56.46	271	111	3	224	489	32	300	3e-104	319	[I] COG0777 Acetyl-CoA carboxylase beta subunit
YP_009235003.1	asl4452	60	65	25	1	1	65	1	64	5e-18	73.6	[J] COG0267 Ribosomal protein L33
YP_009235004.1	asl4451	53.73	67	31	0	15	81	4	70	4e-19	78.2	[J] COG0238 Ribosomal protein S18
YP_009235005.1	BH3138	43.86	114	62	1	1	114	1	112	1e-24	94.4	[J] COG0292 Ribosomal protein L20
YP_009235006.1	all4340	82.11	123	22	0	1	123	1	123	2e-70	212	[J] COG0048 Ribosomal protein S12
YP_009235007.1	all4357	54.31	197	89	1	1	197	1	196	9e-77	234	[OU] COG0740 Protease subunit of ATP-dependent Clp proteases
YP_009235012.1	alr3421	82.79	215	37	0	1	215	1	215	1e-133	379	[C] COG1290 Cytochrome b subunit of the bc complex
YP_009235013.1	alr3422	80.62	160	31	0	1	160	1	160	3e-92	270	[C] COG1290 Cytochrome b subunit of the bc complex
YP_009235014.1	all4191	36.34	333	187	4	13	341	4	315	6e-69	223	[K] COG0202 DNA-directed RNA polymerase, alpha subunit/40 kD subunit
YP_009235015.1	sll1817	56.67	120	52	0	19	138	11	130	1e-45	149	[J] COG0100 Ribosomal protein S11
YP_009235016.1	asl4194	78.38	37	8	0	1	37	1	37	1e-14	63.2	[J] COG0257 Ribosomal protein L36
YP_009235017.1	asl4195	59.46	74	29	1	1	73	1	74	2e-24	91.3	[J] COG0361 Translation initiation factor 1 (IF-1)
YP_009235018.1	sll1809	53.49	129	60	0	4	132	5	133	7e-44	144	[J] COG0096 Ribosomal protein S8
YP_009235019.1	all4205	70.49	122	36	0	1	122	1	122	2e-60	186	[J] COG0093 Ribosomal protein L14
YP_009235020.1	sll1805	75	132	33	0	1	132	1	132	8e-72	216	[J] COG0197 Ribosomal protein L16/L10E
YP_009235021.1	all4209	44.7	217	116	2	1	217	1	213	1e-53	177	[J] COG0092 Ribosomal protein S3
YP_009235022.1	sll1803	49.59	121	61	0	1	121	1	121	1e-39	134	[J] COG0091 Ribosomal protein L22
YP_009235023.1	asl4211	67.39	92	30	0	1	92	1	92	7e-44	141	[J] COG0185 Ribosomal protein S19
YP_009235024.1	sll1802	56.12	278	117	2	1	275	1	276	9e-108	318	[J] COG0090 Ribosomal protein L2
YP_009235025.1	sll1801	38.1	84	51	1	2	84	12	95	7e-13	62	[J] COG0089 Ribosomal protein L23
YP_009235027.1	all4883	49.9	485	240	2	27	509	10	493	1e-157	464	[C] COG1007 NADH:ubiquinone oxidoreductase subunit 2 (chain N)
YP_009235028.1	all4339	56.77	155	67	0	1	155	1	155	4e-61	190	[J] COG0049 Ribosomal protein S7
YP_009235029.1	slr0844	45.18	726	330	10	1	721	1	663	0	574	[CP] COG1009 NADH:ubiquinone oxidoreductase subunit 5 (chain L)/Multisubunit Na+/H+ antiporter, MnhA subunit
YP_009235030.1	asl3674	50.98	51	23	1	1	51	1	49	9e-07	43.5	[J] COG0333 Ribosomal protein L32
YP_009235031.1	sll1513	40.6	335	180	4	1	318	1	333	7e-81	253	[O] COG0755 ABC-type transport system involved in cytochrome c biogenesis, permease component
YP_009235032.1	alr3957	55.9	483	211	2	4	485	6	487	0	547	[C] COG1008 NADH:ubiquinone oxidoreductase subunit 4 (chain M)
YP_009235033.1	asr3463	88.89	81	9	0	1	81	1	81	7e-50	156	[C] COG1145 Ferredoxin
YP_009235034.1	alr0226	58	100	42	0	1	100	1	100	3e-22	87	[C] COG0713 NADH:ubiquinone oxidoreductase subunit 11 or 4L (chain K)
YP_009235035.1	sll0521	42.17	166	85	3	11	176	14	168	1e-29	111	[C] COG0839 NADH:ubiquinone oxidoreductase subunit 6 (chain J)
YP_009235036.1	alr0224	63.47	167	61	0	1	167	1	167	1e-78	238	[C] COG1143 Formate hydrogenlyase subunit 6/NADH:ubiquinone oxidoreductase 23 kD subunit (chain I)
YP_009235037.1	sll0519	58.36	365	140	3	5	359	2	364	2e-148	429	[C] COG1005 NADH:ubiquinone oxidoreductase subunit 1 (chain H)
YP_009235038.1	alr3355	71.21	389	111	1	6	393	6	394	0	615	[C] COG0649 NADH:ubiquinone oxidoreductase 49 kD subunit 7
YP_009235041.1	all4339	56.77	155	67	0	1	155	1	155	4e-61	190	[J] COG0049 Ribosomal protein S7
YP_009235042.1	all4883	49.9	485	240	2	27	509	10	493	1e-157	464	[C] COG1007 NADH:ubiquinone oxidoreductase subunit 2 (chain N)
YP_009235044.1	sll1801	38.1	84	51	1	2	84	12	95	7e-13	62	[J] COG0089 Ribosomal protein L23
YP_009235045.1	sll1802	56.12	278	117	2	1	275	1	276	9e-108	318	[J] COG0090 Ribosomal protein L2
YP_009243010.1	sll1096	82.93	123	21	0	1	123	1	123	2e-70	211	[J] COG0048 Ribosomal protein S12
YP_009243015.1	sll1326	71.46	501	143	0	1	501	1	501	0	748	[C] COG0056 F0F1-type ATP synthase, alpha subunit
YP_009243016.1	sll1324	26.47	170	125	0	8	177	8	177	4e-17	77.8	[C] COG0711 F0F1-type ATP synthase, subunit b
YP_009243017.1	asl0009	94.92	59	3	0	22	80	22	80	4e-32	110	[C] COG0636 F0F1-type ATP synthase, subunit c/Archaeal/vacuolar-type H+-ATPase, subunit K
YP_009243018.1	all0010	71.05	228	65	1	17	243	12	239	2e-102	303	[C] COG0356 F0F1-type ATP synthase, subunit a
YP_009243019.1	all4792	51.77	226	109	0	8	233	4	229	3e-89	269	[J] COG0052 Ribosomal protein S2
YP_009243020.1	sll1789	34.21	909	510	25	7	895	1	841	3e-125	426	[K] COG0086 DNA-directed RNA polymerase, beta' subunit/160 kD subunit
YP_009243021.1	alr1595	46.33	667	296	10	10	669	12	623	0	569	[K] COG0086 DNA-directed RNA polymerase, beta' subunit/160 kD subunit
YP_009243022.1	sll1787	47.18	1062	537	10	6	1053	3	1054	0	991	[K] COG0085 DNA-directed RNA polymerase, beta subunit/140 kD subunit
YP_009243028.1	slr0628	54	100	46	0	1	100	1	100	2e-31	110	[J] COG0199 Ribosomal protein S14
YP_009243031.1	slr0823	61.05	172	63	1	1	172	1	168	1e-69	214	[R] COG0457 FOG: TPR repeat
YP_009243032.1	slr0469	57.56	205	80	3	1	201	1	202	1e-77	236	[J] COG0522 Ribosomal protein S4 and related proteins
YP_009243033.1	all3840	55.77	156	69	0	3	158	20	175	3e-62	194	[C] COG0852 NADH:ubiquinone oxidoreductase 27 kD subunit
YP_009243034.1	all3841	69.07	194	60	0	1	194	16	209	5e-97	288	[C] COG0377 NADH:ubiquinone oxidoreductase 20 kD subunit and related Fe-S oxidoreductases
YP_009243035.1	slr1279	65.83	120	41	0	1	120	1	120	4e-52	164	[C] COG0838 NADH:ubiquinone oxidoreductase subunit 3 (chain A)
YP_009243036.1	slr1330	42.75	131	72	1	1	128	30	160	5e-34	120	[C] COG0355 F0F1-type ATP synthase, epsilon subunit (mitochondrial delta subunit)
YP_009243037.1	all5039	81.51	476	88	0	12	487	2	477	0	796	[C] COG0055 F0F1-type ATP synthase, beta subunit
YP_009243038.1	alr1524	84.75	472	72	0	4	475	5	476	0	840	[G] COG1850 Ribulose 1,5-bisphosphate carboxylase, large subunit
YP_009243039.1	sll0336	57.2	271	109	3	224	489	32	300	1e-102	315	[I] COG0777 Acetyl-CoA carboxylase beta subunit
YP_009243051.1	asl4452	56.92	65	27	1	1	65	1	64	2e-18	75.1	[J] COG0267 Ribosomal protein L33
YP_009243052.1	asl4451	55.22	67	30	0	15	81	4	70	5e-20	80.5	[J] COG0238 Ribosomal protein S18
YP_009243053.1	alr3428	54.95	111	48	1	1	111	1	109	1e-22	90.9	[J] COG0292 Ribosomal protein L20
YP_009243054.1	sll1096	82.93	123	21	0	1	123	1	123	2e-70	211	[J] COG0048 Ribosomal protein S12
YP_009243055.1	all4357	53.57	196	89	2	1	195	1	195	3e-72	222	[OU] COG0740 Protease subunit of ATP-dependent Clp proteases
YP_009243060.1	alr3421	83.26	215	36	0	1	215	1	215	2e-135	384	[C] COG1290 Cytochrome b subunit of the bc complex
YP_009243061.1	alr3422	80.62	160	31	0	1	160	1	160	2e-92	271	[C] COG1290 Cytochrome b subunit of the bc complex
YP_009243062.1	all4191	34.95	329	187	5	13	336	4	310	7e-66	214	[K] COG0202 DNA-directed RNA polymerase, alpha subunit/40 kD subunit
YP_009243063.1	sll1817	56.45	124	54	0	15	138	7	130	1e-46	152	[J] COG0100 Ribosomal protein S11
YP_009243064.1	asl4194	78.38	37	8	0	1	37	1	37	1e-14	63.2	[J] COG0257 Ribosomal protein L36
YP_009243065.1	asl4195	60.81	74	28	1	1	73	1	74	5e-25	92.4	[J] COG0361 Translation initiation factor 1 (IF-1)
YP_009243066.1	all4202	48.84	129	66	0	4	132	5	133	3e-41	138	[J] COG0096 Ribosomal protein S8
YP_009243067.1	all4205	68.85	122	38	0	1	122	1	122	5e-60	185	[J] COG0093 Ribosomal protein L14
YP_009243068.1	sll1805	74.24	132	34	0	1	132	1	132	2e-70	213	[J] COG0197 Ribosomal protein L16/L10E
YP_009243069.1	sll1804	43.78	217	113	3	1	217	1	208	6e-52	172	[J] COG0092 Ribosomal protein S3
YP_009243070.1	sll1803	49.17	120	61	0	1	120	1	120	4e-38	131	[J] COG0091 Ribosomal protein L22
YP_009243071.1	asl4211	66.3	92	31	0	1	92	1	92	1e-42	139	[J] COG0185 Ribosomal protein S19
YP_009243072.1	sll1802	56.12	278	117	3	1	275	1	276	4e-104	309	[J] COG0090 Ribosomal protein L2
YP_009243073.1	sll1801	36.9	84	53	0	2	85	12	95	3e-14	65.5	[J] COG0089 Ribosomal protein L23
YP_009243076.1	all4883	50.21	480	236	2	32	509	15	493	2e-158	466	[C] COG1007 NADH:ubiquinone oxidoreductase subunit 2 (chain N)
YP_009243077.1	all4339	56.13	155	68	0	1	155	1	155	8e-61	189	[J] COG0049 Ribosomal protein S7
YP_009243078.1	slr0844	44.54	723	341	10	1	723	1	663	0	560	[CP] COG1009 NADH:ubiquinone oxidoreductase subunit 5 (chain L)/Multisubunit Na+/H+ antiporter, MnhA subunit
YP_009243079.1	sll1513	46.64	298	143	5	37	318	36	333	2e-79	249	[O] COG0755 ABC-type transport system involved in cytochrome c biogenesis, permease component
YP_009243080.1	alr3957	56.34	481	208	2	3	482	5	484	0	556	[C] COG1008 NADH:ubiquinone oxidoreductase subunit 4 (chain M)
YP_009243081.1	asr3463	88.89	81	9	0	1	81	1	81	7e-50	156	[C] COG1145 Ferredoxin
YP_009243082.1	sll0522	59	100	41	0	1	100	3	102	8e-22	85.9	[C] COG0713 NADH:ubiquinone oxidoreductase subunit 11 or 4L (chain K)
YP_009243083.1	sll0521	42.17	166	85	3	11	176	14	168	3e-29	110	[C] COG0839 NADH:ubiquinone oxidoreductase subunit 6 (chain J)
YP_009243084.1	alr0224	63.01	173	64	0	1	173	1	173	6e-81	243	[C] COG1143 Formate hydrogenlyase subunit 6/NADH:ubiquinone oxidoreductase 23 kD subunit (chain I)
YP_009243085.1	sll0519	57.62	361	147	2	3	360	7	364	3e-149	432	[C] COG1005 NADH:ubiquinone oxidoreductase subunit 1 (chain H)
YP_009243086.1	alr3355	71.21	389	111	1	6	393	6	394	0	611	[C] COG0649 NADH:ubiquinone oxidoreductase 49 kD subunit 7
YP_009243087.1	FN1979	48.57	70	36	0	16	85	15	84	1e-15	68.9	[J] COG0184 Ribosomal protein S15P/S13E
YP_009243089.1	all4339	56.13	155	68	0	1	155	1	155	8e-61	189	[J] COG0049 Ribosomal protein S7
YP_009243090.1	all4883	50.21	480	236	2	32	509	15	493	2e-158	466	[C] COG1007 NADH:ubiquinone oxidoreductase subunit 2 (chain N)
YP_009243093.1	sll1801	36.9	84	53	0	2	85	12	95	3e-14	65.5	[J] COG0089 Ribosomal protein L23
YP_009243094.1	sll1802	56.12	278	117	3	1	275	1	276	4e-104	309	[J] COG0090 Ribosomal protein L2
YP_009246616.1	sll1096	82.11	123	22	0	1	123	1	123	1e-69	209	[J] COG0048 Ribosomal protein S12
YP_009246619.1	ssr0482	48.78	82	42	0	1	82	1	82	2e-22	86.7	[J] COG0228 Ribosomal protein S16
YP_009246622.1	all0005	72.8	500	134	2	3	501	4	502	0	744	[C] COG0056 F0F1-type ATP synthase, alpha subunit
YP_009246623.1	sll1324	24.86	177	133	0	1	177	1	177	2e-15	72.8	[C] COG0711 F0F1-type ATP synthase, subunit b
YP_009246624.1	asl0009	94.92	59	3	0	22	80	22	80	4e-32	110	[C] COG0636 F0F1-type ATP synthase, subunit c/Archaeal/vacuolar-type H+-ATPase, subunit K
YP_009246625.1	sll1322	69.36	235	70	2	14	246	38	272	1e-101	302	[C] COG0356 F0F1-type ATP synthase, subunit a
YP_009246626.1	all4792	50.45	222	110	0	8	229	4	225	3e-84	256	[J] COG0052 Ribosomal protein S2
YP_009246627.1	sll1789	32.43	959	553	25	7	941	1	888	3e-128	434	[K] COG0086 DNA-directed RNA polymerase, beta' subunit/160 kD subunit
YP_009246628.1	alr1595	45.85	663	305	7	10	669	12	623	0	562	[K] COG0086 DNA-directed RNA polymerase, beta' subunit/160 kD subunit
YP_009246629.1	alr1594	46.88	1075	522	12	12	1054	27	1084	0	979	[K] COG0085 DNA-directed RNA polymerase, beta subunit/140 kD subunit
YP_009246635.1	slr0628	53	100	47	0	1	100	1	100	2e-29	105	[J] COG0199 Ribosomal protein S14
YP_009246638.1	slr0823	63.25	166	61	0	1	166	1	166	1e-73	223	[R] COG0457 FOG: TPR repeat
YP_009246639.1	slr0469	57.14	210	77	3	1	206	1	201	2e-77	236	[J] COG0522 Ribosomal protein S4 and related proteins
YP_009246640.1	all3840	55.13	156	70	0	3	158	20	175	2e-62	194	[C] COG0852 NADH:ubiquinone oxidoreductase 27 kD subunit
YP_009246641.1	all3841	68.04	194	62	0	1	194	16	209	5e-95	283	[C] COG0377 NADH:ubiquinone oxidoreductase 20 kD subunit and related Fe-S oxidoreductases
YP_009246642.1	slr1279	64.17	120	43	0	1	120	1	120	4e-50	159	[C] COG0838 NADH:ubiquinone oxidoreductase subunit 3 (chain A)
YP_009246643.1	slr1330	42.75	131	72	1	1	128	30	160	5e-33	117	[C] COG0355 F0F1-type ATP synthase, epsilon subunit (mitochondrial delta subunit)
YP_009246644.1	all5039	81.3	476	89	0	12	487	2	477	0	791	[C] COG0055 F0F1-type ATP synthase, beta subunit
YP_009246645.1	alr1524	85.81	472	67	0	4	475	5	476	0	848	[G] COG1850 Ribulose 1,5-bisphosphate carboxylase, large subunit
YP_009246646.1	sll0336	46.58	322	122	3	193	509	32	308	1e-89	282	[I] COG0777 Acetyl-CoA carboxylase beta subunit
YP_009246658.1	asl4452	56.92	65	27	1	1	65	1	64	7e-18	73.6	[J] COG0267 Ribosomal protein L33
YP_009246659.1	asl4451	50.77	65	32	0	14	78	4	68	1e-16	72	[J] COG0238 Ribosomal protein S18
YP_009246660.1	BH3138	41.23	114	65	1	1	114	1	112	5e-19	79.7	[J] COG0292 Ribosomal protein L20
YP_009246661.1	sll1096	82.11	123	22	0	1	123	1	123	1e-69	209	[J] COG0048 Ribosomal protein S12
YP_009246662.1	all4357	40.51	195	107	2	1	191	1	190	7e-47	157	[OU] COG0740 Protease subunit of ATP-dependent Clp proteases
YP_009246667.1	alr3421	83.26	215	36	0	1	215	1	215	2e-136	387	[C] COG1290 Cytochrome b subunit of the bc complex
YP_009246668.1	alr3422	80.62	160	31	0	1	160	1	160	3e-92	270	[C] COG1290 Cytochrome b subunit of the bc complex
YP_009246669.1	all4191	36.28	317	177	4	13	323	4	301	6e-65	212	[K] COG0202 DNA-directed RNA polymerase, alpha subunit/40 kD subunit
YP_009246670.1	aq_073	54.31	116	53	0	25	140	10	125	6e-45	147	[J] COG0100 Ribosomal protein S11
YP_009246671.1	sml0006	78.95	38	7	1	1	37	1	38	2e-14	62.4	[J] COG0257 Ribosomal protein L36
YP_009246672.1	all4202	49.62	131	66	0	2	132	3	133	2e-43	143	[J] COG0096 Ribosomal protein S8
YP_009246673.1	all4205	65.57	122	42	0	1	122	1	122	6e-57	177	[J] COG0093 Ribosomal protein L14
YP_009246674.1	sll1805	72.73	132	36	0	1	132	1	132	3e-69	210	[J] COG0197 Ribosomal protein L16/L10E
YP_009246675.1	all4209	41.36	220	122	2	1	220	1	213	2e-51	171	[J] COG0092 Ribosomal protein S3
YP_009246676.1	all4210	51.4	107	52	0	8	114	6	112	2e-35	124	[J] COG0091 Ribosomal protein L22
YP_009246677.1	asl4211	69.57	92	28	0	1	92	1	92	8e-46	146	[J] COG0185 Ribosomal protein S19
YP_009246678.1	sll1802	57.09	275	114	2	3	274	3	276	1e-107	318	[J] COG0090 Ribosomal protein L2
YP_009246679.1	BMEI0759	44.05	84	47	0	2	85	8	91	6e-14	65.1	[J] COG0089 Ribosomal protein L23
YP_009246681.1	all4883	50.42	480	235	2	32	509	15	493	2e-159	469	[C] COG1007 NADH:ubiquinone oxidoreductase subunit 2 (chain N)
YP_009246682.1	all4339	43.59	117	54	1	1	105	1	117	7e-27	100	[J] COG0049 Ribosomal protein S7
YP_009246683.1	slr0844	46.54	722	326	9	1	721	1	663	0	575	[CP] COG1009 NADH:ubiquinone oxidoreductase subunit 5 (chain L)/Multisubunit Na+/H+ antiporter, MnhA subunit
YP_009246685.1	all0936	40.57	350	174	4	1	316	1	350	4e-80	252	[O] COG0755 ABC-type transport system involved in cytochrome c biogenesis, permease component
YP_009246686.1	alr3957	57.76	483	202	2	1	482	3	484	0	560	[C] COG1008 NADH:ubiquinone oxidoreductase subunit 4 (chain M)
YP_009246687.1	asr3463	88.89	81	9	0	1	81	1	81	7e-50	156	[C] COG1145 Ferredoxin
YP_009246688.1	sll0522	58	100	42	0	1	100	3	102	1e-22	88.2	[C] COG0713 NADH:ubiquinone oxidoreductase subunit 11 or 4L (chain K)
YP_009246689.1	sll0521	43.11	167	82	5	11	176	14	168	3e-29	110	[C] COG0839 NADH:ubiquinone oxidoreductase subunit 6 (chain J)
YP_009246690.1	alr0224	61.31	168	65	0	1	168	1	168	1e-77	234	[C] COG1143 Formate hydrogenlyase subunit 6/NADH:ubiquinone oxidoreductase 23 kD subunit (chain I)
YP_009246691.1	sll0519	62.46	325	119	1	40	361	40	364	4e-148	429	[C] COG1005 NADH:ubiquinone oxidoreductase subunit 1 (chain H)
YP_009246692.1	alr3355	70.95	389	112	1	6	393	6	394	0	605	[C] COG0649 NADH:ubiquinone oxidoreductase 49 kD subunit 7
YP_009246693.1	FN1979	48.57	70	36	0	15	84	15	84	3e-15	68.2	[J] COG0184 Ribosomal protein S15P/S13E
YP_009246695.1	all4339	43.59	117	54	1	1	105	1	117	7e-27	100	[J] COG0049 Ribosomal protein S7
YP_009246696.1	all4883	50.42	480	235	2	32	509	15	493	2e-159	469	[C] COG1007 NADH:ubiquinone oxidoreductase subunit 2 (chain N)
YP_009246698.1	BMEI0759	44.05	84	47	0	2	85	8	91	6e-14	65.1	[J] COG0089 Ribosomal protein L23
YP_009246699.1	sll1802	57.09	275	114	2	3	274	3	276	1e-107	318	[J] COG0090 Ribosomal protein L2
YP_009246700.1	asl4211	69.57	92	28	0	1	92	1	92	8e-46	146	[J] COG0185 Ribosomal protein S19
YP_009246701.1	sll1096	82.11	123	22	0	1	123	1	123	1e-69	209	[J] COG0048 Ribosomal protein S12
YP_009246704.1	ssr0482	48.78	82	42	0	1	82	1	82	2e-22	86.7	[J] COG0228 Ribosomal protein S16
YP_009246707.1	all0005	72.8	500	134	2	3	501	4	502	0	745	[C] COG0056 F0F1-type ATP synthase, alpha subunit
YP_009246708.1	sll1324	24.86	177	133	0	1	177	1	177	2e-15	72.8	[C] COG0711 F0F1-type ATP synthase, subunit b
YP_009246709.1	asl0009	94.92	59	3	0	22	80	22	80	4e-32	110	[C] COG0636 F0F1-type ATP synthase, subunit c/Archaeal/vacuolar-type H+-ATPase, subunit K
YP_009246710.1	sll1322	69.36	235	70	2	14	246	38	272	1e-101	302	[C] COG0356 F0F1-type ATP synthase, subunit a
YP_009246711.1	all4792	50.45	222	110	0	8	229	4	225	3e-84	256	[J] COG0052 Ribosomal protein S2
YP_009246712.1	sll1789	32.43	959	553	25	7	941	1	888	2e-128	434	[K] COG0086 DNA-directed RNA polymerase, beta' subunit/160 kD subunit
YP_009246713.1	alr1595	45.85	663	305	7	10	669	12	623	0	562	[K] COG0086 DNA-directed RNA polymerase, beta' subunit/160 kD subunit
YP_009246714.1	sll1787	46.35	1068	540	11	5	1054	2	1054	0	977	[K] COG0085 DNA-directed RNA polymerase, beta subunit/140 kD subunit
YP_009246720.1	slr0628	53	100	47	0	1	100	1	100	2e-29	105	[J] COG0199 Ribosomal protein S14
YP_009246723.1	slr0823	63.25	166	61	0	1	166	1	166	1e-73	223	[R] COG0457 FOG: TPR repeat
YP_009246724.1	slr0469	57.14	210	77	3	1	206	1	201	2e-77	236	[J] COG0522 Ribosomal protein S4 and related proteins
YP_009246725.1	all3840	55.13	156	70	0	3	158	20	175	2e-62	194	[C] COG0852 NADH:ubiquinone oxidoreductase 27 kD subunit
YP_009246726.1	all3841	68.04	194	62	0	1	194	16	209	5e-95	283	[C] COG0377 NADH:ubiquinone oxidoreductase 20 kD subunit and related Fe-S oxidoreductases
YP_009246727.1	slr1279	64.17	120	43	0	1	120	1	120	4e-50	159	[C] COG0838 NADH:ubiquinone oxidoreductase subunit 3 (chain A)
YP_009246728.1	slr1330	42.75	131	72	1	1	128	30	160	5e-33	117	[C] COG0355 F0F1-type ATP synthase, epsilon subunit (mitochondrial delta subunit)
YP_009246729.1	all5039	81.3	476	89	0	12	487	2	477	0	791	[C] COG0055 F0F1-type ATP synthase, beta subunit
YP_009246730.1	alr1524	85.81	472	67	0	4	475	5	476	0	848	[G] COG1850 Ribulose 1,5-bisphosphate carboxylase, large subunit
YP_009246731.1	sll0336	46.58	322	122	3	193	509	32	308	8e-90	283	[I] COG0777 Acetyl-CoA carboxylase beta subunit
YP_009246743.1	asl4452	56.92	65	27	1	1	65	1	64	7e-18	73.6	[J] COG0267 Ribosomal protein L33
YP_009246744.1	asl4451	50.77	65	32	0	14	78	4	68	1e-16	72	[J] COG0238 Ribosomal protein S18
YP_009246745.1	BH3138	41.23	114	65	1	1	114	1	112	5e-19	79.7	[J] COG0292 Ribosomal protein L20
YP_009246746.1	sll1096	82.11	123	22	0	1	123	1	123	1e-69	209	[J] COG0048 Ribosomal protein S12
YP_009246747.1	all4357	40.51	195	107	2	1	191	1	190	1e-46	157	[OU] COG0740 Protease subunit of ATP-dependent Clp proteases
YP_009246752.1	alr3421	83.26	215	36	0	1	215	1	215	2e-136	387	[C] COG1290 Cytochrome b subunit of the bc complex
YP_009246753.1	alr3422	80.62	160	31	0	1	160	1	160	3e-92	270	[C] COG1290 Cytochrome b subunit of the bc complex
YP_009246754.1	all4191	36.28	317	177	4	13	323	4	301	7e-65	212	[K] COG0202 DNA-directed RNA polymerase, alpha subunit/40 kD subunit
YP_009246755.1	aq_073	54.31	116	53	0	25	140	10	125	5e-45	147	[J] COG0100 Ribosomal protein S11
YP_009246756.1	sml0006	78.95	38	7	1	1	37	1	38	2e-14	62.4	[J] COG0257 Ribosomal protein L36
YP_009246757.1	all4202	49.62	131	66	0	2	132	3	133	2e-43	143	[J] COG0096 Ribosomal protein S8
YP_009246758.1	all4205	66.39	122	41	0	1	122	1	122	1e-57	179	[J] COG0093 Ribosomal protein L14
YP_009246759.1	sll1805	72.73	132	36	0	1	132	1	132	3e-69	210	[J] COG0197 Ribosomal protein L16/L10E
YP_009246760.1	all4209	40.91	220	123	2	1	220	1	213	4e-50	168	[J] COG0092 Ribosomal protein S3
YP_009246761.1	all4210	51.4	107	52	0	8	114	6	112	2e-35	124	[J] COG0091 Ribosomal protein L22
YP_009246762.1	asl4211	69.57	92	28	0	1	92	1	92	8e-46	146	[J] COG0185 Ribosomal protein S19
YP_009246763.1	sll1802	57.45	275	113	2	3	274	3	276	3e-108	320	[J] COG0090 Ribosomal protein L2
YP_009246764.1	BMEI0759	44.05	84	47	0	2	85	8	91	6e-14	65.1	[J] COG0089 Ribosomal protein L23
YP_009246766.1	all4883	50.42	480	235	2	32	509	15	493	2e-159	469	[C] COG1007 NADH:ubiquinone oxidoreductase subunit 2 (chain N)
YP_009246767.1	all4339	43.59	117	54	1	1	105	1	117	7e-27	100	[J] COG0049 Ribosomal protein S7
YP_009246768.1	slr0844	46.54	722	326	9	1	721	1	663	0	574	[CP] COG1009 NADH:ubiquinone oxidoreductase subunit 5 (chain L)/Multisubunit Na+/H+ antiporter, MnhA subunit
YP_009246770.1	all0936	41.14	350	172	4	1	316	1	350	2e-80	253	[O] COG0755 ABC-type transport system involved in cytochrome c biogenesis, permease component
YP_009246771.1	alr3957	57.76	483	202	2	1	482	3	484	0	561	[C] COG1008 NADH:ubiquinone oxidoreductase subunit 4 (chain M)
YP_009246772.1	asr3463	88.89	81	9	0	1	81	1	81	7e-50	156	[C] COG1145 Ferredoxin
YP_009246773.1	sll0522	57	100	43	0	1	100	3	102	2e-22	87.4	[C] COG0713 NADH:ubiquinone oxidoreductase subunit 11 or 4L (chain K)
YP_009246774.1	sll0521	43.11	167	82	5	11	176	14	168	3e-29	110	[C] COG0839 NADH:ubiquinone oxidoreductase subunit 6 (chain J)
YP_009246775.1	alr0224	61.31	168	65	0	1	168	1	168	1e-77	234	[C] COG1143 Formate hydrogenlyase subunit 6/NADH:ubiquinone oxidoreductase 23 kD subunit (chain I)
YP_009246776.1	sll0519	62.77	325	118	1	40	361	40	364	1e-148	430	[C] COG1005 NADH:ubiquinone oxidoreductase subunit 1 (chain H)
YP_009246777.1	alr3355	70.95	389	112	1	6	393	6	394	0	605	[C] COG0649 NADH:ubiquinone oxidoreductase 49 kD subunit 7
YP_009246778.1	FN1979	48.57	70	36	0	15	84	15	84	3e-15	68.2	[J] COG0184 Ribosomal protein S15P/S13E
YP_009246780.1	all4339	43.59	117	54	1	1	105	1	117	7e-27	100	[J] COG0049 Ribosomal protein S7
YP_009246781.1	all4883	50.42	480	235	2	32	509	15	493	2e-159	469	[C] COG1007 NADH:ubiquinone oxidoreductase subunit 2 (chain N)
YP_009246783.1	BMEI0759	44.05	84	47	0	2	85	8	91	6e-14	65.1	[J] COG0089 Ribosomal protein L23
YP_009246784.1	sll1096	82.11	123	22	0	1	123	1	123	1e-69	209	[J] COG0048 Ribosomal protein S12
YP_009246787.1	ssr0482	48.78	82	42	0	1	82	1	82	4e-22	87.8	[J] COG0228 Ribosomal protein S16
YP_009246790.1	all0005	72.8	500	134	2	3	501	4	502	0	745	[C] COG0056 F0F1-type ATP synthase, alpha subunit
YP_009246791.1	sll1324	24.86	177	133	0	1	177	1	177	1e-15	73.6	[C] COG0711 F0F1-type ATP synthase, subunit b
YP_009246792.1	asl0009	94.92	59	3	0	22	80	22	80	4e-32	110	[C] COG0636 F0F1-type ATP synthase, subunit c/Archaeal/vacuolar-type H+-ATPase, subunit K
YP_009246793.1	sll1322	69.36	235	70	2	14	246	38	272	1e-101	302	[C] COG0356 F0F1-type ATP synthase, subunit a
YP_009246794.1	all4792	50.45	222	110	0	8	229	4	225	3e-84	256	[J] COG0052 Ribosomal protein S2
YP_009246795.1	sll1789	32.43	959	553	25	7	941	1	888	5e-128	433	[K] COG0086 DNA-directed RNA polymerase, beta' subunit/160 kD subunit
YP_009246796.1	alr1595	45.85	663	305	7	10	669	12	623	0	563	[K] COG0086 DNA-directed RNA polymerase, beta' subunit/160 kD subunit
YP_009246797.1	alr1594	46.88	1075	522	12	12	1054	27	1084	0	979	[K] COG0085 DNA-directed RNA polymerase, beta subunit/140 kD subunit
YP_009246803.1	slr0628	53	100	47	0	1	100	1	100	2e-29	105	[J] COG0199 Ribosomal protein S14
YP_009246806.1	slr0823	63.25	166	61	0	1	166	1	166	1e-73	223	[R] COG0457 FOG: TPR repeat
YP_009246807.1	slr0469	57.14	210	77	3	1	206	1	201	2e-77	236	[J] COG0522 Ribosomal protein S4 and related proteins
YP_009246808.1	all3840	55.13	156	70	0	3	158	20	175	3e-62	194	[C] COG0852 NADH:ubiquinone oxidoreductase 27 kD subunit
YP_009246809.1	all3841	68.04	194	62	0	1	194	16	209	6e-95	283	[C] COG0377 NADH:ubiquinone oxidoreductase 20 kD subunit and related Fe-S oxidoreductases
YP_009246810.1	slr1279	64.17	120	43	0	1	120	1	120	4e-50	159	[C] COG0838 NADH:ubiquinone oxidoreductase subunit 3 (chain A)
YP_009246811.1	slr1330	42.75	131	72	1	1	128	30	160	5e-33	117	[C] COG0355 F0F1-type ATP synthase, epsilon subunit (mitochondrial delta subunit)
YP_009246812.1	all5039	81.3	476	89	0	12	487	2	477	0	791	[C] COG0055 F0F1-type ATP synthase, beta subunit
YP_009246813.1	alr1524	85.59	472	68	0	4	475	5	476	0	847	[G] COG1850 Ribulose 1,5-bisphosphate carboxylase, large subunit
YP_009246814.1	sll0336	46.75	323	121	4	190	507	32	308	2e-89	282	[I] COG0777 Acetyl-CoA carboxylase beta subunit
YP_009246826.1	asl4452	56.92	65	27	1	1	65	1	64	7e-18	73.6	[J] COG0267 Ribosomal protein L33
YP_009246827.1	asl4451	50.77	65	32	0	14	78	4	68	1e-16	72	[J] COG0238 Ribosomal protein S18
YP_009246828.1	BH3138	41.23	114	65	1	1	114	1	112	7e-19	79.3	[J] COG0292 Ribosomal protein L20
YP_009246829.1	sll1096	82.11	123	22	0	1	123	1	123	1e-69	209	[J] COG0048 Ribosomal protein S12
YP_009246830.1	all4357	40.51	195	107	2	1	191	1	190	5e-47	157	[OU] COG0740 Protease subunit of ATP-dependent Clp proteases
YP_009246835.1	alr3421	83.26	215	36	0	1	215	1	215	2e-136	387	[C] COG1290 Cytochrome b subunit of the bc complex
YP_009246836.1	alr3422	80.62	160	31	0	1	160	1	160	3e-92	270	[C] COG1290 Cytochrome b subunit of the bc complex
YP_009246837.1	all4191	36.28	317	177	4	13	323	4	301	6e-65	212	[K] COG0202 DNA-directed RNA polymerase, alpha subunit/40 kD subunit
YP_009246838.1	aq_073	54.31	116	53	0	25	140	10	125	6e-45	147	[J] COG0100 Ribosomal protein S11
YP_009246839.1	sml0006	78.95	38	7	1	1	37	1	38	2e-14	62.4	[J] COG0257 Ribosomal protein L36
YP_009246840.1	all4202	49.62	131	66	0	2	132	3	133	2e-43	143	[J] COG0096 Ribosomal protein S8
YP_009246841.1	all4205	67.21	122	40	0	1	122	1	122	6e-58	179	[J] COG0093 Ribosomal protein L14
YP_009246842.1	sll1805	72.73	132	36	0	1	132	1	132	3e-69	210	[J] COG0197 Ribosomal protein L16/L10E
YP_009246843.1	all4209	41.36	220	122	2	1	220	1	213	2e-51	171	[J] COG0092 Ribosomal protein S3
YP_009246844.1	all4210	51.4	107	52	0	8	114	6	112	2e-35	124	[J] COG0091 Ribosomal protein L22
YP_009246845.1	asl4211	69.57	92	28	0	1	92	1	92	8e-46	146	[J] COG0185 Ribosomal protein S19
YP_009246846.1	sll1802	57.09	275	114	2	3	274	3	276	1e-107	318	[J] COG0090 Ribosomal protein L2
YP_009246847.1	BMEI0759	44.05	84	47	0	2	85	8	91	7e-14	65.1	[J] COG0089 Ribosomal protein L23
YP_009246849.1	all4883	50.42	480	235	2	32	509	15	493	2e-159	469	[C] COG1007 NADH:ubiquinone oxidoreductase subunit 2 (chain N)
YP_009246850.1	all4339	43.59	117	54	1	1	105	1	117	7e-27	100	[J] COG0049 Ribosomal protein S7
YP_009246851.1	slr0844	46.48	725	322	10	1	721	1	663	0	580	[CP] COG1009 NADH:ubiquinone oxidoreductase subunit 5 (chain L)/Multisubunit Na+/H+ antiporter, MnhA subunit
YP_009246853.1	all0936	41.14	350	172	4	1	316	1	350	1e-79	251	[O] COG0755 ABC-type transport system involved in cytochrome c biogenesis, permease component
YP_009246854.1	alr3957	57.76	483	202	2	1	482	3	484	0	560	[C] COG1008 NADH:ubiquinone oxidoreductase subunit 4 (chain M)
YP_009246855.1	asr3463	88.89	81	9	0	1	81	1	81	7e-50	156	[C] COG1145 Ferredoxin
YP_009246856.1	sll0522	57	100	43	0	1	100	3	102	1e-22	88.2	[C] COG0713 NADH:ubiquinone oxidoreductase subunit 11 or 4L (chain K)
YP_009246857.1	sll0521	43.11	167	82	5	11	176	14	168	3e-29	110	[C] COG0839 NADH:ubiquinone oxidoreductase subunit 6 (chain J)
YP_009246858.1	alr0224	61.31	168	65	0	1	168	1	168	1e-77	234	[C] COG1143 Formate hydrogenlyase subunit 6/NADH:ubiquinone oxidoreductase 23 kD subunit (chain I)
YP_009246859.1	sll0519	62.46	325	119	1	40	361	40	364	2e-147	427	[C] COG1005 NADH:ubiquinone oxidoreductase subunit 1 (chain H)
YP_009246860.1	alr3355	70.95	389	112	1	6	393	6	394	0	605	[C] COG0649 NADH:ubiquinone oxidoreductase 49 kD subunit 7
YP_009246861.1	FN1979	48.57	70	36	0	15	84	15	84	3e-15	68.2	[J] COG0184 Ribosomal protein S15P/S13E
YP_009246863.1	all4339	43.59	117	54	1	1	105	1	117	7e-27	100	[J] COG0049 Ribosomal protein S7
YP_009246864.1	all4883	50.42	480	235	2	32	509	15	493	2e-159	469	[C] COG1007 NADH:ubiquinone oxidoreductase subunit 2 (chain N)
YP_009246866.1	sll1096	82.11	123	22	0	1	123	1	123	1e-69	209	[J] COG0048 Ribosomal protein S12
YP_009246869.1	ssr0482	48.78	82	42	0	1	82	1	82	2e-22	86.7	[J] COG0228 Ribosomal protein S16
YP_009246872.1	all0005	72.8	500	134	2	3	501	4	502	0	745	[C] COG0056 F0F1-type ATP synthase, alpha subunit
YP_009246873.1	sll1324	24.86	177	133	0	1	177	1	177	2e-15	72.8	[C] COG0711 F0F1-type ATP synthase, subunit b
YP_009246874.1	asl0009	94.92	59	3	0	22	80	22	80	4e-32	110	[C] COG0636 F0F1-type ATP synthase, subunit c/Archaeal/vacuolar-type H+-ATPase, subunit K
YP_009246875.1	sll1322	69.36	235	70	2	14	246	38	272	1e-101	302	[C] COG0356 F0F1-type ATP synthase, subunit a
YP_009246876.1	all4792	50.45	222	110	0	8	229	4	225	3e-84	256	[J] COG0052 Ribosomal protein S2
YP_009246877.1	sll1789	32.43	959	553	25	7	941	1	888	8e-128	433	[K] COG0086 DNA-directed RNA polymerase, beta' subunit/160 kD subunit
YP_009246878.1	alr1595	45.85	663	305	7	10	669	12	623	0	562	[K] COG0086 DNA-directed RNA polymerase, beta' subunit/160 kD subunit
YP_009246879.1	alr1594	46.88	1075	522	12	12	1054	27	1084	0	979	[K] COG0085 DNA-directed RNA polymerase, beta subunit/140 kD subunit
YP_009246885.1	slr0628	53	100	47	0	1	100	1	100	2e-29	105	[J] COG0199 Ribosomal protein S14
YP_009246888.1	slr0823	63.25	166	61	0	1	166	1	166	1e-73	223	[R] COG0457 FOG: TPR repeat
YP_009246889.1	slr0469	57.14	210	77	3	1	206	1	201	2e-77	236	[J] COG0522 Ribosomal protein S4 and related proteins
YP_009246890.1	all3840	55.13	156	70	0	3	158	20	175	2e-62	194	[C] COG0852 NADH:ubiquinone oxidoreductase 27 kD subunit
YP_009246891.1	all3841	68.04	194	62	0	1	194	16	209	5e-95	283	[C] COG0377 NADH:ubiquinone oxidoreductase 20 kD subunit and related Fe-S oxidoreductases
YP_009246892.1	slr1279	64.17	120	43	0	1	120	1	120	4e-50	159	[C] COG0838 NADH:ubiquinone oxidoreductase subunit 3 (chain A)
YP_009246893.1	slr1330	42.75	131	72	1	1	128	30	160	5e-33	117	[C] COG0355 F0F1-type ATP synthase, epsilon subunit (mitochondrial delta subunit)
YP_009246894.1	all5039	81.3	476	89	0	12	487	2	477	0	791	[C] COG0055 F0F1-type ATP synthase, beta subunit
YP_009246895.1	alr1524	85.59	472	68	0	4	475	5	476	0	847	[G] COG1850 Ribulose 1,5-bisphosphate carboxylase, large subunit
YP_009246896.1	sll0336	46.73	321	122	4	193	508	32	308	2e-89	282	[I] COG0777 Acetyl-CoA carboxylase beta subunit
YP_009246908.1	asl4452	56.92	65	27	1	1	65	1	64	7e-18	73.6	[J] COG0267 Ribosomal protein L33
YP_009246909.1	asl4451	50.77	65	32	0	14	78	4	68	1e-16	72	[J] COG0238 Ribosomal protein S18
YP_009246910.1	BH3138	42.11	114	64	1	1	114	1	112	7e-20	82	[J] COG0292 Ribosomal protein L20
YP_009246911.1	sll1096	82.11	123	22	0	1	123	1	123	1e-69	209	[J] COG0048 Ribosomal protein S12
YP_009246912.1	all4357	40.51	195	107	2	1	191	1	190	7e-47	157	[OU] COG0740 Protease subunit of ATP-dependent Clp proteases
YP_009246917.1	alr3421	83.26	215	36	0	1	215	1	215	2e-136	387	[C] COG1290 Cytochrome b subunit of the bc complex
YP_009246918.1	alr3422	80.62	160	31	0	1	160	1	160	3e-92	270	[C] COG1290 Cytochrome b subunit of the bc complex
YP_009246919.1	all4191	36.28	317	177	4	13	323	4	301	6e-65	212	[K] COG0202 DNA-directed RNA polymerase, alpha subunit/40 kD subunit
YP_009246920.1	aq_073	54.31	116	53	0	25	140	10	125	6e-45	147	[J] COG0100 Ribosomal protein S11
YP_009246921.1	sml0006	78.95	38	7	1	1	37	1	38	2e-14	62.4	[J] COG0257 Ribosomal protein L36
YP_009246922.1	all4202	49.62	131	66	0	2	132	3	133	2e-43	143	[J] COG0096 Ribosomal protein S8
YP_009246923.1	all4205	66.39	122	41	0	1	122	1	122	1e-57	179	[J] COG0093 Ribosomal protein L14
YP_009246924.1	sll1805	72.73	132	36	0	1	132	1	132	3e-69	210	[J] COG0197 Ribosomal protein L16/L10E
YP_009246925.1	all4209	41.36	220	122	2	1	220	1	213	4e-51	171	[J] COG0092 Ribosomal protein S3
YP_009246926.1	all4210	51.4	107	52	0	8	114	6	112	2e-35	124	[J] COG0091 Ribosomal protein L22
YP_009246927.1	asl4211	69.57	92	28	0	1	92	1	92	8e-46	146	[J] COG0185 Ribosomal protein S19
YP_009246928.1	sll1802	57.09	275	114	2	3	274	3	276	1e-107	318	[J] COG0090 Ribosomal protein L2
YP_009246929.1	BMEI0759	42.86	84	48	0	2	85	8	91	2e-13	63.9	[J] COG0089 Ribosomal protein L23
YP_009246931.1	all4883	50.42	480	235	2	32	509	15	493	2e-159	469	[C] COG1007 NADH:ubiquinone oxidoreductase subunit 2 (chain N)
YP_009246932.1	all4339	43.59	117	54	1	1	105	1	117	7e-27	100	[J] COG0049 Ribosomal protein S7
YP_009246933.1	slr0844	46.54	722	326	9	1	721	1	663	0	575	[CP] COG1009 NADH:ubiquinone oxidoreductase subunit 5 (chain L)/Multisubunit Na+/H+ antiporter, MnhA subunit
YP_009246935.1	all0936	41.14	350	172	4	1	316	1	350	2e-80	253	[O] COG0755 ABC-type transport system involved in cytochrome c biogenesis, permease component
YP_009246936.1	alr3957	57.76	483	202	2	1	482	3	484	0	560	[C] COG1008 NADH:ubiquinone oxidoreductase subunit 4 (chain M)
YP_009246937.1	asr3463	88.89	81	9	0	1	81	1	81	7e-50	156	[C] COG1145 Ferredoxin
YP_009246938.1	sll0522	57	100	43	0	1	100	3	102	2e-22	87.4	[C] COG0713 NADH:ubiquinone oxidoreductase subunit 11 or 4L (chain K)
YP_009246939.1	sll0521	43.11	167	82	5	11	176	14	168	3e-29	110	[C] COG0839 NADH:ubiquinone oxidoreductase subunit 6 (chain J)
YP_009246940.1	alr0224	61.31	168	65	0	1	168	1	168	1e-77	234	[C] COG1143 Formate hydrogenlyase subunit 6/NADH:ubiquinone oxidoreductase 23 kD subunit (chain I)
YP_009246941.1	sll0519	62.77	325	118	1	40	361	40	364	1e-148	430	[C] COG1005 NADH:ubiquinone oxidoreductase subunit 1 (chain H)
YP_009246942.1	alr3355	70.69	389	113	1	6	393	6	394	0	603	[C] COG0649 NADH:ubiquinone oxidoreductase 49 kD subunit 7
YP_009246943.1	FN1979	48.57	70	36	0	15	84	15	84	3e-15	68.2	[J] COG0184 Ribosomal protein S15P/S13E
YP_009246945.1	all4339	43.59	117	54	1	1	105	1	117	7e-27	100	[J] COG0049 Ribosomal protein S7
YP_009246946.1	all4883	50.42	480	235	2	32	509	15	493	2e-159	469	[C] COG1007 NADH:ubiquinone oxidoreductase subunit 2 (chain N)
YP_009246948.1	BMEI0759	42.86	84	48	0	2	85	8	91	2e-13	63.9	[J] COG0089 Ribosomal protein L23
YP_009246949.1	sll1096	82.11	123	22	0	1	123	1	123	1e-69	209	[J] COG0048 Ribosomal protein S12
YP_009246952.1	ssr0482	48.78	82	42	0	1	82	1	82	2e-22	86.7	[J] COG0228 Ribosomal protein S16
YP_009246955.1	all0005	72.6	500	135	2	3	501	4	502	0	742	[C] COG0056 F0F1-type ATP synthase, alpha subunit
YP_009246956.1	sll1324	24.86	177	133	0	1	177	1	177	2e-15	72.8	[C] COG0711 F0F1-type ATP synthase, subunit b
YP_009246957.1	asl0009	94.92	59	3	0	22	80	22	80	4e-32	110	[C] COG0636 F0F1-type ATP synthase, subunit c/Archaeal/vacuolar-type H+-ATPase, subunit K
YP_009246958.1	sll1322	69.36	235	70	2	14	246	38	272	1e-101	302	[C] COG0356 F0F1-type ATP synthase, subunit a
YP_009246959.1	all4792	50.45	222	110	0	8	229	4	225	3e-84	256	[J] COG0052 Ribosomal protein S2
YP_009246960.1	sll1789	32.43	959	553	25	7	941	1	888	3e-128	434	[K] COG0086 DNA-directed RNA polymerase, beta' subunit/160 kD subunit
YP_009246961.1	alr1595	45.85	663	305	7	10	669	12	623	0	561	[K] COG0086 DNA-directed RNA polymerase, beta' subunit/160 kD subunit
YP_009246962.1	alr1594	46.88	1075	522	12	12	1054	27	1084	0	979	[K] COG0085 DNA-directed RNA polymerase, beta subunit/140 kD subunit
YP_009246968.1	slr0628	53	100	47	0	1	100	1	100	2e-29	105	[J] COG0199 Ribosomal protein S14
YP_009246971.1	slr0823	63.25	166	61	0	1	166	1	166	1e-73	223	[R] COG0457 FOG: TPR repeat
YP_009246972.1	slr0469	57.14	210	77	3	1	206	1	201	2e-77	236	[J] COG0522 Ribosomal protein S4 and related proteins
YP_009246973.1	all3840	55.13	156	70	0	3	158	20	175	2e-62	194	[C] COG0852 NADH:ubiquinone oxidoreductase 27 kD subunit
YP_009246974.1	all3841	68.04	194	62	0	1	194	16	209	5e-95	283	[C] COG0377 NADH:ubiquinone oxidoreductase 20 kD subunit and related Fe-S oxidoreductases
YP_009246975.1	slr1279	64.17	120	43	0	1	120	1	120	4e-50	159	[C] COG0838 NADH:ubiquinone oxidoreductase subunit 3 (chain A)
YP_009246976.1	slr1330	42.75	131	72	1	1	128	30	160	5e-33	117	[C] COG0355 F0F1-type ATP synthase, epsilon subunit (mitochondrial delta subunit)
YP_009246977.1	all5039	81.3	476	89	0	12	487	2	477	0	791	[C] COG0055 F0F1-type ATP synthase, beta subunit
YP_009246978.1	alr1524	85.59	472	68	0	4	475	5	476	0	847	[G] COG1850 Ribulose 1,5-bisphosphate carboxylase, large subunit
YP_009246979.1	sll0336	46.73	321	122	4	193	508	32	308	2e-89	282	[I] COG0777 Acetyl-CoA carboxylase beta subunit
YP_009246991.1	asl4452	56.92	65	27	1	1	65	1	64	7e-18	73.6	[J] COG0267 Ribosomal protein L33
YP_009246992.1	asl4451	50.77	65	32	0	14	78	4	68	1e-16	72	[J] COG0238 Ribosomal protein S18
YP_009246993.1	BH3138	42.11	114	64	1	1	114	1	112	7e-20	82	[J] COG0292 Ribosomal protein L20
YP_009246994.1	sll1096	82.11	123	22	0	1	123	1	123	1e-69	209	[J] COG0048 Ribosomal protein S12
YP_009246995.1	all4357	40.51	195	107	2	1	191	1	190	7e-47	157	[OU] COG0740 Protease subunit of ATP-dependent Clp proteases
YP_009247000.1	alr3421	83.26	215	36	0	1	215	1	215	2e-136	387	[C] COG1290 Cytochrome b subunit of the bc complex
YP_009247001.1	alr3422	80.62	160	31	0	1	160	1	160	3e-92	270	[C] COG1290 Cytochrome b subunit of the bc complex
YP_009247002.1	all4191	36.28	317	177	4	13	323	4	301	6e-65	212	[K] COG0202 DNA-directed RNA polymerase, alpha subunit/40 kD subunit
YP_009247003.1	aq_073	54.31	116	53	0	25	140	10	125	6e-45	147	[J] COG0100 Ribosomal protein S11
YP_009247004.1	sml0006	78.95	38	7	1	1	37	1	38	2e-14	62.4	[J] COG0257 Ribosomal protein L36
YP_009247005.1	all4202	49.62	131	66	0	2	132	3	133	2e-43	143	[J] COG0096 Ribosomal protein S8
YP_009247006.1	all4205	66.39	122	41	0	1	122	1	122	1e-57	179	[J] COG0093 Ribosomal protein L14
YP_009247007.1	sll1805	72.73	132	36	0	1	132	1	132	3e-69	210	[J] COG0197 Ribosomal protein L16/L10E
YP_009247008.1	all4209	41.36	220	122	2	1	220	1	213	2e-51	171	[J] COG0092 Ribosomal protein S3
YP_009247009.1	all4210	51.4	107	52	0	8	114	6	112	2e-35	124	[J] COG0091 Ribosomal protein L22
YP_009247010.1	asl4211	69.57	92	28	0	1	92	1	92	8e-46	146	[J] COG0185 Ribosomal protein S19
YP_009247011.1	sll1802	57.09	275	114	2	3	274	3	276	1e-107	318	[J] COG0090 Ribosomal protein L2
YP_009247012.1	BMEI0759	44.05	84	47	0	2	85	8	91	7e-14	65.1	[J] COG0089 Ribosomal protein L23
YP_009247014.1	all4883	50.42	480	235	2	32	509	15	493	2e-159	469	[C] COG1007 NADH:ubiquinone oxidoreductase subunit 2 (chain N)
YP_009247015.1	all4339	43.59	117	54	1	1	105	1	117	7e-27	100	[J] COG0049 Ribosomal protein S7
YP_009247016.1	slr0844	46.14	726	323	9	1	721	1	663	0	574	[CP] COG1009 NADH:ubiquinone oxidoreductase subunit 5 (chain L)/Multisubunit Na+/H+ antiporter, MnhA subunit
YP_009247018.1	all0936	41.14	350	172	4	1	316	1	350	2e-80	253	[O] COG0755 ABC-type transport system involved in cytochrome c biogenesis, permease component
YP_009247019.1	alr3957	57.76	483	202	2	1	482	3	484	0	560	[C] COG1008 NADH:ubiquinone oxidoreductase subunit 4 (chain M)
YP_009247020.1	asr3463	88.89	81	9	0	1	81	1	81	7e-50	156	[C] COG1145 Ferredoxin
YP_009247021.1	sll0522	57	100	43	0	1	100	3	102	2e-22	87.4	[C] COG0713 NADH:ubiquinone oxidoreductase subunit 11 or 4L (chain K)
YP_009247022.1	sll0521	43.11	167	82	5	11	176	14	168	3e-29	110	[C] COG0839 NADH:ubiquinone oxidoreductase subunit 6 (chain J)
YP_009247023.1	alr0224	61.31	168	65	0	1	168	1	168	1e-77	234	[C] COG1143 Formate hydrogenlyase subunit 6/NADH:ubiquinone oxidoreductase 23 kD subunit (chain I)
YP_009247024.1	sll0519	62.46	325	119	1	40	361	40	364	4e-148	429	[C] COG1005 NADH:ubiquinone oxidoreductase subunit 1 (chain H)
YP_009247025.1	alr3355	70.95	389	112	1	6	393	6	394	0	605	[C] COG0649 NADH:ubiquinone oxidoreductase 49 kD subunit 7
YP_009247026.1	FN1979	48.57	70	36	0	15	84	15	84	3e-15	68.2	[J] COG0184 Ribosomal protein S15P/S13E
YP_009247028.1	all4339	43.59	117	54	1	1	105	1	117	7e-27	100	[J] COG0049 Ribosomal protein S7
YP_009247029.1	all4883	50.42	480	235	2	32	509	15	493	2e-159	469	[C] COG1007 NADH:ubiquinone oxidoreductase subunit 2 (chain N)
YP_009247031.1	BMEI0759	44.05	84	47	0	2	85	8	91	7e-14	65.1	[J] COG0089 Ribosomal protein L23
YP_009251351.1	sll1096	83.74	123	20	0	1	123	1	123	1e-70	212	[J] COG0048 Ribosomal protein S12
YP_009251354.1	ssr0482	50	82	41	0	1	82	1	82	4e-22	85.5	[J] COG0228 Ribosomal protein S16
YP_009251357.1	sll1326	71.86	501	141	0	1	501	1	501	0	748	[C] COG0056 F0F1-type ATP synthase, alpha subunit
YP_009251358.1	sll1324	25.71	175	125	1	8	182	8	177	2e-14	70.5	[C] COG0711 F0F1-type ATP synthase, subunit b
YP_009251359.1	asl0009	94.92	59	3	0	22	80	22	80	4e-32	110	[C] COG0636 F0F1-type ATP synthase, subunit c/Archaeal/vacuolar-type H+-ATPase, subunit K
YP_009251360.1	all0010	70.18	228	67	1	17	243	12	239	1e-100	298	[C] COG0356 F0F1-type ATP synthase, subunit a
YP_009251361.1	all4792	52.49	221	105	0	8	228	4	224	3e-89	269	[J] COG0052 Ribosomal protein S2
YP_009251362.1	sll1789	34.4	843	471	23	7	827	1	783	7e-127	430	[K] COG0086 DNA-directed RNA polymerase, beta' subunit/160 kD subunit
YP_009251363.1	alr1595	46	663	304	9	17	676	12	623	0	564	[K] COG0086 DNA-directed RNA polymerase, beta' subunit/160 kD subunit
YP_009251364.1	alr1594	47.2	1070	525	10	12	1053	27	1084	0	996	[K] COG0085 DNA-directed RNA polymerase, beta subunit/140 kD subunit
YP_009251370.1	slr0628	53	100	47	0	1	100	1	100	8e-31	108	[J] COG0199 Ribosomal protein S14
YP_009251373.1	slr0823	62.5	168	63	0	1	168	1	168	3e-73	223	[R] COG0457 FOG: TPR repeat
YP_009251374.1	slr0469	58.05	205	79	3	1	201	1	202	3e-79	240	[J] COG0522 Ribosomal protein S4 and related proteins
YP_009251375.1	all3840	56.41	156	68	0	3	158	20	175	6e-64	198	[C] COG0852 NADH:ubiquinone oxidoreductase 27 kD subunit
YP_009251376.1	slr1280	70.74	188	54	1	15	201	34	221	3e-96	286	[C] COG0377 NADH:ubiquinone oxidoreductase 20 kD subunit and related Fe-S oxidoreductases
YP_009251377.1	slr1279	63.33	120	44	0	1	120	1	120	1e-49	159	[C] COG0838 NADH:ubiquinone oxidoreductase subunit 3 (chain A)
YP_009251378.1	slr1330	43.51	131	71	1	1	128	30	160	4e-34	120	[C] COG0355 F0F1-type ATP synthase, epsilon subunit (mitochondrial delta subunit)
YP_009251379.1	all5039	81.38	478	87	1	12	489	2	477	0	792	[C] COG0055 F0F1-type ATP synthase, beta subunit
YP_009251380.1	alr1524	85.59	472	68	0	4	475	5	476	0	846	[G] COG1850 Ribulose 1,5-bisphosphate carboxylase, large subunit
YP_009251392.1	asl4452	60	65	25	1	1	65	1	64	3e-20	79.3	[J] COG0267 Ribosomal protein L33
YP_009251393.1	asl4451	55.22	67	30	0	14	80	4	70	1e-19	79.7	[J] COG0238 Ribosomal protein S18
YP_009251394.1	alr3428	50.43	117	56	1	1	117	1	115	2e-22	88.6	[J] COG0292 Ribosomal protein L20
YP_009251395.1	all4357	53.57	196	90	1	1	196	1	195	4e-75	229	[OU] COG0740 Protease subunit of ATP-dependent Clp proteases
YP_009251399.1	alr3421	83.26	215	36	0	3	217	1	215	8e-136	385	[C] COG1290 Cytochrome b subunit of the bc complex
YP_009251400.1	alr3422	80.62	160	31	0	1	160	1	160	2e-92	271	[C] COG1290 Cytochrome b subunit of the bc complex
YP_009251401.1	all4191	36.28	328	186	5	13	336	4	312	7e-66	214	[K] COG0202 DNA-directed RNA polymerase, alpha subunit/40 kD subunit
YP_009251402.1	sll1817	56.45	124	54	0	15	138	7	130	6e-46	150	[J] COG0100 Ribosomal protein S11
YP_009251403.1	asl4194	78.38	37	8	0	1	37	1	37	1e-14	63.2	[J] COG0257 Ribosomal protein L36
YP_009251404.1	asl4195	60.81	74	28	1	1	73	1	74	4e-25	92.8	[J] COG0361 Translation initiation factor 1 (IF-1)
YP_009251405.1	all4202	49.61	129	65	0	4	132	5	133	2e-42	140	[J] COG0096 Ribosomal protein S8
YP_009251406.1	all4205	70.49	122	36	0	1	122	1	122	8e-61	187	[J] COG0093 Ribosomal protein L14
YP_009251407.1	sll1805	71.97	132	37	0	1	132	1	132	2e-68	207	[J] COG0197 Ribosomal protein L16/L10E
YP_009251408.1	sll1804	44.39	214	110	3	1	214	1	205	3e-50	167	[J] COG0092 Ribosomal protein S3
YP_009251409.1	sll1803	48.25	114	59	0	1	114	1	114	5e-35	123	[J] COG0091 Ribosomal protein L22
YP_009251410.1	asl4211	67.39	92	30	0	1	92	1	92	3e-44	142	[J] COG0185 Ribosomal protein S19
YP_009251411.1	sll1802	56.32	277	117	2	1	274	1	276	1e-106	315	[J] COG0090 Ribosomal protein L2
YP_009251412.1	sll1801	36.9	84	53	0	2	85	12	95	3e-14	65.5	[J] COG0089 Ribosomal protein L23
YP_009251414.1	all4883	50.42	480	235	2	32	509	15	493	8e-159	467	[C] COG1007 NADH:ubiquinone oxidoreductase subunit 2 (chain N)
YP_009251415.1	all4339	56.77	155	67	0	1	155	1	155	9e-61	189	[J] COG0049 Ribosomal protein S7
YP_009251417.1	slr0844	46.18	719	340	10	1	713	1	678	0	580	[CP] COG1009 NADH:ubiquinone oxidoreductase subunit 5 (chain L)/Multisubunit Na+/H+ antiporter, MnhA subunit
YP_009251418.1	asl3674	55.81	43	19	0	1	43	1	43	3e-06	42	[J] COG0333 Ribosomal protein L32
YP_009251419.1	all0936	40.29	350	177	4	1	318	1	350	5e-80	252	[O] COG0755 ABC-type transport system involved in cytochrome c biogenesis, permease component
YP_009251420.1	alr3957	56.76	481	206	2	3	482	5	484	0	556	[C] COG1008 NADH:ubiquinone oxidoreductase subunit 4 (chain M)
YP_009251421.1	asr3463	88.89	81	9	0	1	81	1	81	7e-50	156	[C] COG1145 Ferredoxin
YP_009251422.1	sll0522	58	100	42	0	1	100	3	102	6e-23	89	[C] COG0713 NADH:ubiquinone oxidoreductase subunit 11 or 4L (chain K)
YP_009251423.1	sll0521	42.17	166	85	3	11	176	14	168	5e-29	110	[C] COG0839 NADH:ubiquinone oxidoreductase subunit 6 (chain J)
YP_009251424.1	alr0224	60.82	171	67	0	1	171	1	171	4e-77	233	[C] COG1143 Formate hydrogenlyase subunit 6/NADH:ubiquinone oxidoreductase 23 kD subunit (chain I)
YP_009251425.1	sll0519	58.45	361	132	3	10	361	13	364	3e-148	429	[C] COG1005 NADH:ubiquinone oxidoreductase subunit 1 (chain H)
YP_009251426.1	alr3355	71.47	389	110	1	6	393	6	394	0	613	[C] COG0649 NADH:ubiquinone oxidoreductase 49 kD subunit 7
YP_009251427.1	FN1979	51.43	70	34	0	13	82	15	84	5e-16	70.1	[J] COG0184 Ribosomal protein S15P/S13E
YP_009251429.1	all4339	56.77	155	67	0	1	155	1	155	9e-61	189	[J] COG0049 Ribosomal protein S7
YP_009251430.1	all4883	50.42	480	235	2	32	509	15	493	8e-159	467	[C] COG1007 NADH:ubiquinone oxidoreductase subunit 2 (chain N)
YP_009251432.1	sll1801	36.9	84	53	0	2	85	12	95	3e-14	65.5	[J] COG0089 Ribosomal protein L23
YP_009251433.1	sll1802	56.32	277	117	2	1	274	1	276	1e-106	315	[J] COG0090 Ribosomal protein L2
YP_009251434.1	asl4211	71.43	35	10	0	1	35	1	35	3e-11	55.1	[J] COG0185 Ribosomal protein S19
YP_009251435.1	sll1096	82.93	123	21	0	1	123	1	123	2e-70	211	[J] COG0048 Ribosomal protein S12
YP_009251438.1	ssr0482	52.56	78	37	0	1	78	1	78	7e-22	84.7	[J] COG0228 Ribosomal protein S16
YP_009251441.1	sll1326	72.26	501	139	0	1	501	1	501	0	754	[C] COG0056 F0F1-type ATP synthase, alpha subunit
YP_009251442.1	sll1324	26.32	171	121	1	12	182	12	177	5e-15	71.6	[C] COG0711 F0F1-type ATP synthase, subunit b
YP_009251443.1	asl0009	94.92	59	3	0	22	80	22	80	4e-32	110	[C] COG0636 F0F1-type ATP synthase, subunit c/Archaeal/vacuolar-type H+-ATPase, subunit K
YP_009251444.1	all0010	69.74	228	68	1	17	243	12	239	2e-100	298	[C] COG0356 F0F1-type ATP synthase, subunit a
YP_009251445.1	all4792	49.12	226	115	0	8	233	4	229	2e-85	259	[J] COG0052 Ribosomal protein S2
YP_009251446.1	sll1789	35.52	839	467	23	7	827	1	783	8e-127	430	[K] COG0086 DNA-directed RNA polymerase, beta' subunit/160 kD subunit
YP_009251447.1	alr1595	46.3	663	302	9	17	676	12	623	0	569	[K] COG0086 DNA-directed RNA polymerase, beta' subunit/160 kD subunit
YP_009251448.1	alr1594	47.57	1070	521	10	12	1053	27	1084	0	1000	[K] COG0085 DNA-directed RNA polymerase, beta subunit/140 kD subunit
YP_009251454.1	slr0628	53	100	47	0	1	100	1	100	6e-30	106	[J] COG0199 Ribosomal protein S14
YP_009251457.1	slr0823	62.13	169	63	1	1	169	1	168	3e-71	217	[R] COG0457 FOG: TPR repeat
YP_009251458.1	slr0469	58.13	203	82	2	1	201	1	202	9e-80	241	[J] COG0522 Ribosomal protein S4 and related proteins
YP_009251459.1	all3840	56.77	155	67	0	3	157	20	174	8e-64	198	[C] COG0852 NADH:ubiquinone oxidoreductase 27 kD subunit
YP_009251460.1	all3841	68.56	194	61	0	1	194	16	209	2e-96	286	[C] COG0377 NADH:ubiquinone oxidoreductase 20 kD subunit and related Fe-S oxidoreductases
YP_009251461.1	slr1279	64.17	120	43	0	1	120	1	120	1e-50	160	[C] COG0838 NADH:ubiquinone oxidoreductase subunit 3 (chain A)
YP_009251462.1	slr1330	45.04	131	69	1	1	128	30	160	2e-35	124	[C] COG0355 F0F1-type ATP synthase, epsilon subunit (mitochondrial delta subunit)
YP_009251463.1	all5039	81.09	476	90	0	12	487	2	477	0	788	[C] COG0055 F0F1-type ATP synthase, beta subunit
YP_009251464.1	alr1524	85.17	472	70	0	4	475	5	476	0	844	[G] COG1850 Ribulose 1,5-bisphosphate carboxylase, large subunit
YP_009251476.1	asl4452	59.38	64	26	0	1	64	1	64	9e-22	83.6	[J] COG0267 Ribosomal protein L33
YP_009251477.1	asl4451	53.73	67	31	0	14	80	4	70	5e-19	77.8	[J] COG0238 Ribosomal protein S18
YP_009251478.1	alr3428	51.33	113	53	1	1	113	1	111	2e-22	88.6	[J] COG0292 Ribosomal protein L20
YP_009251479.1	all4357	47.18	195	102	1	1	195	1	194	2e-62	197	[OU] COG0740 Protease subunit of ATP-dependent Clp proteases
YP_009251483.1	alr3421	82.79	215	37	0	5	219	1	215	2e-134	382	[C] COG1290 Cytochrome b subunit of the bc complex
YP_009251484.1	alr3422	80.62	160	31	0	1	160	1	160	2e-92	271	[C] COG1290 Cytochrome b subunit of the bc complex
YP_009251485.1	aq_073	51.3	115	56	0	40	154	11	125	2e-43	144	[J] COG0100 Ribosomal protein S11
YP_009251486.1	asl4194	78.38	37	8	0	1	37	1	37	6e-14	61.2	[J] COG0257 Ribosomal protein L36
YP_009251487.1	aq_075a	56.52	69	30	0	2	70	12	80	3e-22	85.5	[J] COG0361 Translation initiation factor 1 (IF-1)
YP_009251488.1	all4202	49.61	129	65	0	4	132	5	133	1e-40	136	[J] COG0096 Ribosomal protein S8
YP_009251489.1	all4205	65.57	122	42	0	1	122	1	122	7e-58	179	[J] COG0093 Ribosomal protein L14
YP_009251490.1	sll1805	72.73	132	36	0	1	132	1	132	6e-70	211	[J] COG0197 Ribosomal protein L16/L10E
YP_009251491.1	sll1804	42.4	217	116	3	1	217	1	208	2e-49	165	[J] COG0092 Ribosomal protein S3
YP_009251492.1	all4210	50.47	107	53	0	8	114	6	112	2e-33	119	[J] COG0091 Ribosomal protein L22
YP_009251493.1	asl4211	65.56	90	31	0	6	95	3	92	9e-43	139	[J] COG0185 Ribosomal protein S19
YP_009251494.1	sll1802	58.5	253	104	1	19	271	25	276	4e-103	306	[J] COG0090 Ribosomal protein L2
YP_009251495.1	sll1801	36.9	84	53	0	2	85	12	95	2e-13	63.9	[J] COG0089 Ribosomal protein L23
YP_009251497.1	all4883	50	480	237	2	32	509	15	493	1e-156	462	[C] COG1007 NADH:ubiquinone oxidoreductase subunit 2 (chain N)
YP_009251498.1	all4339	56.13	155	68	0	1	155	1	155	4e-59	185	[J] COG0049 Ribosomal protein S7
YP_009251499.1	slr0844	45.82	718	329	10	6	723	6	663	0	569	[CP] COG1009 NADH:ubiquinone oxidoreductase subunit 5 (chain L)/Multisubunit Na+/H+ antiporter, MnhA subunit
YP_009251500.1	asl3674	58.14	43	18	0	1	43	1	43	5e-07	44.3	[J] COG0333 Ribosomal protein L32
YP_009251501.1	sll1513	42.14	337	170	5	1	316	1	333	1e-81	255	[O] COG0755 ABC-type transport system involved in cytochrome c biogenesis, permease component
YP_009251502.1	alr3957	56.76	481	206	2	3	482	5	484	0	555	[C] COG1008 NADH:ubiquinone oxidoreductase subunit 4 (chain M)
YP_009251503.1	asr3463	88.89	81	9	0	1	81	1	81	7e-50	156	[C] COG1145 Ferredoxin
YP_009251504.1	sll0522	57	100	43	0	1	100	3	102	2e-21	84.7	[C] COG0713 NADH:ubiquinone oxidoreductase subunit 11 or 4L (chain K)
YP_009251505.1	sll0521	42.77	166	84	3	11	176	14	168	9e-30	112	[C] COG0839 NADH:ubiquinone oxidoreductase subunit 6 (chain J)
YP_009251506.1	sll0520	69.93	143	43	0	10	152	11	153	4e-77	233	[C] COG1143 Formate hydrogenlyase subunit 6/NADH:ubiquinone oxidoreductase 23 kD subunit (chain I)
YP_009251507.1	sll0519	62.15	325	120	1	40	361	40	364	7e-146	423	[C] COG1005 NADH:ubiquinone oxidoreductase subunit 1 (chain H)
YP_009251508.1	alr3355	72.24	389	107	1	6	393	6	394	0	614	[C] COG0649 NADH:ubiquinone oxidoreductase 49 kD subunit 7
YP_009251509.1	FN1979	47.89	71	37	0	16	86	15	85	1e-14	66.6	[J] COG0184 Ribosomal protein S15P/S13E
YP_009251510.1	all4339	56.13	155	68	0	1	155	1	155	4e-59	185	[J] COG0049 Ribosomal protein S7
YP_009251511.1	all4883	46.69	514	237	3	32	543	15	493	2e-149	444	[C] COG1007 NADH:ubiquinone oxidoreductase subunit 2 (chain N)
YP_009251513.1	sll1801	36.9	84	53	0	2	85	12	95	2e-13	63.9	[J] COG0089 Ribosomal protein L23
YP_009251514.1	sll1802	58.5	253	104	1	19	271	25	276	4e-103	306	[J] COG0090 Ribosomal protein L2
YP_009251515.1	asl4211	65.56	90	31	0	6	95	3	92	9e-43	139	[J] COG0185 Ribosomal protein S19
YP_009251516.1	all4210	50.47	107	53	0	8	114	6	112	2e-33	119	[J] COG0091 Ribosomal protein L22
YP_009251517.1	sll1804	42.4	217	116	3	1	217	1	208	2e-49	165	[J] COG0092 Ribosomal protein S3
YP_009251518.1	sll1805	72.73	132	36	0	1	132	1	132	6e-70	211	[J] COG0197 Ribosomal protein L16/L10E
YP_009251519.1	all4205	65.57	122	42	0	1	122	1	122	7e-58	179	[J] COG0093 Ribosomal protein L14
YP_009251520.1	all4202	49.61	129	65	0	4	132	5	133	1e-40	136	[J] COG0096 Ribosomal protein S8
YP_009251521.1	aq_075a	56.52	69	30	0	2	70	12	80	3e-22	85.5	[J] COG0361 Translation initiation factor 1 (IF-1)
YP_009251522.1	asl4194	78.38	37	8	0	1	37	1	37	6e-14	61.2	[J] COG0257 Ribosomal protein L36
YP_009251523.1	aq_073	51.3	115	56	0	40	154	11	125	2e-43	144	[J] COG0100 Ribosomal protein S11
YP_009251524.1	alr3422	80.62	160	31	0	1	160	1	160	2e-92	271	[C] COG1290 Cytochrome b subunit of the bc complex
YP_009251525.1	alr3421	82.79	215	37	0	5	219	1	215	2e-134	382	[C] COG1290 Cytochrome b subunit of the bc complex
YP_009251529.1	sll1096	82.93	123	21	0	1	123	1	123	2e-70	211	[J] COG0048 Ribosomal protein S12
YP_009251532.1	ssr0482	52.56	78	37	0	1	78	1	78	7e-22	84.7	[J] COG0228 Ribosomal protein S16
YP_009251535.1	sll1326	72.26	501	139	0	1	501	1	501	0	754	[C] COG0056 F0F1-type ATP synthase, alpha subunit
YP_009251536.1	sll1324	26.32	171	121	1	12	182	12	177	5e-15	71.6	[C] COG0711 F0F1-type ATP synthase, subunit b
YP_009251537.1	asl0009	94.92	59	3	0	22	80	22	80	4e-32	110	[C] COG0636 F0F1-type ATP synthase, subunit c/Archaeal/vacuolar-type H+-ATPase, subunit K
YP_009251538.1	all0010	69.74	228	68	1	17	243	12	239	2e-100	298	[C] COG0356 F0F1-type ATP synthase, subunit a
YP_009251539.1	all4792	49.12	226	115	0	8	233	4	229	2e-85	259	[J] COG0052 Ribosomal protein S2
YP_009251540.1	sll1789	35.52	839	467	23	7	827	1	783	8e-127	430	[K] COG0086 DNA-directed RNA polymerase, beta' subunit/160 kD subunit
YP_009251541.1	alr1595	46.3	663	302	9	17	676	12	623	0	569	[K] COG0086 DNA-directed RNA polymerase, beta' subunit/160 kD subunit
YP_009251542.1	alr1594	47.57	1070	521	10	12	1053	27	1084	0	999	[K] COG0085 DNA-directed RNA polymerase, beta subunit/140 kD subunit
YP_009251548.1	slr0628	53	100	47	0	1	100	1	100	6e-30	106	[J] COG0199 Ribosomal protein S14
YP_009251551.1	slr0823	62.13	169	63	1	1	169	1	168	3e-71	217	[R] COG0457 FOG: TPR repeat
YP_009251552.1	slr0469	58.13	203	82	2	1	201	1	202	9e-80	241	[J] COG0522 Ribosomal protein S4 and related proteins
YP_009251553.1	all3840	56.77	155	67	0	3	157	20	174	8e-64	198	[C] COG0852 NADH:ubiquinone oxidoreductase 27 kD subunit
YP_009251554.1	all3841	68.56	194	61	0	1	194	16	209	2e-96	286	[C] COG0377 NADH:ubiquinone oxidoreductase 20 kD subunit and related Fe-S oxidoreductases
YP_009251555.1	slr1279	64.17	120	43	0	1	120	1	120	1e-50	160	[C] COG0838 NADH:ubiquinone oxidoreductase subunit 3 (chain A)
YP_009251556.1	slr1330	45.04	131	69	1	1	128	30	160	2e-35	124	[C] COG0355 F0F1-type ATP synthase, epsilon subunit (mitochondrial delta subunit)
YP_009251557.1	all5039	81.09	476	90	0	12	487	2	477	0	788	[C] COG0055 F0F1-type ATP synthase, beta subunit
YP_009251558.1	alr1524	85.17	472	70	0	4	475	5	476	0	844	[G] COG1850 Ribulose 1,5-bisphosphate carboxylase, large subunit
YP_009251570.1	asl4452	59.38	64	26	0	1	64	1	64	9e-22	83.6	[J] COG0267 Ribosomal protein L33
YP_009251571.1	asl4451	53.73	67	31	0	14	80	4	70	5e-19	77.8	[J] COG0238 Ribosomal protein S18
YP_009251572.1	all4357	47.18	195	102	1	1	195	1	194	2e-62	197	[OU] COG0740 Protease subunit of ATP-dependent Clp proteases
YP_009251577.1	alr3421	82.79	215	37	0	5	219	1	215	2e-134	382	[C] COG1290 Cytochrome b subunit of the bc complex
YP_009251578.1	alr3422	80.62	160	31	0	1	160	1	160	2e-92	271	[C] COG1290 Cytochrome b subunit of the bc complex
YP_009251579.1	aq_073	51.3	115	56	0	40	154	11	125	2e-43	144	[J] COG0100 Ribosomal protein S11
YP_009251580.1	asl4194	78.38	37	8	0	1	37	1	37	6e-14	61.2	[J] COG0257 Ribosomal protein L36
YP_009251581.1	aq_075a	56.52	69	30	0	2	70	12	80	3e-22	85.5	[J] COG0361 Translation initiation factor 1 (IF-1)
YP_009251582.1	all4202	49.61	129	65	0	4	132	5	133	1e-40	136	[J] COG0096 Ribosomal protein S8
YP_009251583.1	all4205	65.57	122	42	0	1	122	1	122	7e-58	179	[J] COG0093 Ribosomal protein L14
YP_009251584.1	sll1805	72.73	132	36	0	1	132	1	132	6e-70	211	[J] COG0197 Ribosomal protein L16/L10E
YP_009251585.1	sll1804	42.4	217	116	3	1	217	1	208	2e-49	165	[J] COG0092 Ribosomal protein S3
YP_009251586.1	all4210	50.47	107	53	0	8	114	6	112	2e-33	119	[J] COG0091 Ribosomal protein L22
YP_009251587.1	asl4211	65.56	90	31	0	6	95	3	92	9e-43	139	[J] COG0185 Ribosomal protein S19
YP_009251588.1	sll1802	58.5	253	104	1	19	271	25	276	4e-103	306	[J] COG0090 Ribosomal protein L2
YP_009251589.1	sll1801	36.9	84	53	0	2	85	12	95	2e-13	63.9	[J] COG0089 Ribosomal protein L23
YP_009251591.1	all4883	50	480	237	2	32	509	15	493	1e-156	462	[C] COG1007 NADH:ubiquinone oxidoreductase subunit 2 (chain N)
YP_009251592.1	all4339	56.13	155	68	0	1	155	1	155	4e-59	185	[J] COG0049 Ribosomal protein S7
YP_009251593.1	slr0844	45.82	718	329	10	6	723	6	663	0	569	[CP] COG1009 NADH:ubiquinone oxidoreductase subunit 5 (chain L)/Multisubunit Na+/H+ antiporter, MnhA subunit
YP_009251594.1	asl3674	58.14	43	18	0	1	43	1	43	5e-07	44.3	[J] COG0333 Ribosomal protein L32
YP_009251595.1	sll1513	42.14	337	170	5	1	316	1	333	1e-81	255	[O] COG0755 ABC-type transport system involved in cytochrome c biogenesis, permease component
YP_009251596.1	alr3957	56.76	481	206	2	3	482	5	484	0	555	[C] COG1008 NADH:ubiquinone oxidoreductase subunit 4 (chain M)
YP_009251597.1	asr3463	88.89	81	9	0	1	81	1	81	7e-50	156	[C] COG1145 Ferredoxin
YP_009251598.1	sll0522	57	100	43	0	1	100	3	102	2e-21	84.7	[C] COG0713 NADH:ubiquinone oxidoreductase subunit 11 or 4L (chain K)
YP_009251599.1	sll0521	42.77	166	84	3	11	176	14	168	9e-30	112	[C] COG0839 NADH:ubiquinone oxidoreductase subunit 6 (chain J)
YP_009251600.1	sll0520	69.93	143	43	0	10	152	11	153	4e-77	233	[C] COG1143 Formate hydrogenlyase subunit 6/NADH:ubiquinone oxidoreductase 23 kD subunit (chain I)
YP_009251601.1	sll0519	62.15	325	120	1	40	361	40	364	7e-146	423	[C] COG1005 NADH:ubiquinone oxidoreductase subunit 1 (chain H)
YP_009251602.1	alr3355	72.24	389	107	1	6	393	6	394	0	614	[C] COG0649 NADH:ubiquinone oxidoreductase 49 kD subunit 7
YP_009251603.1	FN1979	47.89	71	37	0	16	86	15	85	1e-14	66.6	[J] COG0184 Ribosomal protein S15P/S13E
YP_009251604.1	all4339	56.13	155	68	0	1	155	1	155	4e-59	185	[J] COG0049 Ribosomal protein S7
YP_009251605.1	all4883	46.69	514	237	3	32	543	15	493	2e-149	444	[C] COG1007 NADH:ubiquinone oxidoreductase subunit 2 (chain N)
YP_009251607.1	sll1801	36.9	84	53	0	2	85	12	95	2e-13	63.9	[J] COG0089 Ribosomal protein L23
YP_009251608.1	sll1802	58.5	253	104	1	19	271	25	276	4e-103	306	[J] COG0090 Ribosomal protein L2
YP_009251609.1	asl4211	65.56	90	31	0	6	95	3	92	9e-43	139	[J] COG0185 Ribosomal protein S19
YP_009251610.1	all4210	50.47	107	53	0	8	114	6	112	2e-33	119	[J] COG0091 Ribosomal protein L22
YP_009251611.1	sll1804	42.4	217	116	3	1	217	1	208	2e-49	165	[J] COG0092 Ribosomal protein S3
YP_009251612.1	sll1805	72.73	132	36	0	1	132	1	132	6e-70	211	[J] COG0197 Ribosomal protein L16/L10E
YP_009251613.1	all4205	65.57	122	42	0	1	122	1	122	7e-58	179	[J] COG0093 Ribosomal protein L14
YP_009251614.1	all4202	49.61	129	65	0	4	132	5	133	1e-40	136	[J] COG0096 Ribosomal protein S8
YP_009251615.1	aq_075a	56.52	69	30	0	2	70	12	80	3e-22	85.5	[J] COG0361 Translation initiation factor 1 (IF-1)
YP_009251616.1	asl4194	78.38	37	8	0	1	37	1	37	6e-14	61.2	[J] COG0257 Ribosomal protein L36
YP_009251617.1	aq_073	51.3	115	56	0	40	154	11	125	2e-43	144	[J] COG0100 Ribosomal protein S11
YP_009251618.1	alr3422	80.62	160	31	0	1	160	1	160	2e-92	271	[C] COG1290 Cytochrome b subunit of the bc complex
YP_009251619.1	alr3421	82.79	215	37	0	5	219	1	215	2e-134	382	[C] COG1290 Cytochrome b subunit of the bc complex
YP_740181.1	sll1096	84.35	115	18	0	1	115	1	115	7e-67	202	[J] COG0048 Ribosomal protein S12
YP_740184.1	ssr0482	51.85	81	39	0	1	81	1	81	3e-22	85.9	[J] COG0228 Ribosomal protein S16
YP_740187.1	sll1326	71.26	501	144	0	1	501	1	501	0	741	[C] COG0056 F0F1-type ATP synthase, alpha subunit
YP_740188.1	all0007	32.69	156	105	0	22	177	29	184	1e-16	76.3	[C] COG0711 F0F1-type ATP synthase, subunit b
YP_740189.1	asl0009	94.92	59	3	0	22	80	22	80	4e-32	110	[C] COG0636 F0F1-type ATP synthase, subunit c/Archaeal/vacuolar-type H+-ATPase, subunit K
YP_740190.1	all0010	70.61	228	66	1	17	243	12	239	2e-101	300	[C] COG0356 F0F1-type ATP synthase, subunit a
YP_740191.1	all4792	53.54	226	105	0	8	233	4	229	3e-92	277	[J] COG0052 Ribosomal protein S2
YP_740192.1	sll1789	33.33	957	545	30	11	943	1	888	4e-124	422	[K] COG0086 DNA-directed RNA polymerase, beta' subunit/160 kD subunit
YP_740193.1	alr1595	46.32	665	300	9	10	670	12	623	0	561	[K] COG0086 DNA-directed RNA polymerase, beta' subunit/160 kD subunit
YP_740194.1	sll1787	47.46	1062	534	10	15	1062	3	1054	0	1002	[K] COG0085 DNA-directed RNA polymerase, beta subunit/140 kD subunit
YP_740200.1	slr0628	52	100	48	0	1	100	1	100	8e-30	106	[J] COG0199 Ribosomal protein S14
YP_740203.1	slr0823	61.31	168	65	0	1	168	1	168	2e-69	213	[R] COG0457 FOG: TPR repeat
YP_740204.1	slr0469	58.54	205	78	3	1	201	1	202	4e-79	240	[J] COG0522 Ribosomal protein S4 and related proteins
YP_740205.1	all3840	57.05	156	67	0	3	158	20	175	6e-64	198	[C] COG0852 NADH:ubiquinone oxidoreductase 27 kD subunit
YP_740206.2	all3841	68.56	194	61	0	1	194	16	209	6e-97	288	[C] COG0377 NADH:ubiquinone oxidoreductase 20 kD subunit and related Fe-S oxidoreductases
YP_740207.1	slr1279	63.33	120	44	0	1	120	1	120	2e-49	157	[C] COG0838 NADH:ubiquinone oxidoreductase subunit 3 (chain A)
YP_740208.1	slr1330	43.51	131	71	1	1	128	30	160	4e-35	123	[C] COG0355 F0F1-type ATP synthase, epsilon subunit (mitochondrial delta subunit)
YP_740209.1	all5039	81.04	480	91	0	12	491	2	481	0	797	[C] COG0055 F0F1-type ATP synthase, beta subunit
YP_740210.1	alr1524	83.09	473	79	1	4	476	5	476	0	823	[G] COG1850 Ribulose 1,5-bisphosphate carboxylase, large subunit
YP_740211.1	sll0336	56.65	263	111	3	224	485	32	292	3e-101	311	[I] COG0777 Acetyl-CoA carboxylase beta subunit
YP_740223.1	asl4452	58.46	65	26	1	1	65	1	64	3e-18	74.3	[J] COG0267 Ribosomal protein L33
YP_740224.1	asl4451	53.73	67	31	0	15	81	4	70	3e-19	78.2	[J] COG0238 Ribosomal protein S18
YP_740225.1	alr3428	56.86	102	42	1	1	102	1	100	1e-22	89.4	[J] COG0292 Ribosomal protein L20
YP_740226.1	sll1096	84.35	115	18	0	1	115	1	115	7e-67	202	[J] COG0048 Ribosomal protein S12
YP_740227.1	all4357	51.78	197	94	1	1	197	1	196	2e-73	225	[OU] COG0740 Protease subunit of ATP-dependent Clp proteases
YP_740232.1	alr3421	83.72	215	35	0	1	215	1	215	6e-135	383	[C] COG1290 Cytochrome b subunit of the bc complex
YP_740233.1	alr3422	80.77	156	30	0	3	158	5	160	1e-90	266	[C] COG1290 Cytochrome b subunit of the bc complex
YP_740234.1	all4191	36.28	328	184	5	13	336	4	310	4e-65	213	[K] COG0202 DNA-directed RNA polymerase, alpha subunit/40 kD subunit
YP_740235.1	all4192	56.56	122	53	0	17	138	10	131	1e-45	149	[J] COG0100 Ribosomal protein S11
YP_740236.1	asl4194	78.38	37	8	0	1	37	1	37	6e-15	63.9	[J] COG0257 Ribosomal protein L36
YP_740237.1	asl4195	62.16	74	27	1	1	73	1	74	1e-25	94	[J] COG0361 Translation initiation factor 1 (IF-1)
YP_740238.1	sll1809	51.94	129	62	0	4	132	5	133	4e-42	140	[J] COG0096 Ribosomal protein S8
YP_740239.1	all4205	70.49	122	36	0	1	122	1	122	1e-60	187	[J] COG0093 Ribosomal protein L14
YP_740240.1	sll1805	73.64	129	34	0	2	130	4	132	6e-68	206	[J] COG0197 Ribosomal protein L16/L10E
YP_740241.1	all4209	43.58	218	118	3	1	218	1	213	1e-47	161	[J] COG0092 Ribosomal protein S3
YP_740242.1	asl4211	63.04	92	34	0	1	92	1	92	6e-42	137	[J] COG0185 Ribosomal protein S19
YP_740243.1	sll1802	54.55	275	121	2	1	272	1	274	4e-103	306	[J] COG0090 Ribosomal protein L2
YP_740244.1	sll1801	39.29	84	51	0	2	85	12	95	5e-15	67.8	[J] COG0089 Ribosomal protein L23
YP_740247.1	all4883	49.38	480	240	2	32	509	15	493	1e-153	454	[C] COG1007 NADH:ubiquinone oxidoreductase subunit 2 (chain N)
YP_740248.1	all4339	56.13	155	68	0	1	155	1	155	2e-60	189	[J] COG0049 Ribosomal protein S7
YP_740249.1	slr0844	45.23	734	346	9	1	734	1	678	0	581	[CP] COG1009 NADH:ubiquinone oxidoreductase subunit 5 (chain L)/Multisubunit Na+/H+ antiporter, MnhA subunit
YP_740250.1	asl3674	56.86	51	20	1	1	51	1	49	3e-07	45.1	[J] COG0333 Ribosomal protein L32
YP_740251.1	all0936	41.53	354	165	3	1	316	1	350	2e-83	261	[O] COG0755 ABC-type transport system involved in cytochrome c biogenesis, permease component
YP_740252.1	alr3957	55.9	483	211	2	4	485	6	487	0	539	[C] COG1008 NADH:ubiquinone oxidoreductase subunit 4 (chain M)
YP_740253.1	asr3463	87.65	81	10	0	1	81	1	81	5e-49	154	[C] COG1145 Ferredoxin
YP_740254.1	sll0522	62.89	97	36	0	4	100	6	102	6e-23	89	[C] COG0713 NADH:ubiquinone oxidoreductase subunit 11 or 4L (chain K)
YP_740255.1	sll0521	42.94	177	91	4	1	176	1	168	1e-28	108	[C] COG0839 NADH:ubiquinone oxidoreductase subunit 6 (chain J)
YP_740256.1	alr0224	60.69	173	68	0	1	173	1	173	1e-77	235	[C] COG1143 Formate hydrogenlyase subunit 6/NADH:ubiquinone oxidoreductase 23 kD subunit (chain I)
YP_740257.1	sll0519	57.62	361	147	2	3	360	7	364	9e-149	430	[C] COG1005 NADH:ubiquinone oxidoreductase subunit 1 (chain H)
YP_740258.1	alr3355	70.56	394	115	1	1	393	1	394	0	612	[C] COG0649 NADH:ubiquinone oxidoreductase 49 kD subunit 7
YP_740259.1	asl0749	48.53	68	35	0	18	85	21	88	3e-16	70.5	[J] COG0184 Ribosomal protein S15P/S13E
YP_740261.1	all4339	56.13	155	68	0	1	155	1	155	2e-60	189	[J] COG0049 Ribosomal protein S7
YP_740262.1	all4883	49.38	480	240	2	32	509	15	493	1e-153	454	[C] COG1007 NADH:ubiquinone oxidoreductase subunit 2 (chain N)
YP_740265.1	sll1801	39.29	84	51	0	2	85	12	95	5e-15	67.8	[J] COG0089 Ribosomal protein L23
YP_740266.1	sll1802	54.74	274	119	3	2	272	3	274	8e-101	301	[J] COG0090 Ribosomal protein L2
YP_009261459.1	sll1096	82.11	123	22	0	1	123	1	123	2e-69	209	[J] COG0048 Ribosomal protein S12
YP_009261462.1	ssr0482	51.85	81	39	0	1	81	1	81	3e-22	85.9	[J] COG0228 Ribosomal protein S16
YP_009261465.1	sll1326	71.26	501	144	0	1	501	1	501	0	741	[C] COG0056 F0F1-type ATP synthase, alpha subunit
YP_009261466.1	all0007	32.69	156	105	0	22	177	29	184	2e-16	75.9	[C] COG0711 F0F1-type ATP synthase, subunit b
YP_009261467.1	asl0009	94.92	59	3	0	22	80	22	80	4e-32	110	[C] COG0636 F0F1-type ATP synthase, subunit c/Archaeal/vacuolar-type H+-ATPase, subunit K
YP_009261468.1	all0010	70.61	228	66	1	17	243	12	239	2e-101	300	[C] COG0356 F0F1-type ATP synthase, subunit a
YP_009261469.1	all4792	53.54	226	105	0	8	233	4	229	1e-92	278	[J] COG0052 Ribosomal protein S2
YP_009261470.1	sll1789	32.84	953	555	28	11	943	1	888	5e-124	422	[K] COG0086 DNA-directed RNA polymerase, beta' subunit/160 kD subunit
YP_009261471.1	alr1595	46.32	665	300	9	10	670	12	623	0	563	[K] COG0086 DNA-directed RNA polymerase, beta' subunit/160 kD subunit
YP_009261472.1	sll1787	47.46	1062	534	10	6	1053	3	1054	0	1002	[K] COG0085 DNA-directed RNA polymerase, beta subunit/140 kD subunit
YP_009261478.1	slr0628	52	100	48	0	1	100	1	100	8e-30	106	[J] COG0199 Ribosomal protein S14
YP_009261481.1	slr0823	61.31	168	65	0	1	168	1	168	2e-69	213	[R] COG0457 FOG: TPR repeat
YP_009261482.1	slr0469	58.54	205	78	3	1	201	1	202	4e-79	240	[J] COG0522 Ribosomal protein S4 and related proteins
YP_009261483.1	all3840	57.05	156	67	0	3	158	20	175	6e-64	198	[C] COG0852 NADH:ubiquinone oxidoreductase 27 kD subunit
YP_009261484.1	all3841	68.02	197	63	0	58	254	13	209	1e-96	290	[C] COG0377 NADH:ubiquinone oxidoreductase 20 kD subunit and related Fe-S oxidoreductases
YP_009261485.1	slr1279	63.33	120	44	0	1	120	1	120	2e-49	157	[C] COG0838 NADH:ubiquinone oxidoreductase subunit 3 (chain A)
YP_009261486.1	slr1330	42.75	131	72	1	1	128	30	160	6e-35	122	[C] COG0355 F0F1-type ATP synthase, epsilon subunit (mitochondrial delta subunit)
YP_009261487.1	all5039	80.83	480	92	0	12	491	2	481	0	795	[C] COG0055 F0F1-type ATP synthase, beta subunit
YP_009261488.1	alr1524	83.09	473	79	1	4	476	5	476	0	822	[G] COG1850 Ribulose 1,5-bisphosphate carboxylase, large subunit
YP_009261489.1	sll0336	56.65	263	111	3	224	485	32	292	3e-101	311	[I] COG0777 Acetyl-CoA carboxylase beta subunit
YP_009261501.1	asl4452	60	65	25	1	1	65	1	64	4e-19	76.6	[J] COG0267 Ribosomal protein L33
YP_009261502.1	asl4451	53.73	67	31	0	15	81	4	70	3e-19	78.2	[J] COG0238 Ribosomal protein S18
YP_009261503.1	BH3138	42.11	114	64	1	1	114	1	112	5e-23	90.1	[J] COG0292 Ribosomal protein L20
YP_009261504.1	sll1096	82.11	123	22	0	1	123	1	123	2e-69	209	[J] COG0048 Ribosomal protein S12
YP_009261505.1	all4357	52.04	196	92	2	1	195	1	195	6e-71	219	[OU] COG0740 Protease subunit of ATP-dependent Clp proteases
YP_009261510.1	alr3421	83.72	215	35	0	1	215	1	215	6e-135	383	[C] COG1290 Cytochrome b subunit of the bc complex
YP_009261511.1	alr3422	80.77	156	30	0	7	162	5	160	1e-90	266	[C] COG1290 Cytochrome b subunit of the bc complex
YP_009261512.1	all4191	36.59	328	183	5	13	336	4	310	3e-67	218	[K] COG0202 DNA-directed RNA polymerase, alpha subunit/40 kD subunit
YP_009261513.1	all4192	56.56	122	53	0	17	138	10	131	1e-45	149	[J] COG0100 Ribosomal protein S11
YP_009261514.1	asl4194	78.38	37	8	0	1	37	1	37	6e-15	63.9	[J] COG0257 Ribosomal protein L36
YP_009261515.1	asl4195	62.16	74	27	1	1	73	1	74	1e-25	94	[J] COG0361 Translation initiation factor 1 (IF-1)
YP_009261516.1	sll1809	52.71	129	61	0	4	132	5	133	2e-42	140	[J] COG0096 Ribosomal protein S8
YP_009261517.1	all4205	69.67	122	37	0	1	122	1	122	5e-60	185	[J] COG0093 Ribosomal protein L14
YP_009261518.1	sll1805	74.24	132	34	0	1	132	1	132	3e-70	212	[J] COG0197 Ribosomal protein L16/L10E
YP_009261519.1	sll1804	43.58	218	113	4	1	218	1	208	5e-48	162	[J] COG0092 Ribosomal protein S3
YP_009261520.1	asl4211	66.3	92	31	0	1	92	1	92	1e-43	141	[J] COG0185 Ribosomal protein S19
YP_009261521.1	sll1802	54.98	271	117	3	4	271	6	274	9e-101	300	[J] COG0090 Ribosomal protein L2
YP_009261522.1	sll1801	39.29	84	51	0	2	85	12	95	5e-15	67.8	[J] COG0089 Ribosomal protein L23
YP_009261525.1	all4883	49.38	480	240	2	32	509	15	493	1e-153	454	[C] COG1007 NADH:ubiquinone oxidoreductase subunit 2 (chain N)
YP_009261526.1	all4339	55.48	155	69	0	1	155	1	155	2e-59	186	[J] COG0049 Ribosomal protein S7
YP_009261527.1	slr0844	44.96	734	348	9	1	734	1	678	0	575	[CP] COG1009 NADH:ubiquinone oxidoreductase subunit 5 (chain L)/Multisubunit Na+/H+ antiporter, MnhA subunit
YP_009261528.1	asl3674	56.86	51	20	1	1	51	1	49	3e-07	45.1	[J] COG0333 Ribosomal protein L32
YP_009261529.1	all0936	41.24	354	166	3	1	316	1	350	3e-82	258	[O] COG0755 ABC-type transport system involved in cytochrome c biogenesis, permease component
YP_009261530.1	alr3957	55.9	483	211	2	3	484	6	487	0	542	[C] COG1008 NADH:ubiquinone oxidoreductase subunit 4 (chain M)
YP_009261531.1	asr3463	87.65	81	10	0	1	81	1	81	5e-49	154	[C] COG1145 Ferredoxin
YP_009261532.1	sll0522	62.89	97	36	0	4	100	6	102	6e-23	89	[C] COG0713 NADH:ubiquinone oxidoreductase subunit 11 or 4L (chain K)
YP_009261533.1	sll0521	41.48	176	95	2	1	176	1	168	1e-28	108	[C] COG0839 NADH:ubiquinone oxidoreductase subunit 6 (chain J)
YP_009261534.1	alr0224	60.69	173	68	0	1	173	1	173	2e-77	234	[C] COG1143 Formate hydrogenlyase subunit 6/NADH:ubiquinone oxidoreductase 23 kD subunit (chain I)
YP_009261535.1	sll0519	57.62	361	147	2	3	360	7	364	9e-149	430	[C] COG1005 NADH:ubiquinone oxidoreductase subunit 1 (chain H)
YP_009261536.1	alr3355	71.07	394	113	1	1	393	1	394	0	613	[C] COG0649 NADH:ubiquinone oxidoreductase 49 kD subunit 7
YP_009261537.1	asl0749	48.53	68	35	0	18	85	21	88	3e-16	70.5	[J] COG0184 Ribosomal protein S15P/S13E
YP_009261539.1	all4339	55.48	155	69	0	1	155	1	155	2e-59	186	[J] COG0049 Ribosomal protein S7
YP_009261540.1	all4883	49.38	480	240	2	32	509	15	493	1e-153	454	[C] COG1007 NADH:ubiquinone oxidoreductase subunit 2 (chain N)
YP_009261543.1	sll1801	39.29	84	51	0	2	85	12	95	5e-15	67.8	[J] COG0089 Ribosomal protein L23
YP_009261544.1	sll1802	54.98	271	117	3	4	271	6	274	9e-101	300	[J] COG0090 Ribosomal protein L2
Cchin_cp-64-mRNA-1	ssr0482	51.52	66	32	0	6	71	17	82	4e-17	72	[J] COG0228 Ribosomal protein S16
Cchin_cp-34-mRNA-1	sll1326	72.06	501	140	0	1	501	1	501	0	752	[C] COG0056 F0F1-type ATP synthase, alpha subunit
Cchin_cp-8-mRNA-1	sll1324	26.32	171	125	1	8	178	8	177	2e-15	72.8	[C] COG0711 F0F1-type ATP synthase, subunit b
Cchin_cp-87-mRNA-1	asl0009	94.92	59	3	0	22	80	22	80	4e-32	110	[C] COG0636 F0F1-type ATP synthase, subunit c/Archaeal/vacuolar-type H+-ATPase, subunit K
Cchin_cp-21-mRNA-1	all0010	71.05	228	65	1	17	243	12	239	2e-102	303	[C] COG0356 F0F1-type ATP synthase, subunit a
Cchin_cp-20-mRNA-1	all4792	53.6	222	103	0	8	229	4	225	4e-89	269	[J] COG0052 Ribosomal protein S2
Cchin_cp-32-mRNA-1	sll1789	34.52	843	483	19	7	838	1	785	5e-124	422	[K] COG0086 DNA-directed RNA polymerase, beta' subunit/160 kD subunit
Cchin_cp-62-mRNA-1	alr1595	46.23	664	302	10	10	670	12	623	0	571	[K] COG0086 DNA-directed RNA polymerase, beta' subunit/160 kD subunit
Cchin_cp-9-mRNA-1	alr1594	47.66	1070	520	10	12	1053	27	1084	0	999	[K] COG0085 DNA-directed RNA polymerase, beta subunit/140 kD subunit
Cchin_cp-30-mRNA-1	slr0628	53	100	47	0	1	100	1	100	3e-30	107	[J] COG0199 Ribosomal protein S14
Cchin_cp-46-mRNA-1	slr0823	61.54	169	64	1	1	169	1	168	2e-69	213	[R] COG0457 FOG: TPR repeat
Cchin_cp-60-mRNA-1	slr0469	57.56	205	80	3	1	201	1	202	8e-77	234	[J] COG0522 Ribosomal protein S4 and related proteins
Cchin_cp-26-mRNA-1	all3840	55.77	156	69	0	3	158	20	175	2e-62	194	[C] COG0852 NADH:ubiquinone oxidoreductase 27 kD subunit
Cchin_cp-54-mRNA-1	slr1280	70.74	188	54	1	15	201	34	221	4e-96	286	[C] COG0377 NADH:ubiquinone oxidoreductase 20 kD subunit and related Fe-S oxidoreductases
Cchin_cp-59-mRNA-1	slr1279	62.5	120	45	0	1	120	1	120	2e-49	158	[C] COG0838 NADH:ubiquinone oxidoreductase subunit 3 (chain A)
Cchin_cp-2-mRNA-1	slr1330	45.04	131	69	1	1	128	30	160	2e-36	126	[C] COG0355 F0F1-type ATP synthase, epsilon subunit (mitochondrial delta subunit)
Cchin_cp-58-mRNA-1	all5039	81.51	476	88	0	12	487	2	477	0	797	[C] COG0055 F0F1-type ATP synthase, beta subunit
Cchin_cp-24-mRNA-1	alr1524	85.38	472	69	0	4	475	5	476	0	847	[G] COG1850 Ribulose 1,5-bisphosphate carboxylase, large subunit
Cchin_cp-13-mRNA-1	sll0336	56.92	260	110	2	217	476	32	289	2e-99	306	[I] COG0777 Acetyl-CoA carboxylase beta subunit
Cchin_cp-39-mRNA-1	asl4452	58.46	65	26	1	1	65	1	64	9e-18	73.2	[J] COG0267 Ribosomal protein L33
Cchin_cp-43-mRNA-1	asl4451	55.22	67	30	0	15	81	4	70	1e-19	79.3	[J] COG0238 Ribosomal protein S18
Cchin_cp-19-mRNA-1	alr3428	58.82	102	40	1	1	102	1	100	1e-22	89	[J] COG0292 Ribosomal protein L20
Cchin_cp-6-mRNA-1	sll1096	68.42	38	12	0	1	38	1	38	1e-11	57.4	[J] COG0048 Ribosomal protein S12
Cchin_cp-7-mRNA-1	all4357	53.54	198	90	2	1	198	1	196	9e-71	218	[OU] COG0740 Protease subunit of ATP-dependent Clp proteases
Cchin_cp-61-mRNA-1	alr3422	82.05	156	28	0	19	174	5	160	4e-91	268	[C] COG1290 Cytochrome b subunit of the bc complex
Cchin_cp-3-mRNA-1	all4191	34.05	326	190	4	13	334	4	308	9e-62	204	[K] COG0202 DNA-directed RNA polymerase, alpha subunit/40 kD subunit
Cchin_cp-92-mRNA-1	sll1817	56.45	124	54	0	15	138	7	130	1e-46	152	[J] COG0100 Ribosomal protein S11
Cchin_cp-83-mRNA-1	asl4194	78.38	37	8	0	1	37	1	37	1e-14	63.2	[J] COG0257 Ribosomal protein L36
Cchin_cp-77-mRNA-1	asl4195	55.41	74	32	1	1	73	1	74	3e-21	82.8	[J] COG0361 Translation initiation factor 1 (IF-1)
Cchin_cp-74-mRNA-1	all4202	50.39	129	64	0	4	132	5	133	2e-42	141	[J] COG0096 Ribosomal protein S8
Cchin_cp-17-mRNA-1	all4205	68.85	122	38	0	1	122	1	122	9e-60	184	[J] COG0093 Ribosomal protein L14
Cchin_cp-56-mRNA-1	sll1805	72.31	130	36	0	1	130	3	132	7e-68	206	[J] COG0197 Ribosomal protein L16/L10E
Cchin_cp-65-mRNA-1	all4209	44.7	217	116	2	1	217	1	213	2e-53	176	[J] COG0092 Ribosomal protein S3
Cchin_cp-29-mRNA-1	sll1803	49.17	120	61	0	1	120	1	120	6e-38	131	[J] COG0091 Ribosomal protein L22
Cchin_cp-66-mRNA-1	asl4211	65.91	88	30	0	3	90	3	90	5e-41	134	[J] COG0185 Ribosomal protein S19
Cchin_cp-63-mRNA-1	sll1802	54.17	288	115	3	2	286	3	276	2e-102	305	[J] COG0090 Ribosomal protein L2
Cchin_cp-79-mRNA-1	sll1801	36.9	84	53	0	2	85	12	95	3e-14	65.5	[J] COG0089 Ribosomal protein L23
Cchin_cp-41-mRNA-1	all4883	46.97	511	237	3	32	540	15	493	5e-150	446	[C] COG1007 NADH:ubiquinone oxidoreductase subunit 2 (chain N)
Cchin_cp-22-mRNA-1	all4339	56.13	155	68	0	1	155	1	155	8e-61	189	[J] COG0049 Ribosomal protein S7
Cchin_cp-42-mRNA-1	sll1096	93.51	77	5	0	23	99	39	115	2e-47	152	[J] COG0048 Ribosomal protein S12
Cchin_cp-76-mRNA-1	slr0844	56.14	472	200	1	1	472	1	465	6e-177	519	[CP] COG1009 NADH:ubiquinone oxidoreductase subunit 5 (chain L)/Multisubunit Na+/H+ antiporter, MnhA subunit
Cchin_cp-10-mRNA-1	asl3674	55.81	43	19	0	1	43	1	43	1e-07	45.8	[J] COG0333 Ribosomal protein L32
Cchin_cp-18-mRNA-1	all0936	41.93	353	167	4	1	318	1	350	2e-81	256	[O] COG0755 ABC-type transport system involved in cytochrome c biogenesis, permease component
Cchin_cp-82-mRNA-1	alr3957	55.58	484	213	2	2	484	5	487	0	553	[C] COG1008 NADH:ubiquinone oxidoreductase subunit 4 (chain M)
Cchin_cp-33-mRNA-1	asr3463	88.89	81	9	0	1	81	1	81	7e-50	156	[C] COG1145 Ferredoxin
Cchin_cp-37-mRNA-1	sll0522	58	100	42	0	1	100	3	102	2e-23	90.1	[C] COG0713 NADH:ubiquinone oxidoreductase subunit 11 or 4L (chain K)
Cchin_cp-23-mRNA-1	sll0521	39.2	176	99	2	1	176	1	168	1e-28	108	[C] COG0839 NADH:ubiquinone oxidoreductase subunit 6 (chain J)
Cchin_cp-40-mRNA-1	alr0224	61.27	173	67	0	1	173	1	173	8e-79	238	[C] COG1143 Formate hydrogenlyase subunit 6/NADH:ubiquinone oxidoreductase 23 kD subunit (chain I)
Cchin_cp-75-mRNA-1	sll0519	56.63	362	150	3	3	361	7	364	4e-145	421	[C] COG1005 NADH:ubiquinone oxidoreductase subunit 1 (chain H)
Cchin_cp-4-mRNA-1	alr3355	72.24	389	107	1	6	393	6	394	0	618	[C] COG0649 NADH:ubiquinone oxidoreductase 49 kD subunit 7
Cchin_cp-51-mRNA-1	FN1979	50	70	35	0	13	82	15	84	2e-16	70.9	[J] COG0184 Ribosomal protein S15P/S13E
Cchin_cp-86-mRNA-1	sll1096	93.51	77	5	0	23	99	39	115	2e-47	152	[J] COG0048 Ribosomal protein S12
Cchin_cp-90-mRNA-1	all4339	56.13	155	68	0	1	155	1	155	8e-61	189	[J] COG0049 Ribosomal protein S7
Cchin_cp-36-mRNA-1	all4883	47.06	510	237	3	32	539	15	493	3e-150	446	[C] COG1007 NADH:ubiquinone oxidoreductase subunit 2 (chain N)
Cchin_cp-15-mRNA-1	sll1801	36.9	84	53	0	2	85	12	95	3e-14	65.5	[J] COG0089 Ribosomal protein L23
Cchin_cp-89-mRNA-1	sll1802	54.01	287	116	3	2	285	3	276	4e-102	305	[J] COG0090 Ribosomal protein L2
Cchin_cp-48-mRNA-1	asl4211	63.89	36	13	0	1	36	1	36	6e-09	49.3	[J] COG0185 Ribosomal protein S19

## Sheet: Table S8
Table S8.The COG (Clusters of Orthologous Groups) classification and distribution of genes in different species
#Species	C	G	I	J	K	O	R
Epimedium pseudowushanense	21	1	1	23	4	2	1
Epimedium lishihchenii	21	1	1	23	4	2	1
Epimedium sagittatum	20	1	1	24	4	2	1
Epimedium dolichostemon	21	1	1	23	4	2	1
Epimedium acuminatum	21	1	1	25	4	2	1
Epimedium koreanum	21	1	1	22	4	2	1
Sinopodophyllum hexandrum	20	1	1	23	4	2	1
Nandina domestica	21	1	1	26	4	2	1
Gymnospermium microrrhynchum	21	1	0	26	4	2	1
Berberis amurensis	23	1	0	34	3	2	1
Berberis koreana	23	1	0	33	3	2	1
Berberis bealei	24	1	1	36	3	2	1
Ranunculus macranthus	21	1	1	25	4	2	1
Clematis terniflora	20	1	1	29	4	2	1
Aconitum chiisanense	21	1	1	24	4	2	1
Thalictrum coreanum	21	1	1	24	4	2	1
Megaleranthis saniculifolia	21	1	1	26	4	4	1
Coptis chinensis	20	1	1	28	4	2	1
Stephania japonica	20	1	1	25	4	2	1
Akebia trifoliata	20	1	1	26	4	2	1
Papaver somniferum	20	1	1	25	4	2	1
Euptelea pleiosperma	20	1	1	26	4	2	1
Liriodendron chinense	21	1	1	25	4	2	1
Liriodendron tulipifera	21	1	1	25	4	2	1
J,Translation, ribosomal structure and biogenesis;
K, Transcription;
O, Posttranslational modification, protein turnover, chaperones;
C, Energy production and conversion;
G, Carbohydrate transport and metabolism;
I, Lipid transport and metabolism;
R, General function prediction only.

## Sheet: Table S9
Table S9, LRT analysis of 42 genes in all 24 chloroplast genomes.
Gene	p_value	LR_value	lnL1	lnL2
ndhG	0.008041	5.79	-2299.36	-2296.46
psaI	0.206635	0.67	-427.33	-427
ndhJ	0.357938	0.13	-1612.82	-1612.76
matK	0.358769	0.13	-6107.93	-6107.86
rpoC2	0.498129	0	-18174.8	-18174.8
ndhH	0.499436	0	-4629.9	-4629.9
petL	0.499436	0	-341.13	-341.13
petN	0.499436	0	-162.24	-162.24
atpA	0.5	0	-5735.66	-5735.66
atpB	0.5	0	-5037.81	-5037.81
atpE	0.5	0	-1647.1	-1647.1
atpF	0.5	0	-733.93	-733.93
atpI	0.5	0	-2507.13	-2507.13
cemA	0.5	0	-3146.74	-3146.74
ndhA	0.5	0	-4567.95	-4567.95
ndhC	0.5	0	-1217.79	-1217.79
ndhD	0.5	0	-7096.9	-7096.9
ndhE	0.5	0	-1208.29	-1208.29
ndhI	0.5	0	-1899.44	-1899.44
petG	0.5	0	-324.39	-324.39
psaA	0.5	0	-6613.7	-6613.7
psaB	0.5	0	-6461.93	-6461.93
psaC	0.5	-0.75	-712.2	-712.58
psaJ	0.5	0	-477.45	-477.45
psbA	0.5	0	-2933.82	-2933.82
psbC	0.5	0	-4280.2	-4280.2
psbD	0.5	0	-2821.82	-2821.82
psbE	0.5	0	-705.82	-705.82
psbF	0.5	0	-284.21	-284.21
psbJ	0.5	0	-424.33	-424.33
psbK	0.5	0	-465.15	-465.15
psbL	0.5	0	-255.61	-255.61
rbcL	0.5	0	-4844.39	-4844.39
rpl20	0.5	0	-448.68	-448.68
rpl33	0.5	0	-829.2	-829.2
rpoB	0.5	0	-11735.3	-11735.3
rpoC1	0.5	0	-7362.04	-7362.04
rps15	0.5	0	-352.41	-352.41
rps18	0.5	0	-990.26	-990.26
rps2	0.5	0	-2724.35	-2724.35
ycf3	0.5	-0.15	-1400.17	-1400.25
ycf4	0.5	-0.04	-2194.54	-2194.56

## Sheet: Table S10
Table S10: SSRs detected in goldthread and other species.
ID	SSR nr.	SSR type	SSR	size	start	end	FORWARD PRIMER1 (5'-3')	Tm(°C)	size	REVERSE PRIMER1 (5'-3')	Tm(°C)	size	PRODUCT1 size (bp)	start (bp)	end (bp)	FORWARD PRIMER2 (5'-3')	Tm(°C)	size	REVERSE PRIMER2 (5'-3')	Tm(°C)	size	PRODUCT2 size (bp)	start (bp)	end (bp)	FORWARD PRIMER3 (5'-3')	Tm(°C)	size	REVERSE PRIMER3 (5'-3')	Tm(°C)	size	PRODUCT3 size (bp)	start (bp)	end (bp)
NC_030504.1	1	c	(A)14gaaaacaattttgaggaacgtacagaaattacagtacagatcggcacagaac(A)11	77	239	315	CTATGGTCGGTCTGTGACCC	60.004	20	CTTCAACCCTTTGAGCGAAA	60.003	20	133	139417	139549	GGGTCTATGGTCGGTCTGTG	60.004	20	CTTCAACCCTTTGAGCGAAA	60.003	20	137	139413	139549	CTTCAACCCTTTGAGCGAAA	60.003	20	CTATGGTCGGTCTGTGACCC	60.004	20	133	107645	107777
NC_030504.1	2	p1	(A)14	14	4427	4440	CTATGGTCGGTCTGTGACCC	60.004	20	CTTCAACCCTTTGAGCGAAA	60.003	20	133	139417	139549	GGGTCTATGGTCGGTCTGTG	60.004	20	CTTCAACCCTTTGAGCGAAA	60.003	20	137	139413	139549	CTTCAACCCTTTGAGCGAAA	60.003	20	CTATGGTCGGTCTGTGACCC	60.004	20	133	107645	107777
NC_030504.1	3	p1	(T)17	17	4616	4632	CTATGGTCGGTCTGTGACCC	60.004	20	CTTCAACCCTTTGAGCGAAA	60.003	20	133	139417	139549	GGGTCTATGGTCGGTCTGTG	60.004	20	CTTCAACCCTTTGAGCGAAA	60.003	20	137	139413	139549	CTTCAACCCTTTGAGCGAAA	60.003	20	CTATGGTCGGTCTGTGACCC	60.004	20	133	107645	107777
NC_030504.1	4	p1	(T)14	14	5426	5439	CTATGGTCGGTCTGTGACCC	60.004	20	CTTCAACCCTTTGAGCGAAA	60.003	20	133	139417	139549	GGGTCTATGGTCGGTCTGTG	60.004	20	CTTCAACCCTTTGAGCGAAA	60.003	20	137	139413	139549	CTTCAACCCTTTGAGCGAAA	60.003	20	CTATGGTCGGTCTGTGACCC	60.004	20	133	107645	107777
NC_030504.1	5	p1	(C)17	17	7213	7229	CTATGGTCGGTCTGTGACCC	60.004	20	CTTCAACCCTTTGAGCGAAA	60.003	20	133	139417	139549	GGGTCTATGGTCGGTCTGTG	60.004	20	CTTCAACCCTTTGAGCGAAA	60.003	20	137	139413	139549	CTTCAACCCTTTGAGCGAAA	60.003	20	CTATGGTCGGTCTGTGACCC	60.004	20	133	107645	107777
NC_030504.1	6	p1	(T)14	14	7812	7825	CTATGGTCGGTCTGTGACCC	60.004	20	CTTCAACCCTTTGAGCGAAA	60.003	20	133	139417	139549	GGGTCTATGGTCGGTCTGTG	60.004	20	CTTCAACCCTTTGAGCGAAA	60.003	20	137	139413	139549	CTTCAACCCTTTGAGCGAAA	60.003	20	CTATGGTCGGTCTGTGACCC	60.004	20	133	107645	107777
NC_030504.1	7	p1	(A)11	11	9792	9802	CTATGGTCGGTCTGTGACCC	60.004	20	CTTCAACCCTTTGAGCGAAA	60.003	20	133	139417	139549	GGGTCTATGGTCGGTCTGTG	60.004	20	CTTCAACCCTTTGAGCGAAA	60.003	20	137	139413	139549	CTTCAACCCTTTGAGCGAAA	60.003	20	CTATGGTCGGTCTGTGACCC	60.004	20	133	107645	107777
NC_030504.1	8	c	(T)11aagttggatcaacccttccaattgaatgagtataagtaaaggatccatggatgaagatagaaaagtgtatttctaatcgtaactagatcttcca(T)14	119	10304	10422	CTATGGTCGGTCTGTGACCC	60.004	20	CTTCAACCCTTTGAGCGAAA	60.003	20	133	139417	139549	GGGTCTATGGTCGGTCTGTG	60.004	20	CTTCAACCCTTTGAGCGAAA	60.003	20	137	139413	139549	CTTCAACCCTTTGAGCGAAA	60.003	20	CTATGGTCGGTCTGTGACCC	60.004	20	133	107645	107777
NC_030504.1	9	p1	(T)12	12	10736	10747	CTATGGTCGGTCTGTGACCC	60.004	20	CTTCAACCCTTTGAGCGAAA	60.003	20	133	139417	139549	GGGTCTATGGTCGGTCTGTG	60.004	20	CTTCAACCCTTTGAGCGAAA	60.003	20	137	139413	139549	CTTCAACCCTTTGAGCGAAA	60.003	20	CTATGGTCGGTCTGTGACCC	60.004	20	133	107645	107777
NC_030504.1	10	c	(T)14attattgatttc(T)14	40	14165	14204	CTATGGTCGGTCTGTGACCC	60.004	20	CTTCAACCCTTTGAGCGAAA	60.003	20	133	139417	139549	GGGTCTATGGTCGGTCTGTG	60.004	20	CTTCAACCCTTTGAGCGAAA	60.003	20	137	139413	139549	CTTCAACCCTTTGAGCGAAA	60.003	20	CTATGGTCGGTCTGTGACCC	60.004	20	133	107645	107777
NC_030504.1	11	c	(T)10g(A)10	21	15884	15904	CTATGGTCGGTCTGTGACCC	60.004	20	CTTCAACCCTTTGAGCGAAA	60.003	20	133	139417	139549	GGGTCTATGGTCGGTCTGTG	60.004	20	CTTCAACCCTTTGAGCGAAA	60.003	20	137	139413	139549	CTTCAACCCTTTGAGCGAAA	60.003	20	CTATGGTCGGTCTGTGACCC	60.004	20	133	107645	107777
NC_030504.1	12	p1	(T)22	22	17618	17639	CTATGGTCGGTCTGTGACCC	60.004	20	CTTCAACCCTTTGAGCGAAA	60.003	20	133	139417	139549	GGGTCTATGGTCGGTCTGTG	60.004	20	CTTCAACCCTTTGAGCGAAA	60.003	20	137	139413	139549	CTTCAACCCTTTGAGCGAAA	60.003	20	CTATGGTCGGTCTGTGACCC	60.004	20	133	107645	107777
NC_030504.1	13	p1	(T)12	12	19832	19843	CTATGGTCGGTCTGTGACCC	60.004	20	CTTCAACCCTTTGAGCGAAA	60.003	20	133	139417	139549	GGGTCTATGGTCGGTCTGTG	60.004	20	CTTCAACCCTTTGAGCGAAA	60.003	20	137	139413	139549	CTTCAACCCTTTGAGCGAAA	60.003	20	CTATGGTCGGTCTGTGACCC	60.004	20	133	107645	107777
NC_030504.1	14	p1	(T)10	10	27498	27507	CTATGGTCGGTCTGTGACCC	60.004	20	CTTCAACCCTTTGAGCGAAA	60.003	20	133	139417	139549	GGGTCTATGGTCGGTCTGTG	60.004	20	CTTCAACCCTTTGAGCGAAA	60.003	20	137	139413	139549	CTTCAACCCTTTGAGCGAAA	60.003	20	CTATGGTCGGTCTGTGACCC	60.004	20	133	107645	107777
NC_030504.1	15	p1	(A)13	13	29256	29268	CTATGGTCGGTCTGTGACCC	60.004	20	CTTCAACCCTTTGAGCGAAA	60.003	20	133	139417	139549	GGGTCTATGGTCGGTCTGTG	60.004	20	CTTCAACCCTTTGAGCGAAA	60.003	20	137	139413	139549	CTTCAACCCTTTGAGCGAAA	60.003	20	CTATGGTCGGTCTGTGACCC	60.004	20	133	107645	107777
NC_030504.1	16	p1	(T)12	12	33663	33674	CTATGGTCGGTCTGTGACCC	60.004	20	CTTCAACCCTTTGAGCGAAA	60.003	20	133	139417	139549	GGGTCTATGGTCGGTCTGTG	60.004	20	CTTCAACCCTTTGAGCGAAA	60.003	20	137	139413	139549	CTTCAACCCTTTGAGCGAAA	60.003	20	CTATGGTCGGTCTGTGACCC	60.004	20	133	107645	107777
NC_030504.1	17	p1	(T)10	10	34881	34890	CTATGGTCGGTCTGTGACCC	60.004	20	CTTCAACCCTTTGAGCGAAA	60.003	20	133	139417	139549	GGGTCTATGGTCGGTCTGTG	60.004	20	CTTCAACCCTTTGAGCGAAA	60.003	20	137	139413	139549	CTTCAACCCTTTGAGCGAAA	60.003	20	CTATGGTCGGTCTGTGACCC	60.004	20	133	107645	107777
NC_030504.1	18	p1	(A)11	11	38951	38961	CTATGGTCGGTCTGTGACCC	60.004	20	CTTCAACCCTTTGAGCGAAA	60.003	20	133	139417	139549	GGGTCTATGGTCGGTCTGTG	60.004	20	CTTCAACCCTTTGAGCGAAA	60.003	20	137	139413	139549	CTTCAACCCTTTGAGCGAAA	60.003	20	CTATGGTCGGTCTGTGACCC	60.004	20	133	107645	107777
NC_030504.1	19	p1	(C)10	10	39970	39979	CTATGGTCGGTCTGTGACCC	60.004	20	CTTCAACCCTTTGAGCGAAA	60.003	20	133	139417	139549	GGGTCTATGGTCGGTCTGTG	60.004	20	CTTCAACCCTTTGAGCGAAA	60.003	20	137	139413	139549	CTTCAACCCTTTGAGCGAAA	60.003	20	CTATGGTCGGTCTGTGACCC	60.004	20	133	107645	107777
NC_030504.1	20	p1	(T)10	10	45482	45491	CTATGGTCGGTCTGTGACCC	60.004	20	CTTCAACCCTTTGAGCGAAA	60.003	20	133	139417	139549	GGGTCTATGGTCGGTCTGTG	60.004	20	CTTCAACCCTTTGAGCGAAA	60.003	20	137	139413	139549	CTTCAACCCTTTGAGCGAAA	60.003	20	CTATGGTCGGTCTGTGACCC	60.004	20	133	107645	107777
NC_030504.1	21	p1	(A)14	14	47011	47024	CTATGGTCGGTCTGTGACCC	60.004	20	CTTCAACCCTTTGAGCGAAA	60.003	20	133	139417	139549	GGGTCTATGGTCGGTCTGTG	60.004	20	CTTCAACCCTTTGAGCGAAA	60.003	20	137	139413	139549	CTTCAACCCTTTGAGCGAAA	60.003	20	CTATGGTCGGTCTGTGACCC	60.004	20	133	107645	107777
NC_030504.1	22	p1	(T)10	10	48566	48575	CTATGGTCGGTCTGTGACCC	60.004	20	CTTCAACCCTTTGAGCGAAA	60.003	20	133	139417	139549	GGGTCTATGGTCGGTCTGTG	60.004	20	CTTCAACCCTTTGAGCGAAA	60.003	20	137	139413	139549	CTTCAACCCTTTGAGCGAAA	60.003	20	CTATGGTCGGTCTGTGACCC	60.004	20	133	107645	107777
NC_030504.1	23	p1	(T)11	11	51266	51276	CTATGGTCGGTCTGTGACCC	60.004	20	CTTCAACCCTTTGAGCGAAA	60.003	20	133	139417	139549	GGGTCTATGGTCGGTCTGTG	60.004	20	CTTCAACCCTTTGAGCGAAA	60.003	20	137	139413	139549	CTTCAACCCTTTGAGCGAAA	60.003	20	CTATGGTCGGTCTGTGACCC	60.004	20	133	107645	107777
NC_030504.1	24	p1	(T)11	11	54589	54599	CTATGGTCGGTCTGTGACCC	60.004	20	CTTCAACCCTTTGAGCGAAA	60.003	20	133	139417	139549	GGGTCTATGGTCGGTCTGTG	60.004	20	CTTCAACCCTTTGAGCGAAA	60.003	20	137	139413	139549	CTTCAACCCTTTGAGCGAAA	60.003	20	CTATGGTCGGTCTGTGACCC	60.004	20	133	107645	107777
NC_030504.1	25	p1	(T)10	10	55304	55313	CTATGGTCGGTCTGTGACCC	60.004	20	CTTCAACCCTTTGAGCGAAA	60.003	20	133	139417	139549	GGGTCTATGGTCGGTCTGTG	60.004	20	CTTCAACCCTTTGAGCGAAA	60.003	20	137	139413	139549	CTTCAACCCTTTGAGCGAAA	60.003	20	CTATGGTCGGTCTGTGACCC	60.004	20	133	107645	107777
NC_030504.1	26	p3	(ATA)6	18	57519	57536	CTATGGTCGGTCTGTGACCC	60.004	20	CTTCAACCCTTTGAGCGAAA	60.003		133	139417	139549	GGGTCTATGGTCGGTCTGTG	60.004	20	CTTCAACCCTTTGAGCGAAA	60.003	20	137	139413	139549	CTTCAACCCTTTGAGCGAAA	60.003	20	CTATGGTCGGTCTGTGACCC	60.004	20	133	107645	107777
NC_030504.1	27	p1	(A)10	10	58011	58020	CTATGGTCGGTCTGTGACCC	60.004	20	CTTCAACCCTTTGAGCGAAA	60.003	20	133	139417	139549	GGGTCTATGGTCGGTCTGTG	60.004	20	CTTCAACCCTTTGAGCGAAA	60.003	20	137	139413	139549	CTTCAACCCTTTGAGCGAAA	60.003	20	CTATGGTCGGTCTGTGACCC	60.004	20	133	107645	107777
NC_030504.1	28	p1	(T)11	11	64001	64011	CTATGGTCGGTCTGTGACCC	60.004	20	CTTCAACCCTTTGAGCGAAA	60.003	20	133	139417	139549	GGGTCTATGGTCGGTCTGTG	60.004	20	CTTCAACCCTTTGAGCGAAA	60.003	20	137	139413	139549	CTTCAACCCTTTGAGCGAAA	60.003	20	CTATGGTCGGTCTGTGACCC	60.004	20	133	107645	107777
NC_030504.1	29	p1	(A)10	10	64388	64397	CTATGGTCGGTCTGTGACCC	60.004	20	CTTCAACCCTTTGAGCGAAA	60.003	20	133	139417	139549	GGGTCTATGGTCGGTCTGTG	60.004	20	CTTCAACCCTTTGAGCGAAA	60.003	20	137	139413	139549	CTTCAACCCTTTGAGCGAAA	60.003	20	CTATGGTCGGTCTGTGACCC	60.004	20	133	107645	107777
NC_030504.1	30	p1	(A)11	11	66987	66997	CTATGGTCGGTCTGTGACCC	60.004	20	CTTCAACCCTTTGAGCGAAA	60.003	20	133	139417	139549	GGGTCTATGGTCGGTCTGTG	60.004	20	CTTCAACCCTTTGAGCGAAA	60.003	20	137	139413	139549	CTTCAACCCTTTGAGCGAAA	60.003	20	CTATGGTCGGTCTGTGACCC	60.004	20	133	107645	107777
NC_030504.1	31	p1	(T)11	11	69367	69377	CTATGGTCGGTCTGTGACCC	60.004	20	CTTCAACCCTTTGAGCGAAA	60.003	20	133	139417	139549	GGGTCTATGGTCGGTCTGTG	60.004	20	CTTCAACCCTTTGAGCGAAA	60.003	20	137	139413	139549	CTTCAACCCTTTGAGCGAAA	60.003	20	CTATGGTCGGTCTGTGACCC	60.004	20	133	107645	107777
NC_030504.1	32	p1	(T)10	10	70927	70936	CTATGGTCGGTCTGTGACCC	60.004	20	CTTCAACCCTTTGAGCGAAA	60.003	20	133	139417	139549	GGGTCTATGGTCGGTCTGTG	60.004	20	CTTCAACCCTTTGAGCGAAA	60.003	20	137	139413	139549	CTTCAACCCTTTGAGCGAAA	60.003	20	CTATGGTCGGTCTGTGACCC	60.004	20	133	107645	107777
NC_030504.1	33	p2	(TA)7	14	71524	71537	CTATGGTCGGTCTGTGACCC	60.004	20	CTTCAACCCTTTGAGCGAAA	60.003	20	133	139417	139549	GGGTCTATGGTCGGTCTGTG	60.004	20	CTTCAACCCTTTGAGCGAAA	60.003	20	137	139413	139549	CTTCAACCCTTTGAGCGAAA	60.003	20	CTATGGTCGGTCTGTGACCC	60.004	20	133	107645	107777
NC_030504.1	34	p1	(T)10	10	72057	72066	CTATGGTCGGTCTGTGACCC	60.004	20	CTTCAACCCTTTGAGCGAAA	60.003	20	133	139417	139549	GGGTCTATGGTCGGTCTGTG	60.004	20	CTTCAACCCTTTGAGCGAAA	60.003	20	137	139413	139549	CTTCAACCCTTTGAGCGAAA	60.003	20	CTATGGTCGGTCTGTGACCC	60.004	20	133	107645	107777
NC_030504.1	35	p1	(T)14	14	75152	75165	CTATGGTCGGTCTGTGACCC	60.004	20	CTTCAACCCTTTGAGCGAAA	60.003	20	133	139417	139549	GGGTCTATGGTCGGTCTGTG	60.004	20	CTTCAACCCTTTGAGCGAAA	60.003	20	137	139413	139549	CTTCAACCCTTTGAGCGAAA	60.003	20	CTATGGTCGGTCTGTGACCC	60.004	20	133	107645	107777
NC_030504.1	36	p1	(T)12	12	82519	82530	CTATGGTCGGTCTGTGACCC	60.004	20	CTTCAACCCTTTGAGCGAAA	60.003	20	133	139417	139549	GGGTCTATGGTCGGTCTGTG	60.004	20	CTTCAACCCTTTGAGCGAAA	60.003	20	137	139413	139549	CTTCAACCCTTTGAGCGAAA	60.003	20	CTATGGTCGGTCTGTGACCC	60.004	20	133	107645	107777
NC_030504.1	37	p1	(T)11	11	86078	86088	CTATGGTCGGTCTGTGACCC	60.004	20	CTTCAACCCTTTGAGCGAAA	60.003	20	133	139417	139549	GGGTCTATGGTCGGTCTGTG	60.004	20	CTTCAACCCTTTGAGCGAAA	60.003	20	137	139413	139549	CTTCAACCCTTTGAGCGAAA	60.003	20	CTATGGTCGGTCTGTGACCC	60.004	20	133	107645	107777
NC_030504.1	38	p1	(T)10	10	106685	106694	CTATGGTCGGTCTGTGACCC	60.004	20	CTTCAACCCTTTGAGCGAAA	60.003	20	133	139417	139549	GGGTCTATGGTCGGTCTGTG	60.004	20	CTTCAACCCTTTGAGCGAAA	60.003	20	137	139413	139549	CTTCAACCCTTTGAGCGAAA	60.003	20	CTATGGTCGGTCTGTGACCC	60.004	20	133	107645	107777
NC_030504.1	39	p1	(A)14	14	111692	111705	CTATGGTCGGTCTGTGACCC	60.004	20	CTTCAACCCTTTGAGCGAAA	60.003	20	133	139417	139549	GGGTCTATGGTCGGTCTGTG	60.004	20	CTTCAACCCTTTGAGCGAAA	60.003	20	137	139413	139549	CTTCAACCCTTTGAGCGAAA	60.003	20	CTATGGTCGGTCTGTGACCC	60.004	20	133	107645	107777
NC_030504.1	40	p1	(T)10	10	112092	112101	CTATGGTCGGTCTGTGACCC	60.004	20	CTTCAACCCTTTGAGCGAAA	60.003	20	133	139417	139549	GGGTCTATGGTCGGTCTGTG	60.004	20	CTTCAACCCTTTGAGCGAAA	60.003	20	137	139413	139549	CTTCAACCCTTTGAGCGAAA	60.003	20	CTATGGTCGGTCTGTGACCC	60.004	20	133	107645	107777
NC_030504.1	41	p1	(A)11	11	116595	116605	CTATGGTCGGTCTGTGACCC	60.004	20	CTTCAACCCTTTGAGCGAAA	60.003	20	133	139417	139549	GGGTCTATGGTCGGTCTGTG	60.004	20	CTTCAACCCTTTGAGCGAAA	60.003	20	137	139413	139549	CTTCAACCCTTTGAGCGAAA	60.003	20	CTATGGTCGGTCTGTGACCC	60.004	20	133	107645	107777
NC_030504.1	42	p2	(AT)8	16	118051	118066	CTATGGTCGGTCTGTGACCC	60.004	20	CTTCAACCCTTTGAGCGAAA	60.003	20	133	139417	139549	GGGTCTATGGTCGGTCTGTG	60.004	20	CTTCAACCCTTTGAGCGAAA	60.003	20	137	139413	139549	CTTCAACCCTTTGAGCGAAA	60.003	20	CTATGGTCGGTCTGTGACCC	60.004	20	133	107645	107777
NC_030504.1	43	p1	(T)13	13	122345	122357	CTATGGTCGGTCTGTGACCC	60.004	20	CTTCAACCCTTTGAGCGAAA	60.003	20	133	139417	139549	GGGTCTATGGTCGGTCTGTG	60.004	20	CTTCAACCCTTTGAGCGAAA	60.003	20	137	139413	139549	CTTCAACCCTTTGAGCGAAA	60.003	20	CTATGGTCGGTCTGTGACCC	60.004	20	133	107645	107777
NC_030504.1	44	p1	(T)10	10	123704	123713	CTATGGTCGGTCTGTGACCC	60.004	20	CTTCAACCCTTTGAGCGAAA	60.003	20	133	139417	139549	GGGTCTATGGTCGGTCTGTG	60.004	20	CTTCAACCCTTTGAGCGAAA	60.003	20	137	139413	139549	CTTCAACCCTTTGAGCGAAA	60.003	20	CTATGGTCGGTCTGTGACCC	60.004	20	133	107645	107777
NC_030504.1	45	p2	(AT)7	14	128670	128683	CTATGGTCGGTCTGTGACCC	60.004	20	CTTCAACCCTTTGAGCGAAA	60.003	20	133	139417	139549	GGGTCTATGGTCGGTCTGTG	60.004	20	CTTCAACCCTTTGAGCGAAA	60.003	20	137	139413	139549	CTTCAACCCTTTGAGCGAAA	60.003	20	CTATGGTCGGTCTGTGACCC	60.004	20	133	107645	107777
NC_030504.1	46	p1	(A)10	10	132041	132050	CTATGGTCGGTCTGTGACCC	60.004	20	CTTCAACCCTTTGAGCGAAA	60.003	20	133	139417	139549	GGGTCTATGGTCGGTCTGTG	60.004	20	CTTCAACCCTTTGAGCGAAA	60.003	20	137	139413	139549	CTTCAACCCTTTGAGCGAAA	60.003	20	CTATGGTCGGTCTGTGACCC	60.004	20	133	107645	107777
NC_030504.1	47	p1	(A)10	10	135095	135104	CTATGGTCGGTCTGTGACCC	60.004	20	CTTCAACCCTTTGAGCGAAA	60.003	20	133	139417	139549	GGGTCTATGGTCGGTCTGTG	60.004	20	CTTCAACCCTTTGAGCGAAA	60.003	20	137	139413	139549	CTTCAACCCTTTGAGCGAAA	60.003	20	CTATGGTCGGTCTGTGACCC	60.004	20	133	107645	107777
NC_030504.1	48	p1	(T)14	14	135491	135504	CTATGGTCGGTCTGTGACCC	60.004	20	CTTCAACCCTTTGAGCGAAA	60.003	20	133	139417	139549	GGGTCTATGGTCGGTCTGTG	60.004	20	CTTCAACCCTTTGAGCGAAA	60.003	20	137	139413	139549	CTTCAACCCTTTGAGCGAAA	60.003	20	CTATGGTCGGTCTGTGACCC	60.004	20	133	107645	107777
NC_030504.1	49	p1	(A)10	10	140502	140511	CTATGGTCGGTCTGTGACCC	60.004	20	CTTCAACCCTTTGAGCGAAA	60.003	20	133	139417	139549	GGGTCTATGGTCGGTCTGTG	60.004	20	CTTCAACCCTTTGAGCGAAA	60.003	20	137	139413	139549	CTTCAACCCTTTGAGCGAAA	60.003	20	CTATGGTCGGTCTGTGACCC	60.004	20	133	107645	107777
NC_008326.1	1	c	(A)10ttcctttatg(A)13gaaaacaattttgaggaacgtacagaaattacagtacagatcggcacagaac(A)11	96	225	320	CTATGGTCGGTCTGTGACCC	60.004	20	CTTCAACCCTTTGAGCGAAA	60.003	20	133	139859	139991	GGGTCTATGGTCGGTCTGTG	60.004	20	CTTCAACCCTTTGAGCGAAA	60.003	20	137	139855	139991	CTTCAACCCTTTGAGCGAAA	60.003	20	CTATGGTCGGTCTGTGACCC	60.004	20	133	108044	108176
NC_008326.1	2	p1	(A)10	10	1771	1780	CTATGGTCGGTCTGTGACCC	60.004	20	CTTCAACCCTTTGAGCGAAA	60.003	20	133	139859	139991	GGGTCTATGGTCGGTCTGTG	60.004	20	CTTCAACCCTTTGAGCGAAA	60.003	20	137	139855	139991	CTTCAACCCTTTGAGCGAAA	60.003	20	CTATGGTCGGTCTGTGACCC	60.004	20	133	108044	108176
NC_008326.1	3	p1	(A)10	10	3971	3980	CTATGGTCGGTCTGTGACCC	60.004	20	CTTCAACCCTTTGAGCGAAA	60.003	20	133	139859	139991	GGGTCTATGGTCGGTCTGTG	60.004	20	CTTCAACCCTTTGAGCGAAA	60.003	20	137	139855	139991	CTTCAACCCTTTGAGCGAAA	60.003	20	CTATGGTCGGTCTGTGACCC	60.004	20	133	108044	108176
NC_008326.1	4	p1	(A)16	16	4435	4450	CTATGGTCGGTCTGTGACCC	60.004	20	CTTCAACCCTTTGAGCGAAA	60.003	20	133	139859	139991	GGGTCTATGGTCGGTCTGTG	60.004	20	CTTCAACCCTTTGAGCGAAA	60.003	20	137	139855	139991	CTTCAACCCTTTGAGCGAAA	60.003	20	CTATGGTCGGTCTGTGACCC	60.004	20	133	108044	108176
NC_008326.1	5	p1	(T)13	13	4626	4638	CTATGGTCGGTCTGTGACCC	60.004	20	CTTCAACCCTTTGAGCGAAA	60.003	20	133	139859	139991	GGGTCTATGGTCGGTCTGTG	60.004	20	CTTCAACCCTTTGAGCGAAA	60.003	20	137	139855	139991	CTTCAACCCTTTGAGCGAAA	60.003	20	CTATGGTCGGTCTGTGACCC	60.004	20	133	108044	108176
NC_008326.1	6	p1	(C)14	14	7219	7232	CTATGGTCGGTCTGTGACCC	60.004	20	CTTCAACCCTTTGAGCGAAA	60.003	20	133	139859	139991	GGGTCTATGGTCGGTCTGTG	60.004	20	CTTCAACCCTTTGAGCGAAA	60.003	20	137	139855	139991	CTTCAACCCTTTGAGCGAAA	60.003	20	CTATGGTCGGTCTGTGACCC	60.004	20	133	108044	108176
NC_008326.1	7	p1	(T)11	11	7812	7822	CTATGGTCGGTCTGTGACCC	60.004	20	CTTCAACCCTTTGAGCGAAA	60.003	20	133	139859	139991	GGGTCTATGGTCGGTCTGTG	60.004	20	CTTCAACCCTTTGAGCGAAA	60.003	20	137	139855	139991	CTTCAACCCTTTGAGCGAAA	60.003	20	CTATGGTCGGTCTGTGACCC	60.004	20	133	108044	108176
NC_008326.1	8	p1	(T)11	11	10312	10322	CTATGGTCGGTCTGTGACCC	60.004	20	CTTCAACCCTTTGAGCGAAA	60.003	20	133	139859	139991	GGGTCTATGGTCGGTCTGTG	60.004	20	CTTCAACCCTTTGAGCGAAA	60.003	20	137	139855	139991	CTTCAACCCTTTGAGCGAAA	60.003	20	CTATGGTCGGTCTGTGACCC	60.004	20	133	108044	108176
NC_008326.1	9	p1	(T)10	10	10739	10748	CTATGGTCGGTCTGTGACCC	60.004	20	CTTCAACCCTTTGAGCGAAA	60.003	20	133	139859	139991	GGGTCTATGGTCGGTCTGTG	60.004	20	CTTCAACCCTTTGAGCGAAA	60.003	20	137	139855	139991	CTTCAACCCTTTGAGCGAAA	60.003	20	CTATGGTCGGTCTGTGACCC	60.004	20	133	108044	108176
NC_008326.1	10	p1	(A)20	20	12806	12825	CTATGGTCGGTCTGTGACCC	60.004	20	CTTCAACCCTTTGAGCGAAA	60.003	20	133	139859	139991	GGGTCTATGGTCGGTCTGTG	60.004	20	CTTCAACCCTTTGAGCGAAA	60.003	20	137	139855	139991	CTTCAACCCTTTGAGCGAAA	60.003	20	CTATGGTCGGTCTGTGACCC	60.004	20	133	108044	108176
NC_008326.1	11	p1	(A)12	12	13922	13933	CTATGGTCGGTCTGTGACCC	60.004	20	CTTCAACCCTTTGAGCGAAA	60.003	20	133	139859	139991	GGGTCTATGGTCGGTCTGTG	60.004	20	CTTCAACCCTTTGAGCGAAA	60.003	20	137	139855	139991	CTTCAACCCTTTGAGCGAAA	60.003	20	CTATGGTCGGTCTGTGACCC	60.004	20	133	108044	108176
NC_008326.1	12	p1	(T)11	11	14196	14206	CTATGGTCGGTCTGTGACCC	60.004	20	CTTCAACCCTTTGAGCGAAA	60.003	20	133	139859	139991	GGGTCTATGGTCGGTCTGTG	60.004	20	CTTCAACCCTTTGAGCGAAA	60.003	20	137	139855	139991	CTTCAACCCTTTGAGCGAAA	60.003	20	CTATGGTCGGTCTGTGACCC	60.004	20	133	108044	108176
NC_008326.1	13	p1	(T)10	10	15588	15597	CTATGGTCGGTCTGTGACCC	60.004	20	CTTCAACCCTTTGAGCGAAA	60.003	20	133	139859	139991	GGGTCTATGGTCGGTCTGTG	60.004	20	CTTCAACCCTTTGAGCGAAA	60.003	20	137	139855	139991	CTTCAACCCTTTGAGCGAAA	60.003	20	CTATGGTCGGTCTGTGACCC	60.004	20	133	108044	108176
NC_008326.1	14	c	(T)13c(A)12	26	15893	15918	CTATGGTCGGTCTGTGACCC	60.004	20	CTTCAACCCTTTGAGCGAAA	60.003	20	133	139859	139991	GGGTCTATGGTCGGTCTGTG	60.004	20	CTTCAACCCTTTGAGCGAAA	60.003	20	137	139855	139991	CTTCAACCCTTTGAGCGAAA	60.003	20	CTATGGTCGGTCTGTGACCC	60.004	20	133	108044	108176
NC_008326.1	15	p1	(T)11	11	17632	17642	CTATGGTCGGTCTGTGACCC	60.004	20	CTTCAACCCTTTGAGCGAAA	60.003	20	133	139859	139991	GGGTCTATGGTCGGTCTGTG	60.004	20	CTTCAACCCTTTGAGCGAAA	60.003	20	137	139855	139991	CTTCAACCCTTTGAGCGAAA	60.003	20	CTATGGTCGGTCTGTGACCC	60.004	20	133	108044	108176
NC_008326.1	16	p1	(T)12	12	19833	19844	CTATGGTCGGTCTGTGACCC	60.004	20	CTTCAACCCTTTGAGCGAAA	60.003	20	133	139859	139991	GGGTCTATGGTCGGTCTGTG	60.004	20	CTTCAACCCTTTGAGCGAAA	60.003	20	137	139855	139991	CTTCAACCCTTTGAGCGAAA	60.003	20	CTATGGTCGGTCTGTGACCC	60.004	20	133	108044	108176
NC_008326.1	17	p1	(T)10	10	27499	27508	CTATGGTCGGTCTGTGACCC	60.004	20	CTTCAACCCTTTGAGCGAAA	60.003	20	133	139859	139991	GGGTCTATGGTCGGTCTGTG	60.004	20	CTTCAACCCTTTGAGCGAAA	60.003	20	137	139855	139991	CTTCAACCCTTTGAGCGAAA	60.003	20	CTATGGTCGGTCTGTGACCC	60.004	20	133	108044	108176
NC_008326.1	18	p1	(A)11	11	29258	29268	CTATGGTCGGTCTGTGACCC	60.004	20	CTTCAACCCTTTGAGCGAAA	60.003	20	133	139859	139991	GGGTCTATGGTCGGTCTGTG	60.004	20	CTTCAACCCTTTGAGCGAAA	60.003	20	137	139855	139991	CTTCAACCCTTTGAGCGAAA	60.003	20	CTATGGTCGGTCTGTGACCC	60.004	20	133	108044	108176
NC_008326.1	19	p1	(C)10	10	32527	32536	CTATGGTCGGTCTGTGACCC	60.004	20	CTTCAACCCTTTGAGCGAAA	60.003	20	133	139859	139991	GGGTCTATGGTCGGTCTGTG	60.004	20	CTTCAACCCTTTGAGCGAAA	60.003	20	137	139855	139991	CTTCAACCCTTTGAGCGAAA	60.003	20	CTATGGTCGGTCTGTGACCC	60.004	20	133	108044	108176
NC_008326.1	20	p1	(T)11	11	34522	34532	CTATGGTCGGTCTGTGACCC	60.004	20	CTTCAACCCTTTGAGCGAAA	60.003	20	133	139859	139991	GGGTCTATGGTCGGTCTGTG	60.004	20	CTTCAACCCTTTGAGCGAAA	60.003	20	137	139855	139991	CTTCAACCCTTTGAGCGAAA	60.003	20	CTATGGTCGGTCTGTGACCC	60.004	20	133	108044	108176
NC_008326.1	21	p1	(A)14	14	38953	38966	CTATGGTCGGTCTGTGACCC	60.004	20	CTTCAACCCTTTGAGCGAAA	60.003	20	133	139859	139991	GGGTCTATGGTCGGTCTGTG	60.004	20	CTTCAACCCTTTGAGCGAAA	60.003	20	137	139855	139991	CTTCAACCCTTTGAGCGAAA	60.003	20	CTATGGTCGGTCTGTGACCC	60.004	20	133	108044	108176
NC_008326.1	22	p1	(A)11	11	40001	40011	CTATGGTCGGTCTGTGACCC	60.004	20	CTTCAACCCTTTGAGCGAAA	60.003	20	133	139859	139991	GGGTCTATGGTCGGTCTGTG	60.004	20	CTTCAACCCTTTGAGCGAAA	60.003	20	137	139855	139991	CTTCAACCCTTTGAGCGAAA	60.003	20	CTATGGTCGGTCTGTGACCC	60.004	20	133	108044	108176
NC_008326.1	23	p1	(A)17	17	46967	46983	CTATGGTCGGTCTGTGACCC	60.004	20	CTTCAACCCTTTGAGCGAAA	60.003	20	133	139859	139991	GGGTCTATGGTCGGTCTGTG	60.004	20	CTTCAACCCTTTGAGCGAAA	60.003	20	137	139855	139991	CTTCAACCCTTTGAGCGAAA	60.003	20	CTATGGTCGGTCTGTGACCC	60.004	20	133	108044	108176
NC_008326.1	24	p1	(T)10	10	48532	48541	CTATGGTCGGTCTGTGACCC	60.004	20	CTTCAACCCTTTGAGCGAAA	60.003	20	133	139859	139991	GGGTCTATGGTCGGTCTGTG	60.004	20	CTTCAACCCTTTGAGCGAAA	60.003	20	137	139855	139991	CTTCAACCCTTTGAGCGAAA	60.003	20	CTATGGTCGGTCTGTGACCC	60.004	20	133	108044	108176
NC_008326.1	25	p1	(A)10	10	50307	50316	CTATGGTCGGTCTGTGACCC	60.004	20	CTTCAACCCTTTGAGCGAAA	60.003	20	133	139859	139991	GGGTCTATGGTCGGTCTGTG	60.004	20	CTTCAACCCTTTGAGCGAAA	60.003	20	137	139855	139991	CTTCAACCCTTTGAGCGAAA	60.003	20	CTATGGTCGGTCTGTGACCC	60.004	20	133	108044	108176
NC_008326.1	26	p1	(T)10	10	51232	51241	CTATGGTCGGTCTGTGACCC	60.004	20	CTTCAACCCTTTGAGCGAAA	60.003	20	133	139859	139991	GGGTCTATGGTCGGTCTGTG	60.004	20	CTTCAACCCTTTGAGCGAAA	60.003	20	137	139855	139991	CTTCAACCCTTTGAGCGAAA	60.003	20	CTATGGTCGGTCTGTGACCC	60.004	20	133	108044	108176
NC_008326.1	27	p1	(T)12	12	53553	53564	CTATGGTCGGTCTGTGACCC	60.004	20	CTTCAACCCTTTGAGCGAAA	60.003	20	133	139859	139991	GGGTCTATGGTCGGTCTGTG	60.004	20	CTTCAACCCTTTGAGCGAAA	60.003	20	137	139855	139991	CTTCAACCCTTTGAGCGAAA	60.003	20	CTATGGTCGGTCTGTGACCC	60.004	20	133	108044	108176
NC_008326.1	28	p1	(T)11	11	54993	55003	CTATGGTCGGTCTGTGACCC	60.004	20	CTTCAACCCTTTGAGCGAAA	60.003	20	133	139859	139991	GGGTCTATGGTCGGTCTGTG	60.004	20	CTTCAACCCTTTGAGCGAAA	60.003	20	137	139855	139991	CTTCAACCCTTTGAGCGAAA	60.003	20	CTATGGTCGGTCTGTGACCC	60.004	20	133	108044	108176
NC_008326.1	29	p1	(T)10	10	55700	55709	CTATGGTCGGTCTGTGACCC	60.004	20	CTTCAACCCTTTGAGCGAAA	60.003	20	133	139859	139991	GGGTCTATGGTCGGTCTGTG	60.004	20	CTTCAACCCTTTGAGCGAAA	60.003	20	137	139855	139991	CTTCAACCCTTTGAGCGAAA	60.003	20	CTATGGTCGGTCTGTGACCC	60.004	20	133	108044	108176
NC_008326.1	30	p3	(ATA)6	18	57914	57931	CTATGGTCGGTCTGTGACCC	60.004	20	CTTCAACCCTTTGAGCGAAA	60.003	20	133	139859	139991	GGGTCTATGGTCGGTCTGTG	60.004	20	CTTCAACCCTTTGAGCGAAA	60.003	20	137	139855	139991	CTTCAACCCTTTGAGCGAAA	60.003	20	CTATGGTCGGTCTGTGACCC	60.004	20	133	108044	108176
NC_008326.1	31	p1	(A)10	10	58403	58412	CTATGGTCGGTCTGTGACCC	60.004	20	CTTCAACCCTTTGAGCGAAA	60.003	20	133	139859	139991	GGGTCTATGGTCGGTCTGTG	60.004	20	CTTCAACCCTTTGAGCGAAA	60.003	20	137	139855	139991	CTTCAACCCTTTGAGCGAAA	60.003	20	CTATGGTCGGTCTGTGACCC	60.004	20	133	108044	108176
NC_008326.1	32	p1	(T)10	10	64356	64365	CTATGGTCGGTCTGTGACCC	60.004	20	CTTCAACCCTTTGAGCGAAA	60.003	20	133	139859	139991	GGGTCTATGGTCGGTCTGTG	60.004	20	CTTCAACCCTTTGAGCGAAA	60.003	20	137	139855	139991	CTTCAACCCTTTGAGCGAAA	60.003	20	CTATGGTCGGTCTGTGACCC	60.004	20	133	108044	108176
NC_008326.1	33	p1	(A)12	12	64743	64754	CTATGGTCGGTCTGTGACCC	60.004	20	CTTCAACCCTTTGAGCGAAA	60.003	20	133	139859	139991	GGGTCTATGGTCGGTCTGTG	60.004	20	CTTCAACCCTTTGAGCGAAA	60.003	20	137	139855	139991	CTTCAACCCTTTGAGCGAAA	60.003	20	CTATGGTCGGTCTGTGACCC	60.004	20	133	108044	108176
NC_008326.1	34	c	(G)10agtaacttactgagcaaataaaacttcttcaatgaagttataaaaaaaagt(A)11gaaaattttaactgtgatgagataatcaataaggatttggataggcgcaaaaatccaagatttcatcttttcgcccggagcattaagagtc(T)14	177	67286	67462	CTATGGTCGGTCTGTGACCC	60.004	20	CTTCAACCCTTTGAGCGAAA	60.003	20	133	139859	139991	GGGTCTATGGTCGGTCTGTG	60.004	20	CTTCAACCCTTTGAGCGAAA	60.003	20	137	139855	139991	CTTCAACCCTTTGAGCGAAA	60.003	20	CTATGGTCGGTCTGTGACCC	60.004	20	133	108044	108176
NC_008326.1	35	p1	(A)10	10	69885	69894	CTATGGTCGGTCTGTGACCC	60.004	20	CTTCAACCCTTTGAGCGAAA	60.003	20	133	139859	139991	GGGTCTATGGTCGGTCTGTG	60.004	20	CTTCAACCCTTTGAGCGAAA	60.003	20	137	139855	139991	CTTCAACCCTTTGAGCGAAA	60.003	20	CTATGGTCGGTCTGTGACCC	60.004	20	133	108044	108176
NC_008326.1	36	p2	(TA)7	14	71887	71900	CTATGGTCGGTCTGTGACCC	60.004	20	CTTCAACCCTTTGAGCGAAA	60.003	20	133	139859	139991	GGGTCTATGGTCGGTCTGTG	60.004	20	CTTCAACCCTTTGAGCGAAA	60.003	20	137	139855	139991	CTTCAACCCTTTGAGCGAAA	60.003	20	CTATGGTCGGTCTGTGACCC	60.004	20	133	108044	108176
NC_008326.1	37	c	(A)10gaatgggagaagaaaaaatccg(T)12	44	72389	72432	CTATGGTCGGTCTGTGACCC	60.004	20	CTTCAACCCTTTGAGCGAAA	60.003	20	133	139859	139991	GGGTCTATGGTCGGTCTGTG	60.004	20	CTTCAACCCTTTGAGCGAAA	60.003	20	137	139855	139991	CTTCAACCCTTTGAGCGAAA	60.003	20	CTATGGTCGGTCTGTGACCC	60.004	20	133	108044	108176
NC_008326.1	38	p1	(T)12	12	74536	74547	CTATGGTCGGTCTGTGACCC	60.004	20	CTTCAACCCTTTGAGCGAAA	60.003	20	133	139859	139991	GGGTCTATGGTCGGTCTGTG	60.004	20	CTTCAACCCTTTGAGCGAAA	60.003	20	137	139855	139991	CTTCAACCCTTTGAGCGAAA	60.003	20	CTATGGTCGGTCTGTGACCC	60.004	20	133	108044	108176
NC_008326.1	39	p1	(T)14	14	75521	75534	CTATGGTCGGTCTGTGACCC	60.004	20	CTTCAACCCTTTGAGCGAAA	60.003	20	133	139859	139991	GGGTCTATGGTCGGTCTGTG	60.004	20	CTTCAACCCTTTGAGCGAAA	60.003	20	137	139855	139991	CTTCAACCCTTTGAGCGAAA	60.003	20	CTATGGTCGGTCTGTGACCC	60.004	20	133	108044	108176
NC_008326.1	40	p1	(T)10	10	77960	77969	CTATGGTCGGTCTGTGACCC	60.004	20	CTTCAACCCTTTGAGCGAAA	60.003	20	133	139859	139991	GGGTCTATGGTCGGTCTGTG	60.004	20	CTTCAACCCTTTGAGCGAAA	60.003	20	137	139855	139991	CTTCAACCCTTTGAGCGAAA	60.003	20	CTATGGTCGGTCTGTGACCC	60.004	20	133	108044	108176
NC_008326.1	41	p1	(T)12	12	82882	82893	CTATGGTCGGTCTGTGACCC	60.004	20	CTTCAACCCTTTGAGCGAAA	60.003	20	133	139859	139991	GGGTCTATGGTCGGTCTGTG	60.004	20	CTTCAACCCTTTGAGCGAAA	60.003	20	137	139855	139991	CTTCAACCCTTTGAGCGAAA	60.003	20	CTATGGTCGGTCTGTGACCC	60.004	20	133	108044	108176
NC_008326.1	42	p1	(T)16	16	84511	84526	CTATGGTCGGTCTGTGACCC	60.004	20	CTTCAACCCTTTGAGCGAAA	60.003	20	133	139859	139991	GGGTCTATGGTCGGTCTGTG	60.004	20	CTTCAACCCTTTGAGCGAAA	60.003	20	137	139855	139991	CTTCAACCCTTTGAGCGAAA	60.003	20	CTATGGTCGGTCTGTGACCC	60.004	20	133	108044	108176
NC_008326.1	43	p1	(T)10	10	87098	87107	CTATGGTCGGTCTGTGACCC	60.004	20	CTTCAACCCTTTGAGCGAAA	60.003	20	133	139859	139991	GGGTCTATGGTCGGTCTGTG	60.004	20	CTTCAACCCTTTGAGCGAAA	60.003	20	137	139855	139991	CTTCAACCCTTTGAGCGAAA	60.003	20	CTATGGTCGGTCTGTGACCC	60.004	20	133	108044	108176
NC_008326.1	44	p1	(T)13	13	107081	107093	CTATGGTCGGTCTGTGACCC	60.004	20	CTTCAACCCTTTGAGCGAAA	60.003	20	133	139859	139991	GGGTCTATGGTCGGTCTGTG	60.004	20	CTTCAACCCTTTGAGCGAAA	60.003	20	137	139855	139991	CTTCAACCCTTTGAGCGAAA	60.003	20	CTATGGTCGGTCTGTGACCC	60.004	20	133	108044	108176
NC_008326.1	45	p1	(A)12	12	112095	112106	CTATGGTCGGTCTGTGACCC	60.004	20	CTTCAACCCTTTGAGCGAAA	60.003	20	133	139859	139991	GGGTCTATGGTCGGTCTGTG	60.004	20	CTTCAACCCTTTGAGCGAAA	60.003	20	137	139855	139991	CTTCAACCCTTTGAGCGAAA	60.003	20	CTATGGTCGGTCTGTGACCC	60.004	20	133	108044	108176
NC_008326.1	46	p1	(A)11	11	117000	117010	CTATGGTCGGTCTGTGACCC	60.004	20	CTTCAACCCTTTGAGCGAAA	60.003	20	133	139859	139991	GGGTCTATGGTCGGTCTGTG	60.004	20	CTTCAACCCTTTGAGCGAAA	60.003	20	137	139855	139991	CTTCAACCCTTTGAGCGAAA	60.003	20	CTATGGTCGGTCTGTGACCC	60.004	20	133	108044	108176
NC_008326.1	47	p2	(AT)6	12	118454	118465	CTATGGTCGGTCTGTGACCC	60.004	20	CTTCAACCCTTTGAGCGAAA	60.003	20	133	139859	139991	GGGTCTATGGTCGGTCTGTG	60.004	20	CTTCAACCCTTTGAGCGAAA	60.003	20	137	139855	139991	CTTCAACCCTTTGAGCGAAA	60.003	20	CTATGGTCGGTCTGTGACCC	60.004	20	133	108044	108176
NC_008326.1	48	c	(C)12(T)11	23	118567	118589	CTATGGTCGGTCTGTGACCC	60.004	20	CTTCAACCCTTTGAGCGAAA	60.003	20	133	139859	139991	GGGTCTATGGTCGGTCTGTG	60.004	20	CTTCAACCCTTTGAGCGAAA	60.003	20	137	139855	139991	CTTCAACCCTTTGAGCGAAA	60.003	20	CTATGGTCGGTCTGTGACCC	60.004	20	133	108044	108176
NC_008326.1	49	p1	(T)14	14	122758	122771	CTATGGTCGGTCTGTGACCC	60.004	20	CTTCAACCCTTTGAGCGAAA	60.003	20	133	139859	139991	GGGTCTATGGTCGGTCTGTG	60.004	20	CTTCAACCCTTTGAGCGAAA	60.003	20	137	139855	139991	CTTCAACCCTTTGAGCGAAA	60.003	20	CTATGGTCGGTCTGTGACCC	60.004	20	133	108044	108176
NC_008326.1	50	p1	(T)12	12	124123	124134	CTATGGTCGGTCTGTGACCC	60.004	20	CTTCAACCCTTTGAGCGAAA	60.003	20	133	139859	139991	GGGTCTATGGTCGGTCTGTG	60.004	20	CTTCAACCCTTTGAGCGAAA	60.003	20	137	139855	139991	CTTCAACCCTTTGAGCGAAA	60.003	20	CTATGGTCGGTCTGTGACCC	60.004	20	133	108044	108176
NC_008326.1	51	p1	(T)10	10	128753	128762	CTATGGTCGGTCTGTGACCC	60.004	20	CTTCAACCCTTTGAGCGAAA	60.003	20	133	139859	139991	GGGTCTATGGTCGGTCTGTG	60.004	20	CTTCAACCCTTTGAGCGAAA	60.003	20	137	139855	139991	CTTCAACCCTTTGAGCGAAA	60.003	20	CTATGGTCGGTCTGTGACCC	60.004	20	133	108044	108176
NC_008326.1	52	p2	(AT)6	12	129087	129098	CTATGGTCGGTCTGTGACCC	60.004	20	CTTCAACCCTTTGAGCGAAA	60.003	20	133	139859	139991	GGGTCTATGGTCGGTCTGTG	60.004	20	CTTCAACCCTTTGAGCGAAA	60.003	20	137	139855	139991	CTTCAACCCTTTGAGCGAAA	60.003	20	CTATGGTCGGTCTGTGACCC	60.004	20	133	108044	108176
NC_008326.1	53	p1	(A)10	10	130261	130270	CTATGGTCGGTCTGTGACCC	60.004	20	CTTCAACCCTTTGAGCGAAA	60.003	20	133	139859	139991	GGGTCTATGGTCGGTCTGTG	60.004	20	CTTCAACCCTTTGAGCGAAA	60.003	20	137	139855	139991	CTTCAACCCTTTGAGCGAAA	60.003	20	CTATGGTCGGTCTGTGACCC	60.004	20	133	108044	108176
NC_008326.1	54	p1	(A)11	11	132477	132487	CTATGGTCGGTCTGTGACCC	60.004	20	CTTCAACCCTTTGAGCGAAA	60.003	20	133	139859	139991	GGGTCTATGGTCGGTCTGTG	60.004	20	CTTCAACCCTTTGAGCGAAA	60.003	20	137	139855	139991	CTTCAACCCTTTGAGCGAAA	60.003	20	CTATGGTCGGTCTGTGACCC	60.004	20	133	108044	108176
NC_008326.1	55	p1	(T)12	12	135931	135942	CTATGGTCGGTCTGTGACCC	60.004	20	CTTCAACCCTTTGAGCGAAA	60.003	20	133	139859	139991	GGGTCTATGGTCGGTCTGTG	60.004	20	CTTCAACCCTTTGAGCGAAA	60.003	20	137	139855	139991	CTTCAACCCTTTGAGCGAAA	60.003	20	CTATGGTCGGTCTGTGACCC	60.004	20	133	108044	108176
NC_008326.1	56	p1	(A)13	13	140944	140956	CTATGGTCGGTCTGTGACCC	60.004	20	CTTCAACCCTTTGAGCGAAA	60.003	20	133	139859	139991	GGGTCTATGGTCGGTCTGTG	60.004	20	CTTCAACCCTTTGAGCGAAA	60.003	20	137	139855	139991	CTTCAACCCTTTGAGCGAAA	60.003	20	CTATGGTCGGTCTGTGACCC	60.004	20	133	108044	108176
NC_029944.1	1	p1	(A)12	12	262	273	CTGGTCCTTTTACCCGGACT	60.004	20	CCGGTACTTGTGGATTCAGG	60	20	129	81764	81892	AGACCTGGTCCTTTTACCCG	60.004	20	CGGTACTTGTGGATTCAGGG	60	20	132	81760	81891	AGACCTGGTCCTTTTACCCG	60.004	20	CCGGTACTTGTGGATTCAGG	60	20	133	81760	81892
NC_029944.1	2	p1	(A)11	11	4014	4024	CTGGTCCTTTTACCCGGACT	60.004	20	CCGGTACTTGTGGATTCAGG	60	20	129	81764	81892	AGACCTGGTCCTTTTACCCG	60.004	20	CGGTACTTGTGGATTCAGGG	60	20	132	81760	81891	AGACCTGGTCCTTTTACCCG	60.004	20	CCGGTACTTGTGGATTCAGG	60	20	133	81760	81892
NC_029944.1	3	p1	(A)12	12	4843	4854	CTGGTCCTTTTACCCGGACT	60.004	20	CCGGTACTTGTGGATTCAGG	60	20	129	81764	81892	AGACCTGGTCCTTTTACCCG	60.004	20	CGGTACTTGTGGATTCAGGG	60	20	132	81760	81891	AGACCTGGTCCTTTTACCCG	60.004	20	CCGGTACTTGTGGATTCAGG	60	20	133	81760	81892
NC_029944.1	4	p1	(T)10	10	5587	5596	CTGGTCCTTTTACCCGGACT	60.004	20	CCGGTACTTGTGGATTCAGG	60	20	129	81764	81892	AGACCTGGTCCTTTTACCCG	60.004	20	CGGTACTTGTGGATTCAGGG	60	20	132	81760	81891	AGACCTGGTCCTTTTACCCG	60.004	20	CCGGTACTTGTGGATTCAGG	60	20	133	81760	81892
NC_029944.1	5	p1	(T)11	11	6518	6528	CTGGTCCTTTTACCCGGACT	60.004	20	CCGGTACTTGTGGATTCAGG	60	20	129	81764	81892	AGACCTGGTCCTTTTACCCG	60.004	20	CGGTACTTGTGGATTCAGGG	60	20	132	81760	81891	AGACCTGGTCCTTTTACCCG	60.004	20	CCGGTACTTGTGGATTCAGG	60	20	133	81760	81892
NC_029944.1	6	p1	(T)11	11	7451	7461	CTGGTCCTTTTACCCGGACT	60.004	20	CCGGTACTTGTGGATTCAGG	60	20	129	81764	81892	AGACCTGGTCCTTTTACCCG	60.004	20	CGGTACTTGTGGATTCAGGG	60	20	132	81760	81891	AGACCTGGTCCTTTTACCCG	60.004	20	CCGGTACTTGTGGATTCAGG	60	20	133	81760	81892
NC_029944.1	7	p1	(A)10	10	7974	7983	CTGGTCCTTTTACCCGGACT	60.004	20	CCGGTACTTGTGGATTCAGG	60	20	129	81764	81892	AGACCTGGTCCTTTTACCCG	60.004	20	CGGTACTTGTGGATTCAGGG	60	20	132	81760	81891	AGACCTGGTCCTTTTACCCG	60.004	20	CCGGTACTTGTGGATTCAGG	60	20	133	81760	81892
NC_029944.1	8	p1	(T)11	11	8577	8587	CTGGTCCTTTTACCCGGACT	60.004	20	CCGGTACTTGTGGATTCAGG	60	20	129	81764	81892	AGACCTGGTCCTTTTACCCG	60.004	20	CGGTACTTGTGGATTCAGGG	60	20	132	81760	81891	AGACCTGGTCCTTTTACCCG	60.004	20	CCGGTACTTGTGGATTCAGG	60	20	133	81760	81892
NC_029944.1	9	p1	(A)10	10	8779	8788	CTGGTCCTTTTACCCGGACT	60.004	20	CCGGTACTTGTGGATTCAGG	60	20	129	81764	81892	AGACCTGGTCCTTTTACCCG	60.004	20	CGGTACTTGTGGATTCAGGG	60	20	132	81760	81891	AGACCTGGTCCTTTTACCCG	60.004	20	CCGGTACTTGTGGATTCAGG	60	20	133	81760	81892
NC_029944.1	10	p1	(A)10	10	12987	12996	CTGGTCCTTTTACCCGGACT	60.004	20	CCGGTACTTGTGGATTCAGG	60	20	129	81764	81892	AGACCTGGTCCTTTTACCCG	60.004	20	CGGTACTTGTGGATTCAGGG	60	20	132	81760	81891	AGACCTGGTCCTTTTACCCG	60.004	20	CCGGTACTTGTGGATTCAGG	60	20	133	81760	81892
NC_029944.1	11	p1	(A)11	11	13645	13655	CTGGTCCTTTTACCCGGACT	60.004	20	CCGGTACTTGTGGATTCAGG	60	20	129	81764	81892	AGACCTGGTCCTTTTACCCG	60.004	20	CGGTACTTGTGGATTCAGGG	60	20	132	81760	81891	AGACCTGGTCCTTTTACCCG	60.004	20	CCGGTACTTGTGGATTCAGG	60	20	133	81760	81892
NC_029944.1	12	p1	(A)12	12	15025	15036	CTGGTCCTTTTACCCGGACT	60.004	20	CCGGTACTTGTGGATTCAGG	60	20	129	81764	81892	AGACCTGGTCCTTTTACCCG	60.004	20	CGGTACTTGTGGATTCAGGG	60	20	132	81760	81891	AGACCTGGTCCTTTTACCCG	60.004	20	CCGGTACTTGTGGATTCAGG	60	20	133	81760	81892
NC_029944.1	13	p1	(T)10	10	18811	18820	CTGGTCCTTTTACCCGGACT	60.004	20	CCGGTACTTGTGGATTCAGG	60	20	129	81764	81892	AGACCTGGTCCTTTTACCCG	60.004	20	CGGTACTTGTGGATTCAGGG	60	20	132	81760	81891	AGACCTGGTCCTTTTACCCG	60.004	20	CCGGTACTTGTGGATTCAGG	60	20	133	81760	81892
NC_029944.1	14	p1	(T)11	11	22950	22960	CTGGTCCTTTTACCCGGACT	60.004	20	CCGGTACTTGTGGATTCAGG	60	20	129	81764	81892	AGACCTGGTCCTTTTACCCG	60.004	20	CGGTACTTGTGGATTCAGGG	60	20	132	81760	81891	AGACCTGGTCCTTTTACCCG	60.004	20	CCGGTACTTGTGGATTCAGG	60	20	133	81760	81892
NC_029944.1	15	p1	(T)10	10	26599	26608	CTGGTCCTTTTACCCGGACT	60.004	20	CCGGTACTTGTGGATTCAGG	60	20	129	81764	81892	AGACCTGGTCCTTTTACCCG	60.004	20	CGGTACTTGTGGATTCAGGG	60	20	132	81760	81891	AGACCTGGTCCTTTTACCCG	60.004	20	CCGGTACTTGTGGATTCAGG	60	20	133	81760	81892
NC_029944.1	16	p1	(A)11	11	28157	28167	CTGGTCCTTTTACCCGGACT	60.004	20	CCGGTACTTGTGGATTCAGG	60	20	129	81764	81892	AGACCTGGTCCTTTTACCCG	60.004	20	CGGTACTTGTGGATTCAGGG	60	20	132	81760	81891	AGACCTGGTCCTTTTACCCG	60.004	20	CCGGTACTTGTGGATTCAGG	60	20	133	81760	81892
NC_029944.1	17	p1	(T)10	10	29513	29522	CTGGTCCTTTTACCCGGACT	60.004	20	CCGGTACTTGTGGATTCAGG	60	20	129	81764	81892	AGACCTGGTCCTTTTACCCG	60.004	20	CGGTACTTGTGGATTCAGGG	60	20	132	81760	81891	AGACCTGGTCCTTTTACCCG	60.004	20	CCGGTACTTGTGGATTCAGG	60	20	133	81760	81892
NC_029944.1	18	p1	(T)10	10	30214	30223	CTGGTCCTTTTACCCGGACT	60.004	20	CCGGTACTTGTGGATTCAGG	60	20	129	81764	81892	AGACCTGGTCCTTTTACCCG	60.004	20	CGGTACTTGTGGATTCAGGG	60	20	132	81760	81891	AGACCTGGTCCTTTTACCCG	60.004	20	CCGGTACTTGTGGATTCAGG	60	20	133	81760	81892
NC_029944.1	19	p1	(T)11	11	31640	31650	CTGGTCCTTTTACCCGGACT	60.004	20	CCGGTACTTGTGGATTCAGG	60	20	129	81764	81892	AGACCTGGTCCTTTTACCCG	60.004	20	CGGTACTTGTGGATTCAGGG	60	20	132	81760	81891	AGACCTGGTCCTTTTACCCG	60.004	20	CCGGTACTTGTGGATTCAGG	60	20	133	81760	81892
NC_029944.1	20	p1	(G)11	11	35436	35446	CTGGTCCTTTTACCCGGACT	60.004	20	CCGGTACTTGTGGATTCAGG	60	20	129	81764	81892	AGACCTGGTCCTTTTACCCG	60.004	20	CGGTACTTGTGGATTCAGGG	60	20	132	81760	81891	AGACCTGGTCCTTTTACCCG	60.004	20	CCGGTACTTGTGGATTCAGG	60	20	133	81760	81892
NC_029944.1	21	p1	(C)10	10	41433	41442	CTGGTCCTTTTACCCGGACT	60.004	20	CCGGTACTTGTGGATTCAGG	60	20	129	81764	81892	AGACCTGGTCCTTTTACCCG	60.004	20	CGGTACTTGTGGATTCAGGG	60	20	132	81760	81891	AGACCTGGTCCTTTTACCCG	60.004	20	CCGGTACTTGTGGATTCAGG	60	20	133	81760	81892
NC_029944.1	22	p1	(T)10	10	43077	43086	CTGGTCCTTTTACCCGGACT	60.004	20	CCGGTACTTGTGGATTCAGG	60	20	129	81764	81892	AGACCTGGTCCTTTTACCCG	60.004	20	CGGTACTTGTGGATTCAGGG	60	20	132	81760	81891	AGACCTGGTCCTTTTACCCG	60.004	20	CCGGTACTTGTGGATTCAGG	60	20	133	81760	81892
NC_029944.1	23	p1	(T)10	10	44009	44018	CTGGTCCTTTTACCCGGACT	60.004	20	CCGGTACTTGTGGATTCAGG	60	20	129	81764	81892	AGACCTGGTCCTTTTACCCG	60.004	20	CGGTACTTGTGGATTCAGGG	60	20	132	81760	81891	AGACCTGGTCCTTTTACCCG	60.004	20	CCGGTACTTGTGGATTCAGG	60	20	133	81760	81892
NC_029944.1	24	p1	(T)10	10	44483	44492	CTGGTCCTTTTACCCGGACT	60.004	20	CCGGTACTTGTGGATTCAGG	60	20	129	81764	81892	AGACCTGGTCCTTTTACCCG	60.004	20	CGGTACTTGTGGATTCAGGG	60	20	132	81760	81891	AGACCTGGTCCTTTTACCCG	60.004	20	CCGGTACTTGTGGATTCAGG	60	20	133	81760	81892
NC_029944.1	25	c	(T)10caaaaaaacaacaattttctttctatccggaagcgtgtgcccttctcgtaagactgag(A)15	83	45504	45586	CTGGTCCTTTTACCCGGACT	60.004	20	CCGGTACTTGTGGATTCAGG	60	20	129	81764	81892	AGACCTGGTCCTTTTACCCG	60.004	20	CGGTACTTGTGGATTCAGGG	60	20	132	81760	81891	AGACCTGGTCCTTTTACCCG	60.004	20	CCGGTACTTGTGGATTCAGG	60	20	133	81760	81892
NC_029944.1	26	p1	(A)10	10	45832	45841	CTGGTCCTTTTACCCGGACT	60.004	20	CCGGTACTTGTGGATTCAGG	60	20	129	81764	81892	AGACCTGGTCCTTTTACCCG	60.004	20	CGGTACTTGTGGATTCAGGG	60	20	132	81760	81891	AGACCTGGTCCTTTTACCCG	60.004	20	CCGGTACTTGTGGATTCAGG	60	20	133	81760	81892
NC_029944.1	27	p1	(T)11	11	47586	47596	CTGGTCCTTTTACCCGGACT	60.004	20	CCGGTACTTGTGGATTCAGG	60	20	129	81764	81892	AGACCTGGTCCTTTTACCCG	60.004	20	CGGTACTTGTGGATTCAGGG	60	20	132	81760	81891	AGACCTGGTCCTTTTACCCG	60.004	20	CCGGTACTTGTGGATTCAGG	60	20	133	81760	81892
NC_029944.1	28	p2	(TA)6	12	49875	49886	CTGGTCCTTTTACCCGGACT	60.004	20	CCGGTACTTGTGGATTCAGG	60	20	129	81764	81892	AGACCTGGTCCTTTTACCCG	60.004	20	CGGTACTTGTGGATTCAGGG	60	20	132	81760	81891	AGACCTGGTCCTTTTACCCG	60.004	20	CCGGTACTTGTGGATTCAGG	60	20	133	81760	81892
NC_029944.1	29	p1	(T)11	11	50517	50527	CTGGTCCTTTTACCCGGACT	60.004	20	CCGGTACTTGTGGATTCAGG	60	20	129	81764	81892	AGACCTGGTCCTTTTACCCG	60.004	20	CGGTACTTGTGGATTCAGGG	60	20	132	81760	81891	AGACCTGGTCCTTTTACCCG	60.004	20	CCGGTACTTGTGGATTCAGG	60	20	133	81760	81892
NC_029944.1	30	p1	(T)12	12	53979	53990	CTGGTCCTTTTACCCGGACT	60.004	20	CCGGTACTTGTGGATTCAGG	60	20	129	81764	81892	AGACCTGGTCCTTTTACCCG	60.004	20	CGGTACTTGTGGATTCAGGG	60	20	132	81760	81891	AGACCTGGTCCTTTTACCCG	60.004	20	CCGGTACTTGTGGATTCAGG	60	20	133	81760	81892
NC_029944.1	31	p1	(T)10	10	54111	54120	CTGGTCCTTTTACCCGGACT	60.004	20	CCGGTACTTGTGGATTCAGG	60	20	129	81764	81892	AGACCTGGTCCTTTTACCCG	60.004	20	CGGTACTTGTGGATTCAGGG	60	20	132	81760	81891	AGACCTGGTCCTTTTACCCG	60.004	20	CCGGTACTTGTGGATTCAGG	60	20	133	81760	81892
NC_029944.1	32	p1	(A)12	12	57542	57553	CTGGTCCTTTTACCCGGACT	60.004	20	CCGGTACTTGTGGATTCAGG	60	20	129	81764	81892	AGACCTGGTCCTTTTACCCG	60.004	20	CGGTACTTGTGGATTCAGGG	60	20	132	81760	81891	AGACCTGGTCCTTTTACCCG	60.004	20	CCGGTACTTGTGGATTCAGG	60	20	133	81760	81892
NC_029944.1	33	p1	(A)15	15	61872	61886	CTGGTCCTTTTACCCGGACT	60.004	20	CCGGTACTTGTGGATTCAGG	60	20	129	81764	81892	AGACCTGGTCCTTTTACCCG	60.004	20	CGGTACTTGTGGATTCAGGG	60	20	132	81760	81891	AGACCTGGTCCTTTTACCCG	60.004	20	CCGGTACTTGTGGATTCAGG	60	20	133	81760	81892
NC_029944.1	34	c	(CTT)5ttttttatttacatgattttttatatcatgtaaataaaaaaaagaagaagaag(A)10	78	62092	62169	CTGGTCCTTTTACCCGGACT	60.004	20	CCGGTACTTGTGGATTCAGG	60	20	129	81764	81892	AGACCTGGTCCTTTTACCCG	60.004	20	CGGTACTTGTGGATTCAGGG	60	20	132	81760	81891	AGACCTGGTCCTTTTACCCG	60.004	20	CCGGTACTTGTGGATTCAGG	60	20	133	81760	81892
NC_029944.1	35	p1	(T)11	11	63212	63222	CTGGTCCTTTTACCCGGACT	60.004	20	CCGGTACTTGTGGATTCAGG	60	20	129	81764	81892	AGACCTGGTCCTTTTACCCG	60.004	20	CGGTACTTGTGGATTCAGGG	60	20	132	81760	81891	AGACCTGGTCCTTTTACCCG	60.004	20	CCGGTACTTGTGGATTCAGG	60	20	133	81760	81892
NC_029944.1	36	p1	(A)10	10	65267	65276	CTGGTCCTTTTACCCGGACT	60.004	20	CCGGTACTTGTGGATTCAGG	60	20	129	81764	81892	AGACCTGGTCCTTTTACCCG	60.004	20	CGGTACTTGTGGATTCAGGG	60	20	132	81760	81891	AGACCTGGTCCTTTTACCCG	60.004	20	CCGGTACTTGTGGATTCAGG	60	20	133	81760	81892
NC_029944.1	37	p1	(T)11	11	65411	65421	CTGGTCCTTTTACCCGGACT	60.004	20	CCGGTACTTGTGGATTCAGG	60	20	129	81764	81892	AGACCTGGTCCTTTTACCCG	60.004	20	CGGTACTTGTGGATTCAGGG	60	20	132	81760	81891	AGACCTGGTCCTTTTACCCG	60.004	20	CCGGTACTTGTGGATTCAGG	60	20	133	81760	81892
NC_029944.1	38	p1	(T)10	10	65618	65627	CTGGTCCTTTTACCCGGACT	60.004	20	CCGGTACTTGTGGATTCAGG	60	20	129	81764	81892	AGACCTGGTCCTTTTACCCG	60.004	20	CGGTACTTGTGGATTCAGGG	60	20	132	81760	81891	AGACCTGGTCCTTTTACCCG	60.004	20	CCGGTACTTGTGGATTCAGG	60	20	133	81760	81892
NC_029944.1	39	p1	(A)10	10	66228	66237	CTGGTCCTTTTACCCGGACT	60.004	20	CCGGTACTTGTGGATTCAGG	60	20	129	81764	81892	AGACCTGGTCCTTTTACCCG	60.004	20	CGGTACTTGTGGATTCAGGG	60	20	132	81760	81891	AGACCTGGTCCTTTTACCCG	60.004	20	CCGGTACTTGTGGATTCAGG	60	20	133	81760	81892
NC_029944.1	40	c	(A)13gaaaatagaattttttttatttcttttttttatttcttatttcatagtgatttatgttcatgaagagtttcc(T)14	99	66857	66955	CTGGTCCTTTTACCCGGACT	60.004	20	CCGGTACTTGTGGATTCAGG	60	20	129	81764	81892	AGACCTGGTCCTTTTACCCG	60.004	20	CGGTACTTGTGGATTCAGGG	60	20	132	81760	81891	AGACCTGGTCCTTTTACCCG	60.004	20	CCGGTACTTGTGGATTCAGG	60	20	133	81760	81892
NC_029944.1	41	p1	(A)11	11	68249	68259	CTGGTCCTTTTACCCGGACT	60.004	20	CCGGTACTTGTGGATTCAGG	60	20	129	81764	81892	AGACCTGGTCCTTTTACCCG	60.004	20	CGGTACTTGTGGATTCAGGG	60	20	132	81760	81891	AGACCTGGTCCTTTTACCCG	60.004	20	CCGGTACTTGTGGATTCAGG	60	20	133	81760	81892
NC_029944.1	42	p1	(A)11	11	68821	68831	CTGGTCCTTTTACCCGGACT	60.004	20	CCGGTACTTGTGGATTCAGG	60	20	129	81764	81892	AGACCTGGTCCTTTTACCCG	60.004	20	CGGTACTTGTGGATTCAGGG	60	20	132	81760	81891	AGACCTGGTCCTTTTACCCG	60.004	20	CCGGTACTTGTGGATTCAGG	60	20	133	81760	81892
NC_029944.1	43	p1	(T)15	15	68966	68980	CTGGTCCTTTTACCCGGACT	60.004	20	CCGGTACTTGTGGATTCAGG	60	20	129	81764	81892	AGACCTGGTCCTTTTACCCG	60.004	20	CGGTACTTGTGGATTCAGGG	60	20	132	81760	81891	AGACCTGGTCCTTTTACCCG	60.004	20	CCGGTACTTGTGGATTCAGG	60	20	133	81760	81892
NC_029944.1	44	p1	(T)10	10	71997	72006	CTGGTCCTTTTACCCGGACT	60.004	20	CCGGTACTTGTGGATTCAGG	60	20	129	81764	81892	AGACCTGGTCCTTTTACCCG	60.004	20	CGGTACTTGTGGATTCAGGG	60	20	132	81760	81891	AGACCTGGTCCTTTTACCCG	60.004	20	CCGGTACTTGTGGATTCAGG	60	20	133	81760	81892
NC_029944.1	45	p1	(A)13	13	72207	72219	CTGGTCCTTTTACCCGGACT	60.004	20	CCGGTACTTGTGGATTCAGG	60	20	129	81764	81892	AGACCTGGTCCTTTTACCCG	60.004	20	CGGTACTTGTGGATTCAGGG	60	20	132	81760	81891	AGACCTGGTCCTTTTACCCG	60.004	20	CCGGTACTTGTGGATTCAGG	60	20	133	81760	81892
NC_029944.1	46	p1	(A)13	13	72754	72766	CTGGTCCTTTTACCCGGACT	60.004	20	CCGGTACTTGTGGATTCAGG	60	20	129	81764	81892	AGACCTGGTCCTTTTACCCG	60.004	20	CGGTACTTGTGGATTCAGGG	60	20	132	81760	81891	AGACCTGGTCCTTTTACCCG	60.004	20	CCGGTACTTGTGGATTCAGG	60	20	133	81760	81892
NC_029944.1	47	p1	(T)15	15	72917	72931	CTGGTCCTTTTACCCGGACT	60.004	20	CCGGTACTTGTGGATTCAGG	60	20	129	81764	81892	AGACCTGGTCCTTTTACCCG	60.004	20	CGGTACTTGTGGATTCAGGG	60	20	132	81760	81891	AGACCTGGTCCTTTTACCCG	60.004	20	CCGGTACTTGTGGATTCAGG	60	20	133	81760	81892
NC_029944.1	48	p1	(T)10	10	73649	73658	CTGGTCCTTTTACCCGGACT	60.004	20	CCGGTACTTGTGGATTCAGG	60	20	129	81764	81892	AGACCTGGTCCTTTTACCCG	60.004	20	CGGTACTTGTGGATTCAGGG	60	20	132	81760	81891	AGACCTGGTCCTTTTACCCG	60.004	20	CCGGTACTTGTGGATTCAGG	60	20	133	81760	81892
NC_029944.1	49	p1	(T)11	11	73861	73871	CTGGTCCTTTTACCCGGACT	60.004	20	CCGGTACTTGTGGATTCAGG	60	20	129	81764	81892	AGACCTGGTCCTTTTACCCG	60.004	20	CGGTACTTGTGGATTCAGGG	60	20	132	81760	81891	AGACCTGGTCCTTTTACCCG	60.004	20	CCGGTACTTGTGGATTCAGG	60	20	133	81760	81892
NC_029944.1	50	p1	(T)12	12	74585	74596	CTGGTCCTTTTACCCGGACT	60.004	20	CCGGTACTTGTGGATTCAGG	60	20	129	81764	81892	AGACCTGGTCCTTTTACCCG	60.004	20	CGGTACTTGTGGATTCAGGG	60	20	132	81760	81891	AGACCTGGTCCTTTTACCCG	60.004	20	CCGGTACTTGTGGATTCAGG	60	20	133	81760	81892
NC_029944.1	51	p1	(T)10	10	77715	77724	CTGGTCCTTTTACCCGGACT	60.004	20	CCGGTACTTGTGGATTCAGG	60	20	129	81764	81892	AGACCTGGTCCTTTTACCCG	60.004	20	CGGTACTTGTGGATTCAGGG	60	20	132	81760	81891	AGACCTGGTCCTTTTACCCG	60.004	20	CCGGTACTTGTGGATTCAGG	60	20	133	81760	81892
NC_029944.1	52	p1	(A)10	10	77954	77963	CTGGTCCTTTTACCCGGACT	60.004	20	CCGGTACTTGTGGATTCAGG	60	20	129	81764	81892	AGACCTGGTCCTTTTACCCG	60.004	20	CGGTACTTGTGGATTCAGGG	60	20	132	81760	81891	AGACCTGGTCCTTTTACCCG	60.004	20	CCGGTACTTGTGGATTCAGG	60	20	133	81760	81892
NC_029944.1	53	p1	(T)11	11	78087	78097	CTGGTCCTTTTACCCGGACT	60.004	20	CCGGTACTTGTGGATTCAGG	60	20	129	81764	81892	AGACCTGGTCCTTTTACCCG	60.004	20	CGGTACTTGTGGATTCAGGG	60	20	132	81760	81891	AGACCTGGTCCTTTTACCCG	60.004	20	CCGGTACTTGTGGATTCAGG	60	20	133	81760	81892
NC_029944.1	54	p1	(A)11	11	82666	82676	CTGGTCCTTTTACCCGGACT	60.004	20	CCGGTACTTGTGGATTCAGG	60	20	129	81764	81892	AGACCTGGTCCTTTTACCCG	60.004	20	CGGTACTTGTGGATTCAGGG	60	20	132	81760	81891	AGACCTGGTCCTTTTACCCG	60.004	20	CCGGTACTTGTGGATTCAGG	60	20	133	81760	81892
NC_029944.1	55	p1	(T)13	13	83177	83189	CTGGTCCTTTTACCCGGACT	60.004	20	CCGGTACTTGTGGATTCAGG	60	20	129	81764	81892	AGACCTGGTCCTTTTACCCG	60.004	20	CGGTACTTGTGGATTCAGGG	60	20	132	81760	81891	AGACCTGGTCCTTTTACCCG	60.004	20	CCGGTACTTGTGGATTCAGG	60	20	133	81760	81892
NC_029944.1	56	p1	(A)14	14	84286	84299	CTGGTCCTTTTACCCGGACT	60.004	20	CCGGTACTTGTGGATTCAGG	60	20	129	81764	81892	AGACCTGGTCCTTTTACCCG	60.004	20	CGGTACTTGTGGATTCAGGG	60	20	132	81760	81891	AGACCTGGTCCTTTTACCCG	60.004	20	CCGGTACTTGTGGATTCAGG	60	20	133	81760	81892
NC_029944.1	57	p1	(T)11	11	84907	84917	CTGGTCCTTTTACCCGGACT	60.004	20	CCGGTACTTGTGGATTCAGG	60	20	129	81764	81892	AGACCTGGTCCTTTTACCCG	60.004	20	CGGTACTTGTGGATTCAGGG	60	20	132	81760	81891	AGACCTGGTCCTTTTACCCG	60.004	20	CCGGTACTTGTGGATTCAGG	60	20	133	81760	81892
NC_029944.1	58	c	(T)14ctctcacccttccatattatccgtatccctttttgctttacaactttctgatctgattgatttctttttgtatcttatgtcaaaaata(T)12	114	85059	85172	CTGGTCCTTTTACCCGGACT	60.004	20	CCGGTACTTGTGGATTCAGG	60	20	129	81764	81892	AGACCTGGTCCTTTTACCCG	60.004	20	CGGTACTTGTGGATTCAGGG	60	20	132	81760	81891	AGACCTGGTCCTTTTACCCG	60.004	20	CCGGTACTTGTGGATTCAGG	60	20	133	81760	81892
NC_029944.1	59	p1	(T)10	10	85440	85449	CTGGTCCTTTTACCCGGACT	60.004	20	CCGGTACTTGTGGATTCAGG	60	20	129	81764	81892	AGACCTGGTCCTTTTACCCG	60.004	20	CGGTACTTGTGGATTCAGGG	60	20	132	81760	81891	AGACCTGGTCCTTTTACCCG	60.004	20	CCGGTACTTGTGGATTCAGG	60	20	133	81760	81892
NC_029944.1	60	p1	(A)10	10	92030	92039	CTGGTCCTTTTACCCGGACT	60.004	20	CCGGTACTTGTGGATTCAGG	60	20	129	81764	81892	AGACCTGGTCCTTTTACCCG	60.004	20	CGGTACTTGTGGATTCAGGG	60	20	132	81760	81891	AGACCTGGTCCTTTTACCCG	60.004	20	CCGGTACTTGTGGATTCAGG	60	20	133	81760	81892
NC_029944.1	61	p1	(A)13	13	112718	112730	CTGGTCCTTTTACCCGGACT	60.004	20	CCGGTACTTGTGGATTCAGG	60	20	129	81764	81892	AGACCTGGTCCTTTTACCCG	60.004	20	CGGTACTTGTGGATTCAGGG	60	20	132	81760	81891	AGACCTGGTCCTTTTACCCG	60.004	20	CCGGTACTTGTGGATTCAGG	60	20	133	81760	81892
NC_029944.1	62	p1	(T)13	13	114294	114306	CTGGTCCTTTTACCCGGACT	60.004	20	CCGGTACTTGTGGATTCAGG	60	20	129	81764	81892	AGACCTGGTCCTTTTACCCG	60.004	20	CGGTACTTGTGGATTCAGGG	60	20	132	81760	81891	AGACCTGGTCCTTTTACCCG	60.004	20	CCGGTACTTGTGGATTCAGG	60	20	133	81760	81892
NC_029944.1	63	p1	(T)14	14	117304	117317	CTGGTCCTTTTACCCGGACT	60.004	20	CCGGTACTTGTGGATTCAGG	60	20	129	81764	81892	AGACCTGGTCCTTTTACCCG	60.004	20	CGGTACTTGTGGATTCAGGG	60	20	132	81760	81891	AGACCTGGTCCTTTTACCCG	60.004	20	CCGGTACTTGTGGATTCAGG	60	20	133	81760	81892
NC_029944.1	64	p1	(A)12	12	117432	117443	CTGGTCCTTTTACCCGGACT	60.004	20	CCGGTACTTGTGGATTCAGG	60	20	129	81764	81892	AGACCTGGTCCTTTTACCCG	60.004	20	CGGTACTTGTGGATTCAGGG	60	20	132	81760	81891	AGACCTGGTCCTTTTACCCG	60.004	20	CCGGTACTTGTGGATTCAGG	60	20	133	81760	81892
NC_029944.1	65	p1	(T)11	11	118073	118083	CTGGTCCTTTTACCCGGACT	60.004	20	CCGGTACTTGTGGATTCAGG	60	20	129	81764	81892	AGACCTGGTCCTTTTACCCG	60.004	20	CGGTACTTGTGGATTCAGGG	60	20	132	81760	81891	AGACCTGGTCCTTTTACCCG	60.004	20	CCGGTACTTGTGGATTCAGG	60	20	133	81760	81892
NC_029944.1	66	p2	(AT)8	16	118298	118313	CTGGTCCTTTTACCCGGACT	60.004	20	CCGGTACTTGTGGATTCAGG	60	20	129	81764	81892	AGACCTGGTCCTTTTACCCG	60.004	20	CGGTACTTGTGGATTCAGGG	60	20	132	81760	81891	AGACCTGGTCCTTTTACCCG	60.004	20	CCGGTACTTGTGGATTCAGG	60	20	133	81760	81892
NC_029944.1	67	p1	(T)12	12	118423	118434	CTGGTCCTTTTACCCGGACT	60.004	20	CCGGTACTTGTGGATTCAGG	60	20	129	81764	81892	AGACCTGGTCCTTTTACCCG	60.004	20	CGGTACTTGTGGATTCAGGG	60	20	132	81760	81891	AGACCTGGTCCTTTTACCCG	60.004	20	CCGGTACTTGTGGATTCAGG	60	20	133	81760	81892
NC_029944.1	68	p1	(T)11	11	122830	122840	CTGGTCCTTTTACCCGGACT	60.004	20	CCGGTACTTGTGGATTCAGG	60	20	129	81764	81892	AGACCTGGTCCTTTTACCCG	60.004	20	CGGTACTTGTGGATTCAGGG	60	20	132	81760	81891	AGACCTGGTCCTTTTACCCG	60.004	20	CCGGTACTTGTGGATTCAGG	60	20	133	81760	81892
NC_029944.1	69	p1	(A)13	13	125261	125273	CTGGTCCTTTTACCCGGACT	60.004	20	CCGGTACTTGTGGATTCAGG	60	20	129	81764	81892	AGACCTGGTCCTTTTACCCG	60.004	20	CGGTACTTGTGGATTCAGGG	60	20	132	81760	81891	AGACCTGGTCCTTTTACCCG	60.004	20	CCGGTACTTGTGGATTCAGG	60	20	133	81760	81892
NC_029944.1	70	p1	(T)11	11	128037	128047	CTGGTCCTTTTACCCGGACT	60.004	20	CCGGTACTTGTGGATTCAGG	60	20	129	81764	81892	AGACCTGGTCCTTTTACCCG	60.004	20	CGGTACTTGTGGATTCAGGG	60	20	132	81760	81891	AGACCTGGTCCTTTTACCCG	60.004	20	CCGGTACTTGTGGATTCAGG	60	20	133	81760	81892
NC_029944.1	71	p1	(A)13	13	131807	131819	CTGGTCCTTTTACCCGGACT	60.004	20	CCGGTACTTGTGGATTCAGG	60	20	129	81764	81892	AGACCTGGTCCTTTTACCCG	60.004	20	CGGTACTTGTGGATTCAGGG	60	20	132	81760	81891	AGACCTGGTCCTTTTACCCG	60.004	20	CCGGTACTTGTGGATTCAGG	60	20	133	81760	81892
NC_029944.1	72	p1	(T)13	13	133383	133395	CTGGTCCTTTTACCCGGACT	60.004	20	CCGGTACTTGTGGATTCAGG	60	20	129	81764	81892	AGACCTGGTCCTTTTACCCG	60.004	20	CGGTACTTGTGGATTCAGGG	60	20	132	81760	81891	AGACCTGGTCCTTTTACCCG	60.004	20	CCGGTACTTGTGGATTCAGG	60	20	133	81760	81892
NC_029944.1	73	p1	(T)10	10	154074	154083	CTGGTCCTTTTACCCGGACT	60.004	20	CCGGTACTTGTGGATTCAGG	60	20	129	81764	81892	AGACCTGGTCCTTTTACCCG	60.004	20	CGGTACTTGTGGATTCAGGG	60	20	132	81760	81891	AGACCTGGTCCTTTTACCCG	60.004	20	CCGGTACTTGTGGATTCAGG	60	20	133	81760	81892
NC_030063.1	1	p1	(A)11	11	3716	3726	CGGTACTTGTGGATTCAGGG	60	20	TGGTAGAGGGGTTACGTCCA	60	20	211	159908	160118	CCGGTACTTGTGGATTCAGG	60	20	TGGTAGAGGGGTTACGTCCA	60	20	212	159907	160118	TGGTAGAGGGGTTACGTCCA	60	20	CGGTACTTGTGGATTCAGGG	60	20	211	80347	80557
NC_030063.1	2	p1	(A)15	15	4474	4488	CGGTACTTGTGGATTCAGGG	60	20	TGGTAGAGGGGTTACGTCCA	60	20	211	159908	160118	CCGGTACTTGTGGATTCAGG	60	20	TGGTAGAGGGGTTACGTCCA	60	20	212	159907	160118	TGGTAGAGGGGTTACGTCCA	60	20	CGGTACTTGTGGATTCAGGG	60	20	211	80347	80557
NC_030063.1	3	p1	(A)11	11	4619	4629	CGGTACTTGTGGATTCAGGG	60	20	TGGTAGAGGGGTTACGTCCA	60	20	211	159908	160118	CCGGTACTTGTGGATTCAGG	60	20	TGGTAGAGGGGTTACGTCCA	60	20	212	159907	160118	TGGTAGAGGGGTTACGTCCA	60	20	CGGTACTTGTGGATTCAGGG	60	20	211	80347	80557
NC_030063.1	4	p1	(T)14	14	4902	4915	CGGTACTTGTGGATTCAGGG	60	20	TGGTAGAGGGGTTACGTCCA	60	20	211	159908	160118	CCGGTACTTGTGGATTCAGG	60	20	TGGTAGAGGGGTTACGTCCA	60	20	212	159907	160118	TGGTAGAGGGGTTACGTCCA	60	20	CGGTACTTGTGGATTCAGGG	60	20	211	80347	80557
NC_030063.1	5	p1	(T)10	10	5662	5671	CGGTACTTGTGGATTCAGGG	60	20	TGGTAGAGGGGTTACGTCCA	60	20	211	159908	160118	CCGGTACTTGTGGATTCAGG	60	20	TGGTAGAGGGGTTACGTCCA	60	20	212	159907	160118	TGGTAGAGGGGTTACGTCCA	60	20	CGGTACTTGTGGATTCAGGG	60	20	211	80347	80557
NC_030063.1	6	p1	(T)15	15	6940	6954	CGGTACTTGTGGATTCAGGG	60	20	TGGTAGAGGGGTTACGTCCA	60	20	211	159908	160118	CCGGTACTTGTGGATTCAGG	60	20	TGGTAGAGGGGTTACGTCCA	60	20	212	159907	160118	TGGTAGAGGGGTTACGTCCA	60	20	CGGTACTTGTGGATTCAGGG	60	20	211	80347	80557
NC_030063.1	7	p1	(T)14	14	7874	7887	CGGTACTTGTGGATTCAGGG	60	20	TGGTAGAGGGGTTACGTCCA	60	20	211	159908	160118	CCGGTACTTGTGGATTCAGG	60	20	TGGTAGAGGGGTTACGTCCA	60	20	212	159907	160118	TGGTAGAGGGGTTACGTCCA	60	20	CGGTACTTGTGGATTCAGGG	60	20	211	80347	80557
NC_030063.1	8	p1	(A)10	10	8017	8026	CGGTACTTGTGGATTCAGGG	60	20	TGGTAGAGGGGTTACGTCCA	60	20	211	159908	160118	CCGGTACTTGTGGATTCAGG	60	20	TGGTAGAGGGGTTACGTCCA	60	20	212	159907	160118	TGGTAGAGGGGTTACGTCCA	60	20	CGGTACTTGTGGATTCAGGG	60	20	211	80347	80557
NC_030063.1	9	p1	(A)10	10	8190	8199	CGGTACTTGTGGATTCAGGG	60	20	TGGTAGAGGGGTTACGTCCA	60	20	211	159908	160118	CCGGTACTTGTGGATTCAGG	60	20	TGGTAGAGGGGTTACGTCCA	60	20	212	159907	160118	TGGTAGAGGGGTTACGTCCA	60	20	CGGTACTTGTGGATTCAGGG	60	20	211	80347	80557
NC_030063.1	10	p1	(T)13	13	8456	8468	CGGTACTTGTGGATTCAGGG	60	20	TGGTAGAGGGGTTACGTCCA	60	20	211	159908	160118	CCGGTACTTGTGGATTCAGG	60	20	TGGTAGAGGGGTTACGTCCA	60	20	212	159907	160118	TGGTAGAGGGGTTACGTCCA	60	20	CGGTACTTGTGGATTCAGGG	60	20	211	80347	80557
NC_030063.1	11	p1	(T)11	11	8980	8990	CGGTACTTGTGGATTCAGGG	60	20	TGGTAGAGGGGTTACGTCCA	60	20	211	159908	160118	CCGGTACTTGTGGATTCAGG	60	20	TGGTAGAGGGGTTACGTCCA	60	20	212	159907	160118	TGGTAGAGGGGTTACGTCCA	60	20	CGGTACTTGTGGATTCAGGG	60	20	211	80347	80557
NC_030063.1	12	p3	(TAT)5	15	9637	9651	CGGTACTTGTGGATTCAGGG	60	20	TGGTAGAGGGGTTACGTCCA	60	20	211	159908	160118	CCGGTACTTGTGGATTCAGG	60	20	TGGTAGAGGGGTTACGTCCA	60	20	212	159907	160118	TGGTAGAGGGGTTACGTCCA	60	20	CGGTACTTGTGGATTCAGGG	60	20	211	80347	80557
NC_030063.1	13	p1	(A)14	14	13212	13225	CGGTACTTGTGGATTCAGGG	60	20	TGGTAGAGGGGTTACGTCCA	60	20	211	159908	160118	CCGGTACTTGTGGATTCAGG	60	20	TGGTAGAGGGGTTACGTCCA	60	20	212	159907	160118	TGGTAGAGGGGTTACGTCCA	60	20	CGGTACTTGTGGATTCAGGG	60	20	211	80347	80557
NC_030063.1	14	c	(T)15gaatctctttcc(T)10	37	14074	14110	CGGTACTTGTGGATTCAGGG	60	20	TGGTAGAGGGGTTACGTCCA	60	20	211	159908	160118	CCGGTACTTGTGGATTCAGG	60	20	TGGTAGAGGGGTTACGTCCA	60	20	212	159907	160118	TGGTAGAGGGGTTACGTCCA	60	20	CGGTACTTGTGGATTCAGGG	60	20	211	80347	80557
NC_030063.1	15	p1	(T)10	10	15683	15692	CGGTACTTGTGGATTCAGGG	60	20	TGGTAGAGGGGTTACGTCCA	60	20	211	159908	160118	CCGGTACTTGTGGATTCAGG	60	20	TGGTAGAGGGGTTACGTCCA	60	20	212	159907	160118	TGGTAGAGGGGTTACGTCCA	60	20	CGGTACTTGTGGATTCAGGG	60	20	211	80347	80557
NC_030063.1	16	p1	(T)14	14	18144	18157	CGGTACTTGTGGATTCAGGG	60	20	TGGTAGAGGGGTTACGTCCA	60	20	211	159908	160118	CCGGTACTTGTGGATTCAGG	60	20	TGGTAGAGGGGTTACGTCCA	60	20	212	159907	160118	TGGTAGAGGGGTTACGTCCA	60	20	CGGTACTTGTGGATTCAGGG	60	20	211	80347	80557
NC_030063.1	17	p1	(A)11	11	26735	26745	CGGTACTTGTGGATTCAGGG	60	20	TGGTAGAGGGGTTACGTCCA	60	20	211	159908	160118	CCGGTACTTGTGGATTCAGG	60	20	TGGTAGAGGGGTTACGTCCA	60	20	212	159907	160118	TGGTAGAGGGGTTACGTCCA	60	20	CGGTACTTGTGGATTCAGGG	60	20	211	80347	80557
NC_030063.1	18	p1	(T)13	13	28161	28173	CGGTACTTGTGGATTCAGGG	60	20	TGGTAGAGGGGTTACGTCCA	60	20	211	159908	160118	CCGGTACTTGTGGATTCAGG	60	20	TGGTAGAGGGGTTACGTCCA	60	20	212	159907	160118	TGGTAGAGGGGTTACGTCCA	60	20	CGGTACTTGTGGATTCAGGG	60	20	211	80347	80557
NC_030063.1	19	p1	(A)11	11	28961	28971	CGGTACTTGTGGATTCAGGG	60	20	TGGTAGAGGGGTTACGTCCA	60	20	211	159908	160118	CCGGTACTTGTGGATTCAGG	60	20	TGGTAGAGGGGTTACGTCCA	60	20	212	159907	160118	TGGTAGAGGGGTTACGTCCA	60	20	CGGTACTTGTGGATTCAGGG	60	20	211	80347	80557
NC_030063.1	20	p1	(T)10	10	29496	29505	CGGTACTTGTGGATTCAGGG	60	20	TGGTAGAGGGGTTACGTCCA	60	20	211	159908	160118	CCGGTACTTGTGGATTCAGG	60	20	TGGTAGAGGGGTTACGTCCA	60	20	212	159907	160118	TGGTAGAGGGGTTACGTCCA	60	20	CGGTACTTGTGGATTCAGGG	60	20	211	80347	80557
NC_030063.1	21	p1	(A)13	13	29876	29888	CGGTACTTGTGGATTCAGGG	60	20	TGGTAGAGGGGTTACGTCCA	60	20	211	159908	160118	CCGGTACTTGTGGATTCAGG	60	20	TGGTAGAGGGGTTACGTCCA	60	20	212	159907	160118	TGGTAGAGGGGTTACGTCCA	60	20	CGGTACTTGTGGATTCAGGG	60	20	211	80347	80557
NC_030063.1	22	p1	(T)20	20	30954	30973	CGGTACTTGTGGATTCAGGG	60	20	TGGTAGAGGGGTTACGTCCA	60	20	211	159908	160118	CCGGTACTTGTGGATTCAGG	60	20	TGGTAGAGGGGTTACGTCCA	60	20	212	159907	160118	TGGTAGAGGGGTTACGTCCA	60	20	CGGTACTTGTGGATTCAGGG	60	20	211	80347	80557
NC_030063.1	23	c	(T)12atttttcactcagggttcacaaaccattccctataattatatagaattaatgaagtataggatcccttcagggagtgatttgtccggc(A)14	114	31487	31600	CGGTACTTGTGGATTCAGGG	60	20	TGGTAGAGGGGTTACGTCCA	60	20	211	159908	160118	CCGGTACTTGTGGATTCAGG	60	20	TGGTAGAGGGGTTACGTCCA	60	20	212	159907	160118	TGGTAGAGGGGTTACGTCCA	60	20	CGGTACTTGTGGATTCAGGG	60	20	211	80347	80557
NC_030063.1	24	p1	(A)10	10	32486	32495	CGGTACTTGTGGATTCAGGG	60	20	TGGTAGAGGGGTTACGTCCA	60	20	211	159908	160118	CCGGTACTTGTGGATTCAGG	60	20	TGGTAGAGGGGTTACGTCCA	60	20	212	159907	160118	TGGTAGAGGGGTTACGTCCA	60	20	CGGTACTTGTGGATTCAGGG	60	20	211	80347	80557
NC_030063.1	25	p2	(AT)6	12	33123	33134	CGGTACTTGTGGATTCAGGG	60	20	TGGTAGAGGGGTTACGTCCA	60	20	211	159908	160118	CCGGTACTTGTGGATTCAGG	60	20	TGGTAGAGGGGTTACGTCCA	60	20	212	159907	160118	TGGTAGAGGGGTTACGTCCA	60	20	CGGTACTTGTGGATTCAGGG	60	20	211	80347	80557
NC_030063.1	26	p1	(A)16	16	36042	36057	CGGTACTTGTGGATTCAGGG	60	20	TGGTAGAGGGGTTACGTCCA	60	20	211	159908	160118	CCGGTACTTGTGGATTCAGG	60	20	TGGTAGAGGGGTTACGTCCA	60	20	212	159907	160118	TGGTAGAGGGGTTACGTCCA	60	20	CGGTACTTGTGGATTCAGGG	60	20	211	80347	80557
NC_030063.1	27	p1	(A)12	12	36936	36947	CGGTACTTGTGGATTCAGGG	60	20	TGGTAGAGGGGTTACGTCCA	60	20	211	159908	160118	CCGGTACTTGTGGATTCAGG	60	20	TGGTAGAGGGGTTACGTCCA	60	20	212	159907	160118	TGGTAGAGGGGTTACGTCCA	60	20	CGGTACTTGTGGATTCAGGG	60	20	211	80347	80557
NC_030063.1	28	p1	(T)10	10	42825	42834	CGGTACTTGTGGATTCAGGG	60	20	TGGTAGAGGGGTTACGTCCA	60	20	211	159908	160118	CCGGTACTTGTGGATTCAGG	60	20	TGGTAGAGGGGTTACGTCCA	60	20	212	159907	160118	TGGTAGAGGGGTTACGTCCA	60	20	CGGTACTTGTGGATTCAGGG	60	20	211	80347	80557
NC_030063.1	29	p1	(T)10	10	42966	42975	CGGTACTTGTGGATTCAGGG	60	20	TGGTAGAGGGGTTACGTCCA	60	20	211	159908	160118	CCGGTACTTGTGGATTCAGG	60	20	TGGTAGAGGGGTTACGTCCA	60	20	212	159907	160118	TGGTAGAGGGGTTACGTCCA	60	20	CGGTACTTGTGGATTCAGGG	60	20	211	80347	80557
NC_030063.1	30	p1	(T)10	10	43867	43876	CGGTACTTGTGGATTCAGGG	60	20	TGGTAGAGGGGTTACGTCCA	60	20	211	159908	160118	CCGGTACTTGTGGATTCAGG	60	20	TGGTAGAGGGGTTACGTCCA	60	20	212	159907	160118	TGGTAGAGGGGTTACGTCCA	60	20	CGGTACTTGTGGATTCAGGG	60	20	211	80347	80557
NC_030063.1	31	p1	(A)18	18	45122	45139	CGGTACTTGTGGATTCAGGG	60	20	TGGTAGAGGGGTTACGTCCA	60	20	211	159908	160118	CCGGTACTTGTGGATTCAGG	60	20	TGGTAGAGGGGTTACGTCCA	60	20	212	159907	160118	TGGTAGAGGGGTTACGTCCA	60	20	CGGTACTTGTGGATTCAGGG	60	20	211	80347	80557
NC_030063.1	32	p1	(T)11	11	47116	47126	CGGTACTTGTGGATTCAGGG	60	20	TGGTAGAGGGGTTACGTCCA	60	20	211	159908	160118	CCGGTACTTGTGGATTCAGG	60	20	TGGTAGAGGGGTTACGTCCA	60	20	212	159907	160118	TGGTAGAGGGGTTACGTCCA	60	20	CGGTACTTGTGGATTCAGGG	60	20	211	80347	80557
NC_030063.1	33	p1	(A)10	10	47241	47250	CGGTACTTGTGGATTCAGGG	60	20	TGGTAGAGGGGTTACGTCCA	60	20	211	159908	160118	CCGGTACTTGTGGATTCAGG	60	20	TGGTAGAGGGGTTACGTCCA	60	20	212	159907	160118	TGGTAGAGGGGTTACGTCCA	60	20	CGGTACTTGTGGATTCAGGG	60	20	211	80347	80557
NC_030063.1	34	p1	(A)11	11	47777	47787	CGGTACTTGTGGATTCAGGG	60	20	TGGTAGAGGGGTTACGTCCA	60	20	211	159908	160118	CCGGTACTTGTGGATTCAGG	60	20	TGGTAGAGGGGTTACGTCCA	60	20	212	159907	160118	TGGTAGAGGGGTTACGTCCA	60	20	CGGTACTTGTGGATTCAGGG	60	20	211	80347	80557
NC_030063.1	35	p1	(A)12	12	48271	48282	CGGTACTTGTGGATTCAGGG	60	20	TGGTAGAGGGGTTACGTCCA	60	20	211	159908	160118	CCGGTACTTGTGGATTCAGG	60	20	TGGTAGAGGGGTTACGTCCA	60	20	212	159907	160118	TGGTAGAGGGGTTACGTCCA	60	20	CGGTACTTGTGGATTCAGGG	60	20	211	80347	80557
NC_030063.1	36	p1	(A)10	10	48785	48794	CGGTACTTGTGGATTCAGGG	60	20	TGGTAGAGGGGTTACGTCCA	60	20	211	159908	160118	CCGGTACTTGTGGATTCAGG	60	20	TGGTAGAGGGGTTACGTCCA	60	20	212	159907	160118	TGGTAGAGGGGTTACGTCCA	60	20	CGGTACTTGTGGATTCAGGG	60	20	211	80347	80557
NC_030063.1	37	p1	(A)14	14	48946	48959	CGGTACTTGTGGATTCAGGG	60	20	TGGTAGAGGGGTTACGTCCA	60	20	211	159908	160118	CCGGTACTTGTGGATTCAGG	60	20	TGGTAGAGGGGTTACGTCCA	60	20	212	159907	160118	TGGTAGAGGGGTTACGTCCA	60	20	CGGTACTTGTGGATTCAGGG	60	20	211	80347	80557
NC_030063.1	38	p1	(T)17	17	49591	49607	CGGTACTTGTGGATTCAGGG	60	20	TGGTAGAGGGGTTACGTCCA	60	20	211	159908	160118	CCGGTACTTGTGGATTCAGG	60	20	TGGTAGAGGGGTTACGTCCA	60	20	212	159907	160118	TGGTAGAGGGGTTACGTCCA	60	20	CGGTACTTGTGGATTCAGGG	60	20	211	80347	80557
NC_030063.1	39	p1	(A)16	16	49724	49739	CGGTACTTGTGGATTCAGGG	60	20	TGGTAGAGGGGTTACGTCCA	60	20	211	159908	160118	CCGGTACTTGTGGATTCAGG	60	20	TGGTAGAGGGGTTACGTCCA	60	20	212	159907	160118	TGGTAGAGGGGTTACGTCCA	60	20	CGGTACTTGTGGATTCAGGG	60	20	211	80347	80557
NC_030063.1	40	p1	(T)16	16	52050	52065	CGGTACTTGTGGATTCAGGG	60	20	TGGTAGAGGGGTTACGTCCA	60	20	211	159908	160118	CCGGTACTTGTGGATTCAGG	60	20	TGGTAGAGGGGTTACGTCCA	60	20	212	159907	160118	TGGTAGAGGGGTTACGTCCA	60	20	CGGTACTTGTGGATTCAGGG	60	20	211	80347	80557
NC_030063.1	41	p1	(A)13	13	52179	52191	CGGTACTTGTGGATTCAGGG	60	20	TGGTAGAGGGGTTACGTCCA	60	20	211	159908	160118	CCGGTACTTGTGGATTCAGG	60	20	TGGTAGAGGGGTTACGTCCA	60	20	212	159907	160118	TGGTAGAGGGGTTACGTCCA	60	20	CGGTACTTGTGGATTCAGGG	60	20	211	80347	80557
NC_030063.1	42	p1	(T)14	14	52985	52998	CGGTACTTGTGGATTCAGGG	60	20	TGGTAGAGGGGTTACGTCCA	60	20	211	159908	160118	CCGGTACTTGTGGATTCAGG	60	20	TGGTAGAGGGGTTACGTCCA	60	20	212	159907	160118	TGGTAGAGGGGTTACGTCCA	60	20	CGGTACTTGTGGATTCAGGG	60	20	211	80347	80557
NC_030063.1	43	p1	(T)11	11	54150	54160	CGGTACTTGTGGATTCAGGG	60	20	TGGTAGAGGGGTTACGTCCA	60	20	211	159908	160118	CCGGTACTTGTGGATTCAGG	60	20	TGGTAGAGGGGTTACGTCCA	60	20	212	159907	160118	TGGTAGAGGGGTTACGTCCA	60	20	CGGTACTTGTGGATTCAGGG	60	20	211	80347	80557
NC_030063.1	44	p1	(T)12	12	60910	60921	CGGTACTTGTGGATTCAGGG	60	20	TGGTAGAGGGGTTACGTCCA	60	20	211	159908	160118	CCGGTACTTGTGGATTCAGG	60	20	TGGTAGAGGGGTTACGTCCA	60	20	212	159907	160118	TGGTAGAGGGGTTACGTCCA	60	20	CGGTACTTGTGGATTCAGGG	60	20	211	80347	80557
NC_030063.1	45	p1	(T)11	11	67273	67283	CGGTACTTGTGGATTCAGGG	60	20	TGGTAGAGGGGTTACGTCCA	60	20	211	159908	160118	CCGGTACTTGTGGATTCAGG	60	20	TGGTAGAGGGGTTACGTCCA	60	20	212	159907	160118	TGGTAGAGGGGTTACGTCCA	60	20	CGGTACTTGTGGATTCAGGG	60	20	211	80347	80557
NC_030063.1	46	p1	(T)12	12	67788	67799	CGGTACTTGTGGATTCAGGG	60	20	TGGTAGAGGGGTTACGTCCA	60	20	211	159908	160118	CCGGTACTTGTGGATTCAGG	60	20	TGGTAGAGGGGTTACGTCCA	60	20	212	159907	160118	TGGTAGAGGGGTTACGTCCA	60	20	CGGTACTTGTGGATTCAGGG	60	20	211	80347	80557
NC_030063.1	47	p1	(T)13	13	68565	68577	CGGTACTTGTGGATTCAGGG	60	20	TGGTAGAGGGGTTACGTCCA	60	20	211	159908	160118	CCGGTACTTGTGGATTCAGG	60	20	TGGTAGAGGGGTTACGTCCA	60	20	212	159907	160118	TGGTAGAGGGGTTACGTCCA	60	20	CGGTACTTGTGGATTCAGGG	60	20	211	80347	80557
NC_030063.1	48	p1	(T)12	12	71895	71906	CGGTACTTGTGGATTCAGGG	60	20	TGGTAGAGGGGTTACGTCCA	60	20	211	159908	160118	CCGGTACTTGTGGATTCAGG	60	20	TGGTAGAGGGGTTACGTCCA	60	20	212	159907	160118	TGGTAGAGGGGTTACGTCCA	60	20	CGGTACTTGTGGATTCAGGG	60	20	211	80347	80557
NC_030063.1	49	c	(A)13tggcaaagcaaagaaagaatcaaagtaaagtataggtcctc(T)14	68	72618	72685	CGGTACTTGTGGATTCAGGG	60	20	TGGTAGAGGGGTTACGTCCA	60	20	211	159908	160118	CCGGTACTTGTGGATTCAGG	60	20	TGGTAGAGGGGTTACGTCCA	60	20	212	159907	160118	TGGTAGAGGGGTTACGTCCA	60	20	CGGTACTTGTGGATTCAGGG	60	20	211	80347	80557
NC_030063.1	50	p1	(T)11	11	72909	72919	CGGTACTTGTGGATTCAGGG	60	20	TGGTAGAGGGGTTACGTCCA	60	20	211	159908	160118	CCGGTACTTGTGGATTCAGG	60	20	TGGTAGAGGGGTTACGTCCA	60	20	212	159907	160118	TGGTAGAGGGGTTACGTCCA	60	20	CGGTACTTGTGGATTCAGGG	60	20	211	80347	80557
NC_030063.1	51	p1	(T)11	11	73746	73756	CGGTACTTGTGGATTCAGGG	60	20	TGGTAGAGGGGTTACGTCCA	60	20	211	159908	160118	CCGGTACTTGTGGATTCAGG	60	20	TGGTAGAGGGGTTACGTCCA	60	20	212	159907	160118	TGGTAGAGGGGTTACGTCCA	60	20	CGGTACTTGTGGATTCAGGG	60	20	211	80347	80557
NC_030063.1	52	p1	(T)10	10	80879	80888	CGGTACTTGTGGATTCAGGG	60	20	TGGTAGAGGGGTTACGTCCA	60	20	211	159908	160118	CCGGTACTTGTGGATTCAGG	60	20	TGGTAGAGGGGTTACGTCCA	60	20	212	159907	160118	TGGTAGAGGGGTTACGTCCA	60	20	CGGTACTTGTGGATTCAGGG	60	20	211	80347	80557
NC_030063.1	53	p1	(A)11	11	81054	81064	CGGTACTTGTGGATTCAGGG	60	20	TGGTAGAGGGGTTACGTCCA	60	20	211	159908	160118	CCGGTACTTGTGGATTCAGG	60	20	TGGTAGAGGGGTTACGTCCA	60	20	212	159907	160118	TGGTAGAGGGGTTACGTCCA	60	20	CGGTACTTGTGGATTCAGGG	60	20	211	80347	80557
NC_030063.1	54	p1	(T)14	14	81961	81974	CGGTACTTGTGGATTCAGGG	60	20	TGGTAGAGGGGTTACGTCCA	60	20	211	159908	160118	CCGGTACTTGTGGATTCAGG	60	20	TGGTAGAGGGGTTACGTCCA	60	20	212	159907	160118	TGGTAGAGGGGTTACGTCCA	60	20	CGGTACTTGTGGATTCAGGG	60	20	211	80347	80557
NC_030063.1	55	p1	(T)13	13	83347	83359	CGGTACTTGTGGATTCAGGG	60	20	TGGTAGAGGGGTTACGTCCA	60	20	211	159908	160118	CCGGTACTTGTGGATTCAGG	60	20	TGGTAGAGGGGTTACGTCCA	60	20	212	159907	160118	TGGTAGAGGGGTTACGTCCA	60	20	CGGTACTTGTGGATTCAGGG	60	20	211	80347	80557
NC_030063.1	56	p1	(T)10	10	85409	85418	CGGTACTTGTGGATTCAGGG	60	20	TGGTAGAGGGGTTACGTCCA	60	20	211	159908	160118	CCGGTACTTGTGGATTCAGG	60	20	TGGTAGAGGGGTTACGTCCA	60	20	212	159907	160118	TGGTAGAGGGGTTACGTCCA	60	20	CGGTACTTGTGGATTCAGGG	60	20	211	80347	80557
NC_030063.1	57	p1	(A)10	10	109448	109457	CGGTACTTGTGGATTCAGGG	60	20	TGGTAGAGGGGTTACGTCCA	60	20	211	159908	160118	CCGGTACTTGTGGATTCAGG	60	20	TGGTAGAGGGGTTACGTCCA	60	20	212	159907	160118	TGGTAGAGGGGTTACGTCCA	60	20	CGGTACTTGTGGATTCAGGG	60	20	211	80347	80557
NC_030063.1	58	p1	(T)27	27	113741	113767	CGGTACTTGTGGATTCAGGG	60	20	TGGTAGAGGGGTTACGTCCA	60	20	211	159908	160118	CCGGTACTTGTGGATTCAGG	60	20	TGGTAGAGGGGTTACGTCCA	60	20	212	159907	160118	TGGTAGAGGGGTTACGTCCA	60	20	CGGTACTTGTGGATTCAGGG	60	20	211	80347	80557
NC_030063.1	59	p1	(A)12	12	115177	115188	CGGTACTTGTGGATTCAGGG	60	20	TGGTAGAGGGGTTACGTCCA	60	20	211	159908	160118	CCGGTACTTGTGGATTCAGG	60	20	TGGTAGAGGGGTTACGTCCA	60	20	212	159907	160118	TGGTAGAGGGGTTACGTCCA	60	20	CGGTACTTGTGGATTCAGGG	60	20	211	80347	80557
NC_030063.1	60	p2	(TG)7	14	116745	116758	CGGTACTTGTGGATTCAGGG	60	20	TGGTAGAGGGGTTACGTCCA	60	20	211	159908	160118	CCGGTACTTGTGGATTCAGG	60	20	TGGTAGAGGGGTTACGTCCA	60	20	212	159907	160118	TGGTAGAGGGGTTACGTCCA	60	20	CGGTACTTGTGGATTCAGGG	60	20	211	80347	80557
NC_030063.1	61	p1	(T)10	10	122050	122059	CGGTACTTGTGGATTCAGGG	60	20	TGGTAGAGGGGTTACGTCCA	60	20	211	159908	160118	CCGGTACTTGTGGATTCAGG	60	20	TGGTAGAGGGGTTACGTCCA	60	20	212	159907	160118	TGGTAGAGGGGTTACGTCCA	60	20	CGGTACTTGTGGATTCAGGG	60	20	211	80347	80557
NC_030063.1	62	p1	(A)14	14	122368	122381	CGGTACTTGTGGATTCAGGG	60	20	TGGTAGAGGGGTTACGTCCA	60	20	211	159908	160118	CCGGTACTTGTGGATTCAGG	60	20	TGGTAGAGGGGTTACGTCCA	60	20	212	159907	160118	TGGTAGAGGGGTTACGTCCA	60	20	CGGTACTTGTGGATTCAGGG	60	20	211	80347	80557
NC_030063.1	63	p1	(A)10	10	122632	122641	CGGTACTTGTGGATTCAGGG	60	20	TGGTAGAGGGGTTACGTCCA	60	20	211	159908	160118	CCGGTACTTGTGGATTCAGG	60	20	TGGTAGAGGGGTTACGTCCA	60	20	212	159907	160118	TGGTAGAGGGGTTACGTCCA	60	20	CGGTACTTGTGGATTCAGGG	60	20	211	80347	80557
NC_030063.1	64	p1	(T)11	11	124947	124957	CGGTACTTGTGGATTCAGGG	60	20	TGGTAGAGGGGTTACGTCCA	60	20	211	159908	160118	CCGGTACTTGTGGATTCAGG	60	20	TGGTAGAGGGGTTACGTCCA	60	20	212	159907	160118	TGGTAGAGGGGTTACGTCCA	60	20	CGGTACTTGTGGATTCAGGG	60	20	211	80347	80557
NC_030063.1	65	p1	(T)10	10	127882	127891	CGGTACTTGTGGATTCAGGG	60	20	TGGTAGAGGGGTTACGTCCA	60	20	211	159908	160118	CCGGTACTTGTGGATTCAGG	60	20	TGGTAGAGGGGTTACGTCCA	60	20	212	159907	160118	TGGTAGAGGGGTTACGTCCA	60	20	CGGTACTTGTGGATTCAGGG	60	20	211	80347	80557
NC_030063.1	66	p3	(CTT)9	27	129132	129158	CGGTACTTGTGGATTCAGGG	60	20	TGGTAGAGGGGTTACGTCCA	60	20	211	159908	160118	CCGGTACTTGTGGATTCAGG	60	20	TGGTAGAGGGGTTACGTCCA	60	20	212	159907	160118	TGGTAGAGGGGTTACGTCCA	60	20	CGGTACTTGTGGATTCAGGG	60	20	211	80347	80557
NC_030063.1	67	p1	(T)10	10	131010	131019	CGGTACTTGTGGATTCAGGG	60	20	TGGTAGAGGGGTTACGTCCA	60	20	211	159908	160118	CCGGTACTTGTGGATTCAGG	60	20	TGGTAGAGGGGTTACGTCCA	60	20	212	159907	160118	TGGTAGAGGGGTTACGTCCA	60	20	CGGTACTTGTGGATTCAGGG	60	20	211	80347	80557
NC_030063.1	68	p1	(A)10	10	155049	155058	CGGTACTTGTGGATTCAGGG	60	20	TGGTAGAGGGGTTACGTCCA	60	20	211	159908	160118	CCGGTACTTGTGGATTCAGG	60	20	TGGTAGAGGGGTTACGTCCA	60	20	212	159907	160118	TGGTAGAGGGGTTACGTCCA	60	20	CGGTACTTGTGGATTCAGGG	60	20	211	80347	80557
NC_030063.1	69	p1	(A)13	13	157108	157120	CGGTACTTGTGGATTCAGGG	60	20	TGGTAGAGGGGTTACGTCCA	60	20	211	159908	160118	CCGGTACTTGTGGATTCAGG	60	20	TGGTAGAGGGGTTACGTCCA	60	20	212	159907	160118	TGGTAGAGGGGTTACGTCCA	60	20	CGGTACTTGTGGATTCAGGG	60	20	211	80347	80557
NC_030063.1	70	p1	(A)14	14	158493	158506	CGGTACTTGTGGATTCAGGG	60	20	TGGTAGAGGGGTTACGTCCA	60	20	211	159908	160118	CCGGTACTTGTGGATTCAGG	60	20	TGGTAGAGGGGTTACGTCCA	60	20	212	159907	160118	TGGTAGAGGGGTTACGTCCA	60	20	CGGTACTTGTGGATTCAGGG	60	20	211	80347	80557
NC_030063.1	71	p1	(T)11	11	159403	159413	CGGTACTTGTGGATTCAGGG	60	20	TGGTAGAGGGGTTACGTCCA	60	20	211	159908	160118	CCGGTACTTGTGGATTCAGG	60	20	TGGTAGAGGGGTTACGTCCA	60	20	212	159907	160118	TGGTAGAGGGGTTACGTCCA	60	20	CGGTACTTGTGGATTCAGGG	60	20	211	80347	80557
NC_030063.1	72	p1	(A)10	10	159579	159588	CGGTACTTGTGGATTCAGGG	60	20	TGGTAGAGGGGTTACGTCCA	60	20	211	159908	160118	CCGGTACTTGTGGATTCAGG	60	20	TGGTAGAGGGGTTACGTCCA	60	20	212	159907	160118	TGGTAGAGGGGTTACGTCCA	60	20	CGGTACTTGTGGATTCAGGG	60	20	211	80347	80557
NC_030063.1	73	p1	(A)11	11	166711	166721	CGGTACTTGTGGATTCAGGG	60	20	TGGTAGAGGGGTTACGTCCA	60	20	211	159908	160118	CCGGTACTTGTGGATTCAGG	60	20	TGGTAGAGGGGTTACGTCCA	60	20	212	159907	160118	TGGTAGAGGGGTTACGTCCA	60	20	CGGTACTTGTGGATTCAGGG	60	20	211	80347	80557
NC_030062.1	1	p1	(A)17	17	3721	3737	CGGTACTTGTGGATTCAGGG	60	20	TGGTAGAGGGGTTACGTCCA	60	20	211	159784	159994	CCGGTACTTGTGGATTCAGG	60	20	TGGTAGAGGGGTTACGTCCA	60	20	212	159783	159994	TGGTAGAGGGGTTACGTCCA	60	20	CGGTACTTGTGGATTCAGGG	60	20	211	80240	80450
NC_030062.1	2	p1	(A)11	11	4485	4495	CGGTACTTGTGGATTCAGGG	60	20	TGGTAGAGGGGTTACGTCCA	60	20	211	159784	159994	CCGGTACTTGTGGATTCAGG	60	20	TGGTAGAGGGGTTACGTCCA	60	20	212	159783	159994	TGGTAGAGGGGTTACGTCCA	60	20	CGGTACTTGTGGATTCAGGG	60	20	211	80240	80450
NC_030062.1	3	p1	(A)10	10	4626	4635	CGGTACTTGTGGATTCAGGG	60	20	TGGTAGAGGGGTTACGTCCA	60	20	211	159784	159994	CCGGTACTTGTGGATTCAGG	60	20	TGGTAGAGGGGTTACGTCCA	60	20	212	159783	159994	TGGTAGAGGGGTTACGTCCA	60	20	CGGTACTTGTGGATTCAGGG	60	20	211	80240	80450
NC_030062.1	4	p1	(T)15	15	4908	4922	CGGTACTTGTGGATTCAGGG	60	20	TGGTAGAGGGGTTACGTCCA	60	20	211	159784	159994	CCGGTACTTGTGGATTCAGG	60	20	TGGTAGAGGGGTTACGTCCA	60	20	212	159783	159994	TGGTAGAGGGGTTACGTCCA	60	20	CGGTACTTGTGGATTCAGGG	60	20	211	80240	80450
NC_030062.1	5	p1	(T)10	10	5668	5677	CGGTACTTGTGGATTCAGGG	60	20	TGGTAGAGGGGTTACGTCCA	60	20	211	159784	159994	CCGGTACTTGTGGATTCAGG	60	20	TGGTAGAGGGGTTACGTCCA	60	20	212	159783	159994	TGGTAGAGGGGTTACGTCCA	60	20	CGGTACTTGTGGATTCAGGG	60	20	211	80240	80450
NC_030062.1	6	p1	(T)17	17	6946	6962	CGGTACTTGTGGATTCAGGG	60	20	TGGTAGAGGGGTTACGTCCA	60	20	211	159784	159994	CCGGTACTTGTGGATTCAGG	60	20	TGGTAGAGGGGTTACGTCCA	60	20	212	159783	159994	TGGTAGAGGGGTTACGTCCA	60	20	CGGTACTTGTGGATTCAGGG	60	20	211	80240	80450
NC_030062.1	7	p1	(T)12	12	7882	7893	CGGTACTTGTGGATTCAGGG	60	20	TGGTAGAGGGGTTACGTCCA	60	20	211	159784	159994	CCGGTACTTGTGGATTCAGG	60	20	TGGTAGAGGGGTTACGTCCA	60	20	212	159783	159994	TGGTAGAGGGGTTACGTCCA	60	20	CGGTACTTGTGGATTCAGGG	60	20	211	80240	80450
NC_030062.1	8	p1	(A)10	10	8195	8204	CGGTACTTGTGGATTCAGGG	60	20	TGGTAGAGGGGTTACGTCCA	60	20	211	159784	159994	CCGGTACTTGTGGATTCAGG	60	20	TGGTAGAGGGGTTACGTCCA	60	20	212	159783	159994	TGGTAGAGGGGTTACGTCCA	60	20	CGGTACTTGTGGATTCAGGG	60	20	211	80240	80450
NC_030062.1	9	p1	(T)11	11	8461	8471	CGGTACTTGTGGATTCAGGG	60	20	TGGTAGAGGGGTTACGTCCA	60	20	211	159784	159994	CCGGTACTTGTGGATTCAGG	60	20	TGGTAGAGGGGTTACGTCCA	60	20	212	159783	159994	TGGTAGAGGGGTTACGTCCA	60	20	CGGTACTTGTGGATTCAGGG	60	20	211	80240	80450
NC_030062.1	10	p1	(T)10	10	8983	8992	CGGTACTTGTGGATTCAGGG	60	20	TGGTAGAGGGGTTACGTCCA	60	20	211	159784	159994	CCGGTACTTGTGGATTCAGG	60	20	TGGTAGAGGGGTTACGTCCA	60	20	212	159783	159994	TGGTAGAGGGGTTACGTCCA	60	20	CGGTACTTGTGGATTCAGGG	60	20	211	80240	80450
NC_030062.1	11	p3	(TAT)5	15	9640	9654	CGGTACTTGTGGATTCAGGG	60	20	TGGTAGAGGGGTTACGTCCA	60	20	211	159784	159994	CCGGTACTTGTGGATTCAGG	60	20	TGGTAGAGGGGTTACGTCCA	60	20	212	159783	159994	TGGTAGAGGGGTTACGTCCA	60	20	CGGTACTTGTGGATTCAGGG	60	20	211	80240	80450
NC_030062.1	12	p1	(A)12	12	13215	13226	CGGTACTTGTGGATTCAGGG	60	20	TGGTAGAGGGGTTACGTCCA	60	20	211	159784	159994	CCGGTACTTGTGGATTCAGG	60	20	TGGTAGAGGGGTTACGTCCA	60	20	212	159783	159994	TGGTAGAGGGGTTACGTCCA	60	20	CGGTACTTGTGGATTCAGGG	60	20	211	80240	80450
NC_030062.1	13	c	(T)16gaatctctttcc(T)10	38	14075	14112	CGGTACTTGTGGATTCAGGG	60	20	TGGTAGAGGGGTTACGTCCA	60	20	211	159784	159994	CCGGTACTTGTGGATTCAGG	60	20	TGGTAGAGGGGTTACGTCCA	60	20	212	159783	159994	TGGTAGAGGGGTTACGTCCA	60	20	CGGTACTTGTGGATTCAGGG	60	20	211	80240	80450
NC_030062.1	14	p1	(T)10	10	15685	15694	CGGTACTTGTGGATTCAGGG	60	20	TGGTAGAGGGGTTACGTCCA	60	20	211	159784	159994	CCGGTACTTGTGGATTCAGG	60	20	TGGTAGAGGGGTTACGTCCA	60	20	212	159783	159994	TGGTAGAGGGGTTACGTCCA	60	20	CGGTACTTGTGGATTCAGGG	60	20	211	80240	80450
NC_030062.1	15	p1	(T)14	14	18141	18154	CGGTACTTGTGGATTCAGGG	60	20	TGGTAGAGGGGTTACGTCCA	60	20	211	159784	159994	CCGGTACTTGTGGATTCAGG	60	20	TGGTAGAGGGGTTACGTCCA	60	20	212	159783	159994	TGGTAGAGGGGTTACGTCCA	60	20	CGGTACTTGTGGATTCAGGG	60	20	211	80240	80450
NC_030062.1	16	p1	(A)12	12	26732	26743	CGGTACTTGTGGATTCAGGG	60	20	TGGTAGAGGGGTTACGTCCA	60	20	211	159784	159994	CCGGTACTTGTGGATTCAGG	60	20	TGGTAGAGGGGTTACGTCCA	60	20	212	159783	159994	TGGTAGAGGGGTTACGTCCA	60	20	CGGTACTTGTGGATTCAGGG	60	20	211	80240	80450
NC_030062.1	17	p1	(T)13	13	28159	28171	CGGTACTTGTGGATTCAGGG	60	20	TGGTAGAGGGGTTACGTCCA	60	20	211	159784	159994	CCGGTACTTGTGGATTCAGG	60	20	TGGTAGAGGGGTTACGTCCA	60	20	212	159783	159994	TGGTAGAGGGGTTACGTCCA	60	20	CGGTACTTGTGGATTCAGGG	60	20	211	80240	80450
NC_030062.1	18	p1	(A)11	11	28959	28969	CGGTACTTGTGGATTCAGGG	60	20	TGGTAGAGGGGTTACGTCCA	60	20	211	159784	159994	CCGGTACTTGTGGATTCAGG	60	20	TGGTAGAGGGGTTACGTCCA	60	20	212	159783	159994	TGGTAGAGGGGTTACGTCCA	60	20	CGGTACTTGTGGATTCAGGG	60	20	211	80240	80450
NC_030062.1	19	p1	(T)10	10	29494	29503	CGGTACTTGTGGATTCAGGG	60	20	TGGTAGAGGGGTTACGTCCA	60	20	211	159784	159994	CCGGTACTTGTGGATTCAGG	60	20	TGGTAGAGGGGTTACGTCCA	60	20	212	159783	159994	TGGTAGAGGGGTTACGTCCA	60	20	CGGTACTTGTGGATTCAGGG	60	20	211	80240	80450
NC_030062.1	20	p1	(A)12	12	29874	29885	CGGTACTTGTGGATTCAGGG	60	20	TGGTAGAGGGGTTACGTCCA	60	20	211	159784	159994	CCGGTACTTGTGGATTCAGG	60	20	TGGTAGAGGGGTTACGTCCA	60	20	212	159783	159994	TGGTAGAGGGGTTACGTCCA	60	20	CGGTACTTGTGGATTCAGGG	60	20	211	80240	80450
NC_030062.1	21	p1	(T)18	18	30951	30968	CGGTACTTGTGGATTCAGGG	60	20	TGGTAGAGGGGTTACGTCCA	60	20	211	159784	159994	CCGGTACTTGTGGATTCAGG	60	20	TGGTAGAGGGGTTACGTCCA	60	20	212	159783	159994	TGGTAGAGGGGTTACGTCCA	60	20	CGGTACTTGTGGATTCAGGG	60	20	211	80240	80450
NC_030062.1	22	c	(T)10gatttttcactcagggttcacaaaccattccctataattatatagaattaatgaagtataggatcccttcagggagtgatttgtccggc(A)13	112	31488	31599	CGGTACTTGTGGATTCAGGG	60	20	TGGTAGAGGGGTTACGTCCA	60	20	211	159784	159994	CCGGTACTTGTGGATTCAGG	60	20	TGGTAGAGGGGTTACGTCCA	60	20	212	159783	159994	TGGTAGAGGGGTTACGTCCA	60	20	CGGTACTTGTGGATTCAGGG	60	20	211	80240	80450
NC_030062.1	23	p1	(A)11	11	32485	32495	CGGTACTTGTGGATTCAGGG	60	20	TGGTAGAGGGGTTACGTCCA	60	20	211	159784	159994	CCGGTACTTGTGGATTCAGG	60	20	TGGTAGAGGGGTTACGTCCA	60	20	212	159783	159994	TGGTAGAGGGGTTACGTCCA	60	20	CGGTACTTGTGGATTCAGGG	60	20	211	80240	80450
NC_030062.1	24	p2	(AT)6	12	33123	33134	CGGTACTTGTGGATTCAGGG	60	20	TGGTAGAGGGGTTACGTCCA	60	20	211	159784	159994	CCGGTACTTGTGGATTCAGG	60	20	TGGTAGAGGGGTTACGTCCA	60	20	212	159783	159994	TGGTAGAGGGGTTACGTCCA	60	20	CGGTACTTGTGGATTCAGGG	60	20	211	80240	80450
NC_030062.1	25	p1	(A)15	15	36042	36056	CGGTACTTGTGGATTCAGGG	60	20	TGGTAGAGGGGTTACGTCCA	60	20	211	159784	159994	CCGGTACTTGTGGATTCAGG	60	20	TGGTAGAGGGGTTACGTCCA	60	20	212	159783	159994	TGGTAGAGGGGTTACGTCCA	60	20	CGGTACTTGTGGATTCAGGG	60	20	211	80240	80450
NC_030062.1	26	p1	(A)10	10	36935	36944	CGGTACTTGTGGATTCAGGG	60	20	TGGTAGAGGGGTTACGTCCA	60	20	211	159784	159994	CCGGTACTTGTGGATTCAGG	60	20	TGGTAGAGGGGTTACGTCCA	60	20	212	159783	159994	TGGTAGAGGGGTTACGTCCA	60	20	CGGTACTTGTGGATTCAGGG	60	20	211	80240	80450
NC_030062.1	27	p1	(T)10	10	42822	42831	CGGTACTTGTGGATTCAGGG	60	20	TGGTAGAGGGGTTACGTCCA	60	20	211	159784	159994	CCGGTACTTGTGGATTCAGG	60	20	TGGTAGAGGGGTTACGTCCA	60	20	212	159783	159994	TGGTAGAGGGGTTACGTCCA	60	20	CGGTACTTGTGGATTCAGGG	60	20	211	80240	80450
NC_030062.1	28	p1	(T)10	10	42963	42972	CGGTACTTGTGGATTCAGGG	60	20	TGGTAGAGGGGTTACGTCCA	60	20	211	159784	159994	CCGGTACTTGTGGATTCAGG	60	20	TGGTAGAGGGGTTACGTCCA	60	20	212	159783	159994	TGGTAGAGGGGTTACGTCCA	60	20	CGGTACTTGTGGATTCAGGG	60	20	211	80240	80450
NC_030062.1	29	p1	(A)15	15	45118	45132	CGGTACTTGTGGATTCAGGG	60	20	TGGTAGAGGGGTTACGTCCA	60	20	211	159784	159994	CCGGTACTTGTGGATTCAGG	60	20	TGGTAGAGGGGTTACGTCCA	60	20	212	159783	159994	TGGTAGAGGGGTTACGTCCA	60	20	CGGTACTTGTGGATTCAGGG	60	20	211	80240	80450
NC_030062.1	30	p1	(T)11	11	47109	47119	CGGTACTTGTGGATTCAGGG	60	20	TGGTAGAGGGGTTACGTCCA	60	20	211	159784	159994	CCGGTACTTGTGGATTCAGG	60	20	TGGTAGAGGGGTTACGTCCA	60	20	212	159783	159994	TGGTAGAGGGGTTACGTCCA	60	20	CGGTACTTGTGGATTCAGGG	60	20	211	80240	80450
NC_030062.1	31	p1	(A)11	11	47233	47243	CGGTACTTGTGGATTCAGGG	60	20	TGGTAGAGGGGTTACGTCCA	60	20	211	159784	159994	CCGGTACTTGTGGATTCAGG	60	20	TGGTAGAGGGGTTACGTCCA	60	20	212	159783	159994	TGGTAGAGGGGTTACGTCCA	60	20	CGGTACTTGTGGATTCAGGG	60	20	211	80240	80450
NC_030062.1	32	p1	(A)12	12	47770	47781	CGGTACTTGTGGATTCAGGG	60	20	TGGTAGAGGGGTTACGTCCA	60	20	211	159784	159994	CCGGTACTTGTGGATTCAGG	60	20	TGGTAGAGGGGTTACGTCCA	60	20	212	159783	159994	TGGTAGAGGGGTTACGTCCA	60	20	CGGTACTTGTGGATTCAGGG	60	20	211	80240	80450
NC_030062.1	33	p1	(A)11	11	48265	48275	CGGTACTTGTGGATTCAGGG	60	20	TGGTAGAGGGGTTACGTCCA	60	20	211	159784	159994	CCGGTACTTGTGGATTCAGG	60	20	TGGTAGAGGGGTTACGTCCA	60	20	212	159783	159994	TGGTAGAGGGGTTACGTCCA	60	20	CGGTACTTGTGGATTCAGGG	60	20	211	80240	80450
NC_030062.1	34	p1	(A)10	10	48779	48788	CGGTACTTGTGGATTCAGGG	60	20	TGGTAGAGGGGTTACGTCCA	60	20	211	159784	159994	CCGGTACTTGTGGATTCAGG	60	20	TGGTAGAGGGGTTACGTCCA	60	20	212	159783	159994	TGGTAGAGGGGTTACGTCCA	60	20	CGGTACTTGTGGATTCAGGG	60	20	211	80240	80450
NC_030062.1	35	p1	(A)14	14	48940	48953	CGGTACTTGTGGATTCAGGG	60	20	TGGTAGAGGGGTTACGTCCA	60	20	211	159784	159994	CCGGTACTTGTGGATTCAGG	60	20	TGGTAGAGGGGTTACGTCCA	60	20	212	159783	159994	TGGTAGAGGGGTTACGTCCA	60	20	CGGTACTTGTGGATTCAGGG	60	20	211	80240	80450
NC_030062.1	36	p1	(T)16	16	49585	49600	CGGTACTTGTGGATTCAGGG	60	20	TGGTAGAGGGGTTACGTCCA	60	20	211	159784	159994	CCGGTACTTGTGGATTCAGG	60	20	TGGTAGAGGGGTTACGTCCA	60	20	212	159783	159994	TGGTAGAGGGGTTACGTCCA	60	20	CGGTACTTGTGGATTCAGGG	60	20	211	80240	80450
NC_030062.1	37	p1	(A)17	17	49717	49733	CGGTACTTGTGGATTCAGGG	60	20	TGGTAGAGGGGTTACGTCCA	60	20	211	159784	159994	CCGGTACTTGTGGATTCAGG	60	20	TGGTAGAGGGGTTACGTCCA	60	20	212	159783	159994	TGGTAGAGGGGTTACGTCCA	60	20	CGGTACTTGTGGATTCAGGG	60	20	211	80240	80450
NC_030062.1	38	p1	(T)15	15	52044	52058	CGGTACTTGTGGATTCAGGG	60	20	TGGTAGAGGGGTTACGTCCA	60	20	211	159784	159994	CCGGTACTTGTGGATTCAGG	60	20	TGGTAGAGGGGTTACGTCCA	60	20	212	159783	159994	TGGTAGAGGGGTTACGTCCA	60	20	CGGTACTTGTGGATTCAGGG	60	20	211	80240	80450
NC_030062.1	39	p1	(A)13	13	52172	52184	CGGTACTTGTGGATTCAGGG	60	20	TGGTAGAGGGGTTACGTCCA	60	20	211	159784	159994	CCGGTACTTGTGGATTCAGG	60	20	TGGTAGAGGGGTTACGTCCA	60	20	212	159783	159994	TGGTAGAGGGGTTACGTCCA	60	20	CGGTACTTGTGGATTCAGGG	60	20	211	80240	80450
NC_030062.1	40	p1	(T)14	14	52978	52991	CGGTACTTGTGGATTCAGGG	60	20	TGGTAGAGGGGTTACGTCCA	60	20	211	159784	159994	CCGGTACTTGTGGATTCAGG	60	20	TGGTAGAGGGGTTACGTCCA	60	20	212	159783	159994	TGGTAGAGGGGTTACGTCCA	60	20	CGGTACTTGTGGATTCAGGG	60	20	211	80240	80450
NC_030062.1	41	p1	(T)10	10	54143	54152	CGGTACTTGTGGATTCAGGG	60	20	TGGTAGAGGGGTTACGTCCA	60	20	211	159784	159994	CCGGTACTTGTGGATTCAGG	60	20	TGGTAGAGGGGTTACGTCCA	60	20	212	159783	159994	TGGTAGAGGGGTTACGTCCA	60	20	CGGTACTTGTGGATTCAGGG	60	20	211	80240	80450
NC_030062.1	42	p1	(T)12	12	60797	60808	CGGTACTTGTGGATTCAGGG	60	20	TGGTAGAGGGGTTACGTCCA	60	20	211	159784	159994	CCGGTACTTGTGGATTCAGG	60	20	TGGTAGAGGGGTTACGTCCA	60	20	212	159783	159994	TGGTAGAGGGGTTACGTCCA	60	20	CGGTACTTGTGGATTCAGGG	60	20	211	80240	80450
NC_030062.1	43	p1	(T)12	12	67160	67171	CGGTACTTGTGGATTCAGGG	60	20	TGGTAGAGGGGTTACGTCCA	60	20	211	159784	159994	CCGGTACTTGTGGATTCAGG	60	20	TGGTAGAGGGGTTACGTCCA	60	20	212	159783	159994	TGGTAGAGGGGTTACGTCCA	60	20	CGGTACTTGTGGATTCAGGG	60	20	211	80240	80450
NC_030062.1	44	p1	(T)11	11	67676	67686	CGGTACTTGTGGATTCAGGG	60	20	TGGTAGAGGGGTTACGTCCA	60	20	211	159784	159994	CCGGTACTTGTGGATTCAGG	60	20	TGGTAGAGGGGTTACGTCCA	60	20	212	159783	159994	TGGTAGAGGGGTTACGTCCA	60	20	CGGTACTTGTGGATTCAGGG	60	20	211	80240	80450
NC_030062.1	45	p1	(A)10	10	68203	68212	CGGTACTTGTGGATTCAGGG	60	20	TGGTAGAGGGGTTACGTCCA	60	20	211	159784	159994	CCGGTACTTGTGGATTCAGG	60	20	TGGTAGAGGGGTTACGTCCA	60	20	212	159783	159994	TGGTAGAGGGGTTACGTCCA	60	20	CGGTACTTGTGGATTCAGGG	60	20	211	80240	80450
NC_030062.1	46	p1	(T)13	13	68453	68465	CGGTACTTGTGGATTCAGGG	60	20	TGGTAGAGGGGTTACGTCCA	60	20	211	159784	159994	CCGGTACTTGTGGATTCAGG	60	20	TGGTAGAGGGGTTACGTCCA	60	20	212	159783	159994	TGGTAGAGGGGTTACGTCCA	60	20	CGGTACTTGTGGATTCAGGG	60	20	211	80240	80450
NC_030062.1	47	p1	(T)13	13	71785	71797	CGGTACTTGTGGATTCAGGG	60	20	TGGTAGAGGGGTTACGTCCA	60	20	211	159784	159994	CCGGTACTTGTGGATTCAGG	60	20	TGGTAGAGGGGTTACGTCCA	60	20	212	159783	159994	TGGTAGAGGGGTTACGTCCA	60	20	CGGTACTTGTGGATTCAGGG	60	20	211	80240	80450
NC_030062.1	48	c	(A)14tggcaaagcaaagaaagaatcaaagtaaagtataggtcctc(T)14	69	72509	72577	CGGTACTTGTGGATTCAGGG	60	20	TGGTAGAGGGGTTACGTCCA	60	20	211	159784	159994	CCGGTACTTGTGGATTCAGG	60	20	TGGTAGAGGGGTTACGTCCA	60	20	212	159783	159994	TGGTAGAGGGGTTACGTCCA	60	20	CGGTACTTGTGGATTCAGGG	60	20	211	80240	80450
NC_030062.1	49	c	(T)10caa(T)10	23	72800	72822	CGGTACTTGTGGATTCAGGG	60	20	TGGTAGAGGGGTTACGTCCA	60	20	211	159784	159994	CCGGTACTTGTGGATTCAGG	60	20	TGGTAGAGGGGTTACGTCCA	60	20	212	159783	159994	TGGTAGAGGGGTTACGTCCA	60	20	CGGTACTTGTGGATTCAGGG	60	20	211	80240	80450
NC_030062.1	50	p1	(T)13	13	73637	73649	CGGTACTTGTGGATTCAGGG	60	20	TGGTAGAGGGGTTACGTCCA	60	20	211	159784	159994	CCGGTACTTGTGGATTCAGG	60	20	TGGTAGAGGGGTTACGTCCA	60	20	212	159783	159994	TGGTAGAGGGGTTACGTCCA	60	20	CGGTACTTGTGGATTCAGGG	60	20	211	80240	80450
NC_030062.1	51	p1	(T)10	10	80772	80781	CGGTACTTGTGGATTCAGGG	60	20	TGGTAGAGGGGTTACGTCCA	60	20	211	159784	159994	CCGGTACTTGTGGATTCAGG	60	20	TGGTAGAGGGGTTACGTCCA	60	20	212	159783	159994	TGGTAGAGGGGTTACGTCCA	60	20	CGGTACTTGTGGATTCAGGG	60	20	211	80240	80450
NC_030062.1	52	p1	(A)11	11	80947	80957	CGGTACTTGTGGATTCAGGG	60	20	TGGTAGAGGGGTTACGTCCA	60	20	211	159784	159994	CCGGTACTTGTGGATTCAGG	60	20	TGGTAGAGGGGTTACGTCCA	60	20	212	159783	159994	TGGTAGAGGGGTTACGTCCA	60	20	CGGTACTTGTGGATTCAGGG	60	20	211	80240	80450
NC_030062.1	53	p1	(T)14	14	81854	81867	CGGTACTTGTGGATTCAGGG	60	20	TGGTAGAGGGGTTACGTCCA	60	20	211	159784	159994	CCGGTACTTGTGGATTCAGG	60	20	TGGTAGAGGGGTTACGTCCA	60	20	212	159783	159994	TGGTAGAGGGGTTACGTCCA	60	20	CGGTACTTGTGGATTCAGGG	60	20	211	80240	80450
NC_030062.1	54	p1	(T)13	13	83240	83252	CGGTACTTGTGGATTCAGGG	60	20	TGGTAGAGGGGTTACGTCCA	60	20	211	159784	159994	CCGGTACTTGTGGATTCAGG	60	20	TGGTAGAGGGGTTACGTCCA	60	20	212	159783	159994	TGGTAGAGGGGTTACGTCCA	60	20	CGGTACTTGTGGATTCAGGG	60	20	211	80240	80450
NC_030062.1	55	p1	(T)10	10	85302	85311	CGGTACTTGTGGATTCAGGG	60	20	TGGTAGAGGGGTTACGTCCA	60	20	211	159784	159994	CCGGTACTTGTGGATTCAGG	60	20	TGGTAGAGGGGTTACGTCCA	60	20	212	159783	159994	TGGTAGAGGGGTTACGTCCA	60	20	CGGTACTTGTGGATTCAGGG	60	20	211	80240	80450
NC_030062.1	56	c	(A)10gaatgctttgaaaacaaaaaaaaagaatgctttgaaaac(A)11	60	109293	109352	CGGTACTTGTGGATTCAGGG	60	20	TGGTAGAGGGGTTACGTCCA	60	20	211	159784	159994	CCGGTACTTGTGGATTCAGG	60	20	TGGTAGAGGGGTTACGTCCA	60	20	212	159783	159994	TGGTAGAGGGGTTACGTCCA	60	20	CGGTACTTGTGGATTCAGGG	60	20	211	80240	80450
NC_030062.1	57	p1	(T)16	16	113614	113629	CGGTACTTGTGGATTCAGGG	60	20	TGGTAGAGGGGTTACGTCCA	60	20	211	159784	159994	CCGGTACTTGTGGATTCAGG	60	20	TGGTAGAGGGGTTACGTCCA	60	20	212	159783	159994	TGGTAGAGGGGTTACGTCCA	60	20	CGGTACTTGTGGATTCAGGG	60	20	211	80240	80450
NC_030062.1	58	p1	(A)13	13	115064	115076	CGGTACTTGTGGATTCAGGG	60	20	TGGTAGAGGGGTTACGTCCA	60	20	211	159784	159994	CCGGTACTTGTGGATTCAGG	60	20	TGGTAGAGGGGTTACGTCCA	60	20	212	159783	159994	TGGTAGAGGGGTTACGTCCA	60	20	CGGTACTTGTGGATTCAGGG	60	20	211	80240	80450
NC_030062.1	59	p2	(TG)7	14	116633	116646	CGGTACTTGTGGATTCAGGG	60	20	TGGTAGAGGGGTTACGTCCA	60	20	211	159784	159994	CCGGTACTTGTGGATTCAGG	60	20	TGGTAGAGGGGTTACGTCCA	60	20	212	159783	159994	TGGTAGAGGGGTTACGTCCA	60	20	CGGTACTTGTGGATTCAGGG	60	20	211	80240	80450
NC_030062.1	60	p1	(T)10	10	121937	121946	CGGTACTTGTGGATTCAGGG	60	20	TGGTAGAGGGGTTACGTCCA	60	20	211	159784	159994	CCGGTACTTGTGGATTCAGG	60	20	TGGTAGAGGGGTTACGTCCA	60	20	212	159783	159994	TGGTAGAGGGGTTACGTCCA	60	20	CGGTACTTGTGGATTCAGGG	60	20	211	80240	80450
NC_030062.1	61	p1	(A)15	15	122255	122269	CGGTACTTGTGGATTCAGGG	60	20	TGGTAGAGGGGTTACGTCCA	60	20	211	159784	159994	CCGGTACTTGTGGATTCAGG	60	20	TGGTAGAGGGGTTACGTCCA	60	20	212	159783	159994	TGGTAGAGGGGTTACGTCCA	60	20	CGGTACTTGTGGATTCAGGG	60	20	211	80240	80450
NC_030062.1	62	p1	(A)11	11	122520	122530	CGGTACTTGTGGATTCAGGG	60	20	TGGTAGAGGGGTTACGTCCA	60	20	211	159784	159994	CCGGTACTTGTGGATTCAGG	60	20	TGGTAGAGGGGTTACGTCCA	60	20	212	159783	159994	TGGTAGAGGGGTTACGTCCA	60	20	CGGTACTTGTGGATTCAGGG	60	20	211	80240	80450
NC_030062.1	63	p1	(T)11	11	124836	124846	CGGTACTTGTGGATTCAGGG	60	20	TGGTAGAGGGGTTACGTCCA	60	20	211	159784	159994	CCGGTACTTGTGGATTCAGG	60	20	TGGTAGAGGGGTTACGTCCA	60	20	212	159783	159994	TGGTAGAGGGGTTACGTCCA	60	20	CGGTACTTGTGGATTCAGGG	60	20	211	80240	80450
NC_030062.1	64	p1	(T)10	10	127771	127780	CGGTACTTGTGGATTCAGGG	60	20	TGGTAGAGGGGTTACGTCCA	60	20	211	159784	159994	CCGGTACTTGTGGATTCAGG	60	20	TGGTAGAGGGGTTACGTCCA	60	20	212	159783	159994	TGGTAGAGGGGTTACGTCCA	60	20	CGGTACTTGTGGATTCAGGG	60	20	211	80240	80450
NC_030062.1	65	p3	(CTT)9	27	129006	129032	CGGTACTTGTGGATTCAGGG	60	20	TGGTAGAGGGGTTACGTCCA	60	20	211	159784	159994	CCGGTACTTGTGGATTCAGG	60	20	TGGTAGAGGGGTTACGTCCA	60	20	212	159783	159994	TGGTAGAGGGGTTACGTCCA	60	20	CGGTACTTGTGGATTCAGGG	60	20	211	80240	80450
NC_030062.1	66	c	(T)11gttttcaaagcattctttttttttgttttcaaagcattc(T)10	60	130884	130943	CGGTACTTGTGGATTCAGGG	60	20	TGGTAGAGGGGTTACGTCCA	60	20	211	159784	159994	CCGGTACTTGTGGATTCAGG	60	20	TGGTAGAGGGGTTACGTCCA	60	20	212	159783	159994	TGGTAGAGGGGTTACGTCCA	60	20	CGGTACTTGTGGATTCAGGG	60	20	211	80240	80450
NC_030062.1	67	p1	(A)10	10	154925	154934	CGGTACTTGTGGATTCAGGG	60	20	TGGTAGAGGGGTTACGTCCA	60	20	211	159784	159994	CCGGTACTTGTGGATTCAGG	60	20	TGGTAGAGGGGTTACGTCCA	60	20	212	159783	159994	TGGTAGAGGGGTTACGTCCA	60	20	CGGTACTTGTGGATTCAGGG	60	20	211	80240	80450
NC_030062.1	68	p1	(A)13	13	156984	156996	CGGTACTTGTGGATTCAGGG	60	20	TGGTAGAGGGGTTACGTCCA	60	20	211	159784	159994	CCGGTACTTGTGGATTCAGG	60	20	TGGTAGAGGGGTTACGTCCA	60	20	212	159783	159994	TGGTAGAGGGGTTACGTCCA	60	20	CGGTACTTGTGGATTCAGGG	60	20	211	80240	80450
NC_030062.1	69	p1	(A)14	14	158369	158382	CGGTACTTGTGGATTCAGGG	60	20	TGGTAGAGGGGTTACGTCCA	60	20	211	159784	159994	CCGGTACTTGTGGATTCAGG	60	20	TGGTAGAGGGGTTACGTCCA	60	20	212	159783	159994	TGGTAGAGGGGTTACGTCCA	60	20	CGGTACTTGTGGATTCAGGG	60	20	211	80240	80450
NC_030062.1	70	p1	(T)11	11	159279	159289	CGGTACTTGTGGATTCAGGG	60	20	TGGTAGAGGGGTTACGTCCA	60	20	211	159784	159994	CCGGTACTTGTGGATTCAGG	60	20	TGGTAGAGGGGTTACGTCCA	60	20	212	159783	159994	TGGTAGAGGGGTTACGTCCA	60	20	CGGTACTTGTGGATTCAGGG	60	20	211	80240	80450
NC_030062.1	71	p1	(A)10	10	159455	159464	CGGTACTTGTGGATTCAGGG	60	20	TGGTAGAGGGGTTACGTCCA	60	20	211	159784	159994	CCGGTACTTGTGGATTCAGG	60	20	TGGTAGAGGGGTTACGTCCA	60	20	212	159783	159994	TGGTAGAGGGGTTACGTCCA	60	20	CGGTACTTGTGGATTCAGGG	60	20	211	80240	80450
NC_030062.1	72	p1	(A)13	13	166587	166599	CGGTACTTGTGGATTCAGGG	60	20	TGGTAGAGGGGTTACGTCCA	60	20	211	159784	159994	CCGGTACTTGTGGATTCAGG	60	20	TGGTAGAGGGGTTACGTCCA	60	20	212	159783	159994	TGGTAGAGGGGTTACGTCCA	60	20	CGGTACTTGTGGATTCAGGG	60	20	211	80240	80450
NC_030061.1	1	p1	(T)12	12	3338	3349	ATTGCATACGGCTCCACAAT	60.002	20	CTACCGAAAGGAAGGGTGGT	60.004	20	117	73679	73795	CTGGAGTTTGCTCCCAGAAA	60	20	TGAGTTTCTCGACCCTTTGC	60.007	20	256	143826	144081	TGAGTTTCTCGACCCTTTGC	60.007	20	CTGGAGTTTGCTCCCAGAAA	60	20	256	103971	104226
NC_030061.1	2	p1	(A)14	14	4253	4266	ATTGCATACGGCTCCACAAT	60.002	20	CTACCGAAAGGAAGGGTGGT	60.004	20	117	73679	73795	CTGGAGTTTGCTCCCAGAAA	60	20	TGAGTTTCTCGACCCTTTGC	60.007	20	256	143826	144081	TGAGTTTCTCGACCCTTTGC	60.007	20	CTGGAGTTTGCTCCCAGAAA	60	20	256	103971	104226
NC_030061.1	3	p1	(T)10	10	4938	4947	ATTGCATACGGCTCCACAAT	60.002	20	CTACCGAAAGGAAGGGTGGT	60.004	20	117	73679	73795	CTGGAGTTTGCTCCCAGAAA	60	20	TGAGTTTCTCGACCCTTTGC	60.007	20	256	143826	144081	TGAGTTTCTCGACCCTTTGC	60.007	20	CTGGAGTTTGCTCCCAGAAA	60	20	256	103971	104226
NC_030061.1	4	p1	(A)12	12	5152	5163	ATTGCATACGGCTCCACAAT	60.002	20	CTACCGAAAGGAAGGGTGGT	60.004	20	117	73679	73795	CTGGAGTTTGCTCCCAGAAA	60	20	TGAGTTTCTCGACCCTTTGC	60.007	20	256	143826	144081	TGAGTTTCTCGACCCTTTGC	60.007	20	CTGGAGTTTGCTCCCAGAAA	60	20	256	103971	104226
NC_030061.1	5	p1	(T)10	10	5450	5459	ATTGCATACGGCTCCACAAT	60.002	20	CTACCGAAAGGAAGGGTGGT	60.004	20	117	73679	73795	CTGGAGTTTGCTCCCAGAAA	60	20	TGAGTTTCTCGACCCTTTGC	60.007	20	256	143826	144081	TGAGTTTCTCGACCCTTTGC	60.007	20	CTGGAGTTTGCTCCCAGAAA	60	20	256	103971	104226
NC_030061.1	6	p1	(A)13	13	5985	5997	ATTGCATACGGCTCCACAAT	60.002	20	CTACCGAAAGGAAGGGTGGT	60.004	20	117	73679	73795	CTGGAGTTTGCTCCCAGAAA	60	20	TGAGTTTCTCGACCCTTTGC	60.007	20	256	143826	144081	TGAGTTTCTCGACCCTTTGC	60.007	20	CTGGAGTTTGCTCCCAGAAA	60	20	256	103971	104226
NC_030061.1	7	p1	(T)10	10	7239	7248	ATTGCATACGGCTCCACAAT	60.002	20	CTACCGAAAGGAAGGGTGGT	60.004	20	117	73679	73795	CTGGAGTTTGCTCCCAGAAA	60	20	TGAGTTTCTCGACCCTTTGC	60.007	20	256	143826	144081	TGAGTTTCTCGACCCTTTGC	60.007	20	CTGGAGTTTGCTCCCAGAAA	60	20	256	103971	104226
NC_030061.1	8	p1	(T)10	10	7602	7611	ATTGCATACGGCTCCACAAT	60.002	20	CTACCGAAAGGAAGGGTGGT	60.004	20	117	73679	73795	CTGGAGTTTGCTCCCAGAAA	60	20	TGAGTTTCTCGACCCTTTGC	60.007	20	256	143826	144081	TGAGTTTCTCGACCCTTTGC	60.007	20	CTGGAGTTTGCTCCCAGAAA	60	20	256	103971	104226
NC_030061.1	9	p1	(A)10	10	7838	7847	ATTGCATACGGCTCCACAAT	60.002	20	CTACCGAAAGGAAGGGTGGT	60.004	20	117	73679	73795	CTGGAGTTTGCTCCCAGAAA	60	20	TGAGTTTCTCGACCCTTTGC	60.007	20	256	143826	144081	TGAGTTTCTCGACCCTTTGC	60.007	20	CTGGAGTTTGCTCCCAGAAA	60	20	256	103971	104226
NC_030061.1	10	c	(A)12gaggttcaatattc(T)13	39	8738	8776	ATTGCATACGGCTCCACAAT	60.002	20	CTACCGAAAGGAAGGGTGGT	60.004	20	117	73679	73795	CTGGAGTTTGCTCCCAGAAA	60	20	TGAGTTTCTCGACCCTTTGC	60.007	20	256	143826	144081	TGAGTTTCTCGACCCTTTGC	60.007	20	CTGGAGTTTGCTCCCAGAAA	60	20	256	103971	104226
NC_030061.1	11	p1	(A)13	13	8976	8988	ATTGCATACGGCTCCACAAT	60.002	20	CTACCGAAAGGAAGGGTGGT	60.004	20	117	73679	73795	CTGGAGTTTGCTCCCAGAAA	60	20	TGAGTTTCTCGACCCTTTGC	60.007	20	256	143826	144081	TGAGTTTCTCGACCCTTTGC	60.007	20	CTGGAGTTTGCTCCCAGAAA	60	20	256	103971	104226
NC_030061.1	12	p1	(A)18	18	9203	9220	ATTGCATACGGCTCCACAAT	60.002	20	CTACCGAAAGGAAGGGTGGT	60.004	20	117	73679	73795	CTGGAGTTTGCTCCCAGAAA	60	20	TGAGTTTCTCGACCCTTTGC	60.007	20	256	143826	144081	TGAGTTTCTCGACCCTTTGC	60.007	20	CTGGAGTTTGCTCCCAGAAA	60	20	256	103971	104226
NC_030061.1	13	p1	(A)13	13	9335	9347	ATTGCATACGGCTCCACAAT	60.002	20	CTACCGAAAGGAAGGGTGGT	60.004	20	117	73679	73795	CTGGAGTTTGCTCCCAGAAA	60	20	TGAGTTTCTCGACCCTTTGC	60.007	20	256	143826	144081	TGAGTTTCTCGACCCTTTGC	60.007	20	CTGGAGTTTGCTCCCAGAAA	60	20	256	103971	104226
NC_030061.1	14	p1	(T)12	12	10507	10518	ATTGCATACGGCTCCACAAT	60.002	20	CTACCGAAAGGAAGGGTGGT	60.004	20	117	73679	73795	CTGGAGTTTGCTCCCAGAAA	60	20	TGAGTTTCTCGACCCTTTGC	60.007	20	256	143826	144081	TGAGTTTCTCGACCCTTTGC	60.007	20	CTGGAGTTTGCTCCCAGAAA	60	20	256	103971	104226
NC_030061.1	15	p1	(A)11	11	12342	12352	ATTGCATACGGCTCCACAAT	60.002	20	CTACCGAAAGGAAGGGTGGT	60.004	20	117	73679	73795	CTGGAGTTTGCTCCCAGAAA	60	20	TGAGTTTCTCGACCCTTTGC	60.007	20	256	143826	144081	TGAGTTTCTCGACCCTTTGC	60.007	20	CTGGAGTTTGCTCCCAGAAA	60	20	256	103971	104226
NC_030061.1	16	p1	(T)15	15	13050	13064	ATTGCATACGGCTCCACAAT	60.002	20	CTACCGAAAGGAAGGGTGGT	60.004	20	117	73679	73795	CTGGAGTTTGCTCCCAGAAA	60	20	TGAGTTTCTCGACCCTTTGC	60.007	20	256	143826	144081	TGAGTTTCTCGACCCTTTGC	60.007	20	CTGGAGTTTGCTCCCAGAAA	60	20	256	103971	104226
NC_030061.1	17	p1	(T)11	11	13717	13727	ATTGCATACGGCTCCACAAT	60.002	20	CTACCGAAAGGAAGGGTGGT	60.004	20	117	73679	73795	CTGGAGTTTGCTCCCAGAAA	60	20	TGAGTTTCTCGACCCTTTGC	60.007	20	256	143826	144081	TGAGTTTCTCGACCCTTTGC	60.007	20	CTGGAGTTTGCTCCCAGAAA	60	20	256	103971	104226
NC_030061.1	18	p1	(T)12	12	14936	14947	ATTGCATACGGCTCCACAAT	60.002	20	CTACCGAAAGGAAGGGTGGT	60.004	20	117	73679	73795	CTGGAGTTTGCTCCCAGAAA	60	20	TGAGTTTCTCGACCCTTTGC	60.007	20	256	143826	144081	TGAGTTTCTCGACCCTTTGC	60.007	20	CTGGAGTTTGCTCCCAGAAA	60	20	256	103971	104226
NC_030061.1	19	p1	(T)11	11	15346	15356	ATTGCATACGGCTCCACAAT	60.002	20	CTACCGAAAGGAAGGGTGGT	60.004	20	117	73679	73795	CTGGAGTTTGCTCCCAGAAA	60	20	TGAGTTTCTCGACCCTTTGC	60.007	20	256	143826	144081	TGAGTTTCTCGACCCTTTGC	60.007	20	CTGGAGTTTGCTCCCAGAAA	60	20	256	103971	104226
NC_030061.1	20	p1	(T)14	14	19372	19385	ATTGCATACGGCTCCACAAT	60.002	20	CTACCGAAAGGAAGGGTGGT	60.004	20	117	73679	73795	CTGGAGTTTGCTCCCAGAAA	60	20	TGAGTTTCTCGACCCTTTGC	60.007	20	256	143826	144081	TGAGTTTCTCGACCCTTTGC	60.007	20	CTGGAGTTTGCTCCCAGAAA	60	20	256	103971	104226
NC_030061.1	21	p1	(T)10	10	27054	27063	ATTGCATACGGCTCCACAAT	60.002	20	CTACCGAAAGGAAGGGTGGT	60.004	20	117	73679	73795	CTGGAGTTTGCTCCCAGAAA	60	20	TGAGTTTCTCGACCCTTTGC	60.007	20	256	143826	144081	TGAGTTTCTCGACCCTTTGC	60.007	20	CTGGAGTTTGCTCCCAGAAA	60	20	256	103971	104226
NC_030061.1	22	p1	(A)11	11	28085	28095	ATTGCATACGGCTCCACAAT	60.002	20	CTACCGAAAGGAAGGGTGGT	60.004	20	117	73679	73795	CTGGAGTTTGCTCCCAGAAA	60	20	TGAGTTTCTCGACCCTTTGC	60.007	20	256	143826	144081	TGAGTTTCTCGACCCTTTGC	60.007	20	CTGGAGTTTGCTCCCAGAAA	60	20	256	103971	104226
NC_030061.1	23	p1	(A)12	12	28619	28630	ATTGCATACGGCTCCACAAT	60.002	20	CTACCGAAAGGAAGGGTGGT	60.004	20	117	73679	73795	CTGGAGTTTGCTCCCAGAAA	60	20	TGAGTTTCTCGACCCTTTGC	60.007	20	256	143826	144081	TGAGTTTCTCGACCCTTTGC	60.007	20	CTGGAGTTTGCTCCCAGAAA	60	20	256	103971	104226
NC_030061.1	24	p1	(T)13	13	29044	29056	ATTGCATACGGCTCCACAAT	60.002	20	CTACCGAAAGGAAGGGTGGT	60.004	20	117	73679	73795	CTGGAGTTTGCTCCCAGAAA	60	20	TGAGTTTCTCGACCCTTTGC	60.007	20	256	143826	144081	TGAGTTTCTCGACCCTTTGC	60.007	20	CTGGAGTTTGCTCCCAGAAA	60	20	256	103971	104226
NC_030061.1	25	p1	(A)15	15	32098	32112	ATTGCATACGGCTCCACAAT	60.002	20	CTACCGAAAGGAAGGGTGGT	60.004	20	117	73679	73795	CTGGAGTTTGCTCCCAGAAA	60	20	TGAGTTTCTCGACCCTTTGC	60.007	20	256	143826	144081	TGAGTTTCTCGACCCTTTGC	60.007	20	CTGGAGTTTGCTCCCAGAAA	60	20	256	103971	104226
NC_030061.1	26	p2	(TA)6	12	32641	32652	ATTGCATACGGCTCCACAAT	60.002	20	CTACCGAAAGGAAGGGTGGT	60.004	20	117	73679	73795	CTGGAGTTTGCTCCCAGAAA	60	20	TGAGTTTCTCGACCCTTTGC	60.007	20	256	143826	144081	TGAGTTTCTCGACCCTTTGC	60.007	20	CTGGAGTTTGCTCCCAGAAA	60	20	256	103971	104226
NC_030061.1	27	p1	(T)10	10	34332	34341	ATTGCATACGGCTCCACAAT	60.002	20	CTACCGAAAGGAAGGGTGGT	60.004	20	117	73679	73795	CTGGAGTTTGCTCCCAGAAA	60	20	TGAGTTTCTCGACCCTTTGC	60.007	20	256	143826	144081	TGAGTTTCTCGACCCTTTGC	60.007	20	CTGGAGTTTGCTCCCAGAAA	60	20	256	103971	104226
NC_030061.1	28	p1	(A)11	11	34529	34539	ATTGCATACGGCTCCACAAT	60.002	20	CTACCGAAAGGAAGGGTGGT	60.004	20	117	73679	73795	CTGGAGTTTGCTCCCAGAAA	60	20	TGAGTTTCTCGACCCTTTGC	60.007	20	256	143826	144081	TGAGTTTCTCGACCCTTTGC	60.007	20	CTGGAGTTTGCTCCCAGAAA	60	20	256	103971	104226
NC_030061.1	29	p1	(A)12	12	38007	38018	ATTGCATACGGCTCCACAAT	60.002	20	CTACCGAAAGGAAGGGTGGT	60.004	20	117	73679	73795	CTGGAGTTTGCTCCCAGAAA	60	20	TGAGTTTCTCGACCCTTTGC	60.007	20	256	143826	144081	TGAGTTTCTCGACCCTTTGC	60.007	20	CTGGAGTTTGCTCCCAGAAA	60	20	256	103971	104226
NC_030061.1	30	c	(A)12ttgggggaggggtcaaagtcaaacttcttgaatgaaag(A)10	60	38848	38907	ATTGCATACGGCTCCACAAT	60.002	20	CTACCGAAAGGAAGGGTGGT	60.004	20	117	73679	73795	CTGGAGTTTGCTCCCAGAAA	60	20	TGAGTTTCTCGACCCTTTGC	60.007	20	256	143826	144081	TGAGTTTCTCGACCCTTTGC	60.007	20	CTGGAGTTTGCTCCCAGAAA	60	20	256	103971	104226
NC_030061.1	31	p3	(ATA)5	15	39013	39027	ATTGCATACGGCTCCACAAT	60.002	20	CTACCGAAAGGAAGGGTGGT	60.004	20	117	73679	73795	CTGGAGTTTGCTCCCAGAAA	60	20	TGAGTTTCTCGACCCTTTGC	60.007	20	256	143826	144081	TGAGTTTCTCGACCCTTTGC	60.007	20	CTGGAGTTTGCTCCCAGAAA	60	20	256	103971	104226
NC_030061.1	32	p1	(C)10	10	43012	43021	ATTGCATACGGCTCCACAAT	60.002	20	CTACCGAAAGGAAGGGTGGT	60.004	20	117	73679	73795	CTGGAGTTTGCTCCCAGAAA	60	20	TGAGTTTCTCGACCCTTTGC	60.007	20	256	143826	144081	TGAGTTTCTCGACCCTTTGC	60.007	20	CTGGAGTTTGCTCCCAGAAA	60	20	256	103971	104226
NC_030061.1	33	p1	(A)14	14	47119	47132	ATTGCATACGGCTCCACAAT	60.002	20	CTACCGAAAGGAAGGGTGGT	60.004	20	117	73679	73795	CTGGAGTTTGCTCCCAGAAA	60	20	TGAGTTTCTCGACCCTTTGC	60.007	20	256	143826	144081	TGAGTTTCTCGACCCTTTGC	60.007	20	CTGGAGTTTGCTCCCAGAAA	60	20	256	103971	104226
NC_030061.1	34	p1	(A)12	12	50192	50203	ATTGCATACGGCTCCACAAT	60.002	20	CTACCGAAAGGAAGGGTGGT	60.004	20	117	73679	73795	CTGGAGTTTGCTCCCAGAAA	60	20	TGAGTTTCTCGACCCTTTGC	60.007	20	256	143826	144081	TGAGTTTCTCGACCCTTTGC	60.007	20	CTGGAGTTTGCTCCCAGAAA	60	20	256	103971	104226
NC_030061.1	35	p1	(T)14	14	52010	52023	ATTGCATACGGCTCCACAAT	60.002	20	CTACCGAAAGGAAGGGTGGT	60.004	20	117	73679	73795	CTGGAGTTTGCTCCCAGAAA	60	20	TGAGTTTCTCGACCCTTTGC	60.007	20	256	143826	144081	TGAGTTTCTCGACCCTTTGC	60.007	20	CTGGAGTTTGCTCCCAGAAA	60	20	256	103971	104226
NC_030061.1	36	p1	(T)15	15	53948	53962	ATTGCATACGGCTCCACAAT	60.002	20	CTACCGAAAGGAAGGGTGGT	60.004	20	117	73679	73795	CTGGAGTTTGCTCCCAGAAA	60	20	TGAGTTTCTCGACCCTTTGC	60.007	20	256	143826	144081	TGAGTTTCTCGACCCTTTGC	60.007	20	CTGGAGTTTGCTCCCAGAAA	60	20	256	103971	104226
NC_030061.1	37	p1	(T)10	10	54182	54191	ATTGCATACGGCTCCACAAT	60.002	20	CTACCGAAAGGAAGGGTGGT	60.004	20	117	73679	73795	CTGGAGTTTGCTCCCAGAAA	60	20	TGAGTTTCTCGACCCTTTGC	60.007	20	256	143826	144081	TGAGTTTCTCGACCCTTTGC	60.007	20	CTGGAGTTTGCTCCCAGAAA	60	20	256	103971	104226
NC_030061.1	38	p1	(A)10	10	55655	55664	ATTGCATACGGCTCCACAAT	60.002	20	CTACCGAAAGGAAGGGTGGT	60.004	20	117	73679	73795	CTGGAGTTTGCTCCCAGAAA	60	20	TGAGTTTCTCGACCCTTTGC	60.007	20	256	143826	144081	TGAGTTTCTCGACCCTTTGC	60.007	20	CTGGAGTTTGCTCCCAGAAA	60	20	256	103971	104226
NC_030061.1	39	p1	(T)12	12	55775	55786	ATTGCATACGGCTCCACAAT	60.002	20	CTACCGAAAGGAAGGGTGGT	60.004	20	117	73679	73795	CTGGAGTTTGCTCCCAGAAA	60	20	TGAGTTTCTCGACCCTTTGC	60.007	20	256	143826	144081	TGAGTTTCTCGACCCTTTGC	60.007	20	CTGGAGTTTGCTCCCAGAAA	60	20	256	103971	104226
NC_030061.1	40	p1	(T)10	10	56066	56075	ATTGCATACGGCTCCACAAT	60.002	20	CTACCGAAAGGAAGGGTGGT	60.004	20	117	73679	73795	CTGGAGTTTGCTCCCAGAAA	60	20	TGAGTTTCTCGACCCTTTGC	60.007	20	256	143826	144081	TGAGTTTCTCGACCCTTTGC	60.007	20	CTGGAGTTTGCTCCCAGAAA	60	20	256	103971	104226
NC_030061.1	41	p1	(T)11	11	56683	56693	ATTGCATACGGCTCCACAAT	60.002	20	CTACCGAAAGGAAGGGTGGT	60.004	20	117	73679	73795	CTGGAGTTTGCTCCCAGAAA	60	20	TGAGTTTCTCGACCCTTTGC	60.007	20	256	143826	144081	TGAGTTTCTCGACCCTTTGC	60.007	20	CTGGAGTTTGCTCCCAGAAA	60	20	256	103971	104226
NC_030061.1	42	c	(A)11(G)11	22	59165	59186	ATTGCATACGGCTCCACAAT	60.002	20	CTACCGAAAGGAAGGGTGGT	60.004	20	117	73679	73795	CTGGAGTTTGCTCCCAGAAA	60	20	TGAGTTTCTCGACCCTTTGC	60.007	20	256	143826	144081	TGAGTTTCTCGACCCTTTGC	60.007	20	CTGGAGTTTGCTCCCAGAAA	60	20	256	103971	104226
NC_030061.1	43	p1	(T)12	12	63048	63059	ATTGCATACGGCTCCACAAT	60.002	20	CTACCGAAAGGAAGGGTGGT	60.004	20	117	73679	73795	CTGGAGTTTGCTCCCAGAAA	60	20	TGAGTTTCTCGACCCTTTGC	60.007	20	256	143826	144081	TGAGTTTCTCGACCCTTTGC	60.007	20	CTGGAGTTTGCTCCCAGAAA	60	20	256	103971	104226
NC_030061.1	44	p1	(T)10	10	68649	68658	ATTGCATACGGCTCCACAAT	60.002	20	CTACCGAAAGGAAGGGTGGT	60.004	20	117	73679	73795	CTGGAGTTTGCTCCCAGAAA	60	20	TGAGTTTCTCGACCCTTTGC	60.007	20	256	143826	144081	TGAGTTTCTCGACCCTTTGC	60.007	20	CTGGAGTTTGCTCCCAGAAA	60	20	256	103971	104226
NC_030061.1	45	p1	(T)10	10	70614	70623	ATTGCATACGGCTCCACAAT	60.002	20	CTACCGAAAGGAAGGGTGGT	60.004	20	117	73679	73795	CTGGAGTTTGCTCCCAGAAA	60	20	TGAGTTTCTCGACCCTTTGC	60.007	20	256	143826	144081	TGAGTTTCTCGACCCTTTGC	60.007	20	CTGGAGTTTGCTCCCAGAAA	60	20	256	103971	104226
NC_030061.1	46	c	(A)10taatcgaaaaatgaagaagaaattttttttgtattgaaacgtgttca(T)11	68	71669	71736	ATTGCATACGGCTCCACAAT	60.002	20	CTACCGAAAGGAAGGGTGGT	60.004	20	117	73679	73795	CTGGAGTTTGCTCCCAGAAA	60	20	TGAGTTTCTCGACCCTTTGC	60.007	20	256	143826	144081	TGAGTTTCTCGACCCTTTGC	60.007	20	CTGGAGTTTGCTCCCAGAAA	60	20	256	103971	104226
NC_030061.1	47	c	(T)10agtttagtatgctttgataatatttgataatataaatattggaaaaataattctggtgtgaaaac(A)11	86	73918	74003	ATTGCATACGGCTCCACAAT	60.002	20	CTACCGAAAGGAAGGGTGGT	60.004	20	117	73679	73795	CTGGAGTTTGCTCCCAGAAA	60	20	TGAGTTTCTCGACCCTTTGC	60.007	20	256	143826	144081	TGAGTTTCTCGACCCTTTGC	60.007	20	CTGGAGTTTGCTCCCAGAAA	60	20	256	103971	104226
NC_030061.1	48	p1	(A)14	14	74587	74600	ATTGCATACGGCTCCACAAT	60.002	20	CTACCGAAAGGAAGGGTGGT	60.004	20	117	73679	73795	CTGGAGTTTGCTCCCAGAAA	60	20	TGAGTTTCTCGACCCTTTGC	60.007	20	256	143826	144081	TGAGTTTCTCGACCCTTTGC	60.007	20	CTGGAGTTTGCTCCCAGAAA	60	20	256	103971	104226
NC_030061.1	49	p1	(T)11	11	74855	74865	ATTGCATACGGCTCCACAAT	60.002	20	CTACCGAAAGGAAGGGTGGT	60.004	20	117	73679	73795	CTGGAGTTTGCTCCCAGAAA	60	20	TGAGTTTCTCGACCCTTTGC	60.007	20	256	143826	144081	TGAGTTTCTCGACCCTTTGC	60.007	20	CTGGAGTTTGCTCCCAGAAA	60	20	256	103971	104226
NC_030061.1	50	p1	(A)10	10	78370	78379	ATTGCATACGGCTCCACAAT	60.002	20	CTACCGAAAGGAAGGGTGGT	60.004	20	117	73679	73795	CTGGAGTTTGCTCCCAGAAA	60	20	TGAGTTTCTCGACCCTTTGC	60.007	20	256	143826	144081	TGAGTTTCTCGACCCTTTGC	60.007	20	CTGGAGTTTGCTCCCAGAAA	60	20	256	103971	104226
NC_030061.1	51	p1	(A)11	11	78707	78717	ATTGCATACGGCTCCACAAT	60.002	20	CTACCGAAAGGAAGGGTGGT	60.004	20	117	73679	73795	CTGGAGTTTGCTCCCAGAAA	60	20	TGAGTTTCTCGACCCTTTGC	60.007	20	256	143826	144081	TGAGTTTCTCGACCCTTTGC	60.007	20	CTGGAGTTTGCTCCCAGAAA	60	20	256	103971	104226
NC_030061.1	52	p1	(A)11	11	81222	81232	ATTGCATACGGCTCCACAAT	60.002	20	CTACCGAAAGGAAGGGTGGT	60.004	20	117	73679	73795	CTGGAGTTTGCTCCCAGAAA	60	20	TGAGTTTCTCGACCCTTTGC	60.007	20	256	143826	144081	TGAGTTTCTCGACCCTTTGC	60.007	20	CTGGAGTTTGCTCCCAGAAA	60	20	256	103971	104226
NC_030061.1	53	c	(T)10atcttcgccctttgcgtg(A)13	41	84425	84465	ATTGCATACGGCTCCACAAT	60.002	20	CTACCGAAAGGAAGGGTGGT	60.004	20	117	73679	73795	CTGGAGTTTGCTCCCAGAAA	60	20	TGAGTTTCTCGACCCTTTGC	60.007	20	256	143826	144081	TGAGTTTCTCGACCCTTTGC	60.007	20	CTGGAGTTTGCTCCCAGAAA	60	20	256	103971	104226
NC_030061.1	54	p1	(T)11	11	85240	85250	ATTGCATACGGCTCCACAAT	60.002	20	CTACCGAAAGGAAGGGTGGT	60.004	20	117	73679	73795	CTGGAGTTTGCTCCCAGAAA	60	20	TGAGTTTCTCGACCCTTTGC	60.007	20	256	143826	144081	TGAGTTTCTCGACCCTTTGC	60.007	20	CTGGAGTTTGCTCCCAGAAA	60	20	256	103971	104226
NC_030061.1	55	c	(T)15aatctaacctaaccctaaat(A)11	46	85988	86033	ATTGCATACGGCTCCACAAT	60.002	20	CTACCGAAAGGAAGGGTGGT	60.004	20	117	73679	73795	CTGGAGTTTGCTCCCAGAAA	60	20	TGAGTTTCTCGACCCTTTGC	60.007	20	256	143826	144081	TGAGTTTCTCGACCCTTTGC	60.007	20	CTGGAGTTTGCTCCCAGAAA	60	20	256	103971	104226
NC_030061.1	56	p1	(T)10	10	86990	86999	ATTGCATACGGCTCCACAAT	60.002	20	CTACCGAAAGGAAGGGTGGT	60.004	20	117	73679	73795	CTGGAGTTTGCTCCCAGAAA	60	20	TGAGTTTCTCGACCCTTTGC	60.007	20	256	143826	144081	TGAGTTTCTCGACCCTTTGC	60.007	20	CTGGAGTTTGCTCCCAGAAA	60	20	256	103971	104226
NC_030061.1	57	p1	(T)13	13	102722	102734	ATTGCATACGGCTCCACAAT	60.002	20	CTACCGAAAGGAAGGGTGGT	60.004	20	117	73679	73795	CTGGAGTTTGCTCCCAGAAA	60	20	TGAGTTTCTCGACCCTTTGC	60.007	20	256	143826	144081	TGAGTTTCTCGACCCTTTGC	60.007	20	CTGGAGTTTGCTCCCAGAAA	60	20	256	103971	104226
NC_030061.1	58	c	(A)14ttatatat(TA)6t(TA)7	49	114130	114178	ATTGCATACGGCTCCACAAT	60.002	20	CTACCGAAAGGAAGGGTGGT	60.004	20	117	73679	73795	CTGGAGTTTGCTCCCAGAAA	60	20	TGAGTTTCTCGACCCTTTGC	60.007	20	256	143826	144081	TGAGTTTCTCGACCCTTTGC	60.007	20	CTGGAGTTTGCTCCCAGAAA	60	20	256	103971	104226
NC_030061.1	59	p1	(A)10	10	117424	117433	ATTGCATACGGCTCCACAAT	60.002	20	CTACCGAAAGGAAGGGTGGT	60.004	20	117	73679	73795	CTGGAGTTTGCTCCCAGAAA	60	20	TGAGTTTCTCGACCCTTTGC	60.007	20	256	143826	144081	TGAGTTTCTCGACCCTTTGC	60.007	20	CTGGAGTTTGCTCCCAGAAA	60	20	256	103971	104226
NC_030061.1	60	p1	(A)13	13	118015	118027	ATTGCATACGGCTCCACAAT	60.002	20	CTACCGAAAGGAAGGGTGGT	60.004	20	117	73679	73795	CTGGAGTTTGCTCCCAGAAA	60	20	TGAGTTTCTCGACCCTTTGC	60.007	20	256	143826	144081	TGAGTTTCTCGACCCTTTGC	60.007	20	CTGGAGTTTGCTCCCAGAAA	60	20	256	103971	104226
NC_030061.1	61	p1	(A)12	12	118436	118447	ATTGCATACGGCTCCACAAT	60.002	20	CTACCGAAAGGAAGGGTGGT	60.004	20	117	73679	73795	CTGGAGTTTGCTCCCAGAAA	60	20	TGAGTTTCTCGACCCTTTGC	60.007	20	256	143826	144081	TGAGTTTCTCGACCCTTTGC	60.007	20	CTGGAGTTTGCTCCCAGAAA	60	20	256	103971	104226
NC_030061.1	62	p1	(A)11	11	118555	118565	ATTGCATACGGCTCCACAAT	60.002	20	CTACCGAAAGGAAGGGTGGT	60.004	20	117	73679	73795	CTGGAGTTTGCTCCCAGAAA	60	20	TGAGTTTCTCGACCCTTTGC	60.007	20	256	143826	144081	TGAGTTTCTCGACCCTTTGC	60.007	20	CTGGAGTTTGCTCCCAGAAA	60	20	256	103971	104226
NC_030061.1	63	p1	(A)10	10	118935	118944	ATTGCATACGGCTCCACAAT	60.002	20	CTACCGAAAGGAAGGGTGGT	60.004	20	117	73679	73795	CTGGAGTTTGCTCCCAGAAA	60	20	TGAGTTTCTCGACCCTTTGC	60.007	20	256	143826	144081	TGAGTTTCTCGACCCTTTGC	60.007	20	CTGGAGTTTGCTCCCAGAAA	60	20	256	103971	104226
NC_030061.1	64	p1	(T)11	11	122439	122449	ATTGCATACGGCTCCACAAT	60.002	20	CTACCGAAAGGAAGGGTGGT	60.004	20	117	73679	73795	CTGGAGTTTGCTCCCAGAAA	60	20	TGAGTTTCTCGACCCTTTGC	60.007	20	256	143826	144081	TGAGTTTCTCGACCCTTTGC	60.007	20	CTGGAGTTTGCTCCCAGAAA	60	20	256	103971	104226
NC_030061.1	65	c	(T)11agaatcaaaataggt(A)10	36	126908	126943	ATTGCATACGGCTCCACAAT	60.002	20	CTACCGAAAGGAAGGGTGGT	60.004	20	117	73679	73795	CTGGAGTTTGCTCCCAGAAA	60	20	TGAGTTTCTCGACCCTTTGC	60.007	20	256	143826	144081	TGAGTTTCTCGACCCTTTGC	60.007	20	CTGGAGTTTGCTCCCAGAAA	60	20	256	103971	104226
NC_030061.1	66	p1	(T)11	11	129122	129132	ATTGCATACGGCTCCACAAT	60.002	20	CTACCGAAAGGAAGGGTGGT	60.004	20	117	73679	73795	CTGGAGTTTGCTCCCAGAAA	60	20	TGAGTTTCTCGACCCTTTGC	60.007	20	256	143826	144081	TGAGTTTCTCGACCCTTTGC	60.007	20	CTGGAGTTTGCTCCCAGAAA	60	20	256	103971	104226
NC_030061.1	67	p1	(T)10	10	129237	129246	ATTGCATACGGCTCCACAAT	60.002	20	CTACCGAAAGGAAGGGTGGT	60.004	20	117	73679	73795	CTGGAGTTTGCTCCCAGAAA	60	20	TGAGTTTCTCGACCCTTTGC	60.007	20	256	143826	144081	TGAGTTTCTCGACCCTTTGC	60.007	20	CTGGAGTTTGCTCCCAGAAA	60	20	256	103971	104226
NC_030061.1	68	p1	(T)10	10	132105	132114	ATTGCATACGGCTCCACAAT	60.002	20	CTACCGAAAGGAAGGGTGGT	60.004	20	117	73679	73795	CTGGAGTTTGCTCCCAGAAA	60	20	TGAGTTTCTCGACCCTTTGC	60.007	20	256	143826	144081	TGAGTTTCTCGACCCTTTGC	60.007	20	CTGGAGTTTGCTCCCAGAAA	60	20	256	103971	104226
NC_030061.1	69	c	(T)10ctttttcttttgtctcttcagaattcgaaatttttaattccgtgcctttccccttccaatttttgaaactaaaattaagcattccggagatatc(A)10	114	132818	132931	ATTGCATACGGCTCCACAAT	60.002	20	CTACCGAAAGGAAGGGTGGT	60.004	20	117	73679	73795	CTGGAGTTTGCTCCCAGAAA	60	20	TGAGTTTCTCGACCCTTTGC	60.007	20	256	143826	144081	TGAGTTTCTCGACCCTTTGC	60.007	20	CTGGAGTTTGCTCCCAGAAA	60	20	256	103971	104226
NC_030061.1	70	p1	(T)10	10	133291	133300	ATTGCATACGGCTCCACAAT	60.002	20	CTACCGAAAGGAAGGGTGGT	60.004	20	117	73679	73795	CTGGAGTTTGCTCCCAGAAA	60	20	TGAGTTTCTCGACCCTTTGC	60.007	20	256	143826	144081	TGAGTTTCTCGACCCTTTGC	60.007	20	CTGGAGTTTGCTCCCAGAAA	60	20	256	103971	104226
NC_030061.1	71	p1	(A)13	13	145320	145332	ATTGCATACGGCTCCACAAT	60.002	20	CTACCGAAAGGAAGGGTGGT	60.004	20	117	73679	73795	CTGGAGTTTGCTCCCAGAAA	60	20	TGAGTTTCTCGACCCTTTGC	60.007	20	256	143826	144081	TGAGTTTCTCGACCCTTTGC	60.007	20	CTGGAGTTTGCTCCCAGAAA	60	20	256	103971	104226
NC_029945.1	1	p1	(A)11	11	259	269	CTGGTCCTTTTACCCGGACT	60.004	20	CCGGTACTTGTGGATTCAGG	60	20	129	81873	82001	AGACCTGGTCCTTTTACCCG	60.004	20	CGGTACTTGTGGATTCAGGG	60	20	132	81869	82000	AGACCTGGTCCTTTTACCCG	60.004	20	CCGGTACTTGTGGATTCAGG	60	20	133	81869	82001
NC_029945.1	2	p1	(A)11	11	4021	4031	CTGGTCCTTTTACCCGGACT	60.004	20	CCGGTACTTGTGGATTCAGG	60	20	129	81873	82001	AGACCTGGTCCTTTTACCCG	60.004	20	CGGTACTTGTGGATTCAGGG	60	20	132	81869	82000	AGACCTGGTCCTTTTACCCG	60.004	20	CCGGTACTTGTGGATTCAGG	60	20	133	81869	82001
NC_029945.1	3	p1	(A)11	11	4857	4867	CTGGTCCTTTTACCCGGACT	60.004	20	CCGGTACTTGTGGATTCAGG	60	20	129	81873	82001	AGACCTGGTCCTTTTACCCG	60.004	20	CGGTACTTGTGGATTCAGGG	60	20	132	81869	82000	AGACCTGGTCCTTTTACCCG	60.004	20	CCGGTACTTGTGGATTCAGG	60	20	133	81869	82001
NC_029945.1	4	p1	(T)10	10	5600	5609	CTGGTCCTTTTACCCGGACT	60.004	20	CCGGTACTTGTGGATTCAGG	60	20	129	81873	82001	AGACCTGGTCCTTTTACCCG	60.004	20	CGGTACTTGTGGATTCAGGG	60	20	132	81869	82000	AGACCTGGTCCTTTTACCCG	60.004	20	CCGGTACTTGTGGATTCAGG	60	20	133	81869	82001
NC_029945.1	5	p1	(T)11	11	6531	6541	CTGGTCCTTTTACCCGGACT	60.004	20	CCGGTACTTGTGGATTCAGG	60	20	129	81873	82001	AGACCTGGTCCTTTTACCCG	60.004	20	CGGTACTTGTGGATTCAGGG	60	20	132	81869	82000	AGACCTGGTCCTTTTACCCG	60.004	20	CCGGTACTTGTGGATTCAGG	60	20	133	81869	82001
NC_029945.1	6	p1	(T)10	10	7464	7473	CTGGTCCTTTTACCCGGACT	60.004	20	CCGGTACTTGTGGATTCAGG	60	20	129	81873	82001	AGACCTGGTCCTTTTACCCG	60.004	20	CGGTACTTGTGGATTCAGGG	60	20	132	81869	82000	AGACCTGGTCCTTTTACCCG	60.004	20	CCGGTACTTGTGGATTCAGG	60	20	133	81869	82001
NC_029945.1	7	p1	(A)10	10	8028	8037	CTGGTCCTTTTACCCGGACT	60.004	20	CCGGTACTTGTGGATTCAGG	60	20	129	81873	82001	AGACCTGGTCCTTTTACCCG	60.004	20	CGGTACTTGTGGATTCAGGG	60	20	132	81869	82000	AGACCTGGTCCTTTTACCCG	60.004	20	CCGGTACTTGTGGATTCAGG	60	20	133	81869	82001
NC_029945.1	8	c	(A)10ggggggggtctcaaga(T)12	38	8576	8613	CTGGTCCTTTTACCCGGACT	60.004	20	CCGGTACTTGTGGATTCAGG	60	20	129	81873	82001	AGACCTGGTCCTTTTACCCG	60.004	20	CGGTACTTGTGGATTCAGGG	60	20	132	81869	82000	AGACCTGGTCCTTTTACCCG	60.004	20	CCGGTACTTGTGGATTCAGG	60	20	133	81869	82001
NC_029945.1	9	p1	(A)13	13	8805	8817	CTGGTCCTTTTACCCGGACT	60.004	20	CCGGTACTTGTGGATTCAGG	60	20	129	81873	82001	AGACCTGGTCCTTTTACCCG	60.004	20	CGGTACTTGTGGATTCAGGG	60	20	132	81869	82000	AGACCTGGTCCTTTTACCCG	60.004	20	CCGGTACTTGTGGATTCAGG	60	20	133	81869	82001
NC_029945.1	10	p1	(A)11	11	13011	13021	CTGGTCCTTTTACCCGGACT	60.004	20	CCGGTACTTGTGGATTCAGG	60	20	129	81873	82001	AGACCTGGTCCTTTTACCCG	60.004	20	CGGTACTTGTGGATTCAGGG	60	20	132	81869	82000	AGACCTGGTCCTTTTACCCG	60.004	20	CCGGTACTTGTGGATTCAGG	60	20	133	81869	82001
NC_029945.1	11	p1	(A)11	11	13670	13680	CTGGTCCTTTTACCCGGACT	60.004	20	CCGGTACTTGTGGATTCAGG	60	20	129	81873	82001	AGACCTGGTCCTTTTACCCG	60.004	20	CGGTACTTGTGGATTCAGGG	60	20	132	81869	82000	AGACCTGGTCCTTTTACCCG	60.004	20	CCGGTACTTGTGGATTCAGG	60	20	133	81869	82001
NC_029945.1	12	p1	(A)13	13	15056	15068	CTGGTCCTTTTACCCGGACT	60.004	20	CCGGTACTTGTGGATTCAGG	60	20	129	81873	82001	AGACCTGGTCCTTTTACCCG	60.004	20	CGGTACTTGTGGATTCAGGG	60	20	132	81869	82000	AGACCTGGTCCTTTTACCCG	60.004	20	CCGGTACTTGTGGATTCAGG	60	20	133	81869	82001
NC_029945.1	13	p1	(T)10	10	18843	18852	CTGGTCCTTTTACCCGGACT	60.004	20	CCGGTACTTGTGGATTCAGG	60	20	129	81873	82001	AGACCTGGTCCTTTTACCCG	60.004	20	CGGTACTTGTGGATTCAGGG	60	20	132	81869	82000	AGACCTGGTCCTTTTACCCG	60.004	20	CCGGTACTTGTGGATTCAGG	60	20	133	81869	82001
NC_029945.1	14	p1	(T)11	11	22982	22992	CTGGTCCTTTTACCCGGACT	60.004	20	CCGGTACTTGTGGATTCAGG	60	20	129	81873	82001	AGACCTGGTCCTTTTACCCG	60.004	20	CGGTACTTGTGGATTCAGGG	60	20	132	81869	82000	AGACCTGGTCCTTTTACCCG	60.004	20	CCGGTACTTGTGGATTCAGG	60	20	133	81869	82001
NC_029945.1	15	p1	(T)10	10	26631	26640	CTGGTCCTTTTACCCGGACT	60.004	20	CCGGTACTTGTGGATTCAGG	60	20	129	81873	82001	AGACCTGGTCCTTTTACCCG	60.004	20	CGGTACTTGTGGATTCAGGG	60	20	132	81869	82000	AGACCTGGTCCTTTTACCCG	60.004	20	CCGGTACTTGTGGATTCAGG	60	20	133	81869	82001
NC_029945.1	16	p1	(A)10	10	28189	28198	CTGGTCCTTTTACCCGGACT	60.004	20	CCGGTACTTGTGGATTCAGG	60	20	129	81873	82001	AGACCTGGTCCTTTTACCCG	60.004	20	CGGTACTTGTGGATTCAGGG	60	20	132	81869	82000	AGACCTGGTCCTTTTACCCG	60.004	20	CCGGTACTTGTGGATTCAGG	60	20	133	81869	82001
NC_029945.1	17	p1	(T)10	10	29548	29557	CTGGTCCTTTTACCCGGACT	60.004	20	CCGGTACTTGTGGATTCAGG	60	20	129	81873	82001	AGACCTGGTCCTTTTACCCG	60.004	20	CGGTACTTGTGGATTCAGGG	60	20	132	81869	82000	AGACCTGGTCCTTTTACCCG	60.004	20	CCGGTACTTGTGGATTCAGG	60	20	133	81869	82001
NC_029945.1	18	p1	(T)10	10	30249	30258	CTGGTCCTTTTACCCGGACT	60.004	20	CCGGTACTTGTGGATTCAGG	60	20	129	81873	82001	AGACCTGGTCCTTTTACCCG	60.004	20	CGGTACTTGTGGATTCAGGG	60	20	132	81869	82000	AGACCTGGTCCTTTTACCCG	60.004	20	CCGGTACTTGTGGATTCAGG	60	20	133	81869	82001
NC_029945.1	19	p1	(T)12	12	31676	31687	CTGGTCCTTTTACCCGGACT	60.004	20	CCGGTACTTGTGGATTCAGG	60	20	129	81873	82001	AGACCTGGTCCTTTTACCCG	60.004	20	CGGTACTTGTGGATTCAGGG	60	20	132	81869	82000	AGACCTGGTCCTTTTACCCG	60.004	20	CCGGTACTTGTGGATTCAGG	60	20	133	81869	82001
NC_029945.1	20	p1	(G)11	11	35474	35484	CTGGTCCTTTTACCCGGACT	60.004	20	CCGGTACTTGTGGATTCAGG	60	20	129	81873	82001	AGACCTGGTCCTTTTACCCG	60.004	20	CGGTACTTGTGGATTCAGGG	60	20	132	81869	82000	AGACCTGGTCCTTTTACCCG	60.004	20	CCGGTACTTGTGGATTCAGG	60	20	133	81869	82001
NC_029945.1	21	p1	(A)15	15	38488	38502	CTGGTCCTTTTACCCGGACT	60.004	20	CCGGTACTTGTGGATTCAGG	60	20	129	81873	82001	AGACCTGGTCCTTTTACCCG	60.004	20	CGGTACTTGTGGATTCAGGG	60	20	132	81869	82000	AGACCTGGTCCTTTTACCCG	60.004	20	CCGGTACTTGTGGATTCAGG	60	20	133	81869	82001
NC_029945.1	22	p1	(C)10	10	41460	41469	CTGGTCCTTTTACCCGGACT	60.004	20	CCGGTACTTGTGGATTCAGG	60	20	129	81873	82001	AGACCTGGTCCTTTTACCCG	60.004	20	CGGTACTTGTGGATTCAGGG	60	20	132	81869	82000	AGACCTGGTCCTTTTACCCG	60.004	20	CCGGTACTTGTGGATTCAGG	60	20	133	81869	82001
NC_029945.1	23	p1	(T)11	11	43104	43114	CTGGTCCTTTTACCCGGACT	60.004	20	CCGGTACTTGTGGATTCAGG	60	20	129	81873	82001	AGACCTGGTCCTTTTACCCG	60.004	20	CGGTACTTGTGGATTCAGGG	60	20	132	81869	82000	AGACCTGGTCCTTTTACCCG	60.004	20	CCGGTACTTGTGGATTCAGG	60	20	133	81869	82001
NC_029945.1	24	p1	(T)10	10	44032	44041	CTGGTCCTTTTACCCGGACT	60.004	20	CCGGTACTTGTGGATTCAGG	60	20	129	81873	82001	AGACCTGGTCCTTTTACCCG	60.004	20	CGGTACTTGTGGATTCAGGG	60	20	132	81869	82000	AGACCTGGTCCTTTTACCCG	60.004	20	CCGGTACTTGTGGATTCAGG	60	20	133	81869	82001
NC_029945.1	25	c	(T)12caaaaaaacaacaattttctttctatccggaagcgtgtgcccttctcgtaagactgag(A)12	82	45526	45607	CTGGTCCTTTTACCCGGACT	60.004	20	CCGGTACTTGTGGATTCAGG	60	20	129	81873	82001	AGACCTGGTCCTTTTACCCG	60.004	20	CGGTACTTGTGGATTCAGGG	60	20	132	81869	82000	AGACCTGGTCCTTTTACCCG	60.004	20	CCGGTACTTGTGGATTCAGG	60	20	133	81869	82001
NC_029945.1	26	p1	(A)11	11	45853	45863	CTGGTCCTTTTACCCGGACT	60.004	20	CCGGTACTTGTGGATTCAGG	60	20	129	81873	82001	AGACCTGGTCCTTTTACCCG	60.004	20	CGGTACTTGTGGATTCAGGG	60	20	132	81869	82000	AGACCTGGTCCTTTTACCCG	60.004	20	CCGGTACTTGTGGATTCAGG	60	20	133	81869	82001
NC_029945.1	27	p1	(T)10	10	47608	47617	CTGGTCCTTTTACCCGGACT	60.004	20	CCGGTACTTGTGGATTCAGG	60	20	129	81873	82001	AGACCTGGTCCTTTTACCCG	60.004	20	CGGTACTTGTGGATTCAGGG	60	20	132	81869	82000	AGACCTGGTCCTTTTACCCG	60.004	20	CCGGTACTTGTGGATTCAGG	60	20	133	81869	82001
NC_029945.1	28	p2	(TA)6	12	49896	49907	CTGGTCCTTTTACCCGGACT	60.004	20	CCGGTACTTGTGGATTCAGG	60	20	129	81873	82001	AGACCTGGTCCTTTTACCCG	60.004	20	CGGTACTTGTGGATTCAGGG	60	20	132	81869	82000	AGACCTGGTCCTTTTACCCG	60.004	20	CCGGTACTTGTGGATTCAGG	60	20	133	81869	82001
NC_029945.1	29	p1	(T)11	11	50531	50541	CTGGTCCTTTTACCCGGACT	60.004	20	CCGGTACTTGTGGATTCAGG	60	20	129	81873	82001	AGACCTGGTCCTTTTACCCG	60.004	20	CGGTACTTGTGGATTCAGGG	60	20	132	81869	82000	AGACCTGGTCCTTTTACCCG	60.004	20	CCGGTACTTGTGGATTCAGG	60	20	133	81869	82001
NC_029945.1	30	p1	(T)13	13	53997	54009	CTGGTCCTTTTACCCGGACT	60.004	20	CCGGTACTTGTGGATTCAGG	60	20	129	81873	82001	AGACCTGGTCCTTTTACCCG	60.004	20	CGGTACTTGTGGATTCAGGG	60	20	132	81869	82000	AGACCTGGTCCTTTTACCCG	60.004	20	CCGGTACTTGTGGATTCAGG	60	20	133	81869	82001
NC_029945.1	31	p1	(T)10	10	54130	54139	CTGGTCCTTTTACCCGGACT	60.004	20	CCGGTACTTGTGGATTCAGG	60	20	129	81873	82001	AGACCTGGTCCTTTTACCCG	60.004	20	CGGTACTTGTGGATTCAGGG	60	20	132	81869	82000	AGACCTGGTCCTTTTACCCG	60.004	20	CCGGTACTTGTGGATTCAGG	60	20	133	81869	82001
NC_029945.1	32	p1	(A)13	13	57561	57573	CTGGTCCTTTTACCCGGACT	60.004	20	CCGGTACTTGTGGATTCAGG	60	20	129	81873	82001	AGACCTGGTCCTTTTACCCG	60.004	20	CGGTACTTGTGGATTCAGGG	60	20	132	81869	82000	AGACCTGGTCCTTTTACCCG	60.004	20	CCGGTACTTGTGGATTCAGG	60	20	133	81869	82001
NC_029945.1	33	p1	(A)20	20	61856	61875	CTGGTCCTTTTACCCGGACT	60.004	20	CCGGTACTTGTGGATTCAGG	60	20	129	81873	82001	AGACCTGGTCCTTTTACCCG	60.004	20	CGGTACTTGTGGATTCAGGG	60	20	132	81869	82000	AGACCTGGTCCTTTTACCCG	60.004	20	CCGGTACTTGTGGATTCAGG	60	20	133	81869	82001
NC_029945.1	34	p1	(T)12	12	63201	63212	CTGGTCCTTTTACCCGGACT	60.004	20	CCGGTACTTGTGGATTCAGG	60	20	129	81873	82001	AGACCTGGTCCTTTTACCCG	60.004	20	CGGTACTTGTGGATTCAGGG	60	20	132	81869	82000	AGACCTGGTCCTTTTACCCG	60.004	20	CCGGTACTTGTGGATTCAGG	60	20	133	81869	82001
NC_029945.1	35	p1	(A)10	10	65257	65266	CTGGTCCTTTTACCCGGACT	60.004	20	CCGGTACTTGTGGATTCAGG	60	20	129	81873	82001	AGACCTGGTCCTTTTACCCG	60.004	20	CGGTACTTGTGGATTCAGGG	60	20	132	81869	82000	AGACCTGGTCCTTTTACCCG	60.004	20	CCGGTACTTGTGGATTCAGG	60	20	133	81869	82001
NC_029945.1	36	p1	(T)10	10	65409	65418	CTGGTCCTTTTACCCGGACT	60.004	20	CCGGTACTTGTGGATTCAGG	60	20	129	81873	82001	AGACCTGGTCCTTTTACCCG	60.004	20	CGGTACTTGTGGATTCAGGG	60	20	132	81869	82000	AGACCTGGTCCTTTTACCCG	60.004	20	CCGGTACTTGTGGATTCAGG	60	20	133	81869	82001
NC_029945.1	37	p1	(T)12	12	65615	65626	CTGGTCCTTTTACCCGGACT	60.004	20	CCGGTACTTGTGGATTCAGG	60	20	129	81873	82001	AGACCTGGTCCTTTTACCCG	60.004	20	CGGTACTTGTGGATTCAGGG	60	20	132	81869	82000	AGACCTGGTCCTTTTACCCG	60.004	20	CCGGTACTTGTGGATTCAGG	60	20	133	81869	82001
NC_029945.1	38	p1	(A)10	10	66227	66236	CTGGTCCTTTTACCCGGACT	60.004	20	CCGGTACTTGTGGATTCAGG	60	20	129	81873	82001	AGACCTGGTCCTTTTACCCG	60.004	20	CGGTACTTGTGGATTCAGGG	60	20	132	81869	82000	AGACCTGGTCCTTTTACCCG	60.004	20	CCGGTACTTGTGGATTCAGG	60	20	133	81869	82001
NC_029945.1	39	c	(A)10gaaaatagaattttttttatttcttatttcatagtgatttatgttcatgaagagtttcc(T)15	84	66856	66939	CTGGTCCTTTTACCCGGACT	60.004	20	CCGGTACTTGTGGATTCAGG	60	20	129	81873	82001	AGACCTGGTCCTTTTACCCG	60.004	20	CGGTACTTGTGGATTCAGGG	60	20	132	81869	82000	AGACCTGGTCCTTTTACCCG	60.004	20	CCGGTACTTGTGGATTCAGG	60	20	133	81869	82001
NC_029945.1	40	p1	(A)10	10	68226	68235	CTGGTCCTTTTACCCGGACT	60.004	20	CCGGTACTTGTGGATTCAGG	60	20	129	81873	82001	AGACCTGGTCCTTTTACCCG	60.004	20	CGGTACTTGTGGATTCAGGG	60	20	132	81869	82000	AGACCTGGTCCTTTTACCCG	60.004	20	CCGGTACTTGTGGATTCAGG	60	20	133	81869	82001
NC_029945.1	41	p1	(A)11	11	68797	68807	CTGGTCCTTTTACCCGGACT	60.004	20	CCGGTACTTGTGGATTCAGG	60	20	129	81873	82001	AGACCTGGTCCTTTTACCCG	60.004	20	CGGTACTTGTGGATTCAGGG	60	20	132	81869	82000	AGACCTGGTCCTTTTACCCG	60.004	20	CCGGTACTTGTGGATTCAGG	60	20	133	81869	82001
NC_029945.1	42	p1	(T)16	16	68942	68957	CTGGTCCTTTTACCCGGACT	60.004	20	CCGGTACTTGTGGATTCAGG	60	20	129	81873	82001	AGACCTGGTCCTTTTACCCG	60.004	20	CGGTACTTGTGGATTCAGGG	60	20	132	81869	82000	AGACCTGGTCCTTTTACCCG	60.004	20	CCGGTACTTGTGGATTCAGG	60	20	133	81869	82001
NC_029945.1	43	p1	(T)11	11	71974	71984	CTGGTCCTTTTACCCGGACT	60.004	20	CCGGTACTTGTGGATTCAGG	60	20	129	81873	82001	AGACCTGGTCCTTTTACCCG	60.004	20	CGGTACTTGTGGATTCAGGG	60	20	132	81869	82000	AGACCTGGTCCTTTTACCCG	60.004	20	CCGGTACTTGTGGATTCAGG	60	20	133	81869	82001
NC_029945.1	44	p1	(A)13	13	72297	72309	CTGGTCCTTTTACCCGGACT	60.004	20	CCGGTACTTGTGGATTCAGG	60	20	129	81873	82001	AGACCTGGTCCTTTTACCCG	60.004	20	CGGTACTTGTGGATTCAGGG	60	20	132	81869	82000	AGACCTGGTCCTTTTACCCG	60.004	20	CCGGTACTTGTGGATTCAGG	60	20	133	81869	82001
NC_029945.1	45	p1	(A)13	13	72844	72856	CTGGTCCTTTTACCCGGACT	60.004	20	CCGGTACTTGTGGATTCAGG	60	20	129	81873	82001	AGACCTGGTCCTTTTACCCG	60.004	20	CGGTACTTGTGGATTCAGGG	60	20	132	81869	82000	AGACCTGGTCCTTTTACCCG	60.004	20	CCGGTACTTGTGGATTCAGG	60	20	133	81869	82001
NC_029945.1	46	p1	(T)14	14	73007	73020	CTGGTCCTTTTACCCGGACT	60.004	20	CCGGTACTTGTGGATTCAGG	60	20	129	81873	82001	AGACCTGGTCCTTTTACCCG	60.004	20	CGGTACTTGTGGATTCAGGG	60	20	132	81869	82000	AGACCTGGTCCTTTTACCCG	60.004	20	CCGGTACTTGTGGATTCAGG	60	20	133	81869	82001
NC_029945.1	47	p1	(T)11	11	73744	73754	CTGGTCCTTTTACCCGGACT	60.004	20	CCGGTACTTGTGGATTCAGG	60	20	129	81873	82001	AGACCTGGTCCTTTTACCCG	60.004	20	CGGTACTTGTGGATTCAGGG	60	20	132	81869	82000	AGACCTGGTCCTTTTACCCG	60.004	20	CCGGTACTTGTGGATTCAGG	60	20	133	81869	82001
NC_029945.1	48	p1	(T)11	11	73957	73967	CTGGTCCTTTTACCCGGACT	60.004	20	CCGGTACTTGTGGATTCAGG	60	20	129	81873	82001	AGACCTGGTCCTTTTACCCG	60.004	20	CGGTACTTGTGGATTCAGGG	60	20	132	81869	82000	AGACCTGGTCCTTTTACCCG	60.004	20	CCGGTACTTGTGGATTCAGG	60	20	133	81869	82001
NC_029945.1	49	p1	(T)11	11	77817	77827	CTGGTCCTTTTACCCGGACT	60.004	20	CCGGTACTTGTGGATTCAGG	60	20	129	81873	82001	AGACCTGGTCCTTTTACCCG	60.004	20	CGGTACTTGTGGATTCAGGG	60	20	132	81869	82000	AGACCTGGTCCTTTTACCCG	60.004	20	CCGGTACTTGTGGATTCAGG	60	20	133	81869	82001
NC_029945.1	50	p1	(A)10	10	78057	78066	CTGGTCCTTTTACCCGGACT	60.004	20	CCGGTACTTGTGGATTCAGG	60	20	129	81873	82001	AGACCTGGTCCTTTTACCCG	60.004	20	CGGTACTTGTGGATTCAGGG	60	20	132	81869	82000	AGACCTGGTCCTTTTACCCG	60.004	20	CCGGTACTTGTGGATTCAGG	60	20	133	81869	82001
NC_029945.1	51	p1	(T)12	12	78190	78201	CTGGTCCTTTTACCCGGACT	60.004	20	CCGGTACTTGTGGATTCAGG	60	20	129	81873	82001	AGACCTGGTCCTTTTACCCG	60.004	20	CGGTACTTGTGGATTCAGGG	60	20	132	81869	82000	AGACCTGGTCCTTTTACCCG	60.004	20	CCGGTACTTGTGGATTCAGG	60	20	133	81869	82001
NC_029945.1	52	c	(T)10ctttcattctatatacctatcccttttttc(A)10	50	82736	82785	CTGGTCCTTTTACCCGGACT	60.004	20	CCGGTACTTGTGGATTCAGG	60	20	129	81873	82001	AGACCTGGTCCTTTTACCCG	60.004	20	CGGTACTTGTGGATTCAGGG	60	20	132	81869	82000	AGACCTGGTCCTTTTACCCG	60.004	20	CCGGTACTTGTGGATTCAGG	60	20	133	81869	82001
NC_029945.1	53	p1	(T)14	14	83286	83299	CTGGTCCTTTTACCCGGACT	60.004	20	CCGGTACTTGTGGATTCAGG	60	20	129	81873	82001	AGACCTGGTCCTTTTACCCG	60.004	20	CGGTACTTGTGGATTCAGGG	60	20	132	81869	82000	AGACCTGGTCCTTTTACCCG	60.004	20	CCGGTACTTGTGGATTCAGG	60	20	133	81869	82001
NC_029945.1	54	p1	(A)14	14	84395	84408	CTGGTCCTTTTACCCGGACT	60.004	20	CCGGTACTTGTGGATTCAGG	60	20	129	81873	82001	AGACCTGGTCCTTTTACCCG	60.004	20	CGGTACTTGTGGATTCAGGG	60	20	132	81869	82000	AGACCTGGTCCTTTTACCCG	60.004	20	CCGGTACTTGTGGATTCAGG	60	20	133	81869	82001
NC_029945.1	55	p1	(T)12	12	85016	85027	CTGGTCCTTTTACCCGGACT	60.004	20	CCGGTACTTGTGGATTCAGG	60	20	129	81873	82001	AGACCTGGTCCTTTTACCCG	60.004	20	CGGTACTTGTGGATTCAGGG	60	20	132	81869	82000	AGACCTGGTCCTTTTACCCG	60.004	20	CCGGTACTTGTGGATTCAGG	60	20	133	81869	82001
NC_029945.1	56	c	(T)15ctctcacccttccatattatccgtatccctttttgctttacaactttctgatctgattgatttctttttgtatcttatgtcaaaaata(T)12	115	85169	85283	CTGGTCCTTTTACCCGGACT	60.004	20	CCGGTACTTGTGGATTCAGG	60	20	129	81873	82001	AGACCTGGTCCTTTTACCCG	60.004	20	CGGTACTTGTGGATTCAGGG	60	20	132	81869	82000	AGACCTGGTCCTTTTACCCG	60.004	20	CCGGTACTTGTGGATTCAGG	60	20	133	81869	82001
NC_029945.1	57	p1	(T)10	10	85551	85560	CTGGTCCTTTTACCCGGACT	60.004	20	CCGGTACTTGTGGATTCAGG	60	20	129	81873	82001	AGACCTGGTCCTTTTACCCG	60.004	20	CGGTACTTGTGGATTCAGGG	60	20	132	81869	82000	AGACCTGGTCCTTTTACCCG	60.004	20	CCGGTACTTGTGGATTCAGG	60	20	133	81869	82001
NC_029945.1	58	p1	(A)10	10	92141	92150	CTGGTCCTTTTACCCGGACT	60.004	20	CCGGTACTTGTGGATTCAGG	60	20	129	81873	82001	AGACCTGGTCCTTTTACCCG	60.004	20	CGGTACTTGTGGATTCAGGG	60	20	132	81869	82000	AGACCTGGTCCTTTTACCCG	60.004	20	CCGGTACTTGTGGATTCAGG	60	20	133	81869	82001
NC_029945.1	59	p1	(A)13	13	112817	112829	CTGGTCCTTTTACCCGGACT	60.004	20	CCGGTACTTGTGGATTCAGG	60	20	129	81873	82001	AGACCTGGTCCTTTTACCCG	60.004	20	CGGTACTTGTGGATTCAGGG	60	20	132	81869	82000	AGACCTGGTCCTTTTACCCG	60.004	20	CCGGTACTTGTGGATTCAGG	60	20	133	81869	82001
NC_029945.1	60	p1	(T)14	14	116807	116820	CTGGTCCTTTTACCCGGACT	60.004	20	CCGGTACTTGTGGATTCAGG	60	20	129	81873	82001	AGACCTGGTCCTTTTACCCG	60.004	20	CGGTACTTGTGGATTCAGGG	60	20	132	81869	82000	AGACCTGGTCCTTTTACCCG	60.004	20	CCGGTACTTGTGGATTCAGG	60	20	133	81869	82001
NC_029945.1	61	p1	(A)10	10	116935	116944	CTGGTCCTTTTACCCGGACT	60.004	20	CCGGTACTTGTGGATTCAGG	60	20	129	81873	82001	AGACCTGGTCCTTTTACCCG	60.004	20	CGGTACTTGTGGATTCAGGG	60	20	132	81869	82000	AGACCTGGTCCTTTTACCCG	60.004	20	CCGGTACTTGTGGATTCAGG	60	20	133	81869	82001
NC_029945.1	62	p1	(T)10	10	117574	117583	CTGGTCCTTTTACCCGGACT	60.004	20	CCGGTACTTGTGGATTCAGG	60	20	129	81873	82001	AGACCTGGTCCTTTTACCCG	60.004	20	CGGTACTTGTGGATTCAGGG	60	20	132	81869	82000	AGACCTGGTCCTTTTACCCG	60.004	20	CCGGTACTTGTGGATTCAGG	60	20	133	81869	82001
NC_029945.1	63	p2	(AT)7	14	117793	117806	CTGGTCCTTTTACCCGGACT	60.004	20	CCGGTACTTGTGGATTCAGG	60	20	129	81873	82001	AGACCTGGTCCTTTTACCCG	60.004	20	CGGTACTTGTGGATTCAGGG	60	20	132	81869	82000	AGACCTGGTCCTTTTACCCG	60.004	20	CCGGTACTTGTGGATTCAGG	60	20	133	81869	82001
NC_029945.1	64	p1	(T)15	15	117923	117937	CTGGTCCTTTTACCCGGACT	60.004	20	CCGGTACTTGTGGATTCAGG	60	20	129	81873	82001	AGACCTGGTCCTTTTACCCG	60.004	20	CGGTACTTGTGGATTCAGGG	60	20	132	81869	82000	AGACCTGGTCCTTTTACCCG	60.004	20	CCGGTACTTGTGGATTCAGG	60	20	133	81869	82001
NC_029945.1	65	p1	(A)13	13	124762	124774	CTGGTCCTTTTACCCGGACT	60.004	20	CCGGTACTTGTGGATTCAGG	60	20	129	81873	82001	AGACCTGGTCCTTTTACCCG	60.004	20	CGGTACTTGTGGATTCAGGG	60	20	132	81869	82000	AGACCTGGTCCTTTTACCCG	60.004	20	CCGGTACTTGTGGATTCAGG	60	20	133	81869	82001
NC_029945.1	66	p1	(A)13	13	131295	131307	CTGGTCCTTTTACCCGGACT	60.004	20	CCGGTACTTGTGGATTCAGG	60	20	129	81873	82001	AGACCTGGTCCTTTTACCCG	60.004	20	CGGTACTTGTGGATTCAGGG	60	20	132	81869	82000	AGACCTGGTCCTTTTACCCG	60.004	20	CCGGTACTTGTGGATTCAGG	60	20	133	81869	82001
NC_029945.1	67	p1	(T)13	13	132871	132883	CTGGTCCTTTTACCCGGACT	60.004	20	CCGGTACTTGTGGATTCAGG	60	20	129	81873	82001	AGACCTGGTCCTTTTACCCG	60.004	20	CGGTACTTGTGGATTCAGGG	60	20	132	81869	82000	AGACCTGGTCCTTTTACCCG	60.004	20	CCGGTACTTGTGGATTCAGG	60	20	133	81869	82001
NC_029945.1	68	p1	(T)10	10	153550	153559	CTGGTCCTTTTACCCGGACT	60.004	20	CCGGTACTTGTGGATTCAGG	60	20	129	81873	82001	AGACCTGGTCCTTTTACCCG	60.004	20	CGGTACTTGTGGATTCAGGG	60	20	132	81869	82000	AGACCTGGTCCTTTTACCCG	60.004	20	CCGGTACTTGTGGATTCAGG	60	20	133	81869	82001
NC_029943.1	1	p1	(A)15	15	4035	4049	CTGGTCCTTTTACCCGGACT	60.004	20	CCGGTACTTGTGGATTCAGG	60	20	129	82347	82475	AGACCTGGTCCTTTTACCCG	60.004	20	CGGTACTTGTGGATTCAGGG	60	20	132	82343	82474	AGACCTGGTCCTTTTACCCG	60.004	20	CCGGTACTTGTGGATTCAGG	60	20	133	82343	82475
NC_029943.1	2	p1	(A)12	12	4870	4881	CTGGTCCTTTTACCCGGACT	60.004	20	CCGGTACTTGTGGATTCAGG	60	20	129	82347	82475	AGACCTGGTCCTTTTACCCG	60.004	20	CGGTACTTGTGGATTCAGGG	60	20	132	82343	82474	AGACCTGGTCCTTTTACCCG	60.004	20	CCGGTACTTGTGGATTCAGG	60	20	133	82343	82475
NC_029943.1	3	p1	(T)10	10	6549	6558	CTGGTCCTTTTACCCGGACT	60.004	20	CCGGTACTTGTGGATTCAGG	60	20	129	82347	82475	AGACCTGGTCCTTTTACCCG	60.004	20	CGGTACTTGTGGATTCAGGG	60	20	132	82343	82474	AGACCTGGTCCTTTTACCCG	60.004	20	CCGGTACTTGTGGATTCAGG	60	20	133	82343	82475
NC_029943.1	4	c	(T)12caatcaattcaatattattgaataattttaatgaattgtcaaatcacaatcaataaaaacctctagagttgtttc(T)12	99	7474	7572	CTGGTCCTTTTACCCGGACT	60.004	20	CCGGTACTTGTGGATTCAGG	60	20	129	82347	82475	AGACCTGGTCCTTTTACCCG	60.004	20	CGGTACTTGTGGATTCAGGG	60	20	132	82343	82474	AGACCTGGTCCTTTTACCCG	60.004	20	CCGGTACTTGTGGATTCAGG	60	20	133	82343	82475
NC_029943.1	5	c	(A)14ggggtctcaaga(T)12	38	8672	8709	CTGGTCCTTTTACCCGGACT	60.004	20	CCGGTACTTGTGGATTCAGG	60	20	129	82347	82475	AGACCTGGTCCTTTTACCCG	60.004	20	CGGTACTTGTGGATTCAGGG	60	20	132	82343	82474	AGACCTGGTCCTTTTACCCG	60.004	20	CCGGTACTTGTGGATTCAGG	60	20	133	82343	82475
NC_029943.1	6	p1	(A)15	15	8901	8915	CTGGTCCTTTTACCCGGACT	60.004	20	CCGGTACTTGTGGATTCAGG	60	20	129	82347	82475	AGACCTGGTCCTTTTACCCG	60.004	20	CGGTACTTGTGGATTCAGGG	60	20	132	82343	82474	AGACCTGGTCCTTTTACCCG	60.004	20	CCGGTACTTGTGGATTCAGG	60	20	133	82343	82475
NC_029943.1	7	p1	(T)10	10	10152	10161	CTGGTCCTTTTACCCGGACT	60.004	20	CCGGTACTTGTGGATTCAGG	60	20	129	82347	82475	AGACCTGGTCCTTTTACCCG	60.004	20	CGGTACTTGTGGATTCAGGG	60	20	132	82343	82474	AGACCTGGTCCTTTTACCCG	60.004	20	CCGGTACTTGTGGATTCAGG	60	20	133	82343	82475
NC_029943.1	8	p1	(A)13	13	13105	13117	CTGGTCCTTTTACCCGGACT	60.004	20	CCGGTACTTGTGGATTCAGG	60	20	129	82347	82475	AGACCTGGTCCTTTTACCCG	60.004	20	CGGTACTTGTGGATTCAGGG	60	20	132	82343	82474	AGACCTGGTCCTTTTACCCG	60.004	20	CCGGTACTTGTGGATTCAGG	60	20	133	82343	82475
NC_029943.1	9	p1	(T)10	10	13368	13377	CTGGTCCTTTTACCCGGACT	60.004	20	CCGGTACTTGTGGATTCAGG	60	20	129	82347	82475	AGACCTGGTCCTTTTACCCG	60.004	20	CGGTACTTGTGGATTCAGGG	60	20	132	82343	82474	AGACCTGGTCCTTTTACCCG	60.004	20	CCGGTACTTGTGGATTCAGG	60	20	133	82343	82475
NC_029943.1	10	p1	(A)14	14	15142	15155	CTGGTCCTTTTACCCGGACT	60.004	20	CCGGTACTTGTGGATTCAGG	60	20	129	82347	82475	AGACCTGGTCCTTTTACCCG	60.004	20	CGGTACTTGTGGATTCAGGG	60	20	132	82343	82474	AGACCTGGTCCTTTTACCCG	60.004	20	CCGGTACTTGTGGATTCAGG	60	20	133	82343	82475
NC_029943.1	11	p1	(T)10	10	18938	18947	CTGGTCCTTTTACCCGGACT	60.004	20	CCGGTACTTGTGGATTCAGG	60	20	129	82347	82475	AGACCTGGTCCTTTTACCCG	60.004	20	CGGTACTTGTGGATTCAGGG	60	20	132	82343	82474	AGACCTGGTCCTTTTACCCG	60.004	20	CCGGTACTTGTGGATTCAGG	60	20	133	82343	82475
NC_029943.1	12	p1	(T)10	10	23078	23087	CTGGTCCTTTTACCCGGACT	60.004	20	CCGGTACTTGTGGATTCAGG	60	20	129	82347	82475	AGACCTGGTCCTTTTACCCG	60.004	20	CGGTACTTGTGGATTCAGGG	60	20	132	82343	82474	AGACCTGGTCCTTTTACCCG	60.004	20	CCGGTACTTGTGGATTCAGG	60	20	133	82343	82475
NC_029943.1	13	p1	(T)10	10	26726	26735	CTGGTCCTTTTACCCGGACT	60.004	20	CCGGTACTTGTGGATTCAGG	60	20	129	82347	82475	AGACCTGGTCCTTTTACCCG	60.004	20	CGGTACTTGTGGATTCAGGG	60	20	132	82343	82474	AGACCTGGTCCTTTTACCCG	60.004	20	CCGGTACTTGTGGATTCAGG	60	20	133	82343	82475
NC_029943.1	14	p2	(AT)8	16	27510	27525	CTGGTCCTTTTACCCGGACT	60.004	20	CCGGTACTTGTGGATTCAGG	60	20	129	82347	82475	AGACCTGGTCCTTTTACCCG	60.004	20	CGGTACTTGTGGATTCAGGG	60	20	132	82343	82474	AGACCTGGTCCTTTTACCCG	60.004	20	CCGGTACTTGTGGATTCAGG	60	20	133	82343	82475
NC_029943.1	15	p1	(A)12	12	28286	28297	CTGGTCCTTTTACCCGGACT	60.004	20	CCGGTACTTGTGGATTCAGG	60	20	129	82347	82475	AGACCTGGTCCTTTTACCCG	60.004	20	CGGTACTTGTGGATTCAGGG	60	20	132	82343	82474	AGACCTGGTCCTTTTACCCG	60.004	20	CCGGTACTTGTGGATTCAGG	60	20	133	82343	82475
NC_029943.1	16	p1	(A)12	12	28412	28423	CTGGTCCTTTTACCCGGACT	60.004	20	CCGGTACTTGTGGATTCAGG	60	20	129	82347	82475	AGACCTGGTCCTTTTACCCG	60.004	20	CGGTACTTGTGGATTCAGGG	60	20	132	82343	82474	AGACCTGGTCCTTTTACCCG	60.004	20	CCGGTACTTGTGGATTCAGG	60	20	133	82343	82475
NC_029943.1	17	p1	(T)10	10	29927	29936	CTGGTCCTTTTACCCGGACT	60.004	20	CCGGTACTTGTGGATTCAGG	60	20	129	82347	82475	AGACCTGGTCCTTTTACCCG	60.004	20	CGGTACTTGTGGATTCAGGG	60	20	132	82343	82474	AGACCTGGTCCTTTTACCCG	60.004	20	CCGGTACTTGTGGATTCAGG	60	20	133	82343	82475
NC_029943.1	18	p1	(T)10	10	30636	30645	CTGGTCCTTTTACCCGGACT	60.004	20	CCGGTACTTGTGGATTCAGG	60	20	129	82347	82475	AGACCTGGTCCTTTTACCCG	60.004	20	CGGTACTTGTGGATTCAGGG	60	20	132	82343	82474	AGACCTGGTCCTTTTACCCG	60.004	20	CCGGTACTTGTGGATTCAGG	60	20	133	82343	82475
NC_029943.1	19	p1	(T)11	11	32062	32072	CTGGTCCTTTTACCCGGACT	60.004	20	CCGGTACTTGTGGATTCAGG	60	20	129	82347	82475	AGACCTGGTCCTTTTACCCG	60.004	20	CGGTACTTGTGGATTCAGGG	60	20	132	82343	82474	AGACCTGGTCCTTTTACCCG	60.004	20	CCGGTACTTGTGGATTCAGG	60	20	133	82343	82475
NC_029943.1	20	p1	(G)11	11	35855	35865	CTGGTCCTTTTACCCGGACT	60.004	20	CCGGTACTTGTGGATTCAGG	60	20	129	82347	82475	AGACCTGGTCCTTTTACCCG	60.004	20	CGGTACTTGTGGATTCAGGG	60	20	132	82343	82474	AGACCTGGTCCTTTTACCCG	60.004	20	CCGGTACTTGTGGATTCAGG	60	20	133	82343	82475
NC_029943.1	21	p1	(T)10	10	37287	37296	CTGGTCCTTTTACCCGGACT	60.004	20	CCGGTACTTGTGGATTCAGG	60	20	129	82347	82475	AGACCTGGTCCTTTTACCCG	60.004	20	CGGTACTTGTGGATTCAGGG	60	20	132	82343	82474	AGACCTGGTCCTTTTACCCG	60.004	20	CCGGTACTTGTGGATTCAGG	60	20	133	82343	82475
NC_029943.1	22	p1	(A)10	10	38875	38884	CTGGTCCTTTTACCCGGACT	60.004	20	CCGGTACTTGTGGATTCAGG	60	20	129	82347	82475	AGACCTGGTCCTTTTACCCG	60.004	20	CGGTACTTGTGGATTCAGGG	60	20	132	82343	82474	AGACCTGGTCCTTTTACCCG	60.004	20	CCGGTACTTGTGGATTCAGG	60	20	133	82343	82475
NC_029943.1	23	p1	(C)10	10	41842	41851	CTGGTCCTTTTACCCGGACT	60.004	20	CCGGTACTTGTGGATTCAGG	60	20	129	82347	82475	AGACCTGGTCCTTTTACCCG	60.004	20	CGGTACTTGTGGATTCAGGG	60	20	132	82343	82474	AGACCTGGTCCTTTTACCCG	60.004	20	CCGGTACTTGTGGATTCAGG	60	20	133	82343	82475
NC_029943.1	24	p1	(T)11	11	43486	43496	CTGGTCCTTTTACCCGGACT	60.004	20	CCGGTACTTGTGGATTCAGG	60	20	129	82347	82475	AGACCTGGTCCTTTTACCCG	60.004	20	CGGTACTTGTGGATTCAGGG	60	20	132	82343	82474	AGACCTGGTCCTTTTACCCG	60.004	20	CCGGTACTTGTGGATTCAGG	60	20	133	82343	82475
NC_029943.1	25	p1	(A)17	17	44087	44103	CTGGTCCTTTTACCCGGACT	60.004	20	CCGGTACTTGTGGATTCAGG	60	20	129	82347	82475	AGACCTGGTCCTTTTACCCG	60.004	20	CGGTACTTGTGGATTCAGGG	60	20	132	82343	82474	AGACCTGGTCCTTTTACCCG	60.004	20	CCGGTACTTGTGGATTCAGG	60	20	133	82343	82475
NC_029943.1	26	p1	(T)13	13	44421	44433	CTGGTCCTTTTACCCGGACT	60.004	20	CCGGTACTTGTGGATTCAGG	60	20	129	82347	82475	AGACCTGGTCCTTTTACCCG	60.004	20	CGGTACTTGTGGATTCAGGG	60	20	132	82343	82474	AGACCTGGTCCTTTTACCCG	60.004	20	CCGGTACTTGTGGATTCAGG	60	20	133	82343	82475
NC_029943.1	27	p1	(T)11	11	44898	44908	CTGGTCCTTTTACCCGGACT	60.004	20	CCGGTACTTGTGGATTCAGG	60	20	129	82347	82475	AGACCTGGTCCTTTTACCCG	60.004	20	CGGTACTTGTGGATTCAGGG	60	20	132	82343	82474	AGACCTGGTCCTTTTACCCG	60.004	20	CCGGTACTTGTGGATTCAGG	60	20	133	82343	82475
NC_029943.1	28	c	(T)10c(A)11caattttctttctatccggaagcgtgtgcccttctcgtaagactgag(A)11	80	45927	46006	CTGGTCCTTTTACCCGGACT	60.004	20	CCGGTACTTGTGGATTCAGG	60	20	129	82347	82475	AGACCTGGTCCTTTTACCCG	60.004	20	CGGTACTTGTGGATTCAGGG	60	20	132	82343	82474	AGACCTGGTCCTTTTACCCG	60.004	20	CCGGTACTTGTGGATTCAGG	60	20	133	82343	82475
NC_029943.1	29	p1	(A)10	10	46252	46261	CTGGTCCTTTTACCCGGACT	60.004	20	CCGGTACTTGTGGATTCAGG	60	20	129	82347	82475	AGACCTGGTCCTTTTACCCG	60.004	20	CGGTACTTGTGGATTCAGGG	60	20	132	82343	82474	AGACCTGGTCCTTTTACCCG	60.004	20	CCGGTACTTGTGGATTCAGG	60	20	133	82343	82475
NC_029943.1	30	p1	(T)13	13	46866	46878	CTGGTCCTTTTACCCGGACT	60.004	20	CCGGTACTTGTGGATTCAGG	60	20	129	82347	82475	AGACCTGGTCCTTTTACCCG	60.004	20	CGGTACTTGTGGATTCAGGG	60	20	132	82343	82474	AGACCTGGTCCTTTTACCCG	60.004	20	CCGGTACTTGTGGATTCAGG	60	20	133	82343	82475
NC_029943.1	31	p1	(T)14	14	50946	50959	CTGGTCCTTTTACCCGGACT	60.004	20	CCGGTACTTGTGGATTCAGG	60	20	129	82347	82475	AGACCTGGTCCTTTTACCCG	60.004	20	CGGTACTTGTGGATTCAGGG	60	20	132	82343	82474	AGACCTGGTCCTTTTACCCG	60.004	20	CCGGTACTTGTGGATTCAGG	60	20	133	82343	82475
NC_029943.1	32	p1	(T)13	13	54403	54415	CTGGTCCTTTTACCCGGACT	60.004	20	CCGGTACTTGTGGATTCAGG	60	20	129	82347	82475	AGACCTGGTCCTTTTACCCG	60.004	20	CGGTACTTGTGGATTCAGGG	60	20	132	82343	82474	AGACCTGGTCCTTTTACCCG	60.004	20	CCGGTACTTGTGGATTCAGG	60	20	133	82343	82475
NC_029943.1	33	p1	(T)10	10	54535	54544	CTGGTCCTTTTACCCGGACT	60.004	20	CCGGTACTTGTGGATTCAGG	60	20	129	82347	82475	AGACCTGGTCCTTTTACCCG	60.004	20	CGGTACTTGTGGATTCAGGG	60	20	132	82343	82474	AGACCTGGTCCTTTTACCCG	60.004	20	CCGGTACTTGTGGATTCAGG	60	20	133	82343	82475
NC_029943.1	34	p1	(A)10	10	57984	57993	CTGGTCCTTTTACCCGGACT	60.004	20	CCGGTACTTGTGGATTCAGG	60	20	129	82347	82475	AGACCTGGTCCTTTTACCCG	60.004	20	CGGTACTTGTGGATTCAGGG	60	20	132	82343	82474	AGACCTGGTCCTTTTACCCG	60.004	20	CCGGTACTTGTGGATTCAGG	60	20	133	82343	82475
NC_029943.1	35	p1	(A)14	14	62306	62319	CTGGTCCTTTTACCCGGACT	60.004	20	CCGGTACTTGTGGATTCAGG	60	20	129	82347	82475	AGACCTGGTCCTTTTACCCG	60.004	20	CGGTACTTGTGGATTCAGGG	60	20	132	82343	82474	AGACCTGGTCCTTTTACCCG	60.004	20	CCGGTACTTGTGGATTCAGG	60	20	133	82343	82475
NC_029943.1	36	p1	(T)11	11	63654	63664	CTGGTCCTTTTACCCGGACT	60.004	20	CCGGTACTTGTGGATTCAGG	60	20	129	82347	82475	AGACCTGGTCCTTTTACCCG	60.004	20	CGGTACTTGTGGATTCAGGG	60	20	132	82343	82474	AGACCTGGTCCTTTTACCCG	60.004	20	CCGGTACTTGTGGATTCAGG	60	20	133	82343	82475
NC_029943.1	37	p1	(A)12	12	65714	65725	CTGGTCCTTTTACCCGGACT	60.004	20	CCGGTACTTGTGGATTCAGG	60	20	129	82347	82475	AGACCTGGTCCTTTTACCCG	60.004	20	CGGTACTTGTGGATTCAGGG	60	20	132	82343	82474	AGACCTGGTCCTTTTACCCG	60.004	20	CCGGTACTTGTGGATTCAGG	60	20	133	82343	82475
NC_029943.1	38	p1	(A)10	10	66677	66686	CTGGTCCTTTTACCCGGACT	60.004	20	CCGGTACTTGTGGATTCAGG	60	20	129	82347	82475	AGACCTGGTCCTTTTACCCG	60.004	20	CGGTACTTGTGGATTCAGGG	60	20	132	82343	82474	AGACCTGGTCCTTTTACCCG	60.004	20	CCGGTACTTGTGGATTCAGG	60	20	133	82343	82475
NC_029943.1	39	p1	(A)13	13	67306	67318	CTGGTCCTTTTACCCGGACT	60.004	20	CCGGTACTTGTGGATTCAGG	60	20	129	82347	82475	AGACCTGGTCCTTTTACCCG	60.004	20	CGGTACTTGTGGATTCAGGG	60	20	132	82343	82474	AGACCTGGTCCTTTTACCCG	60.004	20	CCGGTACTTGTGGATTCAGG	60	20	133	82343	82475
NC_029943.1	40	p1	(A)10	10	68666	68675	CTGGTCCTTTTACCCGGACT	60.004	20	CCGGTACTTGTGGATTCAGG	60	20	129	82347	82475	AGACCTGGTCCTTTTACCCG	60.004	20	CGGTACTTGTGGATTCAGGG	60	20	132	82343	82474	AGACCTGGTCCTTTTACCCG	60.004	20	CCGGTACTTGTGGATTCAGG	60	20	133	82343	82475
NC_029943.1	41	p1	(A)11	11	69237	69247	CTGGTCCTTTTACCCGGACT	60.004	20	CCGGTACTTGTGGATTCAGG	60	20	129	82347	82475	AGACCTGGTCCTTTTACCCG	60.004	20	CGGTACTTGTGGATTCAGGG	60	20	132	82343	82474	AGACCTGGTCCTTTTACCCG	60.004	20	CCGGTACTTGTGGATTCAGG	60	20	133	82343	82475
NC_029943.1	42	p1	(T)15	15	69381	69395	CTGGTCCTTTTACCCGGACT	60.004	20	CCGGTACTTGTGGATTCAGG	60	20	129	82347	82475	AGACCTGGTCCTTTTACCCG	60.004	20	CGGTACTTGTGGATTCAGGG	60	20	132	82343	82474	AGACCTGGTCCTTTTACCCG	60.004	20	CCGGTACTTGTGGATTCAGG	60	20	133	82343	82475
NC_029943.1	43	p1	(T)12	12	72423	72434	CTGGTCCTTTTACCCGGACT	60.004	20	CCGGTACTTGTGGATTCAGG	60	20	129	82347	82475	AGACCTGGTCCTTTTACCCG	60.004	20	CGGTACTTGTGGATTCAGGG	60	20	132	82343	82474	AGACCTGGTCCTTTTACCCG	60.004	20	CCGGTACTTGTGGATTCAGG	60	20	133	82343	82475
NC_029943.1	44	p1	(A)15	15	72768	72782	CTGGTCCTTTTACCCGGACT	60.004	20	CCGGTACTTGTGGATTCAGG	60	20	129	82347	82475	AGACCTGGTCCTTTTACCCG	60.004	20	CGGTACTTGTGGATTCAGGG	60	20	132	82343	82474	AGACCTGGTCCTTTTACCCG	60.004	20	CCGGTACTTGTGGATTCAGG	60	20	133	82343	82475
NC_029943.1	45	p1	(A)11	11	73341	73351	CTGGTCCTTTTACCCGGACT	60.004	20	CCGGTACTTGTGGATTCAGG	60	20	129	82347	82475	AGACCTGGTCCTTTTACCCG	60.004	20	CGGTACTTGTGGATTCAGGG	60	20	132	82343	82474	AGACCTGGTCCTTTTACCCG	60.004	20	CCGGTACTTGTGGATTCAGG	60	20	133	82343	82475
NC_029943.1	46	p1	(T)12	12	73508	73519	CTGGTCCTTTTACCCGGACT	60.004	20	CCGGTACTTGTGGATTCAGG	60	20	129	82347	82475	AGACCTGGTCCTTTTACCCG	60.004	20	CGGTACTTGTGGATTCAGGG	60	20	132	82343	82474	AGACCTGGTCCTTTTACCCG	60.004	20	CCGGTACTTGTGGATTCAGG	60	20	133	82343	82475
NC_029943.1	47	p1	(T)11	11	74447	74457	CTGGTCCTTTTACCCGGACT	60.004	20	CCGGTACTTGTGGATTCAGG	60	20	129	82347	82475	AGACCTGGTCCTTTTACCCG	60.004	20	CGGTACTTGTGGATTCAGGG	60	20	132	82343	82474	AGACCTGGTCCTTTTACCCG	60.004	20	CCGGTACTTGTGGATTCAGG	60	20	133	82343	82475
NC_029943.1	48	p1	(T)12	12	78299	78310	CTGGTCCTTTTACCCGGACT	60.004	20	CCGGTACTTGTGGATTCAGG	60	20	129	82347	82475	AGACCTGGTCCTTTTACCCG	60.004	20	CGGTACTTGTGGATTCAGGG	60	20	132	82343	82474	AGACCTGGTCCTTTTACCCG	60.004	20	CCGGTACTTGTGGATTCAGG	60	20	133	82343	82475
NC_029943.1	49	p1	(T)10	10	78672	78681	CTGGTCCTTTTACCCGGACT	60.004	20	CCGGTACTTGTGGATTCAGG	60	20	129	82347	82475	AGACCTGGTCCTTTTACCCG	60.004	20	CGGTACTTGTGGATTCAGGG	60	20	132	82343	82474	AGACCTGGTCCTTTTACCCG	60.004	20	CCGGTACTTGTGGATTCAGG	60	20	133	82343	82475
NC_029943.1	50	c	(T)10c(A)13	24	83242	83265	CTGGTCCTTTTACCCGGACT	60.004	20	CCGGTACTTGTGGATTCAGG	60	20	129	82347	82475	AGACCTGGTCCTTTTACCCG	60.004	20	CGGTACTTGTGGATTCAGGG	60	20	132	82343	82474	AGACCTGGTCCTTTTACCCG	60.004	20	CCGGTACTTGTGGATTCAGG	60	20	133	82343	82475
NC_029943.1	51	c	(T)12caatttgatttattttgattttgta(T)13	50	83765	83814	CTGGTCCTTTTACCCGGACT	60.004	20	CCGGTACTTGTGGATTCAGG	60	20	129	82347	82475	AGACCTGGTCCTTTTACCCG	60.004	20	CGGTACTTGTGGATTCAGGG	60	20	132	82343	82474	AGACCTGGTCCTTTTACCCG	60.004	20	CCGGTACTTGTGGATTCAGG	60	20	133	82343	82475
NC_029943.1	52	p1	(T)14	14	85534	85547	CTGGTCCTTTTACCCGGACT	60.004	20	CCGGTACTTGTGGATTCAGG	60	20	129	82347	82475	AGACCTGGTCCTTTTACCCG	60.004	20	CGGTACTTGTGGATTCAGGG	60	20	132	82343	82474	AGACCTGGTCCTTTTACCCG	60.004	20	CCGGTACTTGTGGATTCAGG	60	20	133	82343	82475
NC_029943.1	53	c	(T)13ctctcacccttccatattatccgtatccctttttgctttacaactttctgatctgattgatttctttttgtatcttatgtcaaaaatatttgaaa(AT)7	122	85689	85810	CTGGTCCTTTTACCCGGACT	60.004	20	CCGGTACTTGTGGATTCAGG	60	20	129	82347	82475	AGACCTGGTCCTTTTACCCG	60.004	20	CGGTACTTGTGGATTCAGGG	60	20	132	82343	82474	AGACCTGGTCCTTTTACCCG	60.004	20	CCGGTACTTGTGGATTCAGG	60	20	133	82343	82475
NC_029943.1	54	p1	(A)10	10	85970	85979	CTGGTCCTTTTACCCGGACT	60.004	20	CCGGTACTTGTGGATTCAGG	60	20	129	82347	82475	AGACCTGGTCCTTTTACCCG	60.004	20	CGGTACTTGTGGATTCAGGG	60	20	132	82343	82474	AGACCTGGTCCTTTTACCCG	60.004	20	CCGGTACTTGTGGATTCAGG	60	20	133	82343	82475
NC_029943.1	55	p1	(T)12	12	86088	86099	CTGGTCCTTTTACCCGGACT	60.004	20	CCGGTACTTGTGGATTCAGG	60	20	129	82347	82475	AGACCTGGTCCTTTTACCCG	60.004	20	CGGTACTTGTGGATTCAGGG	60	20	132	82343	82474	AGACCTGGTCCTTTTACCCG	60.004	20	CCGGTACTTGTGGATTCAGG	60	20	133	82343	82475
NC_029943.1	56	p1	(A)10	10	92680	92689	CTGGTCCTTTTACCCGGACT	60.004	20	CCGGTACTTGTGGATTCAGG	60	20	129	82347	82475	AGACCTGGTCCTTTTACCCG	60.004	20	CGGTACTTGTGGATTCAGGG	60	20	132	82343	82474	AGACCTGGTCCTTTTACCCG	60.004	20	CCGGTACTTGTGGATTCAGG	60	20	133	82343	82475
NC_029943.1	57	p1	(A)13	13	113362	113374	CTGGTCCTTTTACCCGGACT	60.004	20	CCGGTACTTGTGGATTCAGG	60	20	129	82347	82475	AGACCTGGTCCTTTTACCCG	60.004	20	CGGTACTTGTGGATTCAGGG	60	20	132	82343	82474	AGACCTGGTCCTTTTACCCG	60.004	20	CCGGTACTTGTGGATTCAGG	60	20	133	82343	82475
NC_029943.1	58	p1	(T)10	10	117326	117335	CTGGTCCTTTTACCCGGACT	60.004	20	CCGGTACTTGTGGATTCAGG	60	20	129	82347	82475	AGACCTGGTCCTTTTACCCG	60.004	20	CGGTACTTGTGGATTCAGGG	60	20	132	82343	82474	AGACCTGGTCCTTTTACCCG	60.004	20	CCGGTACTTGTGGATTCAGG	60	20	133	82343	82475
NC_029943.1	59	p1	(A)12	12	117462	117473	CTGGTCCTTTTACCCGGACT	60.004	20	CCGGTACTTGTGGATTCAGG	60	20	129	82347	82475	AGACCTGGTCCTTTTACCCG	60.004	20	CGGTACTTGTGGATTCAGGG	60	20	132	82343	82474	AGACCTGGTCCTTTTACCCG	60.004	20	CCGGTACTTGTGGATTCAGG	60	20	133	82343	82475
NC_029943.1	60	p1	(T)11	11	118086	118096	CTGGTCCTTTTACCCGGACT	60.004	20	CCGGTACTTGTGGATTCAGG	60	20	129	82347	82475	AGACCTGGTCCTTTTACCCG	60.004	20	CGGTACTTGTGGATTCAGGG	60	20	132	82343	82474	AGACCTGGTCCTTTTACCCG	60.004	20	CCGGTACTTGTGGATTCAGG	60	20	133	82343	82475
NC_029943.1	61	p2	(AT)7	14	118304	118317	CTGGTCCTTTTACCCGGACT	60.004	20	CCGGTACTTGTGGATTCAGG	60	20	129	82347	82475	AGACCTGGTCCTTTTACCCG	60.004	20	CGGTACTTGTGGATTCAGGG	60	20	132	82343	82474	AGACCTGGTCCTTTTACCCG	60.004	20	CCGGTACTTGTGGATTCAGG	60	20	133	82343	82475
NC_029943.1	62	p1	(T)14	14	118421	118434	CTGGTCCTTTTACCCGGACT	60.004	20	CCGGTACTTGTGGATTCAGG	60	20	129	82347	82475	AGACCTGGTCCTTTTACCCG	60.004	20	CGGTACTTGTGGATTCAGGG	60	20	132	82343	82474	AGACCTGGTCCTTTTACCCG	60.004	20	CCGGTACTTGTGGATTCAGG	60	20	133	82343	82475
NC_029943.1	63	p1	(A)11	11	125268	125278	CTGGTCCTTTTACCCGGACT	60.004	20	CCGGTACTTGTGGATTCAGG	60	20	129	82347	82475	AGACCTGGTCCTTTTACCCG	60.004	20	CGGTACTTGTGGATTCAGGG	60	20	132	82343	82474	AGACCTGGTCCTTTTACCCG	60.004	20	CCGGTACTTGTGGATTCAGG	60	20	133	82343	82475
NC_029943.1	64	p1	(A)12	12	125407	125418	CTGGTCCTTTTACCCGGACT	60.004	20	CCGGTACTTGTGGATTCAGG	60	20	129	82347	82475	AGACCTGGTCCTTTTACCCG	60.004	20	CGGTACTTGTGGATTCAGGG	60	20	132	82343	82474	AGACCTGGTCCTTTTACCCG	60.004	20	CCGGTACTTGTGGATTCAGG	60	20	133	82343	82475
NC_029943.1	65	p1	(T)10	10	128027	128036	CTGGTCCTTTTACCCGGACT	60.004	20	CCGGTACTTGTGGATTCAGG	60	20	129	82347	82475	AGACCTGGTCCTTTTACCCG	60.004	20	CGGTACTTGTGGATTCAGGG	60	20	132	82343	82474	AGACCTGGTCCTTTTACCCG	60.004	20	CCGGTACTTGTGGATTCAGG	60	20	133	82343	82475
NC_029943.1	66	p1	(A)13	13	131853	131865	CTGGTCCTTTTACCCGGACT	60.004	20	CCGGTACTTGTGGATTCAGG	60	20	129	82347	82475	AGACCTGGTCCTTTTACCCG	60.004	20	CGGTACTTGTGGATTCAGGG	60	20	132	82343	82474	AGACCTGGTCCTTTTACCCG	60.004	20	CCGGTACTTGTGGATTCAGG	60	20	133	82343	82475
NC_029943.1	67	p1	(T)13	13	133405	133417	CTGGTCCTTTTACCCGGACT	60.004	20	CCGGTACTTGTGGATTCAGG	60	20	129	82347	82475	AGACCTGGTCCTTTTACCCG	60.004	20	CGGTACTTGTGGATTCAGGG	60	20	132	82343	82474	AGACCTGGTCCTTTTACCCG	60.004	20	CCGGTACTTGTGGATTCAGG	60	20	133	82343	82475
NC_029943.1	68	p1	(T)10	10	154090	154099	CTGGTCCTTTTACCCGGACT	60.004	20	CCGGTACTTGTGGATTCAGG	60	20	129	82347	82475	AGACCTGGTCCTTTTACCCG	60.004	20	CGGTACTTGTGGATTCAGGG	60	20	132	82343	82474	AGACCTGGTCCTTTTACCCG	60.004	20	CCGGTACTTGTGGATTCAGG	60	20	133	82343	82475
NC_029942.1	1	p1	(A)11	11	4025	4035	CTGGTCCTTTTACCCGGACT	60.004	20	CCGGTACTTGTGGATTCAGG	60	20	129	81794	81922	AGACCTGGTCCTTTTACCCG	60.004	20	CGGTACTTGTGGATTCAGGG	60	20	132	81790	81921	AGACCTGGTCCTTTTACCCG	60.004	20	CCGGTACTTGTGGATTCAGG	60	20	133	81790	81922
NC_029942.1	2	p1	(A)12	12	4861	4872	CTGGTCCTTTTACCCGGACT	60.004	20	CCGGTACTTGTGGATTCAGG	60	20	129	81794	81922	AGACCTGGTCCTTTTACCCG	60.004	20	CGGTACTTGTGGATTCAGGG	60	20	132	81790	81921	AGACCTGGTCCTTTTACCCG	60.004	20	CCGGTACTTGTGGATTCAGG	60	20	133	81790	81922
NC_029942.1	3	p1	(T)11	11	7459	7469	CTGGTCCTTTTACCCGGACT	60.004	20	CCGGTACTTGTGGATTCAGG	60	20	129	81794	81922	AGACCTGGTCCTTTTACCCG	60.004	20	CGGTACTTGTGGATTCAGGG	60	20	132	81790	81921	AGACCTGGTCCTTTTACCCG	60.004	20	CCGGTACTTGTGGATTCAGG	60	20	133	81790	81922
NC_029942.1	4	p1	(A)11	11	8024	8034	CTGGTCCTTTTACCCGGACT	60.004	20	CCGGTACTTGTGGATTCAGG	60	20	129	81794	81922	AGACCTGGTCCTTTTACCCG	60.004	20	CGGTACTTGTGGATTCAGGG	60	20	132	81790	81921	AGACCTGGTCCTTTTACCCG	60.004	20	CCGGTACTTGTGGATTCAGG	60	20	133	81790	81922
NC_029942.1	5	c	(A)10ggggtctcaaga(T)11	33	8568	8600	CTGGTCCTTTTACCCGGACT	60.004	20	CCGGTACTTGTGGATTCAGG	60	20	129	81794	81922	AGACCTGGTCCTTTTACCCG	60.004	20	CGGTACTTGTGGATTCAGGG	60	20	132	81790	81921	AGACCTGGTCCTTTTACCCG	60.004	20	CCGGTACTTGTGGATTCAGG	60	20	133	81790	81922
NC_029942.1	6	p1	(A)15	15	8792	8806	CTGGTCCTTTTACCCGGACT	60.004	20	CCGGTACTTGTGGATTCAGG	60	20	129	81794	81922	AGACCTGGTCCTTTTACCCG	60.004	20	CGGTACTTGTGGATTCAGGG	60	20	132	81790	81921	AGACCTGGTCCTTTTACCCG	60.004	20	CCGGTACTTGTGGATTCAGG	60	20	133	81790	81922
NC_029942.1	7	p1	(T)10	10	10050	10059	CTGGTCCTTTTACCCGGACT	60.004	20	CCGGTACTTGTGGATTCAGG	60	20	129	81794	81922	AGACCTGGTCCTTTTACCCG	60.004	20	CGGTACTTGTGGATTCAGGG	60	20	132	81790	81921	AGACCTGGTCCTTTTACCCG	60.004	20	CCGGTACTTGTGGATTCAGG	60	20	133	81790	81922
NC_029942.1	8	p1	(A)10	10	13663	13672	CTGGTCCTTTTACCCGGACT	60.004	20	CCGGTACTTGTGGATTCAGG	60	20	129	81794	81922	AGACCTGGTCCTTTTACCCG	60.004	20	CGGTACTTGTGGATTCAGGG	60	20	132	81790	81921	AGACCTGGTCCTTTTACCCG	60.004	20	CCGGTACTTGTGGATTCAGG	60	20	133	81790	81922
NC_029942.1	9	p1	(A)13	13	15053	15065	CTGGTCCTTTTACCCGGACT	60.004	20	CCGGTACTTGTGGATTCAGG	60	20	129	81794	81922	AGACCTGGTCCTTTTACCCG	60.004	20	CGGTACTTGTGGATTCAGGG	60	20	132	81790	81921	AGACCTGGTCCTTTTACCCG	60.004	20	CCGGTACTTGTGGATTCAGG	60	20	133	81790	81922
NC_029942.1	10	p1	(T)10	10	18840	18849	CTGGTCCTTTTACCCGGACT	60.004	20	CCGGTACTTGTGGATTCAGG	60	20	129	81794	81922	AGACCTGGTCCTTTTACCCG	60.004	20	CGGTACTTGTGGATTCAGGG	60	20	132	81790	81921	AGACCTGGTCCTTTTACCCG	60.004	20	CCGGTACTTGTGGATTCAGG	60	20	133	81790	81922
NC_029942.1	11	p1	(T)10	10	22979	22988	CTGGTCCTTTTACCCGGACT	60.004	20	CCGGTACTTGTGGATTCAGG	60	20	129	81794	81922	AGACCTGGTCCTTTTACCCG	60.004	20	CGGTACTTGTGGATTCAGGG	60	20	132	81790	81921	AGACCTGGTCCTTTTACCCG	60.004	20	CCGGTACTTGTGGATTCAGG	60	20	133	81790	81922
NC_029942.1	12	p1	(T)10	10	26627	26636	CTGGTCCTTTTACCCGGACT	60.004	20	CCGGTACTTGTGGATTCAGG	60	20	129	81794	81922	AGACCTGGTCCTTTTACCCG	60.004	20	CGGTACTTGTGGATTCAGGG	60	20	132	81790	81921	AGACCTGGTCCTTTTACCCG	60.004	20	CCGGTACTTGTGGATTCAGG	60	20	133	81790	81922
NC_029942.1	13	p1	(T)10	10	29545	29554	CTGGTCCTTTTACCCGGACT	60.004	20	CCGGTACTTGTGGATTCAGG	60	20	129	81794	81922	AGACCTGGTCCTTTTACCCG	60.004	20	CGGTACTTGTGGATTCAGGG	60	20	132	81790	81921	AGACCTGGTCCTTTTACCCG	60.004	20	CCGGTACTTGTGGATTCAGG	60	20	133	81790	81922
NC_029942.1	14	p1	(T)11	11	30261	30271	CTGGTCCTTTTACCCGGACT	60.004	20	CCGGTACTTGTGGATTCAGG	60	20	129	81794	81922	AGACCTGGTCCTTTTACCCG	60.004	20	CGGTACTTGTGGATTCAGGG	60	20	132	81790	81921	AGACCTGGTCCTTTTACCCG	60.004	20	CCGGTACTTGTGGATTCAGG	60	20	133	81790	81922
NC_029942.1	15	p1	(T)12	12	31689	31700	CTGGTCCTTTTACCCGGACT	60.004	20	CCGGTACTTGTGGATTCAGG	60	20	129	81794	81922	AGACCTGGTCCTTTTACCCG	60.004	20	CGGTACTTGTGGATTCAGGG	60	20	132	81790	81921	AGACCTGGTCCTTTTACCCG	60.004	20	CCGGTACTTGTGGATTCAGG	60	20	133	81790	81922
NC_029942.1	16	p1	(G)11	11	35487	35497	CTGGTCCTTTTACCCGGACT	60.004	20	CCGGTACTTGTGGATTCAGG	60	20	129	81794	81922	AGACCTGGTCCTTTTACCCG	60.004	20	CGGTACTTGTGGATTCAGGG	60	20	132	81790	81921	AGACCTGGTCCTTTTACCCG	60.004	20	CCGGTACTTGTGGATTCAGG	60	20	133	81790	81922
NC_029942.1	17	p1	(T)10	10	36922	36931	CTGGTCCTTTTACCCGGACT	60.004	20	CCGGTACTTGTGGATTCAGG	60	20	129	81794	81922	AGACCTGGTCCTTTTACCCG	60.004	20	CGGTACTTGTGGATTCAGGG	60	20	132	81790	81921	AGACCTGGTCCTTTTACCCG	60.004	20	CCGGTACTTGTGGATTCAGG	60	20	133	81790	81922
NC_029942.1	18	p1	(A)10	10	38512	38521	CTGGTCCTTTTACCCGGACT	60.004	20	CCGGTACTTGTGGATTCAGG	60	20	129	81794	81922	AGACCTGGTCCTTTTACCCG	60.004	20	CGGTACTTGTGGATTCAGGG	60	20	132	81790	81921	AGACCTGGTCCTTTTACCCG	60.004	20	CCGGTACTTGTGGATTCAGG	60	20	133	81790	81922
NC_029942.1	19	p1	(C)10	10	41479	41488	CTGGTCCTTTTACCCGGACT	60.004	20	CCGGTACTTGTGGATTCAGG	60	20	129	81794	81922	AGACCTGGTCCTTTTACCCG	60.004	20	CGGTACTTGTGGATTCAGGG	60	20	132	81790	81921	AGACCTGGTCCTTTTACCCG	60.004	20	CCGGTACTTGTGGATTCAGG	60	20	133	81790	81922
NC_029942.1	20	p1	(T)10	10	43108	43117	CTGGTCCTTTTACCCGGACT	60.004	20	CCGGTACTTGTGGATTCAGG	60	20	129	81794	81922	AGACCTGGTCCTTTTACCCG	60.004	20	CGGTACTTGTGGATTCAGGG	60	20	132	81790	81921	AGACCTGGTCCTTTTACCCG	60.004	20	CCGGTACTTGTGGATTCAGG	60	20	133	81790	81922
NC_029942.1	21	p1	(A)13	13	43708	43720	CTGGTCCTTTTACCCGGACT	60.004	20	CCGGTACTTGTGGATTCAGG	60	20	129	81794	81922	AGACCTGGTCCTTTTACCCG	60.004	20	CGGTACTTGTGGATTCAGGG	60	20	132	81790	81921	AGACCTGGTCCTTTTACCCG	60.004	20	CCGGTACTTGTGGATTCAGG	60	20	133	81790	81922
NC_029942.1	22	c	(T)10caaaaaaacaacaattttctttctatccggaagcgtgtgcccttctcgtaagactgag(A)12	80	45534	45613	CTGGTCCTTTTACCCGGACT	60.004	20	CCGGTACTTGTGGATTCAGG	60	20	129	81794	81922	AGACCTGGTCCTTTTACCCG	60.004	20	CGGTACTTGTGGATTCAGGG	60	20	132	81790	81921	AGACCTGGTCCTTTTACCCG	60.004	20	CCGGTACTTGTGGATTCAGG	60	20	133	81790	81922
NC_029942.1	23	p1	(A)10	10	45859	45868	CTGGTCCTTTTACCCGGACT	60.004	20	CCGGTACTTGTGGATTCAGG	60	20	129	81794	81922	AGACCTGGTCCTTTTACCCG	60.004	20	CGGTACTTGTGGATTCAGGG	60	20	132	81790	81921	AGACCTGGTCCTTTTACCCG	60.004	20	CCGGTACTTGTGGATTCAGG	60	20	133	81790	81922
NC_029942.1	24	p1	(T)10	10	47613	47622	CTGGTCCTTTTACCCGGACT	60.004	20	CCGGTACTTGTGGATTCAGG	60	20	129	81794	81922	AGACCTGGTCCTTTTACCCG	60.004	20	CGGTACTTGTGGATTCAGGG	60	20	132	81790	81921	AGACCTGGTCCTTTTACCCG	60.004	20	CCGGTACTTGTGGATTCAGG	60	20	133	81790	81922
NC_029942.1	25	p1	(T)10	10	48324	48333	CTGGTCCTTTTACCCGGACT	60.004	20	CCGGTACTTGTGGATTCAGG	60	20	129	81794	81922	AGACCTGGTCCTTTTACCCG	60.004	20	CGGTACTTGTGGATTCAGGG	60	20	132	81790	81921	AGACCTGGTCCTTTTACCCG	60.004	20	CCGGTACTTGTGGATTCAGG	60	20	133	81790	81922
NC_029942.1	26	p2	(TA)6	12	49903	49914	CTGGTCCTTTTACCCGGACT	60.004	20	CCGGTACTTGTGGATTCAGG	60	20	129	81794	81922	AGACCTGGTCCTTTTACCCG	60.004	20	CGGTACTTGTGGATTCAGGG	60	20	132	81790	81921	AGACCTGGTCCTTTTACCCG	60.004	20	CCGGTACTTGTGGATTCAGG	60	20	133	81790	81922
NC_029942.1	27	p1	(T)10	10	50544	50553	CTGGTCCTTTTACCCGGACT	60.004	20	CCGGTACTTGTGGATTCAGG	60	20	129	81794	81922	AGACCTGGTCCTTTTACCCG	60.004	20	CGGTACTTGTGGATTCAGGG	60	20	132	81790	81921	AGACCTGGTCCTTTTACCCG	60.004	20	CCGGTACTTGTGGATTCAGG	60	20	133	81790	81922
NC_029942.1	28	p1	(A)11	11	53216	53226	CTGGTCCTTTTACCCGGACT	60.004	20	CCGGTACTTGTGGATTCAGG	60	20	129	81794	81922	AGACCTGGTCCTTTTACCCG	60.004	20	CGGTACTTGTGGATTCAGGG	60	20	132	81790	81921	AGACCTGGTCCTTTTACCCG	60.004	20	CCGGTACTTGTGGATTCAGG	60	20	133	81790	81922
NC_029942.1	29	p1	(T)13	13	54011	54023	CTGGTCCTTTTACCCGGACT	60.004	20	CCGGTACTTGTGGATTCAGG	60	20	129	81794	81922	AGACCTGGTCCTTTTACCCG	60.004	20	CGGTACTTGTGGATTCAGGG	60	20	132	81790	81921	AGACCTGGTCCTTTTACCCG	60.004	20	CCGGTACTTGTGGATTCAGG	60	20	133	81790	81922
NC_029942.1	30	p1	(T)10	10	54143	54152	CTGGTCCTTTTACCCGGACT	60.004	20	CCGGTACTTGTGGATTCAGG	60	20	129	81794	81922	AGACCTGGTCCTTTTACCCG	60.004	20	CGGTACTTGTGGATTCAGGG	60	20	132	81790	81921	AGACCTGGTCCTTTTACCCG	60.004	20	CCGGTACTTGTGGATTCAGG	60	20	133	81790	81922
NC_029942.1	31	p1	(A)13	13	57575	57587	CTGGTCCTTTTACCCGGACT	60.004	20	CCGGTACTTGTGGATTCAGG	60	20	129	81794	81922	AGACCTGGTCCTTTTACCCG	60.004	20	CGGTACTTGTGGATTCAGGG	60	20	132	81790	81921	AGACCTGGTCCTTTTACCCG	60.004	20	CCGGTACTTGTGGATTCAGG	60	20	133	81790	81922
NC_029942.1	32	p1	(A)14	14	61907	61920	CTGGTCCTTTTACCCGGACT	60.004	20	CCGGTACTTGTGGATTCAGG	60	20	129	81794	81922	AGACCTGGTCCTTTTACCCG	60.004	20	CGGTACTTGTGGATTCAGGG	60	20	132	81790	81921	AGACCTGGTCCTTTTACCCG	60.004	20	CCGGTACTTGTGGATTCAGG	60	20	133	81790	81922
NC_029942.1	33	p1	(T)10	10	63250	63259	CTGGTCCTTTTACCCGGACT	60.004	20	CCGGTACTTGTGGATTCAGG	60	20	129	81794	81922	AGACCTGGTCCTTTTACCCG	60.004	20	CGGTACTTGTGGATTCAGGG	60	20	132	81790	81921	AGACCTGGTCCTTTTACCCG	60.004	20	CCGGTACTTGTGGATTCAGG	60	20	133	81790	81922
NC_029942.1	34	p1	(T)10	10	65668	65677	CTGGTCCTTTTACCCGGACT	60.004	20	CCGGTACTTGTGGATTCAGG	60	20	129	81794	81922	AGACCTGGTCCTTTTACCCG	60.004	20	CGGTACTTGTGGATTCAGGG	60	20	132	81790	81921	AGACCTGGTCCTTTTACCCG	60.004	20	CCGGTACTTGTGGATTCAGG	60	20	133	81790	81922
NC_029942.1	35	p1	(A)10	10	66278	66287	CTGGTCCTTTTACCCGGACT	60.004	20	CCGGTACTTGTGGATTCAGG	60	20	129	81794	81922	AGACCTGGTCCTTTTACCCG	60.004	20	CGGTACTTGTGGATTCAGGG	60	20	132	81790	81921	AGACCTGGTCCTTTTACCCG	60.004	20	CCGGTACTTGTGGATTCAGG	60	20	133	81790	81922
NC_029942.1	36	c	(A)11gaaaatagaattttttttatttcttatttcatagtgatttatgttcatgaagagtttcc(T)13	83	66907	66989	CTGGTCCTTTTACCCGGACT	60.004	20	CCGGTACTTGTGGATTCAGG	60	20	129	81794	81922	AGACCTGGTCCTTTTACCCG	60.004	20	CGGTACTTGTGGATTCAGGG	60	20	132	81790	81921	AGACCTGGTCCTTTTACCCG	60.004	20	CCGGTACTTGTGGATTCAGG	60	20	133	81790	81922
NC_029942.1	37	p1	(A)11	11	68853	68863	CTGGTCCTTTTACCCGGACT	60.004	20	CCGGTACTTGTGGATTCAGG	60	20	129	81794	81922	AGACCTGGTCCTTTTACCCG	60.004	20	CGGTACTTGTGGATTCAGGG	60	20	132	81790	81921	AGACCTGGTCCTTTTACCCG	60.004	20	CCGGTACTTGTGGATTCAGG	60	20	133	81790	81922
NC_029942.1	38	p1	(T)16	16	68998	69013	CTGGTCCTTTTACCCGGACT	60.004	20	CCGGTACTTGTGGATTCAGG	60	20	129	81794	81922	AGACCTGGTCCTTTTACCCG	60.004	20	CGGTACTTGTGGATTCAGGG	60	20	132	81790	81921	AGACCTGGTCCTTTTACCCG	60.004	20	CCGGTACTTGTGGATTCAGG	60	20	133	81790	81922
NC_029942.1	39	p1	(A)11	11	71483	71493	CTGGTCCTTTTACCCGGACT	60.004	20	CCGGTACTTGTGGATTCAGG	60	20	129	81794	81922	AGACCTGGTCCTTTTACCCG	60.004	20	CGGTACTTGTGGATTCAGGG	60	20	132	81790	81921	AGACCTGGTCCTTTTACCCG	60.004	20	CCGGTACTTGTGGATTCAGG	60	20	133	81790	81922
NC_029942.1	40	p1	(T)10	10	72038	72047	CTGGTCCTTTTACCCGGACT	60.004	20	CCGGTACTTGTGGATTCAGG	60	20	129	81794	81922	AGACCTGGTCCTTTTACCCG	60.004	20	CGGTACTTGTGGATTCAGGG	60	20	132	81790	81921	AGACCTGGTCCTTTTACCCG	60.004	20	CCGGTACTTGTGGATTCAGG	60	20	133	81790	81922
NC_029942.1	41	p1	(A)13	13	72234	72246	CTGGTCCTTTTACCCGGACT	60.004	20	CCGGTACTTGTGGATTCAGG	60	20	129	81794	81922	AGACCTGGTCCTTTTACCCG	60.004	20	CGGTACTTGTGGATTCAGGG	60	20	132	81790	81921	AGACCTGGTCCTTTTACCCG	60.004	20	CCGGTACTTGTGGATTCAGG	60	20	133	81790	81922
NC_029942.1	42	p1	(A)14	14	72780	72793	CTGGTCCTTTTACCCGGACT	60.004	20	CCGGTACTTGTGGATTCAGG	60	20	129	81794	81922	AGACCTGGTCCTTTTACCCG	60.004	20	CGGTACTTGTGGATTCAGGG	60	20	132	81790	81921	AGACCTGGTCCTTTTACCCG	60.004	20	CCGGTACTTGTGGATTCAGG	60	20	133	81790	81922
NC_029942.1	43	p1	(T)12	12	72944	72955	CTGGTCCTTTTACCCGGACT	60.004	20	CCGGTACTTGTGGATTCAGG	60	20	129	81794	81922	AGACCTGGTCCTTTTACCCG	60.004	20	CGGTACTTGTGGATTCAGGG	60	20	132	81790	81921	AGACCTGGTCCTTTTACCCG	60.004	20	CCGGTACTTGTGGATTCAGG	60	20	133	81790	81922
NC_029942.1	44	p1	(T)10	10	73673	73682	CTGGTCCTTTTACCCGGACT	60.004	20	CCGGTACTTGTGGATTCAGG	60	20	129	81794	81922	AGACCTGGTCCTTTTACCCG	60.004	20	CGGTACTTGTGGATTCAGGG	60	20	132	81790	81921	AGACCTGGTCCTTTTACCCG	60.004	20	CCGGTACTTGTGGATTCAGG	60	20	133	81790	81922
NC_029942.1	45	p1	(T)11	11	73885	73895	CTGGTCCTTTTACCCGGACT	60.004	20	CCGGTACTTGTGGATTCAGG	60	20	129	81794	81922	AGACCTGGTCCTTTTACCCG	60.004	20	CGGTACTTGTGGATTCAGGG	60	20	132	81790	81921	AGACCTGGTCCTTTTACCCG	60.004	20	CCGGTACTTGTGGATTCAGG	60	20	133	81790	81922
NC_029942.1	46	p1	(T)10	10	77745	77754	CTGGTCCTTTTACCCGGACT	60.004	20	CCGGTACTTGTGGATTCAGG	60	20	129	81794	81922	AGACCTGGTCCTTTTACCCG	60.004	20	CGGTACTTGTGGATTCAGGG	60	20	132	81790	81921	AGACCTGGTCCTTTTACCCG	60.004	20	CCGGTACTTGTGGATTCAGG	60	20	133	81790	81922
NC_029942.1	47	p1	(A)10	10	77984	77993	CTGGTCCTTTTACCCGGACT	60.004	20	CCGGTACTTGTGGATTCAGG	60	20	129	81794	81922	AGACCTGGTCCTTTTACCCG	60.004	20	CGGTACTTGTGGATTCAGGG	60	20	132	81790	81921	AGACCTGGTCCTTTTACCCG	60.004	20	CCGGTACTTGTGGATTCAGG	60	20	133	81790	81922
NC_029942.1	48	p1	(T)11	11	78117	78127	CTGGTCCTTTTACCCGGACT	60.004	20	CCGGTACTTGTGGATTCAGG	60	20	129	81794	81922	AGACCTGGTCCTTTTACCCG	60.004	20	CGGTACTTGTGGATTCAGGG	60	20	132	81790	81921	AGACCTGGTCCTTTTACCCG	60.004	20	CCGGTACTTGTGGATTCAGG	60	20	133	81790	81922
NC_029942.1	49	p1	(A)11	11	80556	80566	CTGGTCCTTTTACCCGGACT	60.004	20	CCGGTACTTGTGGATTCAGG	60	20	129	81794	81922	AGACCTGGTCCTTTTACCCG	60.004	20	CGGTACTTGTGGATTCAGGG	60	20	132	81790	81921	AGACCTGGTCCTTTTACCCG	60.004	20	CCGGTACTTGTGGATTCAGG	60	20	133	81790	81922
NC_029942.1	50	p1	(T)16	16	83143	83158	CTGGTCCTTTTACCCGGACT	60.004	20	CCGGTACTTGTGGATTCAGG	60	20	129	81794	81922	AGACCTGGTCCTTTTACCCG	60.004	20	CGGTACTTGTGGATTCAGGG	60	20	132	81790	81921	AGACCTGGTCCTTTTACCCG	60.004	20	CCGGTACTTGTGGATTCAGG	60	20	133	81790	81922
NC_029942.1	51	p1	(A)13	13	84255	84267	CTGGTCCTTTTACCCGGACT	60.004	20	CCGGTACTTGTGGATTCAGG	60	20	129	81794	81922	AGACCTGGTCCTTTTACCCG	60.004	20	CGGTACTTGTGGATTCAGGG	60	20	132	81790	81921	AGACCTGGTCCTTTTACCCG	60.004	20	CCGGTACTTGTGGATTCAGG	60	20	133	81790	81922
NC_029942.1	52	p1	(T)12	12	84883	84894	CTGGTCCTTTTACCCGGACT	60.004	20	CCGGTACTTGTGGATTCAGG	60	20	129	81794	81922	AGACCTGGTCCTTTTACCCG	60.004	20	CGGTACTTGTGGATTCAGGG	60	20	132	81790	81921	AGACCTGGTCCTTTTACCCG	60.004	20	CCGGTACTTGTGGATTCAGG	60	20	133	81790	81922
NC_029942.1	53	c	(T)14ctctcacccttccatattatccgtatccctttttgctttacaactttctgatctgattgatttctttttgtatcttatgtcaaaaata(T)10	112	85036	85147	CTGGTCCTTTTACCCGGACT	60.004	20	CCGGTACTTGTGGATTCAGG	60	20	129	81794	81922	AGACCTGGTCCTTTTACCCG	60.004	20	CGGTACTTGTGGATTCAGGG	60	20	132	81790	81921	AGACCTGGTCCTTTTACCCG	60.004	20	CCGGTACTTGTGGATTCAGG	60	20	133	81790	81922
NC_029942.1	54	p1	(A)10	10	92004	92013	CTGGTCCTTTTACCCGGACT	60.004	20	CCGGTACTTGTGGATTCAGG	60	20	129	81794	81922	AGACCTGGTCCTTTTACCCG	60.004	20	CGGTACTTGTGGATTCAGGG	60	20	132	81790	81921	AGACCTGGTCCTTTTACCCG	60.004	20	CCGGTACTTGTGGATTCAGG	60	20	133	81790	81922
NC_029942.1	55	p1	(A)13	13	112680	112692	CTGGTCCTTTTACCCGGACT	60.004	20	CCGGTACTTGTGGATTCAGG	60	20	129	81794	81922	AGACCTGGTCCTTTTACCCG	60.004	20	CGGTACTTGTGGATTCAGGG	60	20	132	81790	81921	AGACCTGGTCCTTTTACCCG	60.004	20	CCGGTACTTGTGGATTCAGG	60	20	133	81790	81922
NC_029942.1	56	p1	(T)12	12	116662	116673	CTGGTCCTTTTACCCGGACT	60.004	20	CCGGTACTTGTGGATTCAGG	60	20	129	81794	81922	AGACCTGGTCCTTTTACCCG	60.004	20	CGGTACTTGTGGATTCAGGG	60	20	132	81790	81921	AGACCTGGTCCTTTTACCCG	60.004	20	CCGGTACTTGTGGATTCAGG	60	20	133	81790	81922
NC_029942.1	57	p1	(A)10	10	116788	116797	CTGGTCCTTTTACCCGGACT	60.004	20	CCGGTACTTGTGGATTCAGG	60	20	129	81794	81922	AGACCTGGTCCTTTTACCCG	60.004	20	CGGTACTTGTGGATTCAGGG	60	20	132	81790	81921	AGACCTGGTCCTTTTACCCG	60.004	20	CCGGTACTTGTGGATTCAGG	60	20	133	81790	81922
NC_029942.1	58	p1	(T)11	11	117420	117430	CTGGTCCTTTTACCCGGACT	60.004	20	CCGGTACTTGTGGATTCAGG	60	20	129	81794	81922	AGACCTGGTCCTTTTACCCG	60.004	20	CGGTACTTGTGGATTCAGGG	60	20	132	81790	81921	AGACCTGGTCCTTTTACCCG	60.004	20	CCGGTACTTGTGGATTCAGG	60	20	133	81790	81922
NC_029942.1	59	p2	(AT)6	12	117640	117651	CTGGTCCTTTTACCCGGACT	60.004	20	CCGGTACTTGTGGATTCAGG	60	20	129	81794	81922	AGACCTGGTCCTTTTACCCG	60.004	20	CGGTACTTGTGGATTCAGGG	60	20	132	81790	81921	AGACCTGGTCCTTTTACCCG	60.004	20	CCGGTACTTGTGGATTCAGG	60	20	133	81790	81922
NC_029942.1	60	p1	(T)17	17	117761	117777	CTGGTCCTTTTACCCGGACT	60.004	20	CCGGTACTTGTGGATTCAGG	60	20	129	81794	81922	AGACCTGGTCCTTTTACCCG	60.004	20	CGGTACTTGTGGATTCAGGG	60	20	132	81790	81921	AGACCTGGTCCTTTTACCCG	60.004	20	CCGGTACTTGTGGATTCAGG	60	20	133	81790	81922
NC_029942.1	61	p1	(A)13	13	124609	124621	CTGGTCCTTTTACCCGGACT	60.004	20	CCGGTACTTGTGGATTCAGG	60	20	129	81794	81922	AGACCTGGTCCTTTTACCCG	60.004	20	CGGTACTTGTGGATTCAGGG	60	20	132	81790	81921	AGACCTGGTCCTTTTACCCG	60.004	20	CCGGTACTTGTGGATTCAGG	60	20	133	81790	81922
NC_029942.1	62	p1	(T)10	10	127397	127406	CTGGTCCTTTTACCCGGACT	60.004	20	CCGGTACTTGTGGATTCAGG	60	20	129	81794	81922	AGACCTGGTCCTTTTACCCG	60.004	20	CGGTACTTGTGGATTCAGGG	60	20	132	81790	81921	AGACCTGGTCCTTTTACCCG	60.004	20	CCGGTACTTGTGGATTCAGG	60	20	133	81790	81922
NC_029942.1	63	p1	(A)13	13	131166	131178	CTGGTCCTTTTACCCGGACT	60.004	20	CCGGTACTTGTGGATTCAGG	60	20	129	81794	81922	AGACCTGGTCCTTTTACCCG	60.004	20	CGGTACTTGTGGATTCAGGG	60	20	132	81790	81921	AGACCTGGTCCTTTTACCCG	60.004	20	CCGGTACTTGTGGATTCAGG	60	20	133	81790	81922
NC_029942.1	64	p1	(T)13	13	132742	132754	CTGGTCCTTTTACCCGGACT	60.004	20	CCGGTACTTGTGGATTCAGG	60	20	129	81794	81922	AGACCTGGTCCTTTTACCCG	60.004	20	CGGTACTTGTGGATTCAGGG	60	20	132	81790	81921	AGACCTGGTCCTTTTACCCG	60.004	20	CCGGTACTTGTGGATTCAGG	60	20	133	81790	81922
NC_029942.1	65	p1	(T)10	10	153421	153430	CTGGTCCTTTTACCCGGACT	60.004	20	CCGGTACTTGTGGATTCAGG	60	20	129	81794	81922	AGACCTGGTCCTTTTACCCG	60.004	20	CGGTACTTGTGGATTCAGGG	60	20	132	81790	81921	AGACCTGGTCCTTTTACCCG	60.004	20	CCGGTACTTGTGGATTCAGG	60	20	133	81790	81922
NC_029941.1	1	p1	(A)10	10	264	273	CTGGTCCTTTTACCCGGACT	60.004	20	CCGGTACTTGTGGATTCAGG	60	20	129	81899	82027	AGACCTGGTCCTTTTACCCG	60.004	20	CGGTACTTGTGGATTCAGGG	60	20	132	81895	82026	AGACCTGGTCCTTTTACCCG	60.004	20	CCGGTACTTGTGGATTCAGG	60	20	133	81895	82027
NC_029941.1	2	p1	(A)10	10	4025	4034	CTGGTCCTTTTACCCGGACT	60.004	20	CCGGTACTTGTGGATTCAGG	60	20	129	81899	82027	AGACCTGGTCCTTTTACCCG	60.004	20	CGGTACTTGTGGATTCAGGG	60	20	132	81895	82026	AGACCTGGTCCTTTTACCCG	60.004	20	CCGGTACTTGTGGATTCAGG	60	20	133	81895	82027
NC_029941.1	3	p1	(A)11	11	4868	4878	CTGGTCCTTTTACCCGGACT	60.004	20	CCGGTACTTGTGGATTCAGG	60	20	129	81899	82027	AGACCTGGTCCTTTTACCCG	60.004	20	CGGTACTTGTGGATTCAGGG	60	20	132	81895	82026	AGACCTGGTCCTTTTACCCG	60.004	20	CCGGTACTTGTGGATTCAGG	60	20	133	81895	82027
NC_029941.1	4	p1	(T)10	10	5618	5627	CTGGTCCTTTTACCCGGACT	60.004	20	CCGGTACTTGTGGATTCAGG	60	20	129	81899	82027	AGACCTGGTCCTTTTACCCG	60.004	20	CGGTACTTGTGGATTCAGGG	60	20	132	81895	82026	AGACCTGGTCCTTTTACCCG	60.004	20	CCGGTACTTGTGGATTCAGG	60	20	133	81895	82027
NC_029941.1	5	p1	(T)10	10	6554	6563	CTGGTCCTTTTACCCGGACT	60.004	20	CCGGTACTTGTGGATTCAGG	60	20	129	81899	82027	AGACCTGGTCCTTTTACCCG	60.004	20	CGGTACTTGTGGATTCAGGG	60	20	132	81895	82026	AGACCTGGTCCTTTTACCCG	60.004	20	CCGGTACTTGTGGATTCAGG	60	20	133	81895	82027
NC_029941.1	6	p1	(T)10	10	7486	7495	CTGGTCCTTTTACCCGGACT	60.004	20	CCGGTACTTGTGGATTCAGG	60	20	129	81899	82027	AGACCTGGTCCTTTTACCCG	60.004	20	CGGTACTTGTGGATTCAGGG	60	20	132	81895	82026	AGACCTGGTCCTTTTACCCG	60.004	20	CCGGTACTTGTGGATTCAGG	60	20	133	81895	82027
NC_029941.1	7	p1	(A)12	12	8058	8069	CTGGTCCTTTTACCCGGACT	60.004	20	CCGGTACTTGTGGATTCAGG	60	20	129	81899	82027	AGACCTGGTCCTTTTACCCG	60.004	20	CGGTACTTGTGGATTCAGGG	60	20	132	81895	82026	AGACCTGGTCCTTTTACCCG	60.004	20	CCGGTACTTGTGGATTCAGG	60	20	133	81895	82027
NC_029941.1	8	c	(A)11ggatttcttgttgtttgatttattcattttcttatgagtttctctattacagatagtgaactatgataaaagataaaat(A)11gggggtctcaaga(T)12	126	8518	8643	CTGGTCCTTTTACCCGGACT	60.004	20	CCGGTACTTGTGGATTCAGG	60	20	129	81899	82027	AGACCTGGTCCTTTTACCCG	60.004	20	CGGTACTTGTGGATTCAGGG	60	20	132	81895	82026	AGACCTGGTCCTTTTACCCG	60.004	20	CCGGTACTTGTGGATTCAGG	60	20	133	81895	82027
NC_029941.1	9	p1	(A)12	12	8835	8846	CTGGTCCTTTTACCCGGACT	60.004	20	CCGGTACTTGTGGATTCAGG	60	20	129	81899	82027	AGACCTGGTCCTTTTACCCG	60.004	20	CGGTACTTGTGGATTCAGGG	60	20	132	81895	82026	AGACCTGGTCCTTTTACCCG	60.004	20	CCGGTACTTGTGGATTCAGG	60	20	133	81895	82027
NC_029941.1	10	p1	(A)11	11	13040	13050	CTGGTCCTTTTACCCGGACT	60.004	20	CCGGTACTTGTGGATTCAGG	60	20	129	81899	82027	AGACCTGGTCCTTTTACCCG	60.004	20	CGGTACTTGTGGATTCAGGG	60	20	132	81895	82026	AGACCTGGTCCTTTTACCCG	60.004	20	CCGGTACTTGTGGATTCAGG	60	20	133	81895	82027
NC_029941.1	11	p1	(A)10	10	13699	13708	CTGGTCCTTTTACCCGGACT	60.004	20	CCGGTACTTGTGGATTCAGG	60	20	129	81899	82027	AGACCTGGTCCTTTTACCCG	60.004	20	CGGTACTTGTGGATTCAGGG	60	20	132	81895	82026	AGACCTGGTCCTTTTACCCG	60.004	20	CCGGTACTTGTGGATTCAGG	60	20	133	81895	82027
NC_029941.1	12	p1	(A)10	10	15083	15092	CTGGTCCTTTTACCCGGACT	60.004	20	CCGGTACTTGTGGATTCAGG	60	20	129	81899	82027	AGACCTGGTCCTTTTACCCG	60.004	20	CGGTACTTGTGGATTCAGGG	60	20	132	81895	82026	AGACCTGGTCCTTTTACCCG	60.004	20	CCGGTACTTGTGGATTCAGG	60	20	133	81895	82027
NC_029941.1	13	p1	(T)10	10	18867	18876	CTGGTCCTTTTACCCGGACT	60.004	20	CCGGTACTTGTGGATTCAGG	60	20	129	81899	82027	AGACCTGGTCCTTTTACCCG	60.004	20	CGGTACTTGTGGATTCAGGG	60	20	132	81895	82026	AGACCTGGTCCTTTTACCCG	60.004	20	CCGGTACTTGTGGATTCAGG	60	20	133	81895	82027
NC_029941.1	14	p1	(T)11	11	23006	23016	CTGGTCCTTTTACCCGGACT	60.004	20	CCGGTACTTGTGGATTCAGG	60	20	129	81899	82027	AGACCTGGTCCTTTTACCCG	60.004	20	CGGTACTTGTGGATTCAGGG	60	20	132	81895	82026	AGACCTGGTCCTTTTACCCG	60.004	20	CCGGTACTTGTGGATTCAGG	60	20	133	81895	82027
NC_029941.1	15	p1	(T)10	10	26655	26664	CTGGTCCTTTTACCCGGACT	60.004	20	CCGGTACTTGTGGATTCAGG	60	20	129	81899	82027	AGACCTGGTCCTTTTACCCG	60.004	20	CGGTACTTGTGGATTCAGGG	60	20	132	81895	82026	AGACCTGGTCCTTTTACCCG	60.004	20	CCGGTACTTGTGGATTCAGG	60	20	133	81895	82027
NC_029941.1	16	p1	(A)10	10	28213	28222	CTGGTCCTTTTACCCGGACT	60.004	20	CCGGTACTTGTGGATTCAGG	60	20	129	81899	82027	AGACCTGGTCCTTTTACCCG	60.004	20	CGGTACTTGTGGATTCAGGG	60	20	132	81895	82026	AGACCTGGTCCTTTTACCCG	60.004	20	CCGGTACTTGTGGATTCAGG	60	20	133	81895	82027
NC_029941.1	17	p1	(A)10	10	28337	28346	CTGGTCCTTTTACCCGGACT	60.004	20	CCGGTACTTGTGGATTCAGG	60	20	129	81899	82027	AGACCTGGTCCTTTTACCCG	60.004	20	CGGTACTTGTGGATTCAGGG	60	20	132	81895	82026	AGACCTGGTCCTTTTACCCG	60.004	20	CCGGTACTTGTGGATTCAGG	60	20	133	81895	82027
NC_029941.1	18	p1	(A)11	11	29151	29161	CTGGTCCTTTTACCCGGACT	60.004	20	CCGGTACTTGTGGATTCAGG	60	20	129	81899	82027	AGACCTGGTCCTTTTACCCG	60.004	20	CGGTACTTGTGGATTCAGGG	60	20	132	81895	82026	AGACCTGGTCCTTTTACCCG	60.004	20	CCGGTACTTGTGGATTCAGG	60	20	133	81895	82027
NC_029941.1	19	p1	(T)11	11	29571	29581	CTGGTCCTTTTACCCGGACT	60.004	20	CCGGTACTTGTGGATTCAGG	60	20	129	81899	82027	AGACCTGGTCCTTTTACCCG	60.004	20	CGGTACTTGTGGATTCAGGG	60	20	132	81895	82026	AGACCTGGTCCTTTTACCCG	60.004	20	CCGGTACTTGTGGATTCAGG	60	20	133	81895	82027
NC_029941.1	20	p1	(T)10	10	30303	30312	CTGGTCCTTTTACCCGGACT	60.004	20	CCGGTACTTGTGGATTCAGG	60	20	129	81899	82027	AGACCTGGTCCTTTTACCCG	60.004	20	CGGTACTTGTGGATTCAGGG	60	20	132	81895	82026	AGACCTGGTCCTTTTACCCG	60.004	20	CCGGTACTTGTGGATTCAGG	60	20	133	81895	82027
NC_029941.1	21	p1	(T)12	12	31729	31740	CTGGTCCTTTTACCCGGACT	60.004	20	CCGGTACTTGTGGATTCAGG	60	20	129	81899	82027	AGACCTGGTCCTTTTACCCG	60.004	20	CGGTACTTGTGGATTCAGGG	60	20	132	81895	82026	AGACCTGGTCCTTTTACCCG	60.004	20	CCGGTACTTGTGGATTCAGG	60	20	133	81895	82027
NC_029941.1	22	p1	(G)11	11	35527	35537	CTGGTCCTTTTACCCGGACT	60.004	20	CCGGTACTTGTGGATTCAGG	60	20	129	81899	82027	AGACCTGGTCCTTTTACCCG	60.004	20	CGGTACTTGTGGATTCAGGG	60	20	132	81895	82026	AGACCTGGTCCTTTTACCCG	60.004	20	CCGGTACTTGTGGATTCAGG	60	20	133	81895	82027
NC_029941.1	23	p1	(A)13	13	38559	38571	CTGGTCCTTTTACCCGGACT	60.004	20	CCGGTACTTGTGGATTCAGG	60	20	129	81899	82027	AGACCTGGTCCTTTTACCCG	60.004	20	CGGTACTTGTGGATTCAGGG	60	20	132	81895	82026	AGACCTGGTCCTTTTACCCG	60.004	20	CCGGTACTTGTGGATTCAGG	60	20	133	81895	82027
NC_029941.1	24	p1	(C)10	10	41529	41538	CTGGTCCTTTTACCCGGACT	60.004	20	CCGGTACTTGTGGATTCAGG	60	20	129	81899	82027	AGACCTGGTCCTTTTACCCG	60.004	20	CGGTACTTGTGGATTCAGGG	60	20	132	81895	82026	AGACCTGGTCCTTTTACCCG	60.004	20	CCGGTACTTGTGGATTCAGG	60	20	133	81895	82027
NC_029941.1	25	p1	(T)10	10	43173	43182	CTGGTCCTTTTACCCGGACT	60.004	20	CCGGTACTTGTGGATTCAGG	60	20	129	81899	82027	AGACCTGGTCCTTTTACCCG	60.004	20	CGGTACTTGTGGATTCAGGG	60	20	132	81895	82026	AGACCTGGTCCTTTTACCCG	60.004	20	CCGGTACTTGTGGATTCAGG	60	20	133	81895	82027
NC_029941.1	26	p1	(A)11	11	43773	43783	CTGGTCCTTTTACCCGGACT	60.004	20	CCGGTACTTGTGGATTCAGG	60	20	129	81899	82027	AGACCTGGTCCTTTTACCCG	60.004	20	CGGTACTTGTGGATTCAGGG	60	20	132	81895	82026	AGACCTGGTCCTTTTACCCG	60.004	20	CCGGTACTTGTGGATTCAGG	60	20	133	81895	82027
NC_029941.1	27	c	(T)11caaaaaaacaacaattttctttctatccggaagcgtgtgcccttctcgtaagactgag(A)13	82	45597	45678	CTGGTCCTTTTACCCGGACT	60.004	20	CCGGTACTTGTGGATTCAGG	60	20	129	81899	82027	AGACCTGGTCCTTTTACCCG	60.004	20	CGGTACTTGTGGATTCAGGG	60	20	132	81895	82026	AGACCTGGTCCTTTTACCCG	60.004	20	CCGGTACTTGTGGATTCAGG	60	20	133	81895	82027
NC_029941.1	28	p1	(A)10	10	45924	45933	CTGGTCCTTTTACCCGGACT	60.004	20	CCGGTACTTGTGGATTCAGG	60	20	129	81899	82027	AGACCTGGTCCTTTTACCCG	60.004	20	CGGTACTTGTGGATTCAGGG	60	20	132	81895	82026	AGACCTGGTCCTTTTACCCG	60.004	20	CCGGTACTTGTGGATTCAGG	60	20	133	81895	82027
NC_029941.1	29	p1	(T)11	11	47678	47688	CTGGTCCTTTTACCCGGACT	60.004	20	CCGGTACTTGTGGATTCAGG	60	20	129	81899	82027	AGACCTGGTCCTTTTACCCG	60.004	20	CGGTACTTGTGGATTCAGGG	60	20	132	81895	82026	AGACCTGGTCCTTTTACCCG	60.004	20	CCGGTACTTGTGGATTCAGG	60	20	133	81895	82027
NC_029941.1	30	p2	(TA)6	12	49970	49981	CTGGTCCTTTTACCCGGACT	60.004	20	CCGGTACTTGTGGATTCAGG	60	20	129	81899	82027	AGACCTGGTCCTTTTACCCG	60.004	20	CGGTACTTGTGGATTCAGGG	60	20	132	81895	82026	AGACCTGGTCCTTTTACCCG	60.004	20	CCGGTACTTGTGGATTCAGG	60	20	133	81895	82027
NC_029941.1	31	p1	(T)11	11	50612	50622	CTGGTCCTTTTACCCGGACT	60.004	20	CCGGTACTTGTGGATTCAGG	60	20	129	81899	82027	AGACCTGGTCCTTTTACCCG	60.004	20	CGGTACTTGTGGATTCAGGG	60	20	132	81895	82026	AGACCTGGTCCTTTTACCCG	60.004	20	CCGGTACTTGTGGATTCAGG	60	20	133	81895	82027
NC_029941.1	32	p1	(T)14	14	54068	54081	CTGGTCCTTTTACCCGGACT	60.004	20	CCGGTACTTGTGGATTCAGG	60	20	129	81899	82027	AGACCTGGTCCTTTTACCCG	60.004	20	CGGTACTTGTGGATTCAGGG	60	20	132	81895	82026	AGACCTGGTCCTTTTACCCG	60.004	20	CCGGTACTTGTGGATTCAGG	60	20	133	81895	82027
NC_029941.1	33	p1	(T)10	10	54202	54211	CTGGTCCTTTTACCCGGACT	60.004	20	CCGGTACTTGTGGATTCAGG	60	20	129	81899	82027	AGACCTGGTCCTTTTACCCG	60.004	20	CGGTACTTGTGGATTCAGGG	60	20	132	81895	82026	AGACCTGGTCCTTTTACCCG	60.004	20	CCGGTACTTGTGGATTCAGG	60	20	133	81895	82027
NC_029941.1	34	c	(A)12(G)10	22	57634	57655	CTGGTCCTTTTACCCGGACT	60.004	20	CCGGTACTTGTGGATTCAGG	60	20	129	81899	82027	AGACCTGGTCCTTTTACCCG	60.004	20	CGGTACTTGTGGATTCAGGG	60	20	132	81895	82026	AGACCTGGTCCTTTTACCCG	60.004	20	CCGGTACTTGTGGATTCAGG	60	20	133	81895	82027
NC_029941.1	35	p1	(A)15	15	61962	61976	CTGGTCCTTTTACCCGGACT	60.004	20	CCGGTACTTGTGGATTCAGG	60	20	129	81899	82027	AGACCTGGTCCTTTTACCCG	60.004	20	CGGTACTTGTGGATTCAGGG	60	20	132	81895	82026	AGACCTGGTCCTTTTACCCG	60.004	20	CCGGTACTTGTGGATTCAGG	60	20	133	81895	82027
NC_029941.1	36	p1	(T)11	11	63283	63293	CTGGTCCTTTTACCCGGACT	60.004	20	CCGGTACTTGTGGATTCAGG	60	20	129	81899	82027	AGACCTGGTCCTTTTACCCG	60.004	20	CGGTACTTGTGGATTCAGGG	60	20	132	81895	82026	AGACCTGGTCCTTTTACCCG	60.004	20	CCGGTACTTGTGGATTCAGG	60	20	133	81895	82027
NC_029941.1	37	p1	(A)10	10	65338	65347	CTGGTCCTTTTACCCGGACT	60.004	20	CCGGTACTTGTGGATTCAGG	60	20	129	81899	82027	AGACCTGGTCCTTTTACCCG	60.004	20	CGGTACTTGTGGATTCAGGG	60	20	132	81895	82026	AGACCTGGTCCTTTTACCCG	60.004	20	CCGGTACTTGTGGATTCAGG	60	20	133	81895	82027
NC_029941.1	38	p1	(T)11	11	65695	65705	CTGGTCCTTTTACCCGGACT	60.004	20	CCGGTACTTGTGGATTCAGG	60	20	129	81899	82027	AGACCTGGTCCTTTTACCCG	60.004	20	CGGTACTTGTGGATTCAGGG	60	20	132	81895	82026	AGACCTGGTCCTTTTACCCG	60.004	20	CCGGTACTTGTGGATTCAGG	60	20	133	81895	82027
NC_029941.1	39	p1	(A)10	10	66306	66315	CTGGTCCTTTTACCCGGACT	60.004	20	CCGGTACTTGTGGATTCAGG	60	20	129	81899	82027	AGACCTGGTCCTTTTACCCG	60.004	20	CGGTACTTGTGGATTCAGGG	60	20	132	81895	82026	AGACCTGGTCCTTTTACCCG	60.004	20	CCGGTACTTGTGGATTCAGG	60	20	133	81895	82027
NC_029941.1	40	c	(A)12gaaaatagaattttttttatttcttatttcatagtgatttatgttcatgaagagtttcc(T)16	87	66935	67021	CTGGTCCTTTTACCCGGACT	60.004	20	CCGGTACTTGTGGATTCAGG	60	20	129	81899	82027	AGACCTGGTCCTTTTACCCG	60.004	20	CGGTACTTGTGGATTCAGGG	60	20	132	81895	82026	AGACCTGGTCCTTTTACCCG	60.004	20	CCGGTACTTGTGGATTCAGG	60	20	133	81895	82027
NC_029941.1	41	p1	(A)13	13	68263	68275	CTGGTCCTTTTACCCGGACT	60.004	20	CCGGTACTTGTGGATTCAGG	60	20	129	81899	82027	AGACCTGGTCCTTTTACCCG	60.004	20	CGGTACTTGTGGATTCAGGG	60	20	132	81895	82026	AGACCTGGTCCTTTTACCCG	60.004	20	CCGGTACTTGTGGATTCAGG	60	20	133	81895	82027
NC_029941.1	42	p1	(A)10	10	68842	68851	CTGGTCCTTTTACCCGGACT	60.004	20	CCGGTACTTGTGGATTCAGG	60	20	129	81899	82027	AGACCTGGTCCTTTTACCCG	60.004	20	CGGTACTTGTGGATTCAGGG	60	20	132	81895	82026	AGACCTGGTCCTTTTACCCG	60.004	20	CCGGTACTTGTGGATTCAGG	60	20	133	81895	82027
NC_029941.1	43	p1	(T)13	13	68986	68998	CTGGTCCTTTTACCCGGACT	60.004	20	CCGGTACTTGTGGATTCAGG	60	20	129	81899	82027	AGACCTGGTCCTTTTACCCG	60.004	20	CGGTACTTGTGGATTCAGGG	60	20	132	81895	82026	AGACCTGGTCCTTTTACCCG	60.004	20	CCGGTACTTGTGGATTCAGG	60	20	133	81895	82027
NC_029941.1	44	p1	(A)11	11	71462	71472	CTGGTCCTTTTACCCGGACT	60.004	20	CCGGTACTTGTGGATTCAGG	60	20	129	81899	82027	AGACCTGGTCCTTTTACCCG	60.004	20	CGGTACTTGTGGATTCAGGG	60	20	132	81895	82026	AGACCTGGTCCTTTTACCCG	60.004	20	CCGGTACTTGTGGATTCAGG	60	20	133	81895	82027
NC_029941.1	45	p1	(T)12	12	72017	72028	CTGGTCCTTTTACCCGGACT	60.004	20	CCGGTACTTGTGGATTCAGG	60	20	129	81899	82027	AGACCTGGTCCTTTTACCCG	60.004	20	CGGTACTTGTGGATTCAGGG	60	20	132	81895	82026	AGACCTGGTCCTTTTACCCG	60.004	20	CCGGTACTTGTGGATTCAGG	60	20	133	81895	82027
NC_029941.1	46	p1	(A)13	13	72339	72351	CTGGTCCTTTTACCCGGACT	60.004	20	CCGGTACTTGTGGATTCAGG	60	20	129	81899	82027	AGACCTGGTCCTTTTACCCG	60.004	20	CGGTACTTGTGGATTCAGGG	60	20	132	81895	82026	AGACCTGGTCCTTTTACCCG	60.004	20	CCGGTACTTGTGGATTCAGG	60	20	133	81895	82027
NC_029941.1	47	p1	(A)11	11	72886	72896	CTGGTCCTTTTACCCGGACT	60.004	20	CCGGTACTTGTGGATTCAGG	60	20	129	81899	82027	AGACCTGGTCCTTTTACCCG	60.004	20	CGGTACTTGTGGATTCAGGG	60	20	132	81895	82026	AGACCTGGTCCTTTTACCCG	60.004	20	CCGGTACTTGTGGATTCAGG	60	20	133	81895	82027
NC_029941.1	48	p1	(T)14	14	73047	73060	CTGGTCCTTTTACCCGGACT	60.004	20	CCGGTACTTGTGGATTCAGG	60	20	129	81899	82027	AGACCTGGTCCTTTTACCCG	60.004	20	CGGTACTTGTGGATTCAGGG	60	20	132	81895	82026	AGACCTGGTCCTTTTACCCG	60.004	20	CCGGTACTTGTGGATTCAGG	60	20	133	81895	82027
NC_029941.1	49	p1	(T)10	10	73780	73789	CTGGTCCTTTTACCCGGACT	60.004	20	CCGGTACTTGTGGATTCAGG	60	20	129	81899	82027	AGACCTGGTCCTTTTACCCG	60.004	20	CGGTACTTGTGGATTCAGGG	60	20	132	81895	82026	AGACCTGGTCCTTTTACCCG	60.004	20	CCGGTACTTGTGGATTCAGG	60	20	133	81895	82027
NC_029941.1	50	p1	(T)10	10	73992	74001	CTGGTCCTTTTACCCGGACT	60.004	20	CCGGTACTTGTGGATTCAGG	60	20	129	81899	82027	AGACCTGGTCCTTTTACCCG	60.004	20	CGGTACTTGTGGATTCAGGG	60	20	132	81895	82026	AGACCTGGTCCTTTTACCCG	60.004	20	CCGGTACTTGTGGATTCAGG	60	20	133	81895	82027
NC_029941.1	51	p1	(T)10	10	77851	77860	CTGGTCCTTTTACCCGGACT	60.004	20	CCGGTACTTGTGGATTCAGG	60	20	129	81899	82027	AGACCTGGTCCTTTTACCCG	60.004	20	CGGTACTTGTGGATTCAGGG	60	20	132	81895	82026	AGACCTGGTCCTTTTACCCG	60.004	20	CCGGTACTTGTGGATTCAGG	60	20	133	81895	82027
NC_029941.1	52	p1	(A)10	10	78090	78099	CTGGTCCTTTTACCCGGACT	60.004	20	CCGGTACTTGTGGATTCAGG	60	20	129	81899	82027	AGACCTGGTCCTTTTACCCG	60.004	20	CGGTACTTGTGGATTCAGGG	60	20	132	81895	82026	AGACCTGGTCCTTTTACCCG	60.004	20	CCGGTACTTGTGGATTCAGG	60	20	133	81895	82027
NC_029941.1	53	p1	(T)11	11	78223	78233	CTGGTCCTTTTACCCGGACT	60.004	20	CCGGTACTTGTGGATTCAGG	60	20	129	81899	82027	AGACCTGGTCCTTTTACCCG	60.004	20	CGGTACTTGTGGATTCAGGG	60	20	132	81895	82026	AGACCTGGTCCTTTTACCCG	60.004	20	CCGGTACTTGTGGATTCAGG	60	20	133	81895	82027
NC_029941.1	54	c	(T)10ctttcattctatatacctatcccttttttc(A)11	51	82762	82812	CTGGTCCTTTTACCCGGACT	60.004	20	CCGGTACTTGTGGATTCAGG	60	20	129	81899	82027	AGACCTGGTCCTTTTACCCG	60.004	20	CGGTACTTGTGGATTCAGGG	60	20	132	81895	82026	AGACCTGGTCCTTTTACCCG	60.004	20	CCGGTACTTGTGGATTCAGG	60	20	133	81895	82027
NC_029941.1	55	p1	(T)13	13	83313	83325	CTGGTCCTTTTACCCGGACT	60.004	20	CCGGTACTTGTGGATTCAGG	60	20	129	81899	82027	AGACCTGGTCCTTTTACCCG	60.004	20	CGGTACTTGTGGATTCAGGG	60	20	132	81895	82026	AGACCTGGTCCTTTTACCCG	60.004	20	CCGGTACTTGTGGATTCAGG	60	20	133	81895	82027
NC_029941.1	56	p1	(A)14	14	84422	84435	CTGGTCCTTTTACCCGGACT	60.004	20	CCGGTACTTGTGGATTCAGG	60	20	129	81899	82027	AGACCTGGTCCTTTTACCCG	60.004	20	CGGTACTTGTGGATTCAGGG	60	20	132	81895	82026	AGACCTGGTCCTTTTACCCG	60.004	20	CCGGTACTTGTGGATTCAGG	60	20	133	81895	82027
NC_029941.1	57	p1	(T)12	12	85051	85062	CTGGTCCTTTTACCCGGACT	60.004	20	CCGGTACTTGTGGATTCAGG	60	20	129	81899	82027	AGACCTGGTCCTTTTACCCG	60.004	20	CGGTACTTGTGGATTCAGGG	60	20	132	81895	82026	AGACCTGGTCCTTTTACCCG	60.004	20	CCGGTACTTGTGGATTCAGG	60	20	133	81895	82027
NC_029941.1	58	p1	(T)10	10	85301	85310	CTGGTCCTTTTACCCGGACT	60.004	20	CCGGTACTTGTGGATTCAGG	60	20	129	81899	82027	AGACCTGGTCCTTTTACCCG	60.004	20	CGGTACTTGTGGATTCAGGG	60	20	132	81895	82026	AGACCTGGTCCTTTTACCCG	60.004	20	CCGGTACTTGTGGATTCAGG	60	20	133	81895	82027
NC_029941.1	59	p1	(T)10	10	85578	85587	CTGGTCCTTTTACCCGGACT	60.004	20	CCGGTACTTGTGGATTCAGG	60	20	129	81899	82027	AGACCTGGTCCTTTTACCCG	60.004	20	CGGTACTTGTGGATTCAGGG	60	20	132	81895	82026	AGACCTGGTCCTTTTACCCG	60.004	20	CCGGTACTTGTGGATTCAGG	60	20	133	81895	82027
NC_029941.1	60	p1	(A)13	13	112798	112810	CTGGTCCTTTTACCCGGACT	60.004	20	CCGGTACTTGTGGATTCAGG	60	20	129	81899	82027	AGACCTGGTCCTTTTACCCG	60.004	20	CGGTACTTGTGGATTCAGGG	60	20	132	81895	82026	AGACCTGGTCCTTTTACCCG	60.004	20	CCGGTACTTGTGGATTCAGG	60	20	133	81895	82027
NC_029941.1	61	p1	(T)11	11	116786	116796	CTGGTCCTTTTACCCGGACT	60.004	20	CCGGTACTTGTGGATTCAGG	60	20	129	81899	82027	AGACCTGGTCCTTTTACCCG	60.004	20	CGGTACTTGTGGATTCAGGG	60	20	132	81895	82026	AGACCTGGTCCTTTTACCCG	60.004	20	CCGGTACTTGTGGATTCAGG	60	20	133	81895	82027
NC_029941.1	62	p1	(A)12	12	116911	116922	CTGGTCCTTTTACCCGGACT	60.004	20	CCGGTACTTGTGGATTCAGG	60	20	129	81899	82027	AGACCTGGTCCTTTTACCCG	60.004	20	CGGTACTTGTGGATTCAGGG	60	20	132	81895	82026	AGACCTGGTCCTTTTACCCG	60.004	20	CCGGTACTTGTGGATTCAGG	60	20	133	81895	82027
NC_029941.1	63	p1	(T)11	11	117556	117566	CTGGTCCTTTTACCCGGACT	60.004	20	CCGGTACTTGTGGATTCAGG	60	20	129	81899	82027	AGACCTGGTCCTTTTACCCG	60.004	20	CGGTACTTGTGGATTCAGGG	60	20	132	81895	82026	AGACCTGGTCCTTTTACCCG	60.004	20	CCGGTACTTGTGGATTCAGG	60	20	133	81895	82027
NC_029941.1	64	p2	(AT)8	16	117776	117791	CTGGTCCTTTTACCCGGACT	60.004	20	CCGGTACTTGTGGATTCAGG	60	20	129	81899	82027	AGACCTGGTCCTTTTACCCG	60.004	20	CGGTACTTGTGGATTCAGGG	60	20	132	81895	82026	AGACCTGGTCCTTTTACCCG	60.004	20	CCGGTACTTGTGGATTCAGG	60	20	133	81895	82027
NC_029941.1	65	p1	(T)13	13	117901	117913	CTGGTCCTTTTACCCGGACT	60.004	20	CCGGTACTTGTGGATTCAGG	60	20	129	81899	82027	AGACCTGGTCCTTTTACCCG	60.004	20	CGGTACTTGTGGATTCAGGG	60	20	132	81895	82026	AGACCTGGTCCTTTTACCCG	60.004	20	CCGGTACTTGTGGATTCAGG	60	20	133	81895	82027
NC_029941.1	66	p1	(A)13	13	124742	124754	CTGGTCCTTTTACCCGGACT	60.004	20	CCGGTACTTGTGGATTCAGG	60	20	129	81899	82027	AGACCTGGTCCTTTTACCCG	60.004	20	CGGTACTTGTGGATTCAGGG	60	20	132	81895	82026	AGACCTGGTCCTTTTACCCG	60.004	20	CCGGTACTTGTGGATTCAGG	60	20	133	81895	82027
NC_029941.1	67	p1	(T)10	10	127525	127534	CTGGTCCTTTTACCCGGACT	60.004	20	CCGGTACTTGTGGATTCAGG	60	20	129	81899	82027	AGACCTGGTCCTTTTACCCG	60.004	20	CGGTACTTGTGGATTCAGGG	60	20	132	81895	82026	AGACCTGGTCCTTTTACCCG	60.004	20	CCGGTACTTGTGGATTCAGG	60	20	133	81895	82027
NC_029941.1	68	p1	(A)16	16	131282	131297	CTGGTCCTTTTACCCGGACT	60.004	20	CCGGTACTTGTGGATTCAGG	60	20	129	81899	82027	AGACCTGGTCCTTTTACCCG	60.004	20	CGGTACTTGTGGATTCAGGG	60	20	132	81895	82026	AGACCTGGTCCTTTTACCCG	60.004	20	CCGGTACTTGTGGATTCAGG	60	20	133	81895	82027
NC_029941.1	69	p1	(T)13	13	132864	132876	CTGGTCCTTTTACCCGGACT	60.004	20	CCGGTACTTGTGGATTCAGG	60	20	129	81899	82027	AGACCTGGTCCTTTTACCCG	60.004	20	CGGTACTTGTGGATTCAGGG	60	20	132	81895	82026	AGACCTGGTCCTTTTACCCG	60.004	20	CCGGTACTTGTGGATTCAGG	60	20	133	81895	82027
NC_029829.1	1	p1	(A)10	10	2637	2646	TCTGCAAGATCTGGGTCACA	59.999	20	GAGCAGAACAAAAGACGGGA	60.007	20	238	15992	16229	TCTGCAAGATCTGGGTCACA	59.999	20	CTATATGACGGGGTTGCCTG	59.988	20	135	15992	16126	CTAGATGAGCAAGCCCGGTA	60.01	20	TGGAGCTTATCGGCAGAAAC	59.995	20	273	21104	21376
NC_029829.1	2	p1	(A)10	10	3681	3690	TCTGCAAGATCTGGGTCACA	59.999	20	GAGCAGAACAAAAGACGGGA	60.007	20	238	15992	16229	TCTGCAAGATCTGGGTCACA	59.999	20	CTATATGACGGGGTTGCCTG	59.988	20	135	15992	16126	CTAGATGAGCAAGCCCGGTA	60.01	20	TGGAGCTTATCGGCAGAAAC	59.995	20	273	21104	21376
NC_029829.1	3	p2	(TA)9	18	4803	4820	TCTGCAAGATCTGGGTCACA	59.999	20	GAGCAGAACAAAAGACGGGA	60.007	20	238	15992	16229	TCTGCAAGATCTGGGTCACA	59.999	20	CTATATGACGGGGTTGCCTG	59.988	20	135	15992	16126	CTAGATGAGCAAGCCCGGTA	60.01	20	TGGAGCTTATCGGCAGAAAC	59.995	20	273	21104	21376
NC_029829.1	4	p1	(A)11	11	5947	5957	TCTGCAAGATCTGGGTCACA	59.999	20	GAGCAGAACAAAAGACGGGA	60.007	20	238	15992	16229	TCTGCAAGATCTGGGTCACA	59.999	20	CTATATGACGGGGTTGCCTG	59.988	20	135	15992	16126	CTAGATGAGCAAGCCCGGTA	60.01	20	TGGAGCTTATCGGCAGAAAC	59.995	20	273	21104	21376
NC_029829.1	5	p1	(T)11	11	6315	6325	TCTGCAAGATCTGGGTCACA	59.999	20	GAGCAGAACAAAAGACGGGA	60.007	20	238	15992	16229	TCTGCAAGATCTGGGTCACA	59.999	20	CTATATGACGGGGTTGCCTG	59.988	20	135	15992	16126	CTAGATGAGCAAGCCCGGTA	60.01	20	TGGAGCTTATCGGCAGAAAC	59.995	20	273	21104	21376
NC_029829.1	6	p1	(T)10	10	12449	12458	TCTGCAAGATCTGGGTCACA	59.999	20	GAGCAGAACAAAAGACGGGA	60.007	20	238	15992	16229	TCTGCAAGATCTGGGTCACA	59.999	20	CTATATGACGGGGTTGCCTG	59.988	20	135	15992	16126	CTAGATGAGCAAGCCCGGTA	60.01	20	TGGAGCTTATCGGCAGAAAC	59.995	20	273	21104	21376
NC_029829.1	7	c	(T)11acgaggtaccctgaaaaaattgttccgatggaacctttctaccggagattgagcggtaatacatggtccaagccattaattcctttctattca(T)11	115	16613	16727	TCTGCAAGATCTGGGTCACA	59.999	20	GAGCAGAACAAAAGACGGGA	60.007	20	238	15992	16229	TCTGCAAGATCTGGGTCACA	59.999	20	CTATATGACGGGGTTGCCTG	59.988	20	135	15992	16126	CTAGATGAGCAAGCCCGGTA	60.01	20	TGGAGCTTATCGGCAGAAAC	59.995	20	273	21104	21376
NC_029829.1	8	p1	(T)14	14	18790	18803	TCTGCAAGATCTGGGTCACA	59.999	20	GAGCAGAACAAAAGACGGGA	60.007	20	238	15992	16229	TCTGCAAGATCTGGGTCACA	59.999	20	CTATATGACGGGGTTGCCTG	59.988	20	135	15992	16126	CTAGATGAGCAAGCCCGGTA	60.01	20	TGGAGCTTATCGGCAGAAAC	59.995	20	273	21104	21376
NC_029829.1	9	p1	(C)12	12	22734	22745	TCTGCAAGATCTGGGTCACA	59.999	20	GAGCAGAACAAAAGACGGGA	60.007	20	238	15992	16229	TCTGCAAGATCTGGGTCACA	59.999	20	CTATATGACGGGGTTGCCTG	59.988	20	135	15992	16126	CTAGATGAGCAAGCCCGGTA	60.01	20	TGGAGCTTATCGGCAGAAAC	59.995	20	273	21104	21376
NC_029829.1	10	p1	(T)10	10	26505	26514	TCTGCAAGATCTGGGTCACA	59.999	20	GAGCAGAACAAAAGACGGGA	60.007	20	238	15992	16229	TCTGCAAGATCTGGGTCACA	59.999	20	CTATATGACGGGGTTGCCTG	59.988	20	135	15992	16126	CTAGATGAGCAAGCCCGGTA	60.01	20	TGGAGCTTATCGGCAGAAAC	59.995	20	273	21104	21376
NC_029829.1	11	p1	(A)11	11	27665	27675	TCTGCAAGATCTGGGTCACA	59.999	20	GAGCAGAACAAAAGACGGGA	60.007	20	238	15992	16229	TCTGCAAGATCTGGGTCACA	59.999	20	CTATATGACGGGGTTGCCTG	59.988	20	135	15992	16126	CTAGATGAGCAAGCCCGGTA	60.01	20	TGGAGCTTATCGGCAGAAAC	59.995	20	273	21104	21376
NC_029829.1	12	p2	(AT)7	14	33300	33313	TCTGCAAGATCTGGGTCACA	59.999	20	GAGCAGAACAAAAGACGGGA	60.007	20	238	15992	16229	TCTGCAAGATCTGGGTCACA	59.999	20	CTATATGACGGGGTTGCCTG	59.988	20	135	15992	16126	CTAGATGAGCAAGCCCGGTA	60.01	20	TGGAGCTTATCGGCAGAAAC	59.995	20	273	21104	21376
NC_029829.1	13	p2	(TA)12	24	34070	34093	TCTGCAAGATCTGGGTCACA	59.999	20	GAGCAGAACAAAAGACGGGA	60.007	20	238	15992	16229	TCTGCAAGATCTGGGTCACA	59.999	20	CTATATGACGGGGTTGCCTG	59.988	20	135	15992	16126	CTAGATGAGCAAGCCCGGTA	60.01	20	TGGAGCTTATCGGCAGAAAC	59.995	20	273	21104	21376
NC_029829.1	14	p2	(TA)8	16	34206	34221	TCTGCAAGATCTGGGTCACA	59.999	20	GAGCAGAACAAAAGACGGGA	60.007	20	238	15992	16229	TCTGCAAGATCTGGGTCACA	59.999	20	CTATATGACGGGGTTGCCTG	59.988	20	135	15992	16126	CTAGATGAGCAAGCCCGGTA	60.01	20	TGGAGCTTATCGGCAGAAAC	59.995	20	273	21104	21376
NC_029829.1	15	p1	(A)10	10	34427	34436	TCTGCAAGATCTGGGTCACA	59.999	20	GAGCAGAACAAAAGACGGGA	60.007	20	238	15992	16229	TCTGCAAGATCTGGGTCACA	59.999	20	CTATATGACGGGGTTGCCTG	59.988	20	135	15992	16126	CTAGATGAGCAAGCCCGGTA	60.01	20	TGGAGCTTATCGGCAGAAAC	59.995	20	273	21104	21376
NC_029829.1	16	c	(AT)12ttgatttatctatctgtatatatggataggtgcatgagcctgcatgcacattttggagt(A)10	93	37758	37850	TCTGCAAGATCTGGGTCACA	59.999	20	GAGCAGAACAAAAGACGGGA	60.007	20	238	15992	16229	TCTGCAAGATCTGGGTCACA	59.999	20	CTATATGACGGGGTTGCCTG	59.988	20	135	15992	16126	CTAGATGAGCAAGCCCGGTA	60.01	20	TGGAGCTTATCGGCAGAAAC	59.995	20	273	21104	21376
NC_029829.1	17	p1	(A)10	10	38763	38772	TCTGCAAGATCTGGGTCACA	59.999	20	GAGCAGAACAAAAGACGGGA	60.007	20	238	15992	16229	TCTGCAAGATCTGGGTCACA	59.999	20	CTATATGACGGGGTTGCCTG	59.988	20	135	15992	16126	CTAGATGAGCAAGCCCGGTA	60.01	20	TGGAGCTTATCGGCAGAAAC	59.995	20	273	21104	21376
NC_029829.1	18	p1	(T)11	11	44376	44386	TCTGCAAGATCTGGGTCACA	59.999	20	GAGCAGAACAAAAGACGGGA	60.007	20	238	15992	16229	TCTGCAAGATCTGGGTCACA	59.999	20	CTATATGACGGGGTTGCCTG	59.988	20	135	15992	16126	CTAGATGAGCAAGCCCGGTA	60.01	20	TGGAGCTTATCGGCAGAAAC	59.995	20	273	21104	21376
NC_029829.1	19	p2	(TA)9	18	48634	48651	TCTGCAAGATCTGGGTCACA	59.999	20	GAGCAGAACAAAAGACGGGA	60.007	20	238	15992	16229	TCTGCAAGATCTGGGTCACA	59.999	20	CTATATGACGGGGTTGCCTG	59.988	20	135	15992	16126	CTAGATGAGCAAGCCCGGTA	60.01	20	TGGAGCTTATCGGCAGAAAC	59.995	20	273	21104	21376
NC_029829.1	20	p2	(AT)7	14	51021	51034	TCTGCAAGATCTGGGTCACA	59.999	20	GAGCAGAACAAAAGACGGGA	60.007	20	238	15992	16229	TCTGCAAGATCTGGGTCACA	59.999	20	CTATATGACGGGGTTGCCTG	59.988	20	135	15992	16126	CTAGATGAGCAAGCCCGGTA	60.01	20	TGGAGCTTATCGGCAGAAAC	59.995	20	273	21104	21376
NC_029829.1	21	p2	(TA)6	12	68043	68054	TCTGCAAGATCTGGGTCACA	59.999	20	GAGCAGAACAAAAGACGGGA	60.007	20	238	15992	16229	TCTGCAAGATCTGGGTCACA	59.999	20	CTATATGACGGGGTTGCCTG	59.988	20	135	15992	16126	CTAGATGAGCAAGCCCGGTA	60.01	20	TGGAGCTTATCGGCAGAAAC	59.995	20	273	21104	21376
NC_029829.1	22	p1	(T)15	15	71809	71823	TCTGCAAGATCTGGGTCACA	59.999	20	GAGCAGAACAAAAGACGGGA	60.007	20	238	15992	16229	TCTGCAAGATCTGGGTCACA	59.999	20	CTATATGACGGGGTTGCCTG	59.988	20	135	15992	16126	CTAGATGAGCAAGCCCGGTA	60.01	20	TGGAGCTTATCGGCAGAAAC	59.995	20	273	21104	21376
NC_029829.1	23	p1	(A)11	11	72499	72509	TCTGCAAGATCTGGGTCACA	59.999	20	GAGCAGAACAAAAGACGGGA	60.007	20	238	15992	16229	TCTGCAAGATCTGGGTCACA	59.999	20	CTATATGACGGGGTTGCCTG	59.988	20	135	15992	16126	CTAGATGAGCAAGCCCGGTA	60.01	20	TGGAGCTTATCGGCAGAAAC	59.995	20	273	21104	21376
NC_029829.1	24	p1	(T)10	10	82645	82654	TCTGCAAGATCTGGGTCACA	59.999	20	GAGCAGAACAAAAGACGGGA	60.007	20	238	15992	16229	TCTGCAAGATCTGGGTCACA	59.999	20	CTATATGACGGGGTTGCCTG	59.988	20	135	15992	16126	CTAGATGAGCAAGCCCGGTA	60.01	20	TGGAGCTTATCGGCAGAAAC	59.995	20	273	21104	21376
NC_029829.1	25	c	(TAT)5tc(T)12	29	83172	83200	TCTGCAAGATCTGGGTCACA	59.999	20	GAGCAGAACAAAAGACGGGA	60.007	20	238	15992	16229	TCTGCAAGATCTGGGTCACA	59.999	20	CTATATGACGGGGTTGCCTG	59.988	20	135	15992	16126	CTAGATGAGCAAGCCCGGTA	60.01	20	TGGAGCTTATCGGCAGAAAC	59.995	20	273	21104	21376
NC_029829.1	26	p1	(A)10	10	84030	84039	TCTGCAAGATCTGGGTCACA	59.999	20	GAGCAGAACAAAAGACGGGA	60.007	20	238	15992	16229	TCTGCAAGATCTGGGTCACA	59.999	20	CTATATGACGGGGTTGCCTG	59.988	20	135	15992	16126	CTAGATGAGCAAGCCCGGTA	60.01	20	TGGAGCTTATCGGCAGAAAC	59.995	20	273	21104	21376
NC_029829.1	27	p1	(T)10	10	84891	84900	TCTGCAAGATCTGGGTCACA	59.999	20	GAGCAGAACAAAAGACGGGA	60.007	20	238	15992	16229	TCTGCAAGATCTGGGTCACA	59.999	20	CTATATGACGGGGTTGCCTG	59.988	20	135	15992	16126	CTAGATGAGCAAGCCCGGTA	60.01	20	TGGAGCTTATCGGCAGAAAC	59.995	20	273	21104	21376
NC_029829.1	28	p1	(A)10	10	94778	94787	TCTGCAAGATCTGGGTCACA	59.999	20	GAGCAGAACAAAAGACGGGA	60.007	20	238	15992	16229	TCTGCAAGATCTGGGTCACA	59.999	20	CTATATGACGGGGTTGCCTG	59.988	20	135	15992	16126	CTAGATGAGCAAGCCCGGTA	60.01	20	TGGAGCTTATCGGCAGAAAC	59.995	20	273	21104	21376
NC_029829.1	29	p2	(TA)8	16	96375	96390	TCTGCAAGATCTGGGTCACA	59.999	20	GAGCAGAACAAAAGACGGGA	60.007	20	238	15992	16229	TCTGCAAGATCTGGGTCACA	59.999	20	CTATATGACGGGGTTGCCTG	59.988	20	135	15992	16126	CTAGATGAGCAAGCCCGGTA	60.01	20	TGGAGCTTATCGGCAGAAAC	59.995	20	273	21104	21376
NC_029829.1	30	p1	(T)11	11	119939	119949	TCTGCAAGATCTGGGTCACA	59.999	20	GAGCAGAACAAAAGACGGGA	60.007	20	238	15992	16229	TCTGCAAGATCTGGGTCACA	59.999	20	CTATATGACGGGGTTGCCTG	59.988	20	135	15992	16126	CTAGATGAGCAAGCCCGGTA	60.01	20	TGGAGCTTATCGGCAGAAAC	59.995	20	273	21104	21376
NC_029829.1	31	p2	(AT)7	14	120747	120760	TCTGCAAGATCTGGGTCACA	59.999	20	GAGCAGAACAAAAGACGGGA	60.007	20	238	15992	16229	TCTGCAAGATCTGGGTCACA	59.999	20	CTATATGACGGGGTTGCCTG	59.988	20	135	15992	16126	CTAGATGAGCAAGCCCGGTA	60.01	20	TGGAGCTTATCGGCAGAAAC	59.995	20	273	21104	21376
NC_029829.1	32	p1	(C)12	12	125278	125289	TCTGCAAGATCTGGGTCACA	59.999	20	GAGCAGAACAAAAGACGGGA	60.007	20	238	15992	16229	TCTGCAAGATCTGGGTCACA	59.999	20	CTATATGACGGGGTTGCCTG	59.988	20	135	15992	16126	CTAGATGAGCAAGCCCGGTA	60.01	20	TGGAGCTTATCGGCAGAAAC	59.995	20	273	21104	21376
NC_029829.1	33	p2	(AT)8	16	146103	146118	TCTGCAAGATCTGGGTCACA	59.999	20	GAGCAGAACAAAAGACGGGA	60.007	20	238	15992	16229	TCTGCAAGATCTGGGTCACA	59.999	20	CTATATGACGGGGTTGCCTG	59.988	20	135	15992	16126	CTAGATGAGCAAGCCCGGTA	60.01	20	TGGAGCTTATCGGCAGAAAC	59.995	20	273	21104	21376
NC_029829.1	34	p1	(T)10	10	147707	147716	TCTGCAAGATCTGGGTCACA	59.999	20	GAGCAGAACAAAAGACGGGA	60.007	20	238	15992	16229	TCTGCAAGATCTGGGTCACA	59.999	20	CTATATGACGGGGTTGCCTG	59.988	20	135	15992	16126	CTAGATGAGCAAGCCCGGTA	60.01	20	TGGAGCTTATCGGCAGAAAC	59.995	20	273	21104	21376
NC_029434.1	1	p1	(A)12	12	7189	7200	CCCTGAATCCACAAGTACCG	60	20	GGTTCACGTAGGAATGGACG	60.007	20	163	78087	78249	CTTCGCCTCTTTGCCAATAA	59.991	20	TTCCTTTTTCACTCGGCAAG	60.003	20	256	18978	19233	GTTTCTGCCGATAAGCTCCA	59.995	20	CTATTGGGGATCCCATTTCC	59.991	20	222	21115	21336
NC_029434.1	2	p1	(T)11	11	18557	18567	CCCTGAATCCACAAGTACCG	60	20	GGTTCACGTAGGAATGGACG	60.007	20	163	78087	78249	CTTCGCCTCTTTGCCAATAA	59.991	20	TTCCTTTTTCACTCGGCAAG	60.003	20	256	18978	19233	GTTTCTGCCGATAAGCTCCA	59.995	20	CTATTGGGGATCCCATTTCC	59.991	20	222	21115	21336
NC_029434.1	3	p1	(A)10	10	29399	29408	CCCTGAATCCACAAGTACCG	60	20	GGTTCACGTAGGAATGGACG	60.007	20	163	78087	78249	CTTCGCCTCTTTGCCAATAA	59.991	20	TTCCTTTTTCACTCGGCAAG	60.003	20	256	18978	19233	GTTTCTGCCGATAAGCTCCA	59.995	20	CTATTGGGGATCCCATTTCC	59.991	20	222	21115	21336
NC_029434.1	4	p1	(A)10	10	30898	30907	CCCTGAATCCACAAGTACCG	60	20	GGTTCACGTAGGAATGGACG	60.007	20	163	78087	78249	CTTCGCCTCTTTGCCAATAA	59.991	20	TTCCTTTTTCACTCGGCAAG	60.003	20	256	18978	19233	GTTTCTGCCGATAAGCTCCA	59.995	20	CTATTGGGGATCCCATTTCC	59.991	20	222	21115	21336
NC_029434.1	5	p1	(T)13	13	41560	41572	CCCTGAATCCACAAGTACCG	60	20	GGTTCACGTAGGAATGGACG	60.007	20	163	78087	78249	CTTCGCCTCTTTGCCAATAA	59.991	20	TTCCTTTTTCACTCGGCAAG	60.003	20	256	18978	19233	GTTTCTGCCGATAAGCTCCA	59.995	20	CTATTGGGGATCCCATTTCC	59.991	20	222	21115	21336
NC_029434.1	6	p1	(A)10	10	62477	62486	CCCTGAATCCACAAGTACCG	60	20	GGTTCACGTAGGAATGGACG	60.007	20	163	78087	78249	CTTCGCCTCTTTGCCAATAA	59.991	20	TTCCTTTTTCACTCGGCAAG	60.003	20	256	18978	19233	GTTTCTGCCGATAAGCTCCA	59.995	20	CTATTGGGGATCCCATTTCC	59.991	20	222	21115	21336
NC_029434.1	7	p1	(T)10	10	84666	84675	CCCTGAATCCACAAGTACCG	60	20	GGTTCACGTAGGAATGGACG	60.007	20	163	78087	78249	CTTCGCCTCTTTGCCAATAA	59.991	20	TTCCTTTTTCACTCGGCAAG	60.003	20	256	18978	19233	GTTTCTGCCGATAAGCTCCA	59.995	20	CTATTGGGGATCCCATTTCC	59.991	20	222	21115	21336
NC_029434.1	8	p1	(A)10	10	119445	119454	CCCTGAATCCACAAGTACCG	60	20	GGTTCACGTAGGAATGGACG	60.007	20	163	78087	78249	CTTCGCCTCTTTGCCAATAA	59.991	20	TTCCTTTTTCACTCGGCAAG	60.003	20	256	18978	19233	GTTTCTGCCGATAAGCTCCA	59.995	20	CTATTGGGGATCCCATTTCC	59.991	20	222	21115	21336
NC_029434.1	9	p1	(T)10	10	123474	123483	CCCTGAATCCACAAGTACCG	60	20	GGTTCACGTAGGAATGGACG	60.007	20	163	78087	78249	CTTCGCCTCTTTGCCAATAA	59.991	20	TTCCTTTTTCACTCGGCAAG	60.003	20	256	18978	19233	GTTTCTGCCGATAAGCTCCA	59.995	20	CTATTGGGGATCCCATTTCC	59.991	20	222	21115	21336
NC_029434.1	10	p1	(T)18	18	124598	124615	CCCTGAATCCACAAGTACCG	60	20	GGTTCACGTAGGAATGGACG	60.007	20	163	78087	78249	CTTCGCCTCTTTGCCAATAA	59.991	20	TTCCTTTTTCACTCGGCAAG	60.003	20	256	18978	19233	GTTTCTGCCGATAAGCTCCA	59.995	20	CTATTGGGGATCCCATTTCC	59.991	20	222	21115	21336
NC_029434.1	11	p1	(T)11	11	125255	125265	CCCTGAATCCACAAGTACCG	60	20	GGTTCACGTAGGAATGGACG	60.007	20	163	78087	78249	CTTCGCCTCTTTGCCAATAA	59.991	20	TTCCTTTTTCACTCGGCAAG	60.003	20	256	18978	19233	GTTTCTGCCGATAAGCTCCA	59.995	20	CTATTGGGGATCCCATTTCC	59.991	20	222	21115	21336
NC_029434.1	12	p1	(A)10	10	125876	125885	CCCTGAATCCACAAGTACCG	60	20	GGTTCACGTAGGAATGGACG	60.007	20	163	78087	78249	CTTCGCCTCTTTGCCAATAA	59.991	20	TTCCTTTTTCACTCGGCAAG	60.003	20	256	18978	19233	GTTTCTGCCGATAAGCTCCA	59.995	20	CTATTGGGGATCCCATTTCC	59.991	20	222	21115	21336
NC_029434.1	13	p1	(T)13	13	126475	126487	CCCTGAATCCACAAGTACCG	60	20	GGTTCACGTAGGAATGGACG	60.007	20	163	78087	78249	CTTCGCCTCTTTGCCAATAA	59.991	20	TTCCTTTTTCACTCGGCAAG	60.003	20	256	18978	19233	GTTTCTGCCGATAAGCTCCA	59.995	20	CTATTGGGGATCCCATTTCC	59.991	20	222	21115	21336
NC_029434.1	14	p1	(T)13	13	126653	126665	CCCTGAATCCACAAGTACCG	60	20	GGTTCACGTAGGAATGGACG	60.007	20	163	78087	78249	CTTCGCCTCTTTGCCAATAA	59.991	20	TTCCTTTTTCACTCGGCAAG	60.003	20	256	18978	19233	GTTTCTGCCGATAAGCTCCA	59.995	20	CTATTGGGGATCCCATTTCC	59.991	20	222	21115	21336
NC_029434.1	15	p1	(A)10	10	126816	126825	CCCTGAATCCACAAGTACCG	60	20	GGTTCACGTAGGAATGGACG	60.007	20	163	78087	78249	CTTCGCCTCTTTGCCAATAA	59.991	20	TTCCTTTTTCACTCGGCAAG	60.003	20	256	18978	19233	GTTTCTGCCGATAAGCTCCA	59.995	20	CTATTGGGGATCCCATTTCC	59.991	20	222	21115	21336
NC_029434.1	16	p1	(A)10	10	151286	151295	CCCTGAATCCACAAGTACCG	60	20	GGTTCACGTAGGAATGGACG	60.007	20	163	78087	78249	CTTCGCCTCTTTGCCAATAA	59.991	20	TTCCTTTTTCACTCGGCAAG	60.003	20	256	18978	19233	GTTTCTGCCGATAAGCTCCA	59.995	20	CTATTGGGGATCCCATTTCC	59.991	20	222	21115	21336
NC_029432.1	1	p1	(A)11	11	1985	1995	CTGGAGTTTGCTCCCAGAAA	60	20	TGAGTTTCTCGACCCTTTGC	60.007	20	256	142149	142404	TGAGTTTCTCGACCCTTTGC	60.007	20	CTGGAGTTTGCTCCCAGAAA	60	20	256	104007	104262	TCACCCGTTTGGTCGAGTAT	60.007	20	ATGCAATGTAGGCATTCGGT	60.002	20	258	62210	62467
NC_029432.1	2	c	(T)10cttattttattctatttttttattgtattcta(AT)6	54	2104	2157	CTGGAGTTTGCTCCCAGAAA	60	20	TGAGTTTCTCGACCCTTTGC	60.007	20	256	142149	142404	TGAGTTTCTCGACCCTTTGC	60.007	20	CTGGAGTTTGCTCCCAGAAA	60	20	256	104007	104262	TCACCCGTTTGGTCGAGTAT	60.007	20	ATGCAATGTAGGCATTCGGT	60.002	20	258	62210	62467
NC_029432.1	3	p2	(TA)6	12	5432	5443	CTGGAGTTTGCTCCCAGAAA	60	20	TGAGTTTCTCGACCCTTTGC	60.007	20	256	142149	142404	TGAGTTTCTCGACCCTTTGC	60.007	20	CTGGAGTTTGCTCCCAGAAA	60	20	256	104007	104262	TCACCCGTTTGGTCGAGTAT	60.007	20	ATGCAATGTAGGCATTCGGT	60.002	20	258	62210	62467
NC_029432.1	4	p1	(C)10	10	6204	6213	CTGGAGTTTGCTCCCAGAAA	60	20	TGAGTTTCTCGACCCTTTGC	60.007	20	256	142149	142404	TGAGTTTCTCGACCCTTTGC	60.007	20	CTGGAGTTTGCTCCCAGAAA	60	20	256	104007	104262	TCACCCGTTTGGTCGAGTAT	60.007	20	ATGCAATGTAGGCATTCGGT	60.002	20	258	62210	62467
NC_029432.1	5	p1	(T)11	11	7567	7577	CTGGAGTTTGCTCCCAGAAA	60	20	TGAGTTTCTCGACCCTTTGC	60.007	20	256	142149	142404	TGAGTTTCTCGACCCTTTGC	60.007	20	CTGGAGTTTGCTCCCAGAAA	60	20	256	104007	104262	TCACCCGTTTGGTCGAGTAT	60.007	20	ATGCAATGTAGGCATTCGGT	60.002	20	258	62210	62467
NC_029432.1	6	p1	(A)13	13	8480	8492	CTGGAGTTTGCTCCCAGAAA	60	20	TGAGTTTCTCGACCCTTTGC	60.007	20	256	142149	142404	TGAGTTTCTCGACCCTTTGC	60.007	20	CTGGAGTTTGCTCCCAGAAA	60	20	256	104007	104262	TCACCCGTTTGGTCGAGTAT	60.007	20	ATGCAATGTAGGCATTCGGT	60.002	20	258	62210	62467
NC_029432.1	7	p1	(T)10	10	8722	8731	CTGGAGTTTGCTCCCAGAAA	60	20	TGAGTTTCTCGACCCTTTGC	60.007	20	256	142149	142404	TGAGTTTCTCGACCCTTTGC	60.007	20	CTGGAGTTTGCTCCCAGAAA	60	20	256	104007	104262	TCACCCGTTTGGTCGAGTAT	60.007	20	ATGCAATGTAGGCATTCGGT	60.002	20	258	62210	62467
NC_029432.1	8	c	(A)11g(A)10	22	9577	9598	CTGGAGTTTGCTCCCAGAAA	60	20	TGAGTTTCTCGACCCTTTGC	60.007	20	256	142149	142404	TGAGTTTCTCGACCCTTTGC	60.007	20	CTGGAGTTTGCTCCCAGAAA	60	20	256	104007	104262	TCACCCGTTTGGTCGAGTAT	60.007	20	ATGCAATGTAGGCATTCGGT	60.002	20	258	62210	62467
NC_029432.1	9	p1	(A)11	11	9770	9780	CTGGAGTTTGCTCCCAGAAA	60	20	TGAGTTTCTCGACCCTTTGC	60.007	20	256	142149	142404	TGAGTTTCTCGACCCTTTGC	60.007	20	CTGGAGTTTGCTCCCAGAAA	60	20	256	104007	104262	TCACCCGTTTGGTCGAGTAT	60.007	20	ATGCAATGTAGGCATTCGGT	60.002	20	258	62210	62467
NC_029432.1	10	p1	(A)14	14	10001	10014	CTGGAGTTTGCTCCCAGAAA	60	20	TGAGTTTCTCGACCCTTTGC	60.007	20	256	142149	142404	TGAGTTTCTCGACCCTTTGC	60.007	20	CTGGAGTTTGCTCCCAGAAA	60	20	256	104007	104262	TCACCCGTTTGGTCGAGTAT	60.007	20	ATGCAATGTAGGCATTCGGT	60.002	20	258	62210	62467
NC_029432.1	11	p1	(T)10	10	10509	10518	CTGGAGTTTGCTCCCAGAAA	60	20	TGAGTTTCTCGACCCTTTGC	60.007	20	256	142149	142404	TGAGTTTCTCGACCCTTTGC	60.007	20	CTGGAGTTTGCTCCCAGAAA	60	20	256	104007	104262	TCACCCGTTTGGTCGAGTAT	60.007	20	ATGCAATGTAGGCATTCGGT	60.002	20	258	62210	62467
NC_029432.1	12	p1	(T)14	14	13773	13786	CTGGAGTTTGCTCCCAGAAA	60	20	TGAGTTTCTCGACCCTTTGC	60.007	20	256	142149	142404	TGAGTTTCTCGACCCTTTGC	60.007	20	CTGGAGTTTGCTCCCAGAAA	60	20	256	104007	104262	TCACCCGTTTGGTCGAGTAT	60.007	20	ATGCAATGTAGGCATTCGGT	60.002	20	258	62210	62467
NC_029432.1	13	p1	(T)14	14	19780	19793	CTGGAGTTTGCTCCCAGAAA	60	20	TGAGTTTCTCGACCCTTTGC	60.007	20	256	142149	142404	TGAGTTTCTCGACCCTTTGC	60.007	20	CTGGAGTTTGCTCCCAGAAA	60	20	256	104007	104262	TCACCCGTTTGGTCGAGTAT	60.007	20	ATGCAATGTAGGCATTCGGT	60.002	20	258	62210	62467
NC_029432.1	14	p1	(C)11	11	23720	23730	CTGGAGTTTGCTCCCAGAAA	60	20	TGAGTTTCTCGACCCTTTGC	60.007	20	256	142149	142404	TGAGTTTCTCGACCCTTTGC	60.007	20	CTGGAGTTTGCTCCCAGAAA	60	20	256	104007	104262	TCACCCGTTTGGTCGAGTAT	60.007	20	ATGCAATGTAGGCATTCGGT	60.002	20	258	62210	62467
NC_029432.1	15	p2	(TA)6	12	28919	28930	CTGGAGTTTGCTCCCAGAAA	60	20	TGAGTTTCTCGACCCTTTGC	60.007	20	256	142149	142404	TGAGTTTCTCGACCCTTTGC	60.007	20	CTGGAGTTTGCTCCCAGAAA	60	20	256	104007	104262	TCACCCGTTTGGTCGAGTAT	60.007	20	ATGCAATGTAGGCATTCGGT	60.002	20	258	62210	62467
NC_029432.1	16	p1	(A)10	10	29032	29041	CTGGAGTTTGCTCCCAGAAA	60	20	TGAGTTTCTCGACCCTTTGC	60.007	20	256	142149	142404	TGAGTTTCTCGACCCTTTGC	60.007	20	CTGGAGTTTGCTCCCAGAAA	60	20	256	104007	104262	TCACCCGTTTGGTCGAGTAT	60.007	20	ATGCAATGTAGGCATTCGGT	60.002	20	258	62210	62467
NC_029432.1	17	p1	(T)10	10	31133	31142	CTGGAGTTTGCTCCCAGAAA	60	20	TGAGTTTCTCGACCCTTTGC	60.007	20	256	142149	142404	TGAGTTTCTCGACCCTTTGC	60.007	20	CTGGAGTTTGCTCCCAGAAA	60	20	256	104007	104262	TCACCCGTTTGGTCGAGTAT	60.007	20	ATGCAATGTAGGCATTCGGT	60.002	20	258	62210	62467
NC_029432.1	18	p2	(AT)6	12	33956	33967	CTGGAGTTTGCTCCCAGAAA	60	20	TGAGTTTCTCGACCCTTTGC	60.007	20	256	142149	142404	TGAGTTTCTCGACCCTTTGC	60.007	20	CTGGAGTTTGCTCCCAGAAA	60	20	256	104007	104262	TCACCCGTTTGGTCGAGTAT	60.007	20	ATGCAATGTAGGCATTCGGT	60.002	20	258	62210	62467
NC_029432.1	19	p2	(AT)6	12	34074	34085	CTGGAGTTTGCTCCCAGAAA	60	20	TGAGTTTCTCGACCCTTTGC	60.007	20	256	142149	142404	TGAGTTTCTCGACCCTTTGC	60.007	20	CTGGAGTTTGCTCCCAGAAA	60	20	256	104007	104262	TCACCCGTTTGGTCGAGTAT	60.007	20	ATGCAATGTAGGCATTCGGT	60.002	20	258	62210	62467
NC_029432.1	20	p1	(A)11	11	35190	35200	CTGGAGTTTGCTCCCAGAAA	60	20	TGAGTTTCTCGACCCTTTGC	60.007	20	256	142149	142404	TGAGTTTCTCGACCCTTTGC	60.007	20	CTGGAGTTTGCTCCCAGAAA	60	20	256	104007	104262	TCACCCGTTTGGTCGAGTAT	60.007	20	ATGCAATGTAGGCATTCGGT	60.002	20	258	62210	62467
NC_029432.1	21	c	(TA)7tgaaaatatattcaattaagttctaaattcagttatatatagaaatttagt(TA)8	81	35369	35449	CTGGAGTTTGCTCCCAGAAA	60	20	TGAGTTTCTCGACCCTTTGC	60.007	20	256	142149	142404	TGAGTTTCTCGACCCTTTGC	60.007	20	CTGGAGTTTGCTCCCAGAAA	60	20	256	104007	104262	TCACCCGTTTGGTCGAGTAT	60.007	20	ATGCAATGTAGGCATTCGGT	60.002	20	258	62210	62467
NC_029432.1	22	p1	(T)10	10	38442	38451	CTGGAGTTTGCTCCCAGAAA	60	20	TGAGTTTCTCGACCCTTTGC	60.007	20	256	142149	142404	TGAGTTTCTCGACCCTTTGC	60.007	20	CTGGAGTTTGCTCCCAGAAA	60	20	256	104007	104262	TCACCCGTTTGGTCGAGTAT	60.007	20	ATGCAATGTAGGCATTCGGT	60.002	20	258	62210	62467
NC_029432.1	23	p1	(A)11	11	39290	39300	CTGGAGTTTGCTCCCAGAAA	60	20	TGAGTTTCTCGACCCTTTGC	60.007	20	256	142149	142404	TGAGTTTCTCGACCCTTTGC	60.007	20	CTGGAGTTTGCTCCCAGAAA	60	20	256	104007	104262	TCACCCGTTTGGTCGAGTAT	60.007	20	ATGCAATGTAGGCATTCGGT	60.002	20	258	62210	62467
NC_029432.1	24	p1	(T)11	11	40547	40557	CTGGAGTTTGCTCCCAGAAA	60	20	TGAGTTTCTCGACCCTTTGC	60.007	20	256	142149	142404	TGAGTTTCTCGACCCTTTGC	60.007	20	CTGGAGTTTGCTCCCAGAAA	60	20	256	104007	104262	TCACCCGTTTGGTCGAGTAT	60.007	20	ATGCAATGTAGGCATTCGGT	60.002	20	258	62210	62467
NC_029432.1	25	p1	(T)10	10	45679	45688	CTGGAGTTTGCTCCCAGAAA	60	20	TGAGTTTCTCGACCCTTTGC	60.007	20	256	142149	142404	TGAGTTTCTCGACCCTTTGC	60.007	20	CTGGAGTTTGCTCCCAGAAA	60	20	256	104007	104262	TCACCCGTTTGGTCGAGTAT	60.007	20	ATGCAATGTAGGCATTCGGT	60.002	20	258	62210	62467
NC_029432.1	26	p1	(A)10	10	50169	50178	CTGGAGTTTGCTCCCAGAAA	60	20	TGAGTTTCTCGACCCTTTGC	60.007	20	256	142149	142404	TGAGTTTCTCGACCCTTTGC	60.007	20	CTGGAGTTTGCTCCCAGAAA	60	20	256	104007	104262	TCACCCGTTTGGTCGAGTAT	60.007	20	ATGCAATGTAGGCATTCGGT	60.002	20	258	62210	62467
NC_029432.1	27	p2	(TA)10	20	50626	50645	CTGGAGTTTGCTCCCAGAAA	60	20	TGAGTTTCTCGACCCTTTGC	60.007	20	256	142149	142404	TGAGTTTCTCGACCCTTTGC	60.007	20	CTGGAGTTTGCTCCCAGAAA	60	20	256	104007	104262	TCACCCGTTTGGTCGAGTAT	60.007	20	ATGCAATGTAGGCATTCGGT	60.002	20	258	62210	62467
NC_029432.1	28	p1	(A)10	10	54958	54967	CTGGAGTTTGCTCCCAGAAA	60	20	TGAGTTTCTCGACCCTTTGC	60.007	20	256	142149	142404	TGAGTTTCTCGACCCTTTGC	60.007	20	CTGGAGTTTGCTCCCAGAAA	60	20	256	104007	104262	TCACCCGTTTGGTCGAGTAT	60.007	20	ATGCAATGTAGGCATTCGGT	60.002	20	258	62210	62467
NC_029432.1	29	p1	(T)13	13	56010	56022	CTGGAGTTTGCTCCCAGAAA	60	20	TGAGTTTCTCGACCCTTTGC	60.007	20	256	142149	142404	TGAGTTTCTCGACCCTTTGC	60.007	20	CTGGAGTTTGCTCCCAGAAA	60	20	256	104007	104262	TCACCCGTTTGGTCGAGTAT	60.007	20	ATGCAATGTAGGCATTCGGT	60.002	20	258	62210	62467
NC_029432.1	30	p1	(T)11	11	58318	58328	CTGGAGTTTGCTCCCAGAAA	60	20	TGAGTTTCTCGACCCTTTGC	60.007	20	256	142149	142404	TGAGTTTCTCGACCCTTTGC	60.007	20	CTGGAGTTTGCTCCCAGAAA	60	20	256	104007	104262	TCACCCGTTTGGTCGAGTAT	60.007	20	ATGCAATGTAGGCATTCGGT	60.002	20	258	62210	62467
NC_029432.1	31	p1	(A)10	10	62892	62901	CTGGAGTTTGCTCCCAGAAA	60	20	TGAGTTTCTCGACCCTTTGC	60.007	20	256	142149	142404	TGAGTTTCTCGACCCTTTGC	60.007	20	CTGGAGTTTGCTCCCAGAAA	60	20	256	104007	104262	TCACCCGTTTGGTCGAGTAT	60.007	20	ATGCAATGTAGGCATTCGGT	60.002	20	258	62210	62467
NC_029432.1	32	p2	(AT)7	14	63231	63244	CTGGAGTTTGCTCCCAGAAA	60	20	TGAGTTTCTCGACCCTTTGC	60.007	20	256	142149	142404	TGAGTTTCTCGACCCTTTGC	60.007	20	CTGGAGTTTGCTCCCAGAAA	60	20	256	104007	104262	TCACCCGTTTGGTCGAGTAT	60.007	20	ATGCAATGTAGGCATTCGGT	60.002	20	258	62210	62467
NC_029432.1	33	p1	(T)10	10	64816	64825	CTGGAGTTTGCTCCCAGAAA	60	20	TGAGTTTCTCGACCCTTTGC	60.007	20	256	142149	142404	TGAGTTTCTCGACCCTTTGC	60.007	20	CTGGAGTTTGCTCCCAGAAA	60	20	256	104007	104262	TCACCCGTTTGGTCGAGTAT	60.007	20	ATGCAATGTAGGCATTCGGT	60.002	20	258	62210	62467
NC_029432.1	34	p1	(A)13	13	70320	70332	CTGGAGTTTGCTCCCAGAAA	60	20	TGAGTTTCTCGACCCTTTGC	60.007	20	256	142149	142404	TGAGTTTCTCGACCCTTTGC	60.007	20	CTGGAGTTTGCTCCCAGAAA	60	20	256	104007	104262	TCACCCGTTTGGTCGAGTAT	60.007	20	ATGCAATGTAGGCATTCGGT	60.002	20	258	62210	62467
NC_029432.1	35	p1	(A)17	17	70667	70683	CTGGAGTTTGCTCCCAGAAA	60	20	TGAGTTTCTCGACCCTTTGC	60.007	20	256	142149	142404	TGAGTTTCTCGACCCTTTGC	60.007	20	CTGGAGTTTGCTCCCAGAAA	60	20	256	104007	104262	TCACCCGTTTGGTCGAGTAT	60.007	20	ATGCAATGTAGGCATTCGGT	60.002	20	258	62210	62467
NC_029432.1	36	p1	(T)10	10	71714	71723	CTGGAGTTTGCTCCCAGAAA	60	20	TGAGTTTCTCGACCCTTTGC	60.007	20	256	142149	142404	TGAGTTTCTCGACCCTTTGC	60.007	20	CTGGAGTTTGCTCCCAGAAA	60	20	256	104007	104262	TCACCCGTTTGGTCGAGTAT	60.007	20	ATGCAATGTAGGCATTCGGT	60.002	20	258	62210	62467
NC_029432.1	37	p1	(T)10	10	74723	74732	CTGGAGTTTGCTCCCAGAAA	60	20	TGAGTTTCTCGACCCTTTGC	60.007	20	256	142149	142404	TGAGTTTCTCGACCCTTTGC	60.007	20	CTGGAGTTTGCTCCCAGAAA	60	20	256	104007	104262	TCACCCGTTTGGTCGAGTAT	60.007	20	ATGCAATGTAGGCATTCGGT	60.002	20	258	62210	62467
NC_029432.1	38	p1	(A)11	11	75390	75400	CTGGAGTTTGCTCCCAGAAA	60	20	TGAGTTTCTCGACCCTTTGC	60.007	20	256	142149	142404	TGAGTTTCTCGACCCTTTGC	60.007	20	CTGGAGTTTGCTCCCAGAAA	60	20	256	104007	104262	TCACCCGTTTGGTCGAGTAT	60.007	20	ATGCAATGTAGGCATTCGGT	60.002	20	258	62210	62467
NC_029432.1	39	p1	(T)10	10	75734	75743	CTGGAGTTTGCTCCCAGAAA	60	20	TGAGTTTCTCGACCCTTTGC	60.007	20	256	142149	142404	TGAGTTTCTCGACCCTTTGC	60.007	20	CTGGAGTTTGCTCCCAGAAA	60	20	256	104007	104262	TCACCCGTTTGGTCGAGTAT	60.007	20	ATGCAATGTAGGCATTCGGT	60.002	20	258	62210	62467
NC_029432.1	40	p1	(T)10	10	79470	79479	CTGGAGTTTGCTCCCAGAAA	60	20	TGAGTTTCTCGACCCTTTGC	60.007	20	256	142149	142404	TGAGTTTCTCGACCCTTTGC	60.007	20	CTGGAGTTTGCTCCCAGAAA	60	20	256	104007	104262	TCACCCGTTTGGTCGAGTAT	60.007	20	ATGCAATGTAGGCATTCGGT	60.002	20	258	62210	62467
NC_029432.1	41	p1	(T)10	10	86652	86661	CTGGAGTTTGCTCCCAGAAA	60	20	TGAGTTTCTCGACCCTTTGC	60.007	20	256	142149	142404	TGAGTTTCTCGACCCTTTGC	60.007	20	CTGGAGTTTGCTCCCAGAAA	60	20	256	104007	104262	TCACCCGTTTGGTCGAGTAT	60.007	20	ATGCAATGTAGGCATTCGGT	60.002	20	258	62210	62467
NC_029432.1	42	p1	(T)10	10	88751	88760	CTGGAGTTTGCTCCCAGAAA	60	20	TGAGTTTCTCGACCCTTTGC	60.007	20	256	142149	142404	TGAGTTTCTCGACCCTTTGC	60.007	20	CTGGAGTTTGCTCCCAGAAA	60	20	256	104007	104262	TCACCCGTTTGGTCGAGTAT	60.007	20	ATGCAATGTAGGCATTCGGT	60.002	20	258	62210	62467
NC_029432.1	43	p1	(T)10	10	103738	103747	CTGGAGTTTGCTCCCAGAAA	60	20	TGAGTTTCTCGACCCTTTGC	60.007	20	256	142149	142404	TGAGTTTCTCGACCCTTTGC	60.007	20	CTGGAGTTTGCTCCCAGAAA	60	20	256	104007	104262	TCACCCGTTTGGTCGAGTAT	60.007	20	ATGCAATGTAGGCATTCGGT	60.002	20	258	62210	62467
NC_029432.1	44	p2	(TA)8	16	112917	112932	CTGGAGTTTGCTCCCAGAAA	60	20	TGAGTTTCTCGACCCTTTGC	60.007	20	256	142149	142404	TGAGTTTCTCGACCCTTTGC	60.007	20	CTGGAGTTTGCTCCCAGAAA	60	20	256	104007	104262	TCACCCGTTTGGTCGAGTAT	60.007	20	ATGCAATGTAGGCATTCGGT	60.002	20	258	62210	62467
NC_029432.1	45	p1	(A)10	10	116233	116242	CTGGAGTTTGCTCCCAGAAA	60	20	TGAGTTTCTCGACCCTTTGC	60.007	20	256	142149	142404	TGAGTTTCTCGACCCTTTGC	60.007	20	CTGGAGTTTGCTCCCAGAAA	60	20	256	104007	104262	TCACCCGTTTGGTCGAGTAT	60.007	20	ATGCAATGTAGGCATTCGGT	60.002	20	258	62210	62467
NC_029432.1	46	p1	(T)10	10	117076	117085	CTGGAGTTTGCTCCCAGAAA	60	20	TGAGTTTCTCGACCCTTTGC	60.007	20	256	142149	142404	TGAGTTTCTCGACCCTTTGC	60.007	20	CTGGAGTTTGCTCCCAGAAA	60	20	256	104007	104262	TCACCCGTTTGGTCGAGTAT	60.007	20	ATGCAATGTAGGCATTCGGT	60.002	20	258	62210	62467
NC_029432.1	47	p1	(A)14	14	124583	124596	CTGGAGTTTGCTCCCAGAAA	60	20	TGAGTTTCTCGACCCTTTGC	60.007	20	256	142149	142404	TGAGTTTCTCGACCCTTTGC	60.007	20	CTGGAGTTTGCTCCCAGAAA	60	20	256	104007	104262	TCACCCGTTTGGTCGAGTAT	60.007	20	ATGCAATGTAGGCATTCGGT	60.002	20	258	62210	62467
NC_029432.1	48	p1	(T)10	10	128801	128810	CTGGAGTTTGCTCCCAGAAA	60	20	TGAGTTTCTCGACCCTTTGC	60.007	20	256	142149	142404	TGAGTTTCTCGACCCTTTGC	60.007	20	CTGGAGTTTGCTCCCAGAAA	60	20	256	104007	104262	TCACCCGTTTGGTCGAGTAT	60.007	20	ATGCAATGTAGGCATTCGGT	60.002	20	258	62210	62467
NC_029432.1	49	p1	(T)10	10	131249	131258	CTGGAGTTTGCTCCCAGAAA	60	20	TGAGTTTCTCGACCCTTTGC	60.007	20	256	142149	142404	TGAGTTTCTCGACCCTTTGC	60.007	20	CTGGAGTTTGCTCCCAGAAA	60	20	256	104007	104262	TCACCCGTTTGGTCGAGTAT	60.007	20	ATGCAATGTAGGCATTCGGT	60.002	20	258	62210	62467
NC_029432.1	50	p1	(T)10	10	132098	132107	CTGGAGTTTGCTCCCAGAAA	60	20	TGAGTTTCTCGACCCTTTGC	60.007	20	256	142149	142404	TGAGTTTCTCGACCCTTTGC	60.007	20	CTGGAGTTTGCTCCCAGAAA	60	20	256	104007	104262	TCACCCGTTTGGTCGAGTAT	60.007	20	ATGCAATGTAGGCATTCGGT	60.002	20	258	62210	62467
NC_029432.1	51	p2	(TA)8	16	133481	133496	CTGGAGTTTGCTCCCAGAAA	60	20	TGAGTTTCTCGACCCTTTGC	60.007	20	256	142149	142404	TGAGTTTCTCGACCCTTTGC	60.007	20	CTGGAGTTTGCTCCCAGAAA	60	20	256	104007	104262	TCACCCGTTTGGTCGAGTAT	60.007	20	ATGCAATGTAGGCATTCGGT	60.002	20	258	62210	62467
NC_029432.1	52	p1	(A)10	10	142666	142675	CTGGAGTTTGCTCCCAGAAA	60	20	TGAGTTTCTCGACCCTTTGC	60.007	20	256	142149	142404	TGAGTTTCTCGACCCTTTGC	60.007	20	CTGGAGTTTGCTCCCAGAAA	60	20	256	104007	104262	TCACCCGTTTGGTCGAGTAT	60.007	20	ATGCAATGTAGGCATTCGGT	60.002	20	258	62210	62467
NC_029432.1	53	p1	(A)10	10	157653	157662	CTGGAGTTTGCTCCCAGAAA	60	20	TGAGTTTCTCGACCCTTTGC	60.007	20	256	142149	142404	TGAGTTTCTCGACCCTTTGC	60.007	20	CTGGAGTTTGCTCCCAGAAA	60	20	256	104007	104262	TCACCCGTTTGGTCGAGTAT	60.007	20	ATGCAATGTAGGCATTCGGT	60.002	20	258	62210	62467
NC_029429.1	1	p1	(T)11	11	1870	1880	CCCTGAATCCACAAGTACCG	60	20	GGTTCACGTAGGAATGGACG	60.007	20	163	85508	85670	GGTTAACTAATTGCCGGGCT	60.002	20	TATCGCTGGAAAAGCCAAAG	59.991	20	128	49406	49533	CTTTGGCTTTTCCAGCGATA	59.991	20	AAAAATACGCCGTCTAGGGG	59.996	20	200	49514	49713
[truncated: 544 more rows]

[truncated: 1 more sheets: Table S11]
